# Supplementary material
Source: PubMed Central journal article supplement (PMC3383260)
Supplement: supp_125.10.2500_JCS101378FigS3.pdf [file supp_125.10.2500_JCS101378FigS3.pdf]

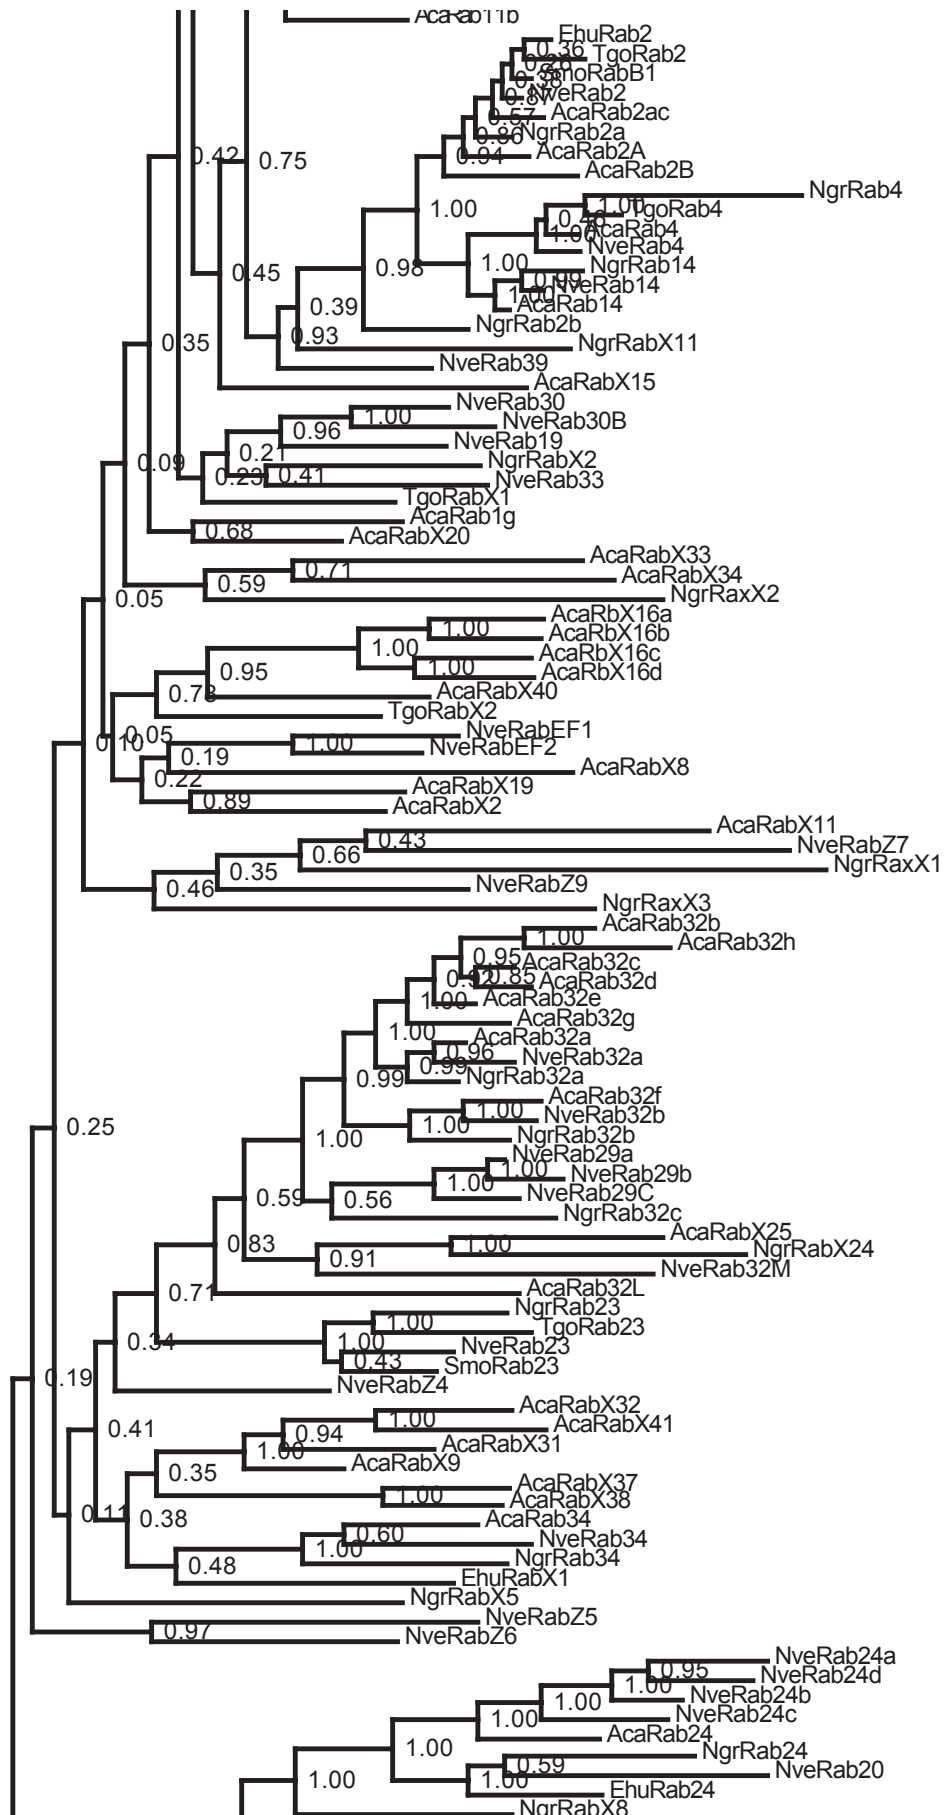

Elias et. al. Figure S3: MB\_page2

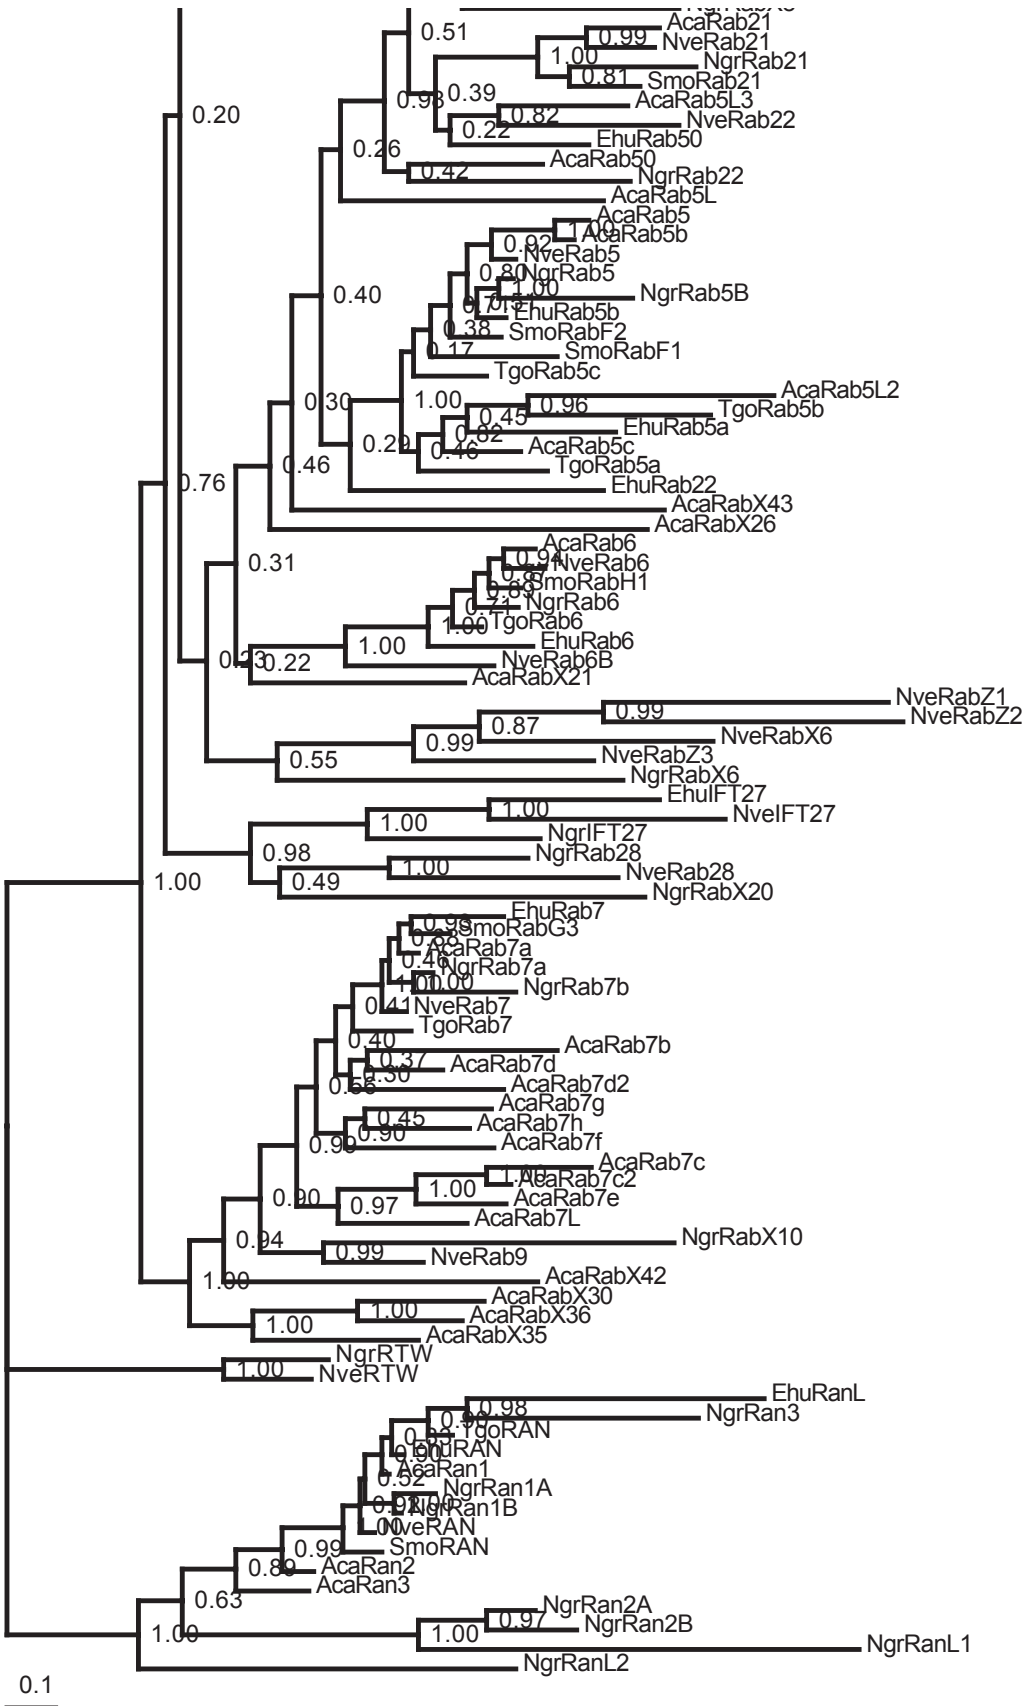

Elias et. al. Figure S3: MB\_page3

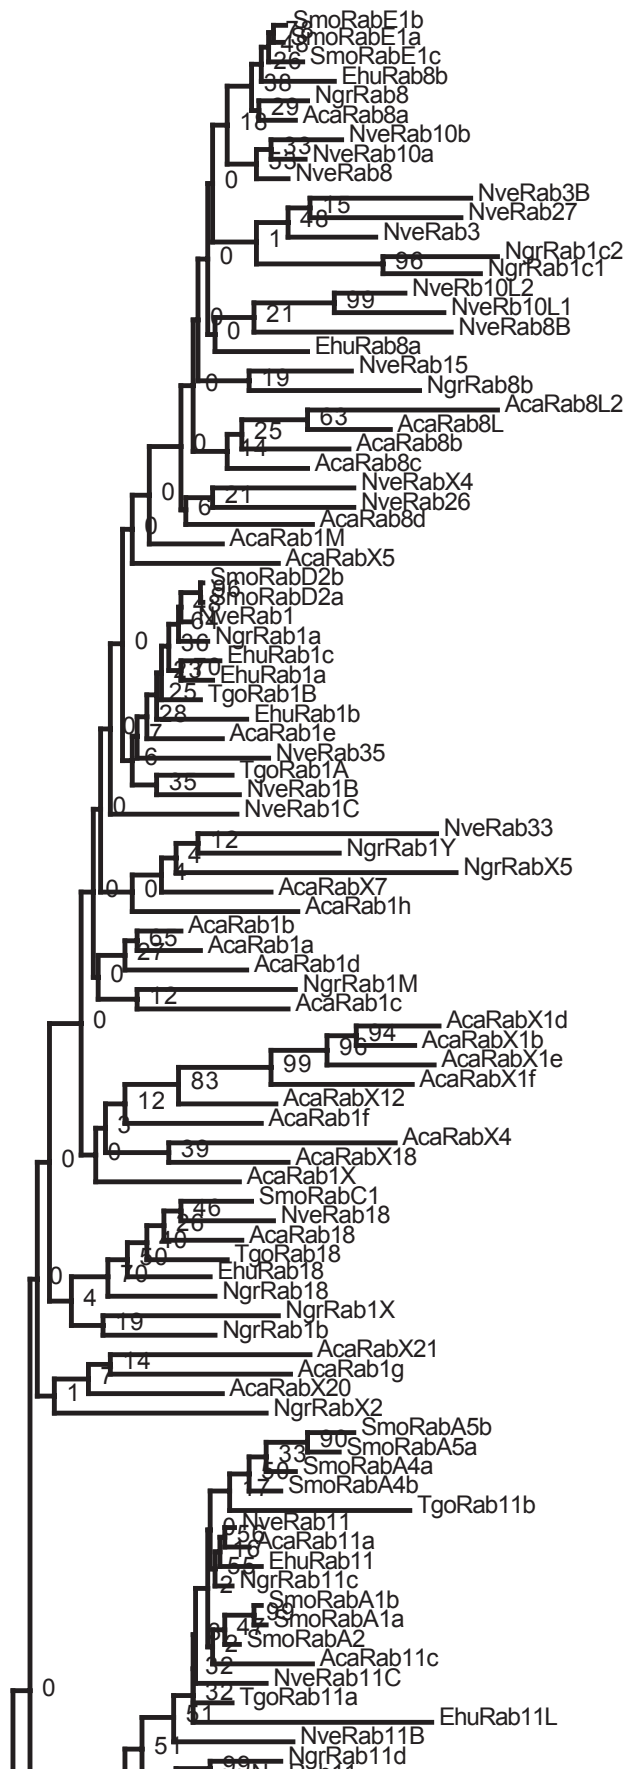

Elias et. al. Figure S3: PhyML\_page1

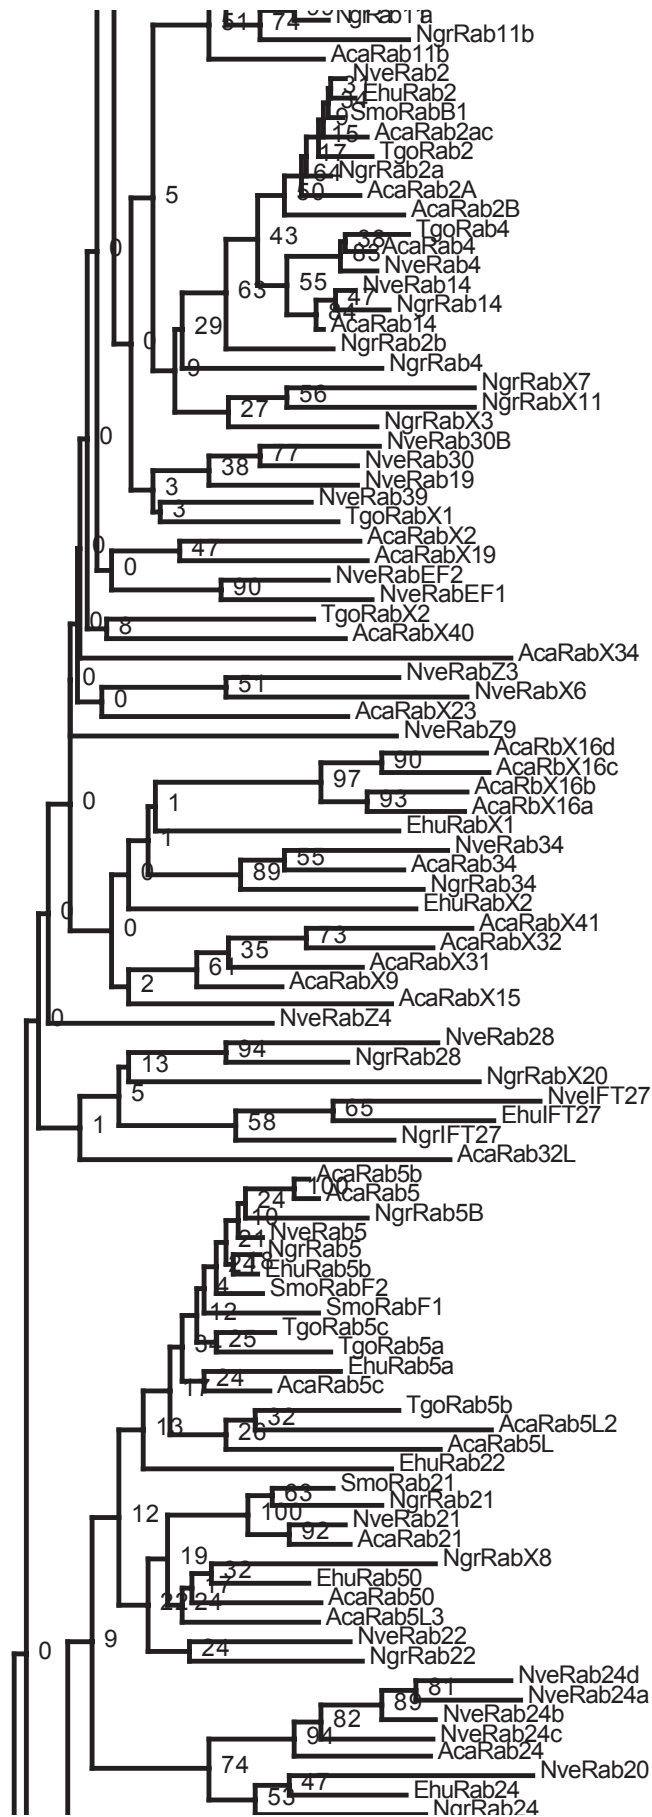

Elias et. al. Figure S3: PhyML\_page2

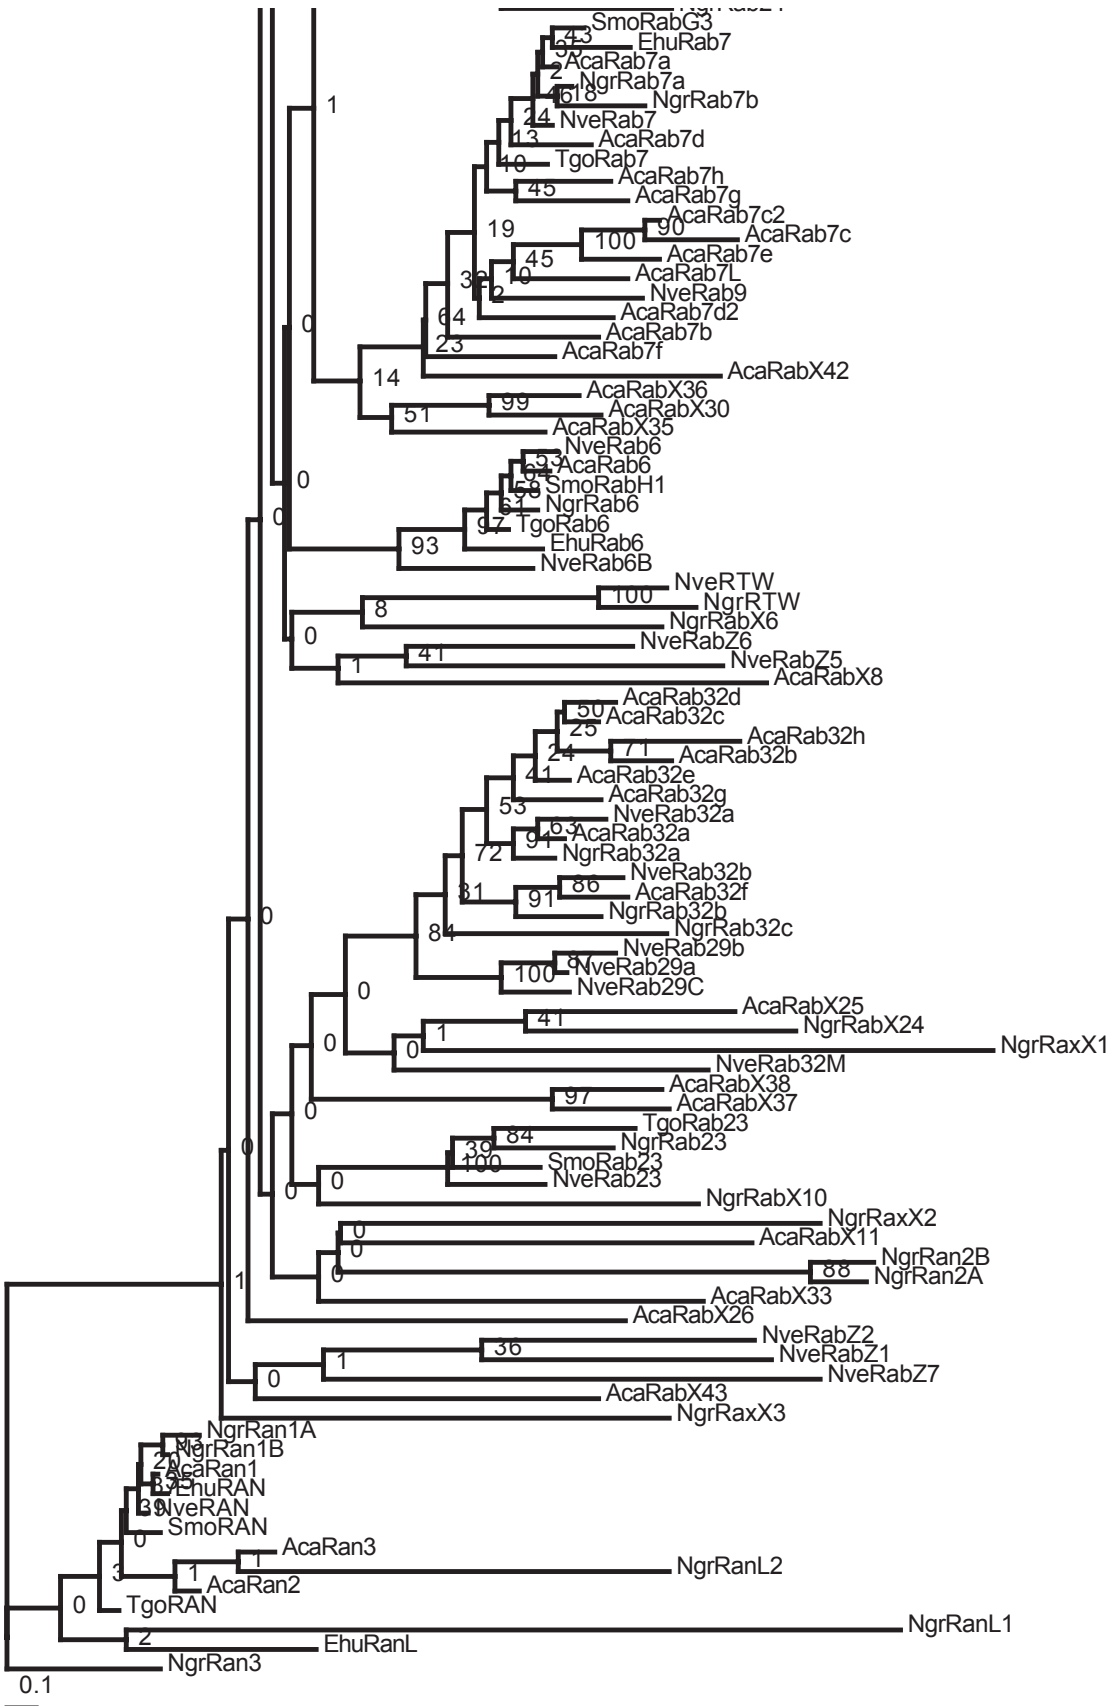

Elias et. al. Figure S3:PhyML\_page3

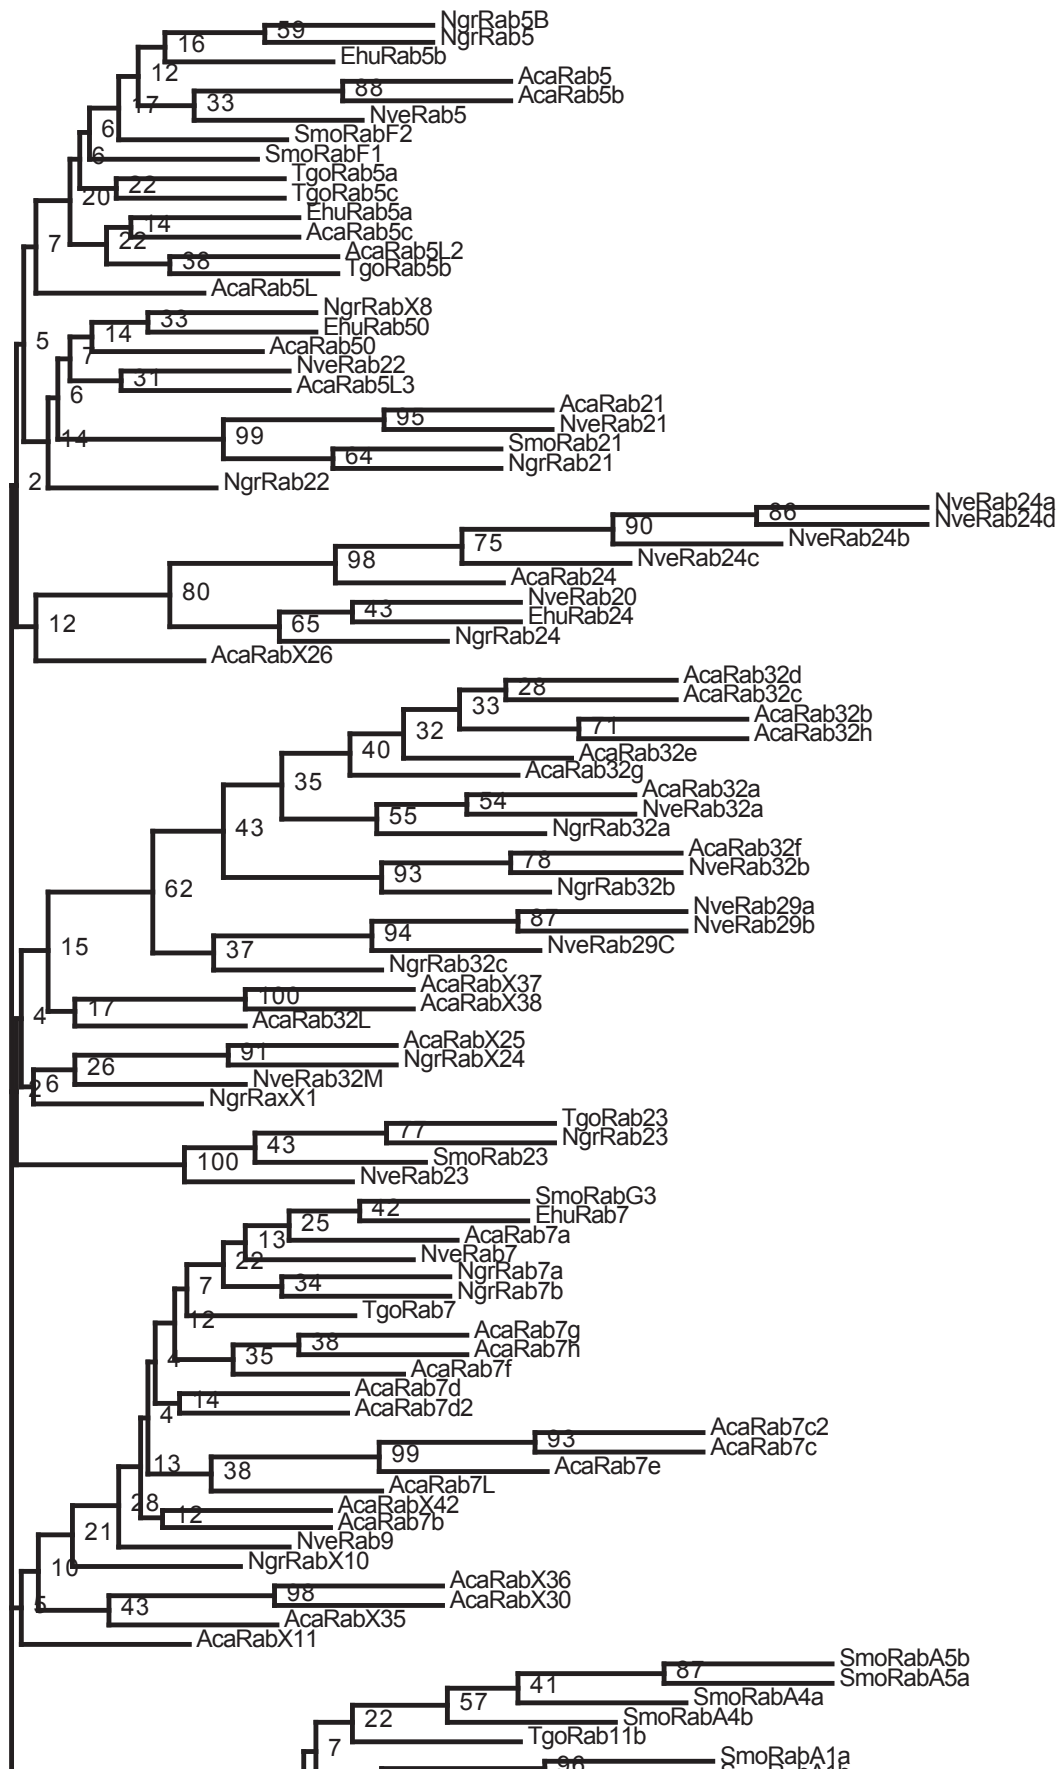

Elias et. al. Figure S3: RAxML\_page1





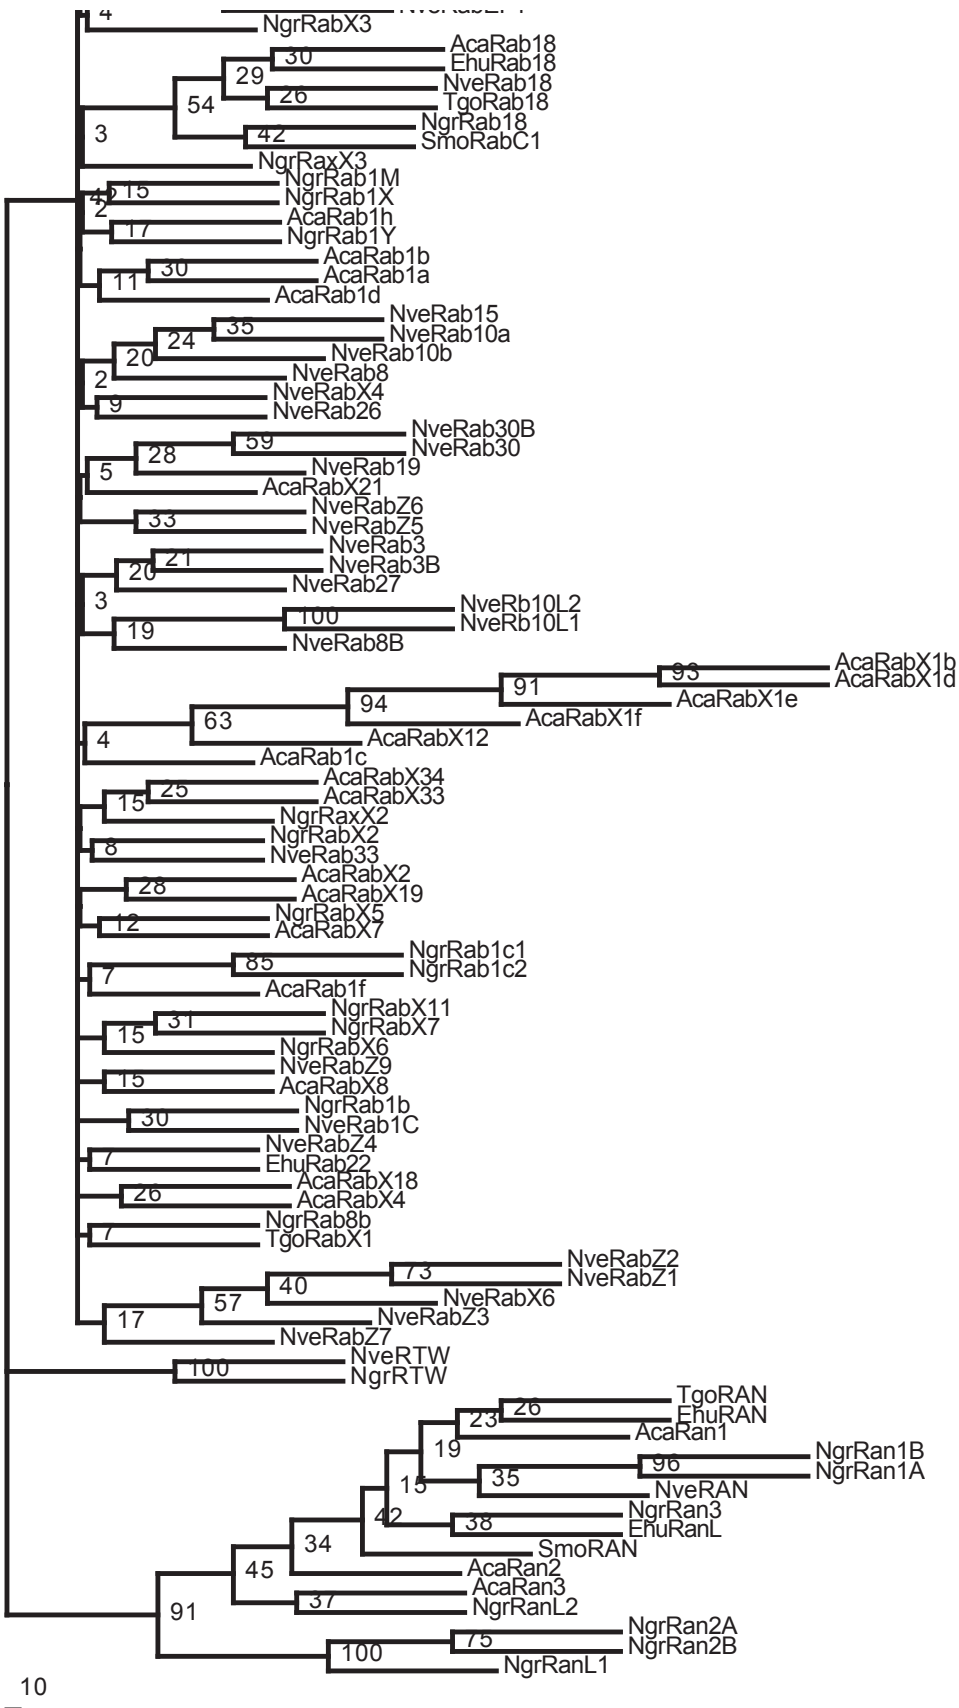

Elias et. al. Figure S3: RAxML\_page3
