# Supplementary material
Source: PubMed Central journal article supplement (PMC3383260)
Supplement: supp_125.10.2500_JCS101378FigS5.pdf [file supp_125.10.2500_JCS101378FigS5.pdf]

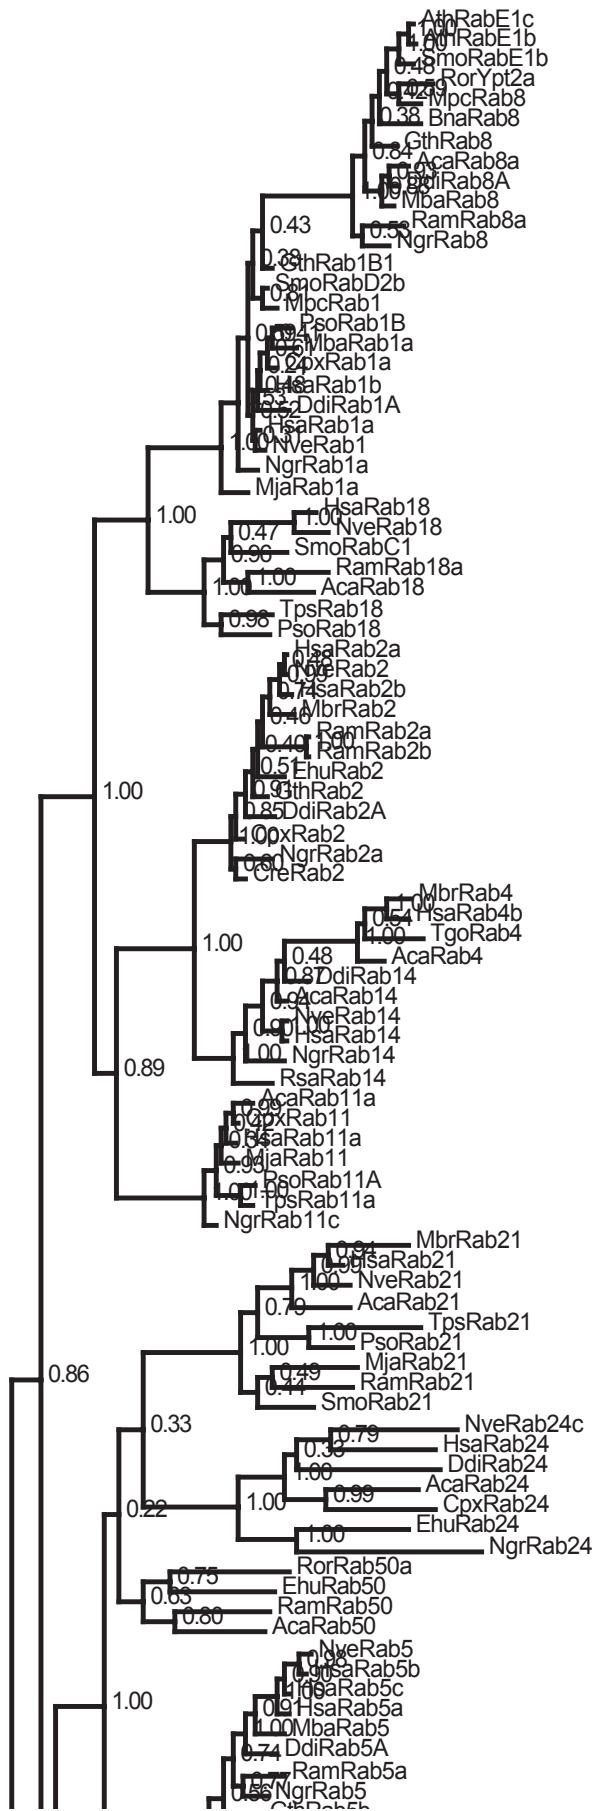

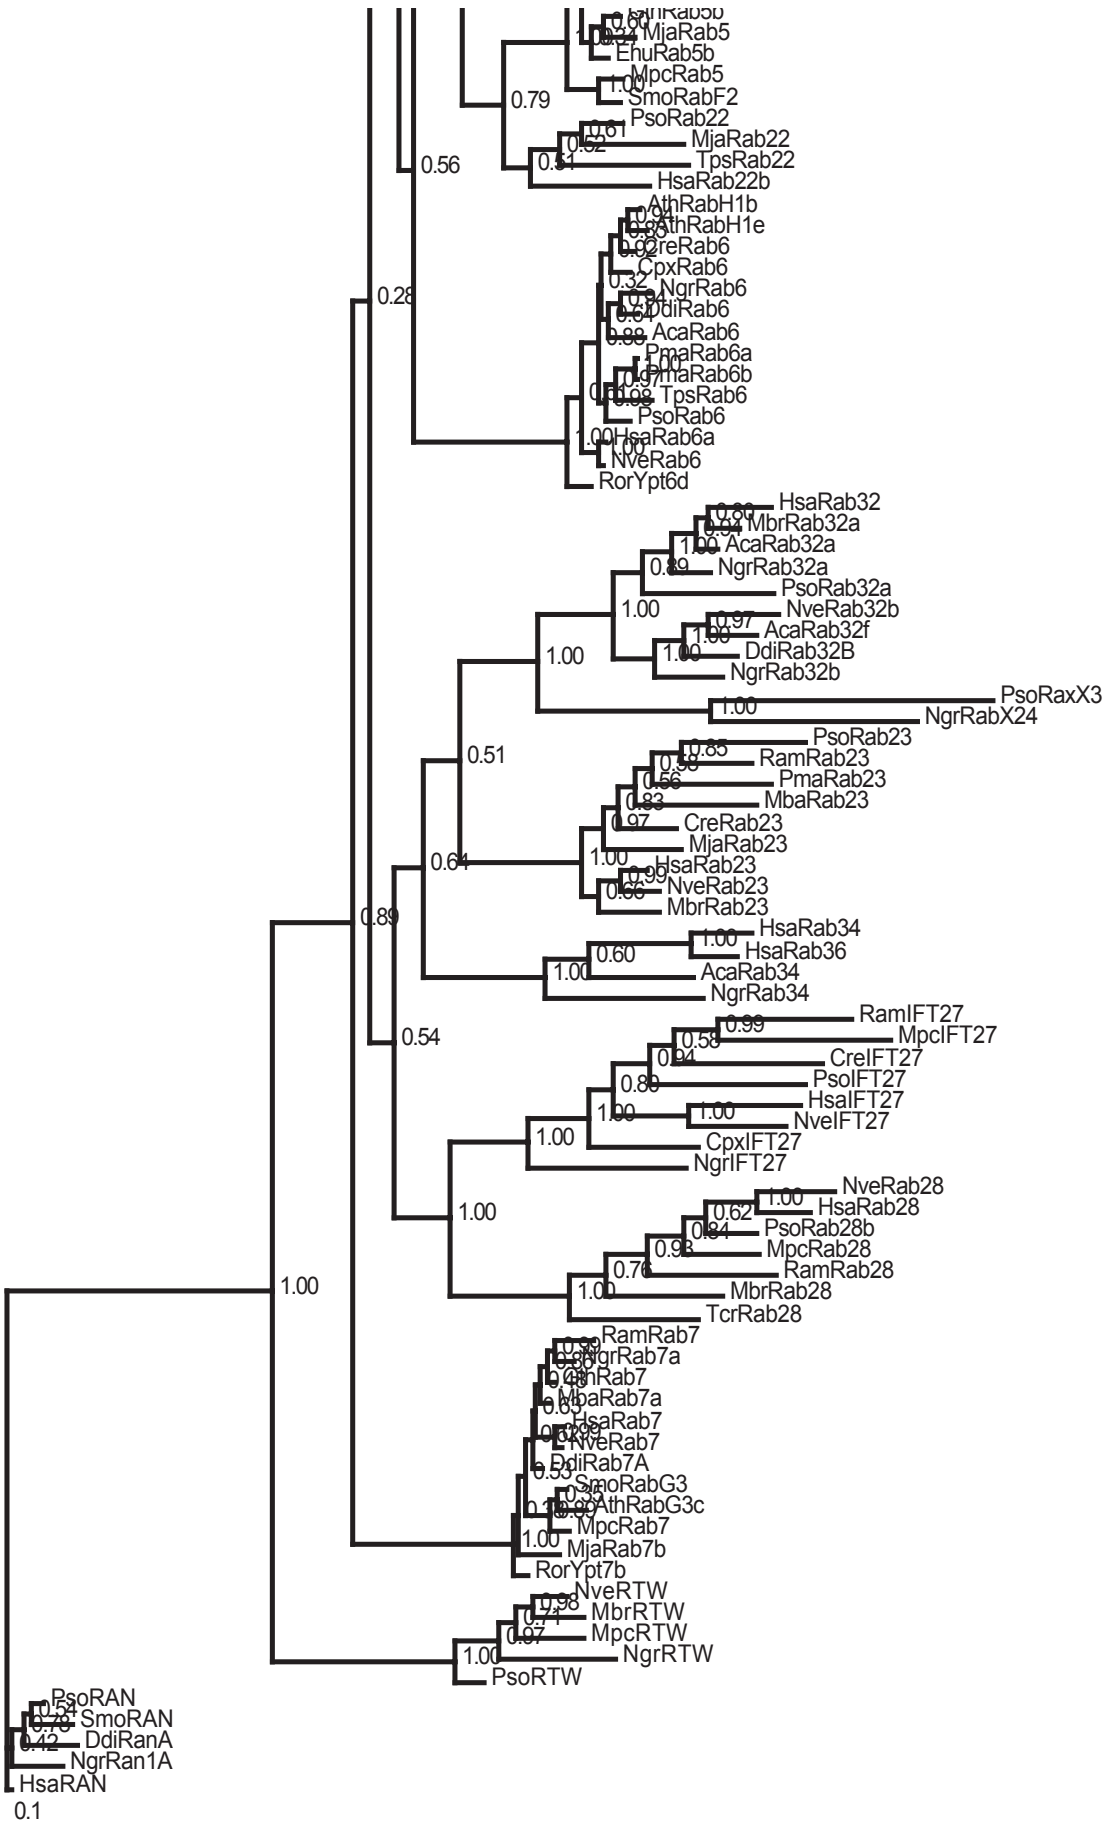

Elias et. al. Figure S5: MB\_page2

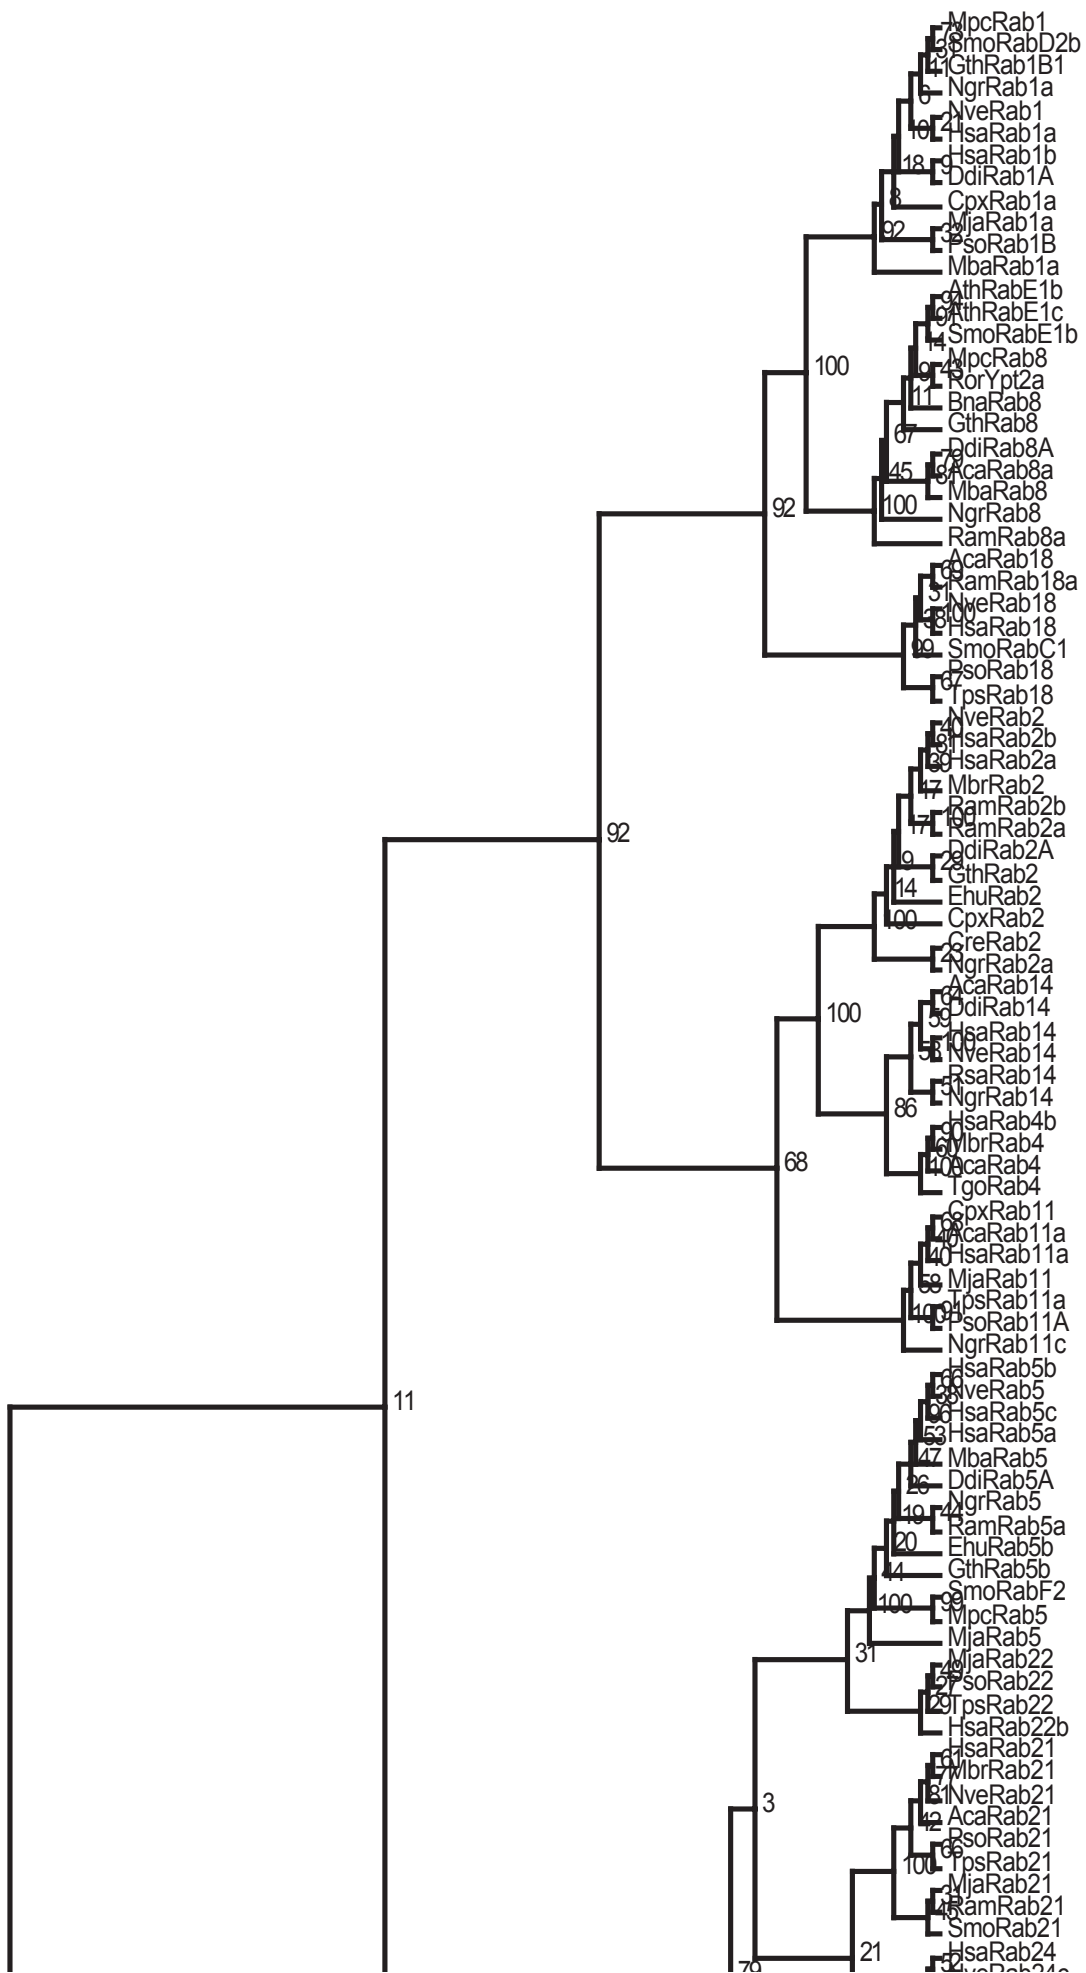

Elias et. al. Figure S5: PhyML\_page1



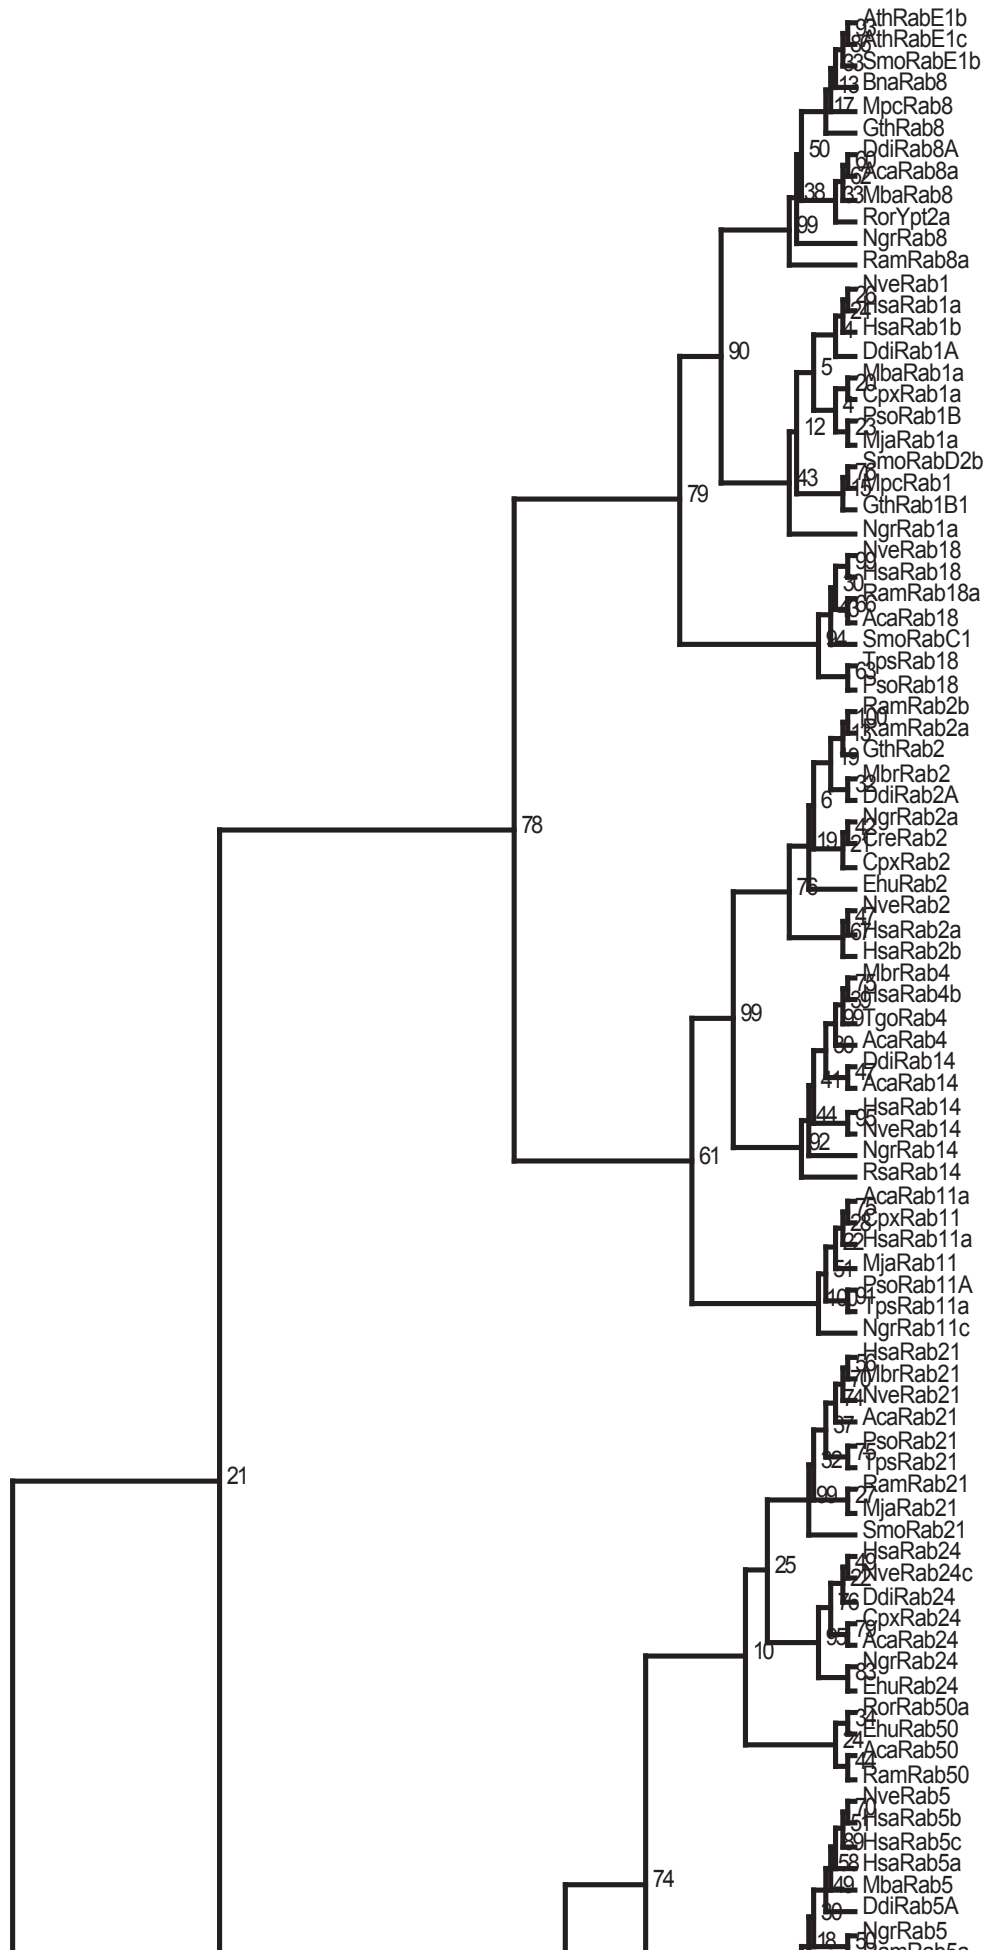

Elias et. al. Figure S5: RAxML\_page1

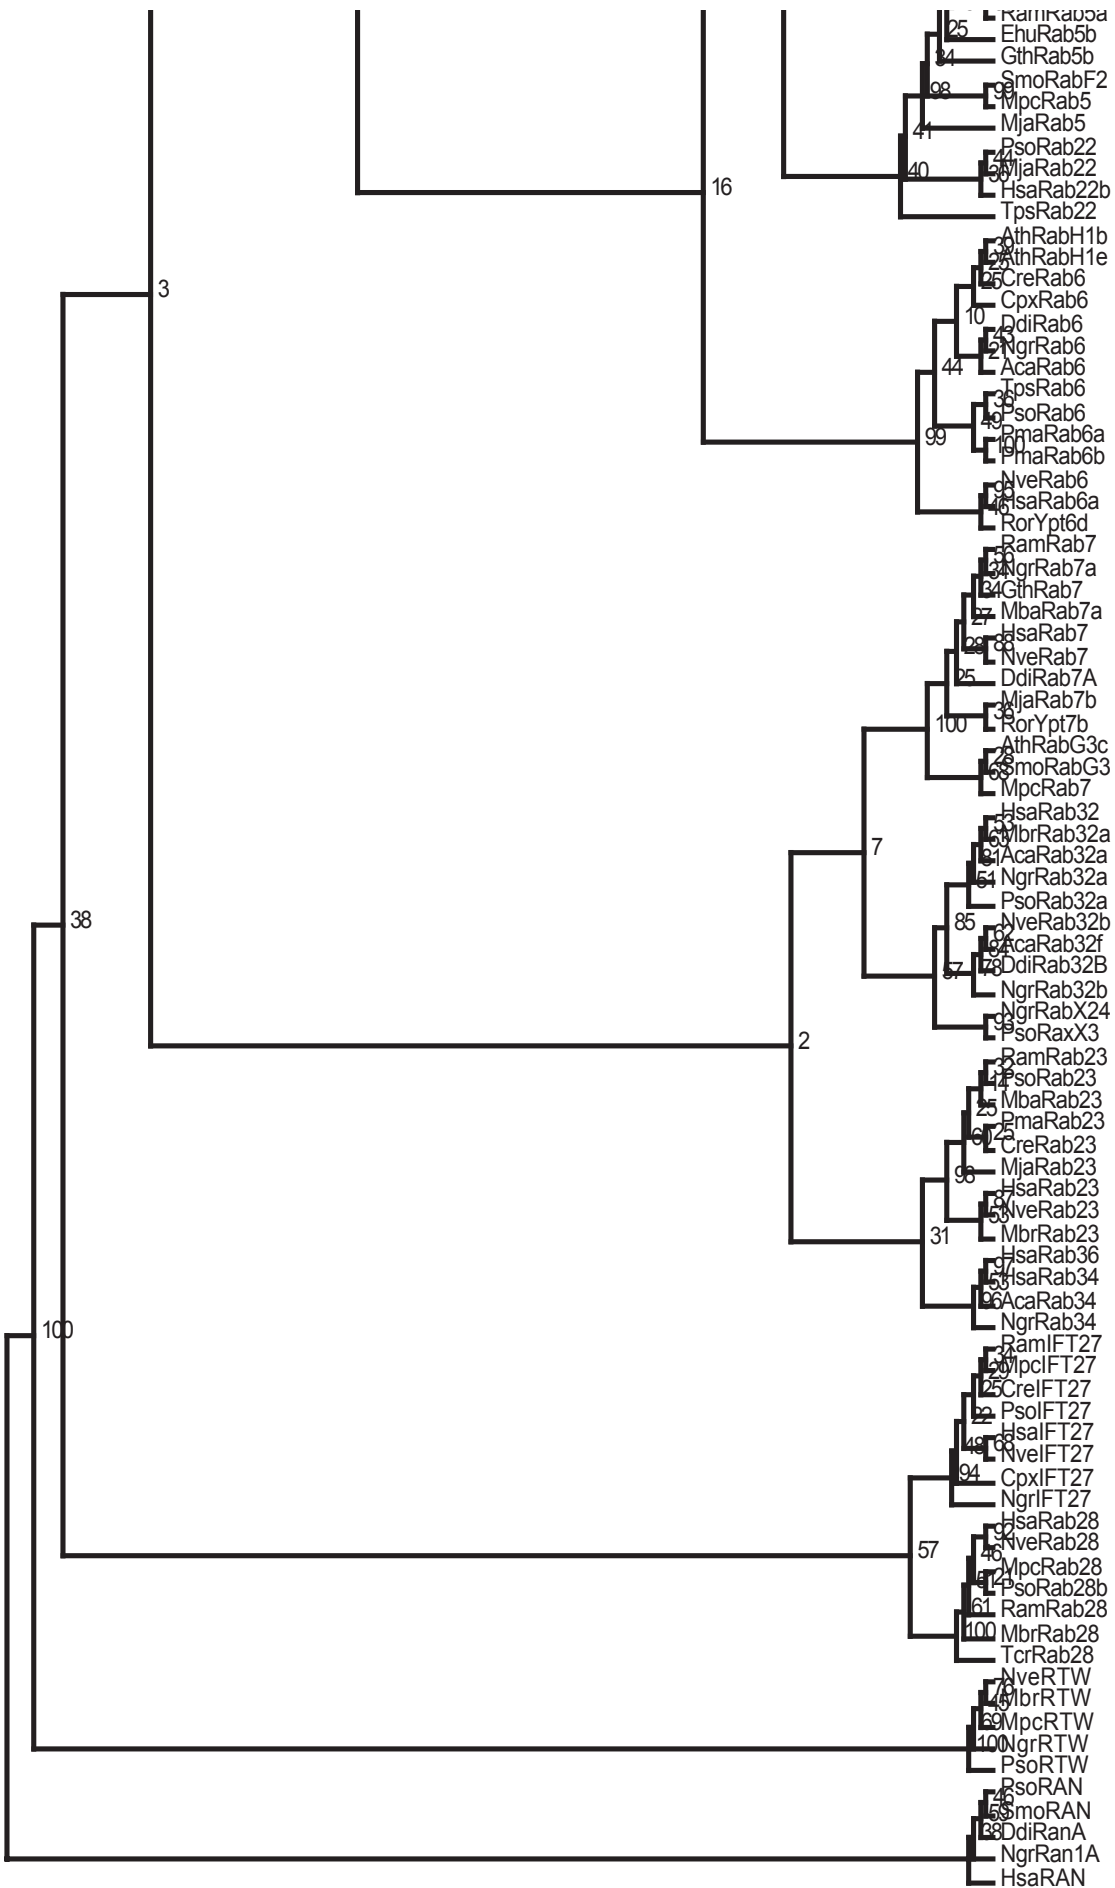

Elias et. al. Figure S5: RAXML\_page2
