# Supplementary material
Source: PubMed Central journal article supplement (PMC3383260)

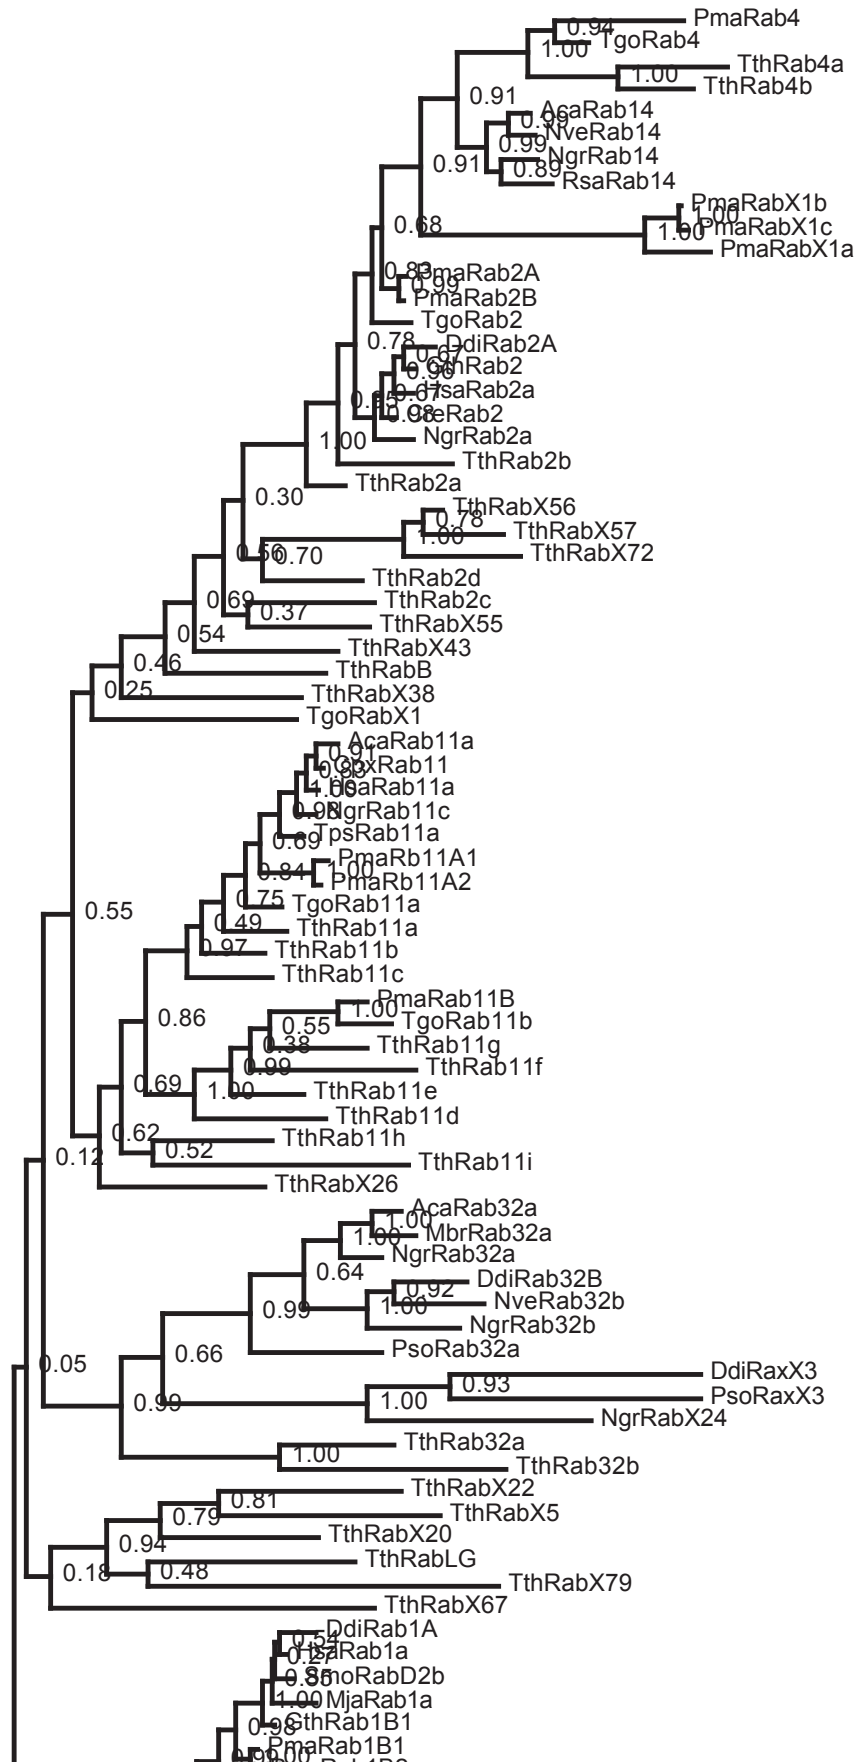

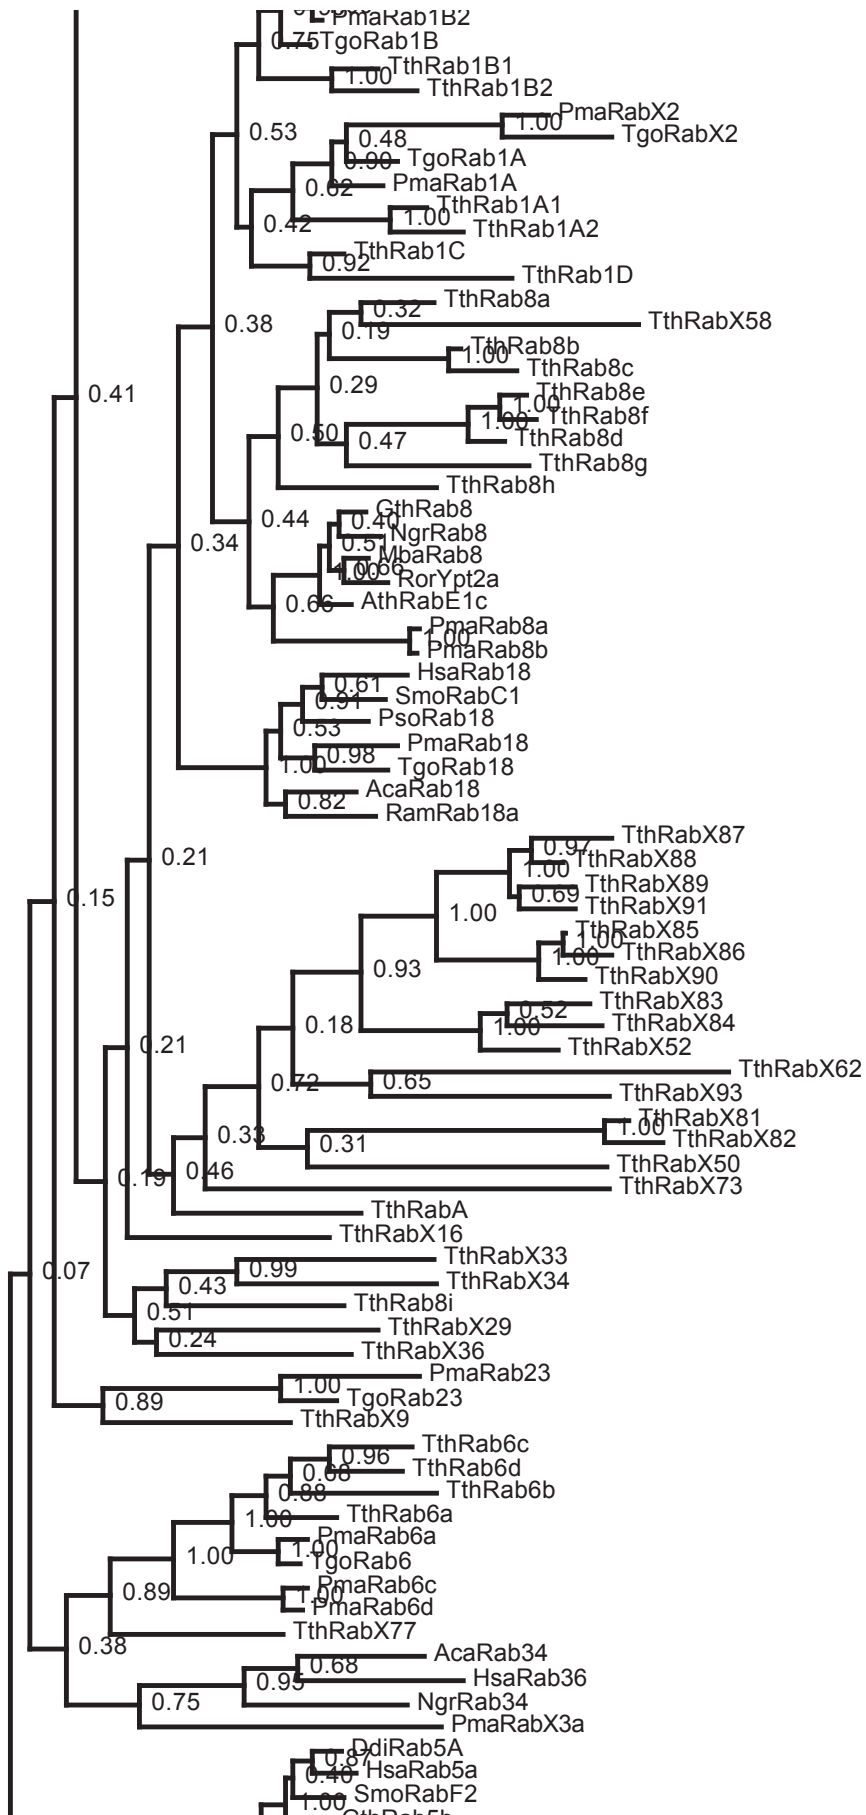

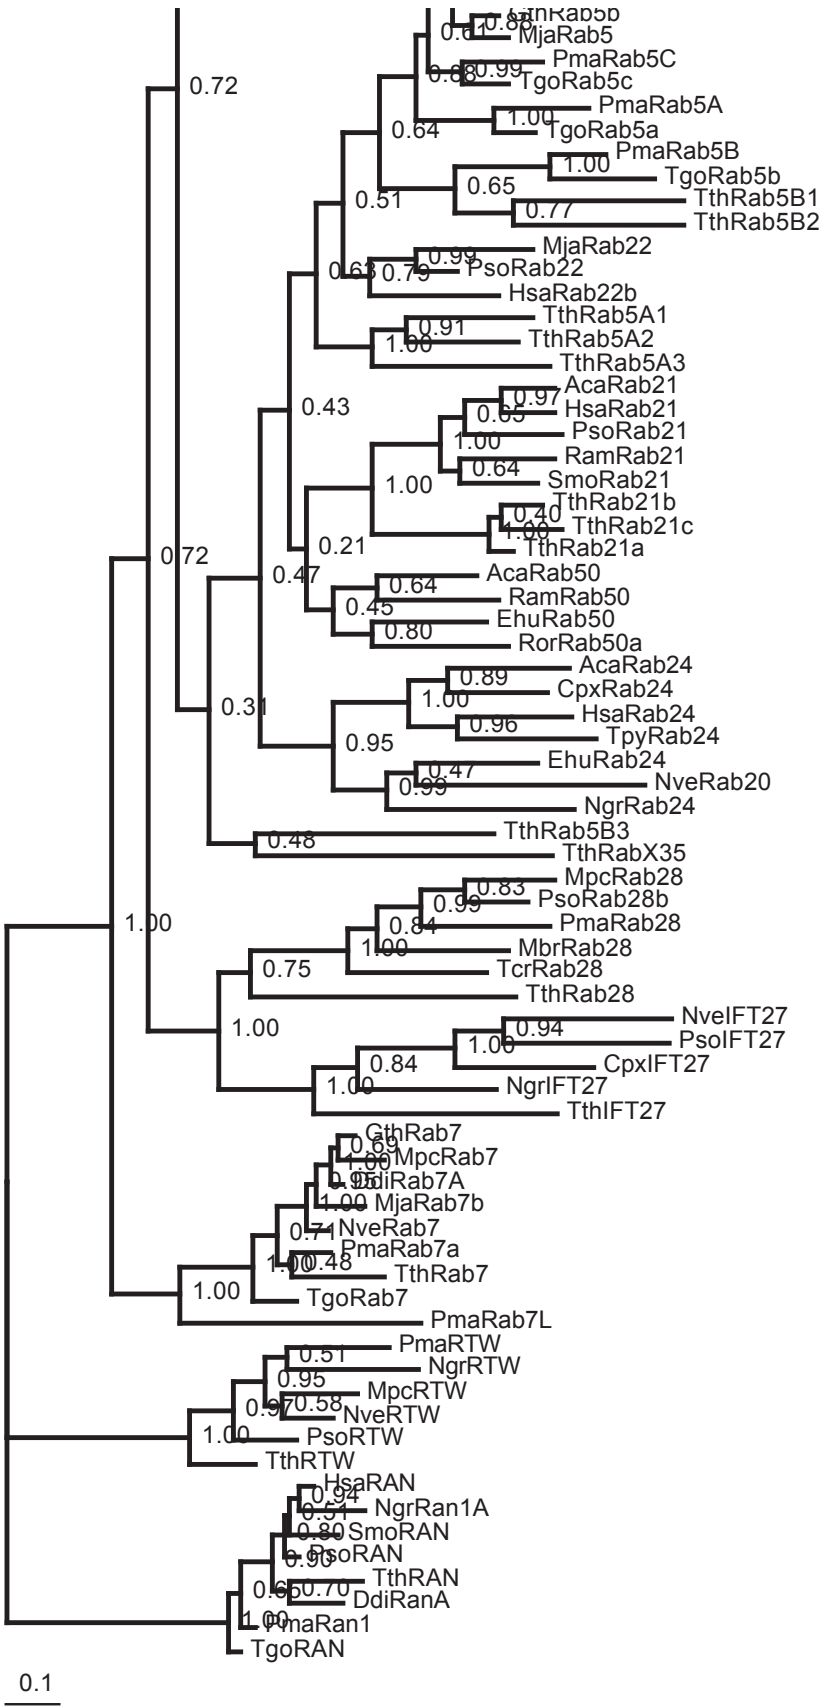

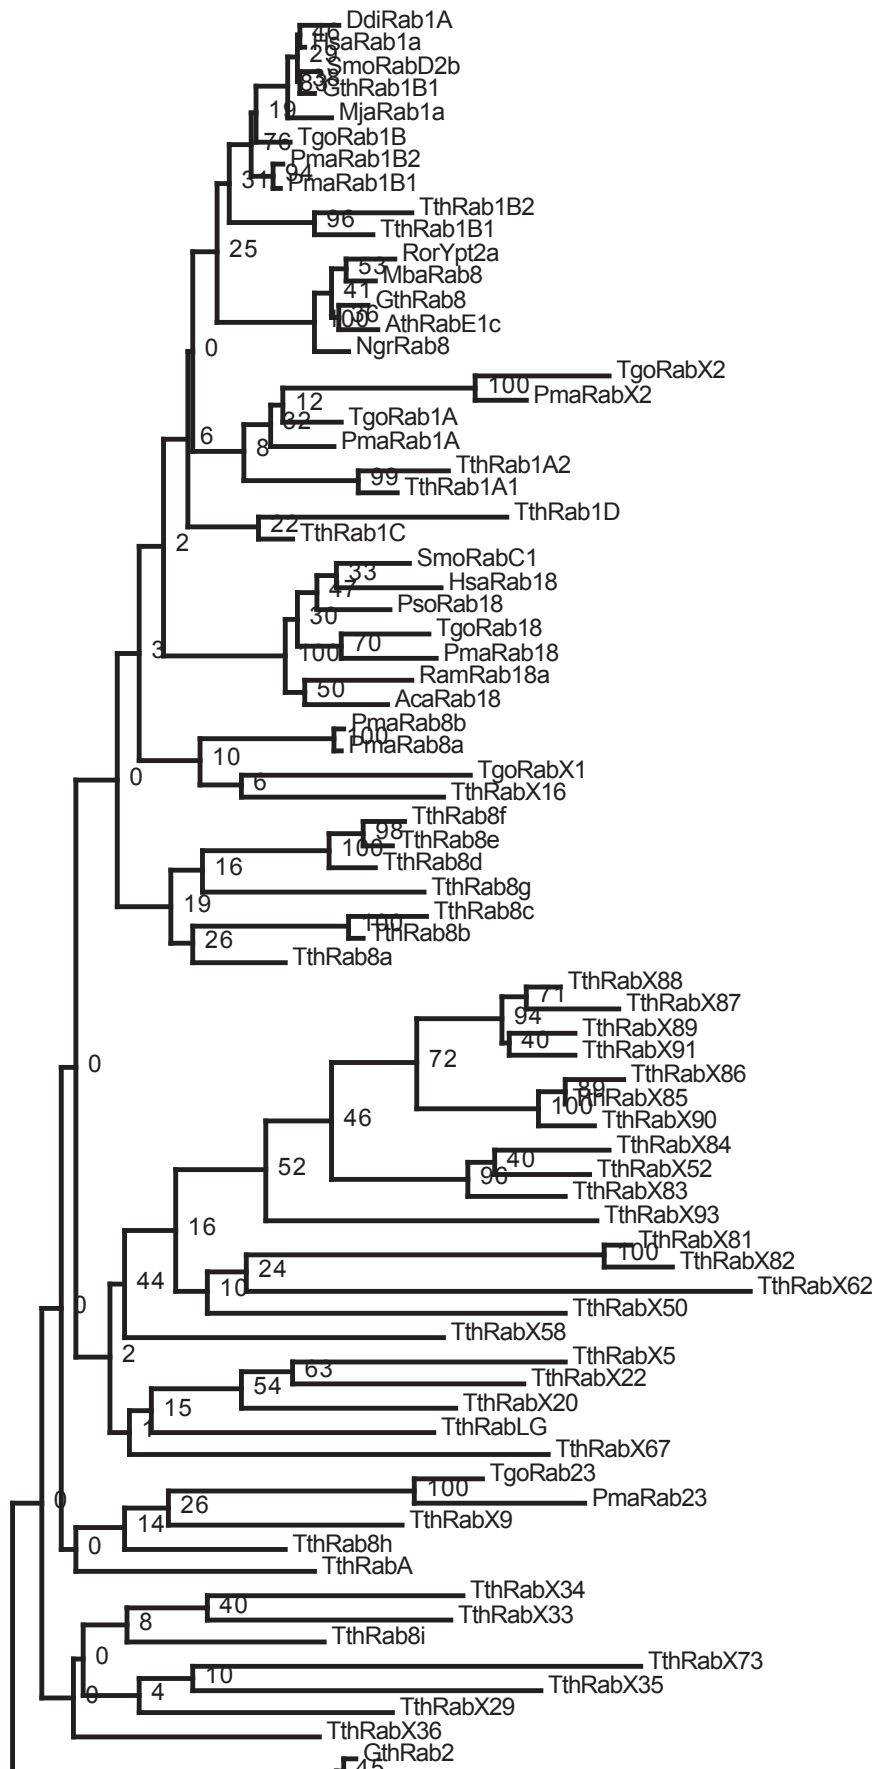

Elias et. al. Figure S7: PhyML\_page1

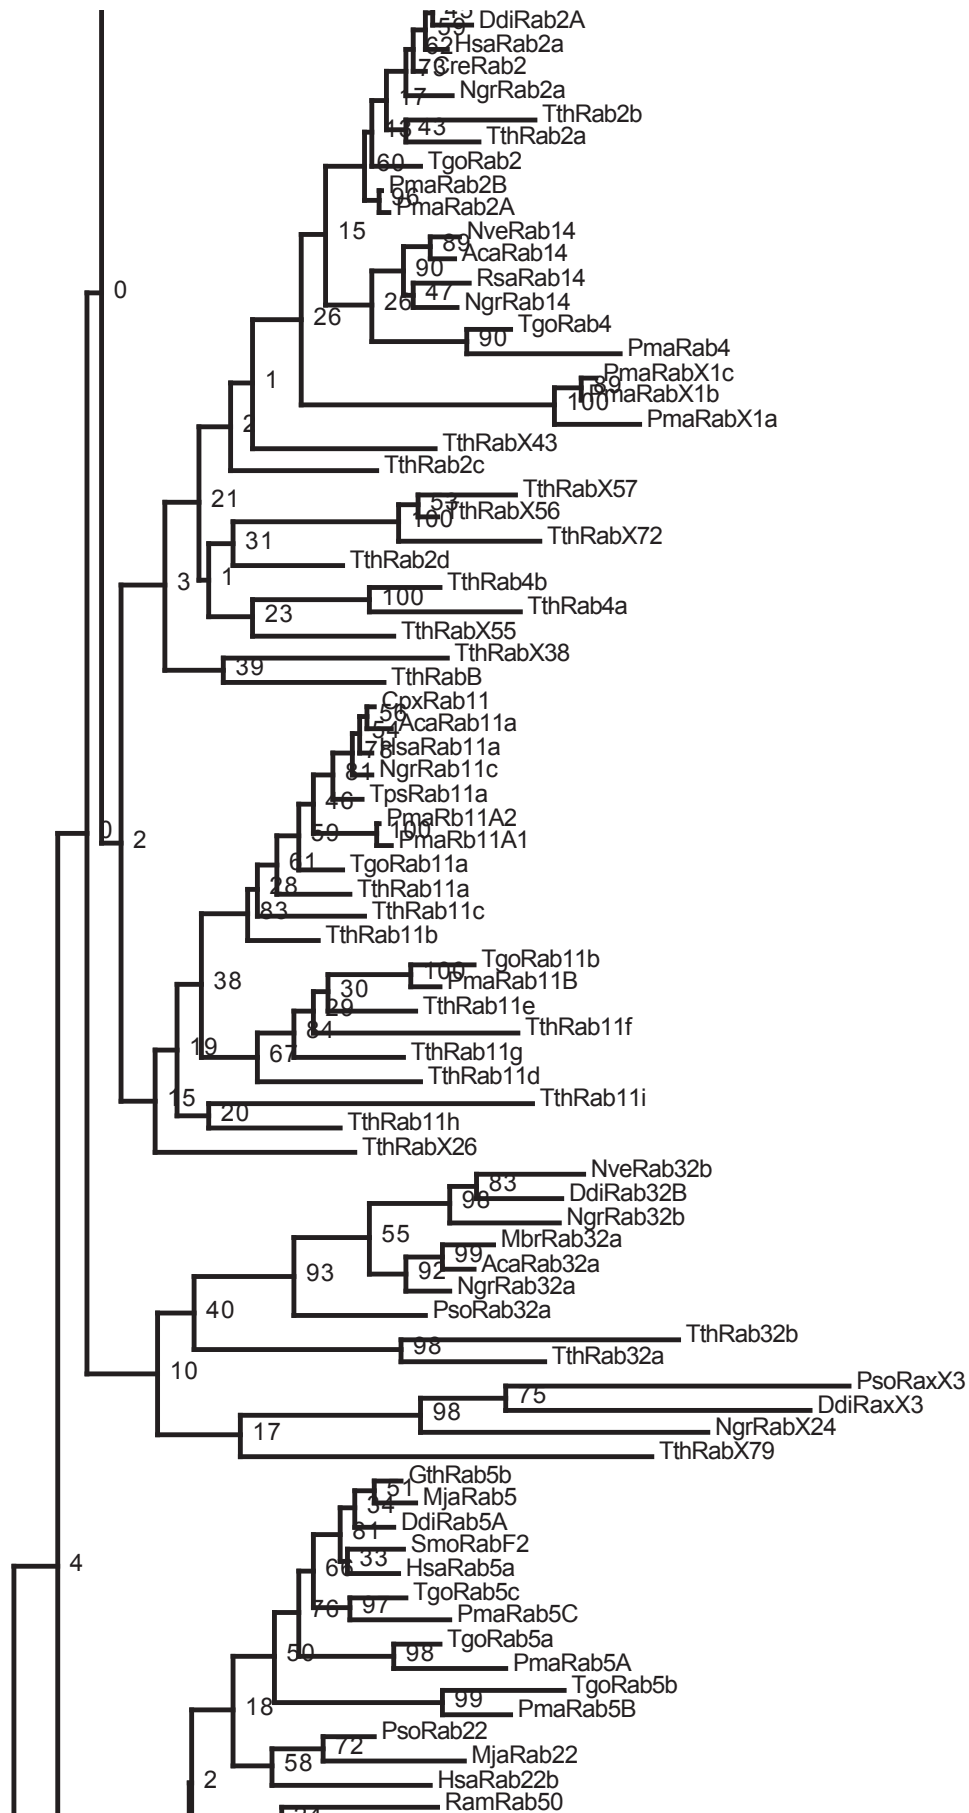

Elias et. al. Figure S7: PhyML\_page2

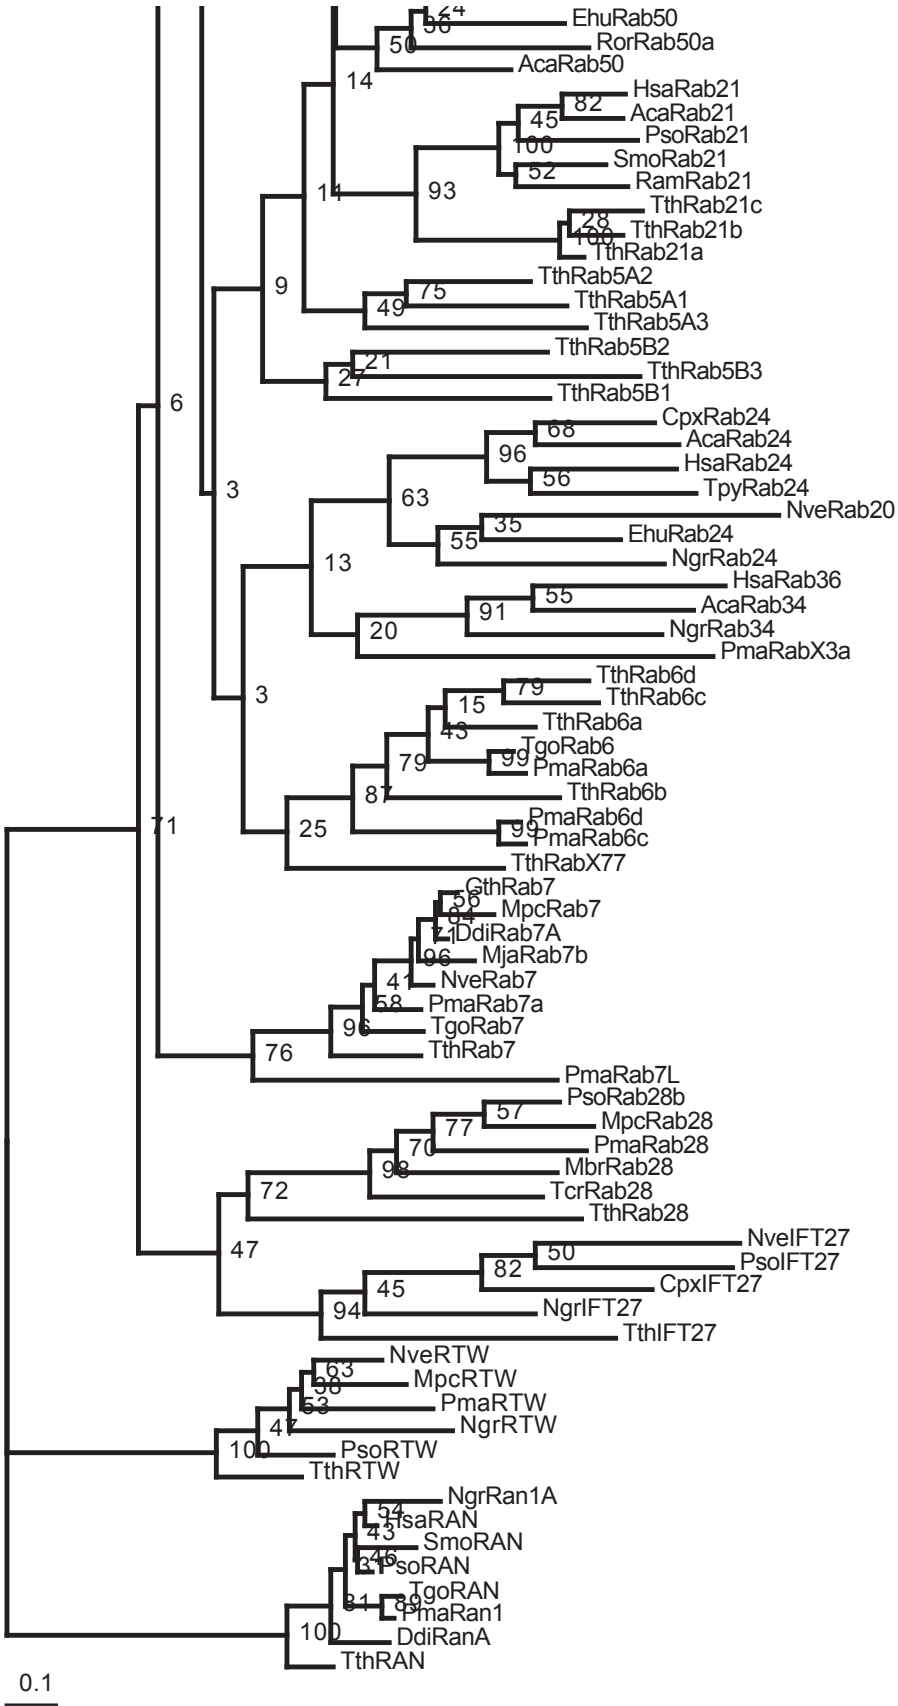

Elias et. al. Figure S7: PhyML\_page3

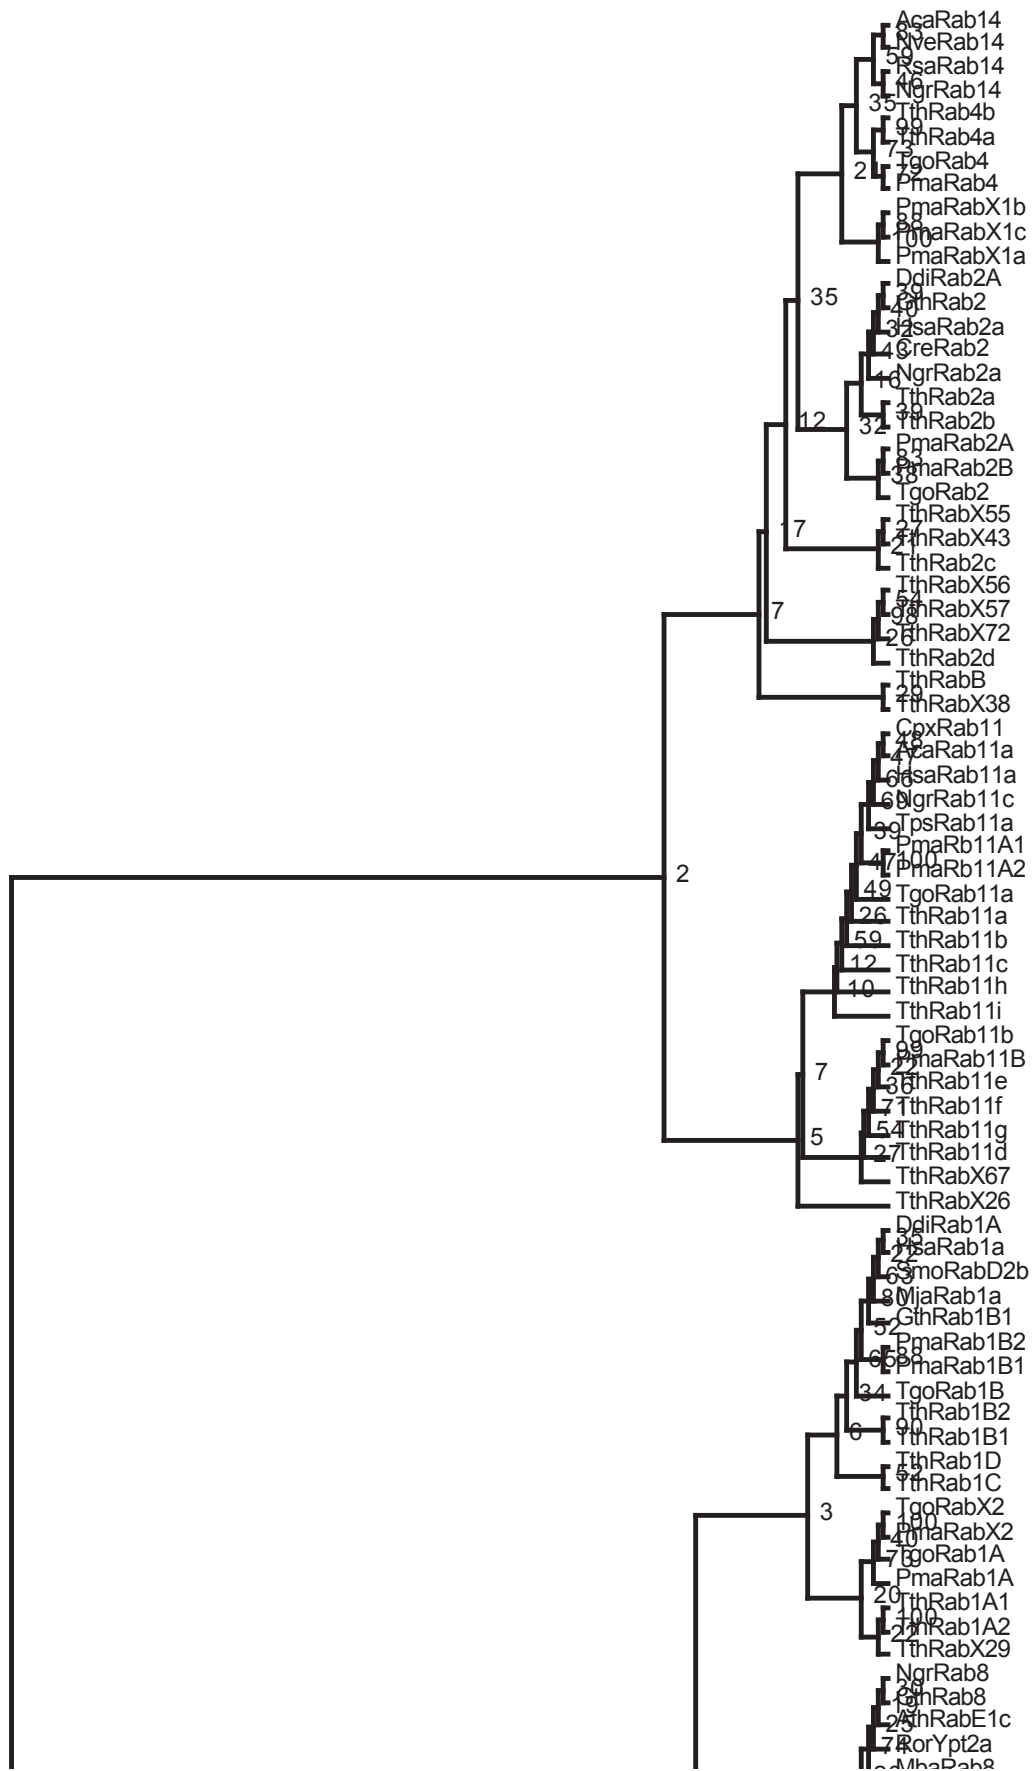

Elias et. al. Figure S7: RAxML\_page1

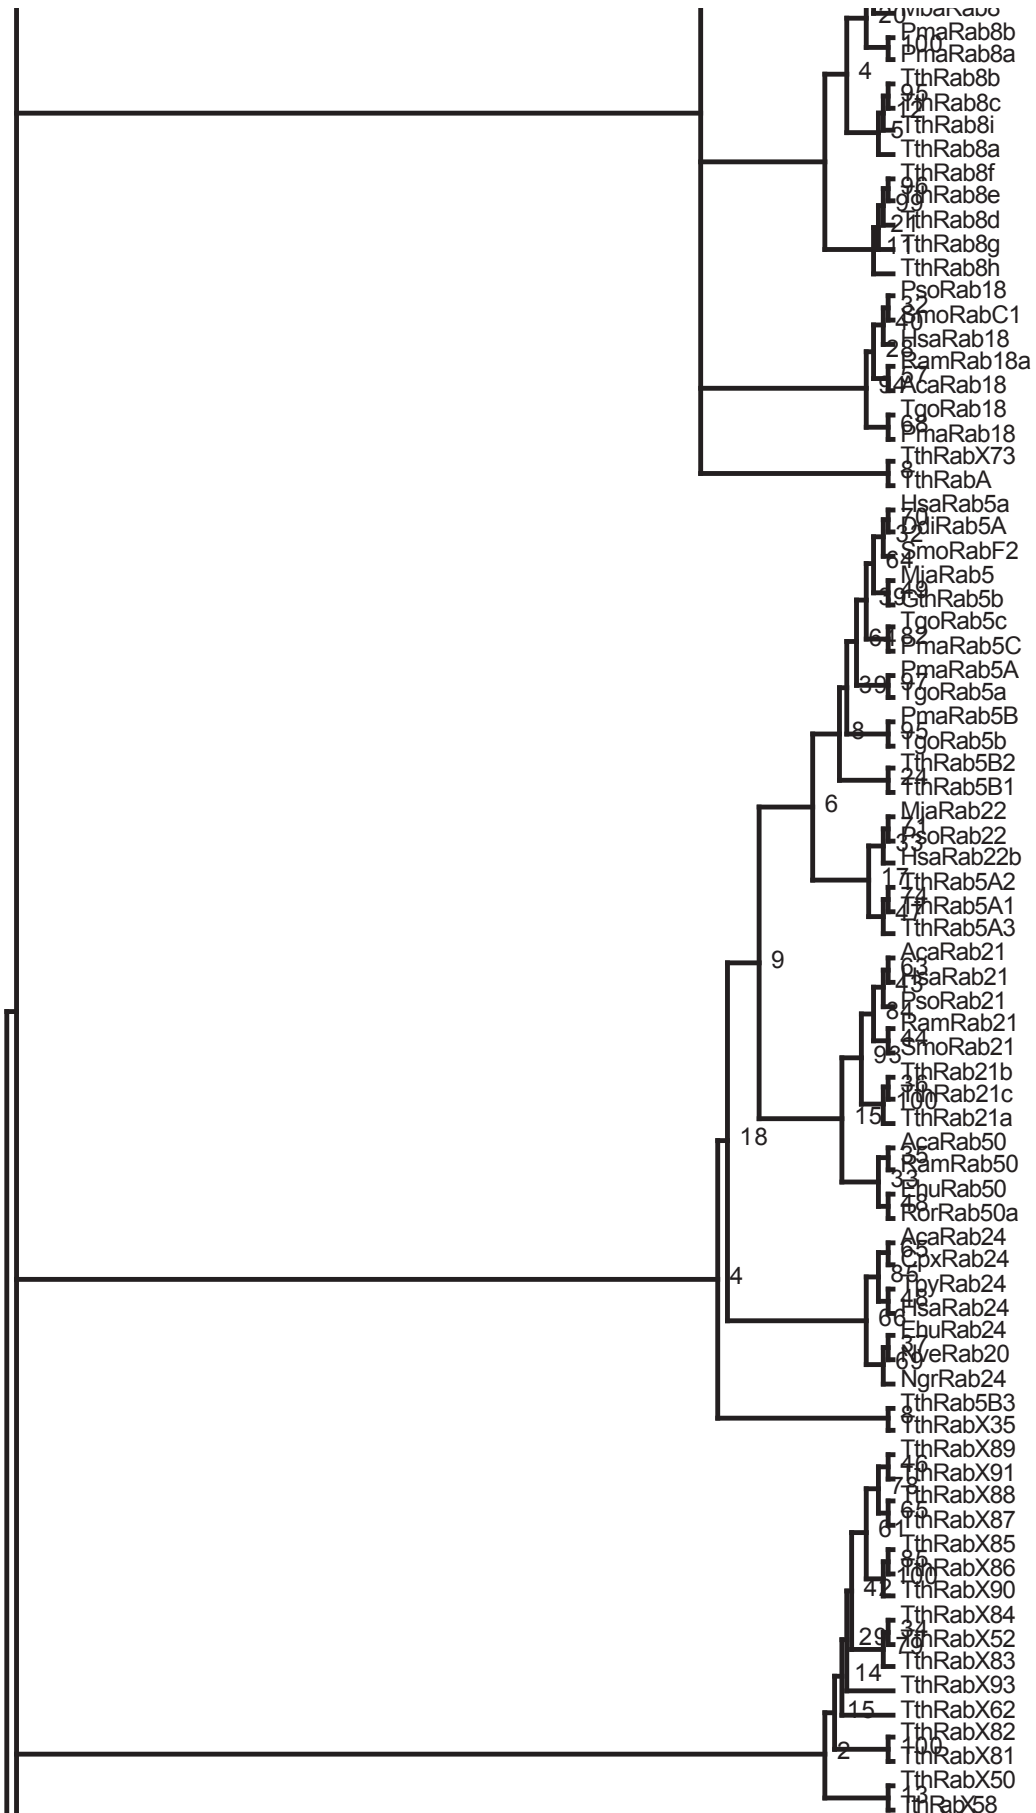



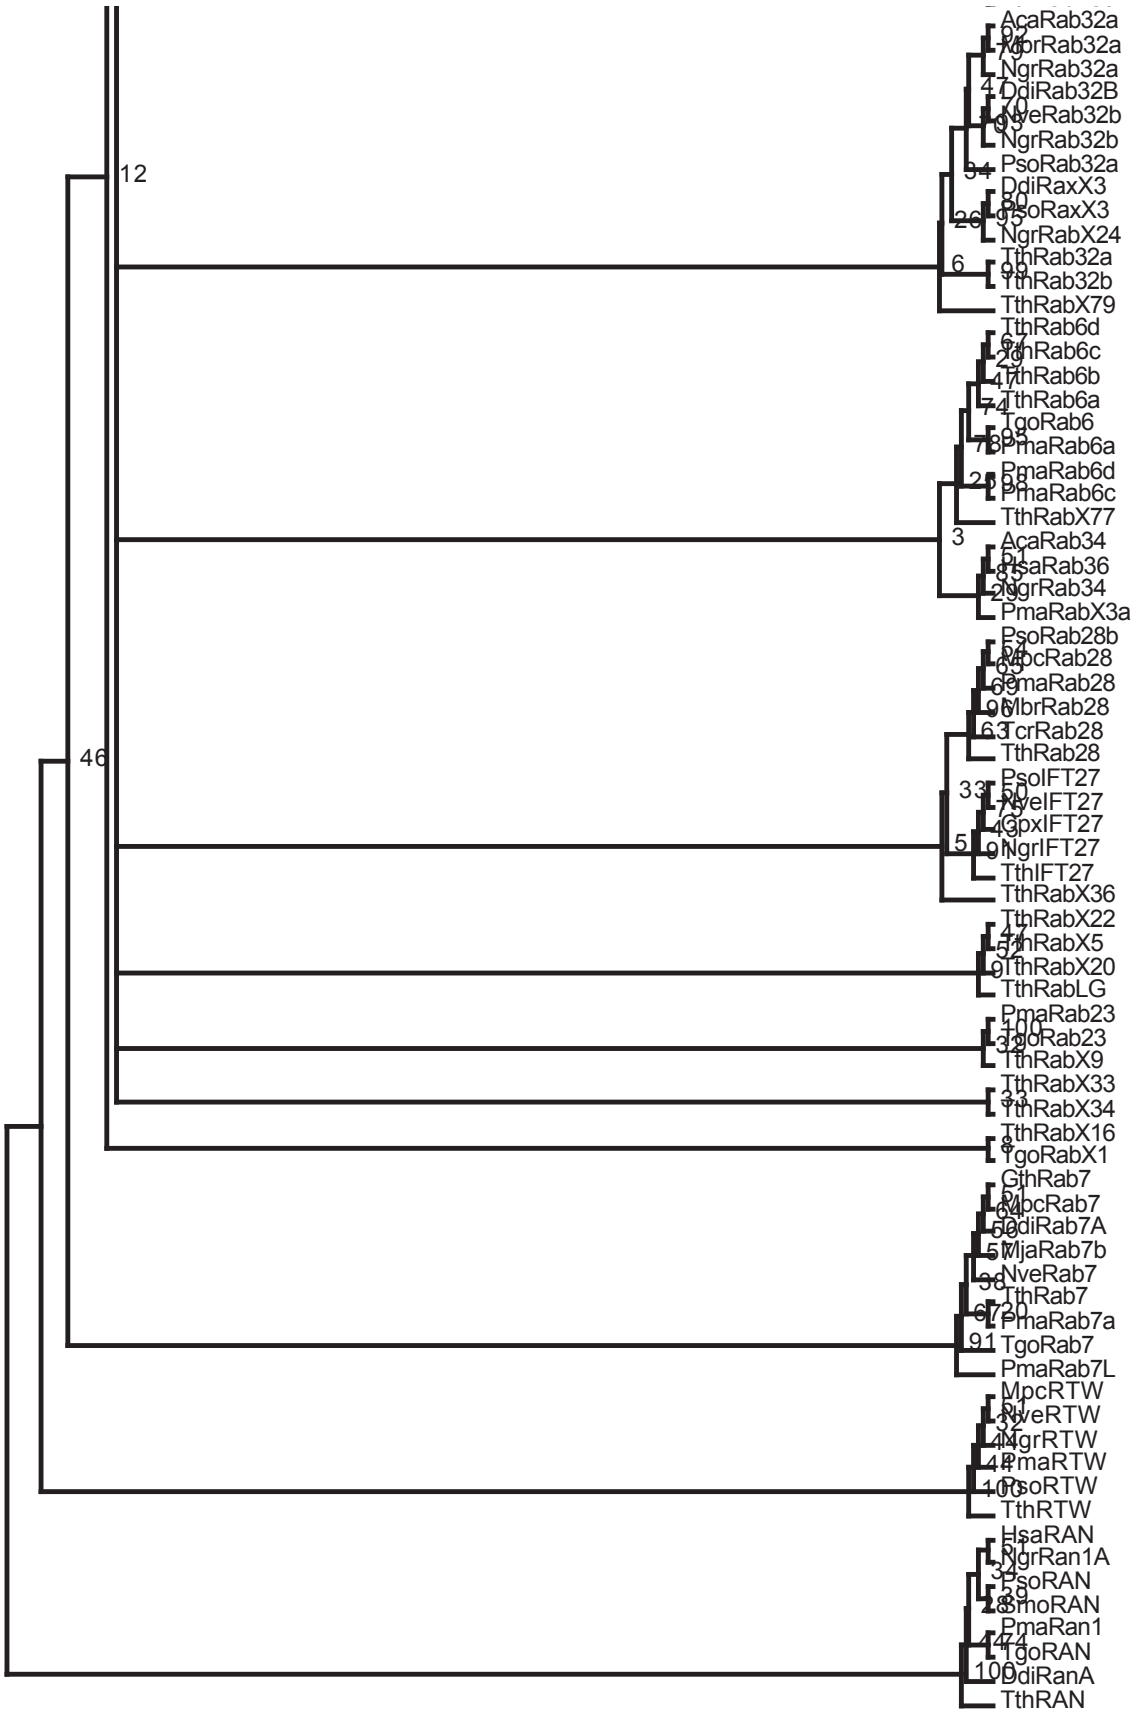

Supplement: supp_125.10.2500_JCS101378FigS7.pdf [file supp_125.10.2500_JCS101378FigS7.pdf]
