# Supplementary material
Source: PubMed Central journal article supplement (PMC3383260)

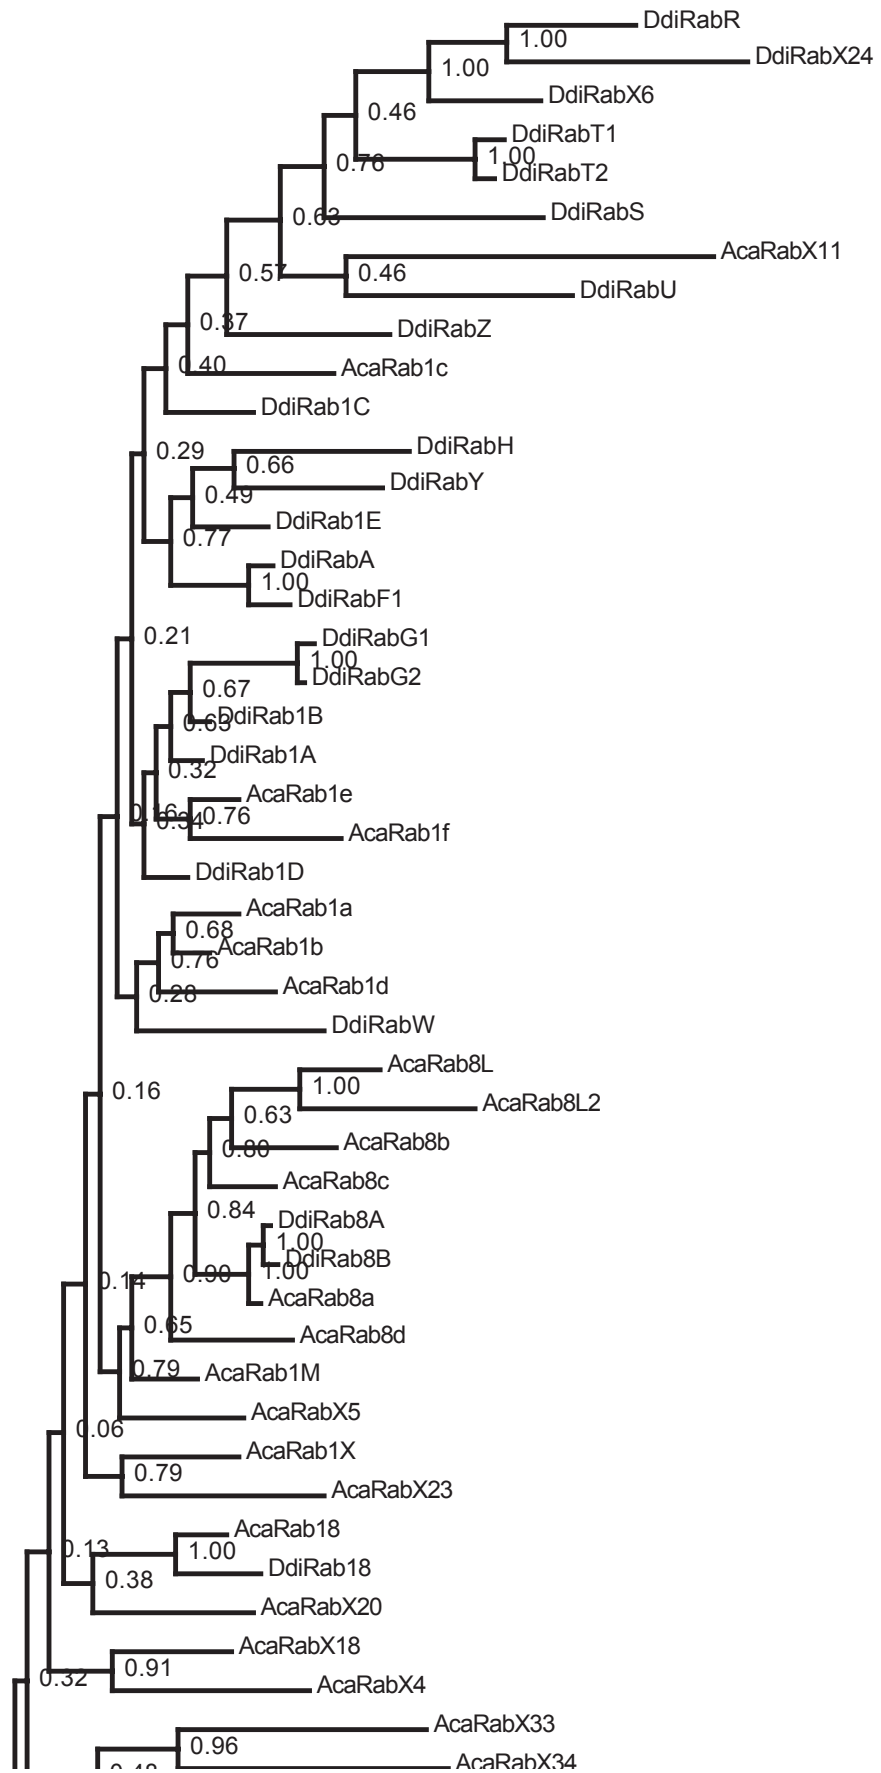

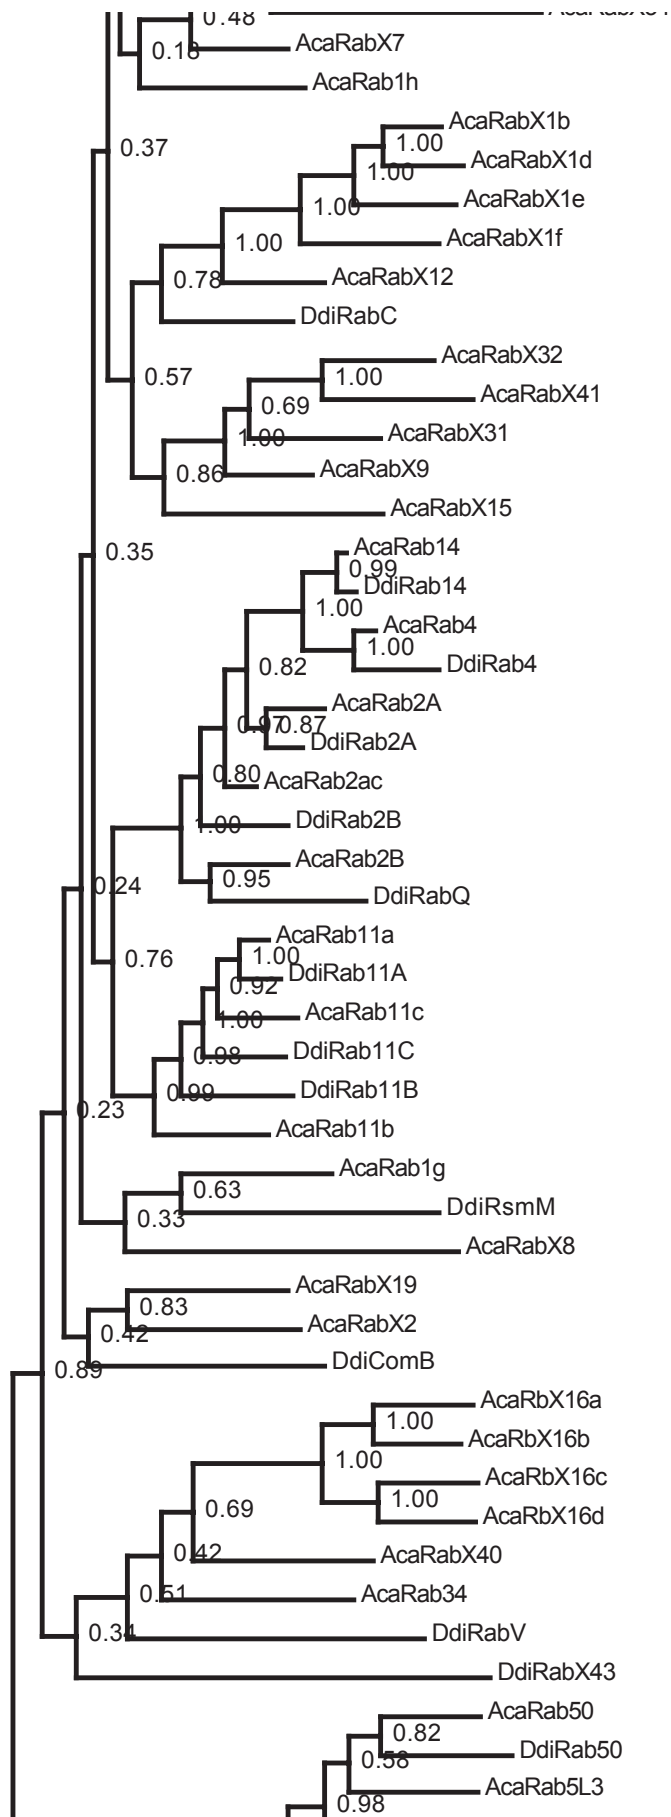

Elias et. al. Figure S9: MB\_page2

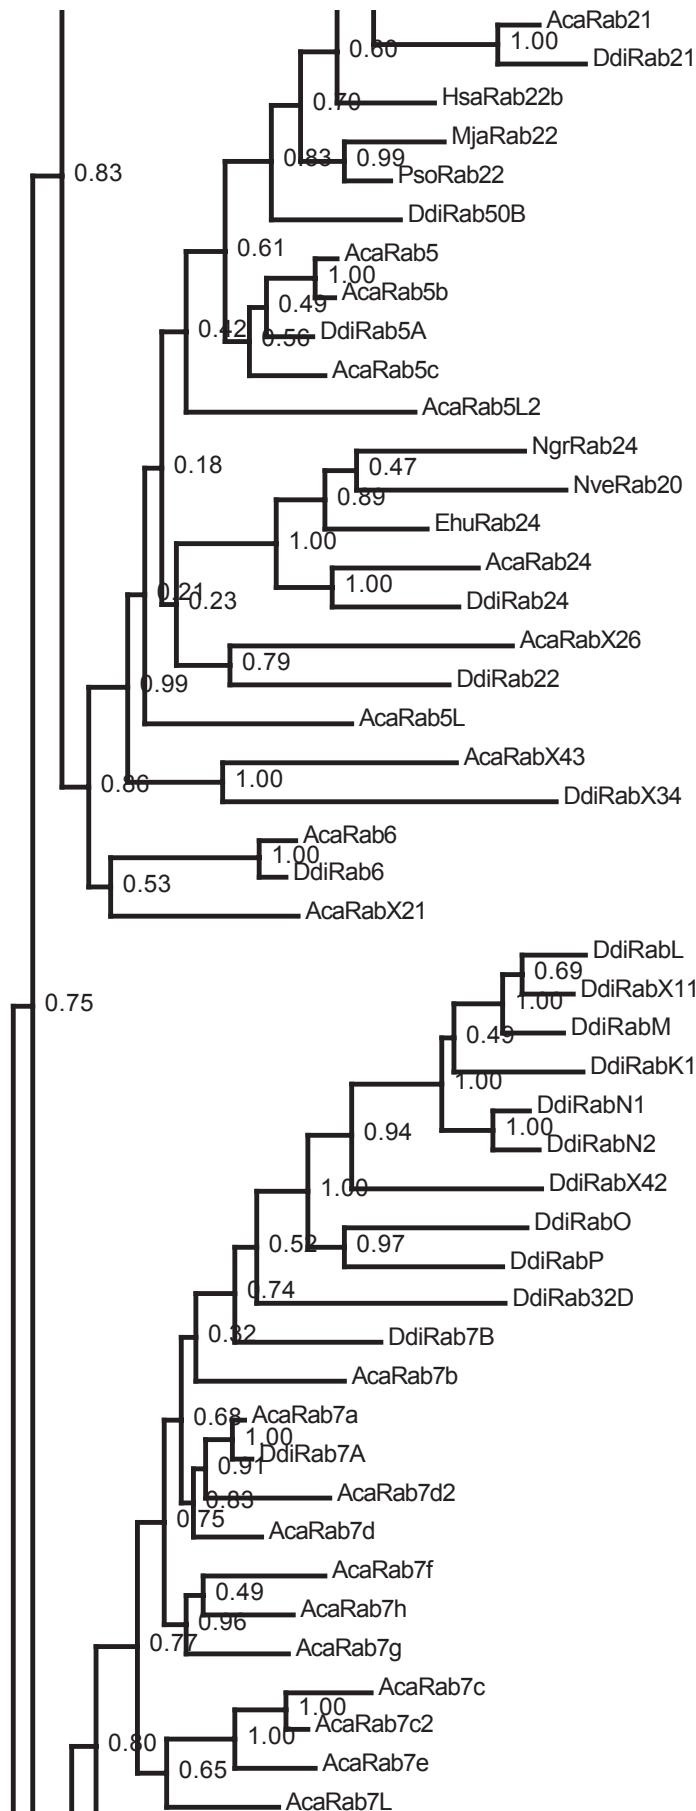

Elias et. al. Figure S9: MB\_page3

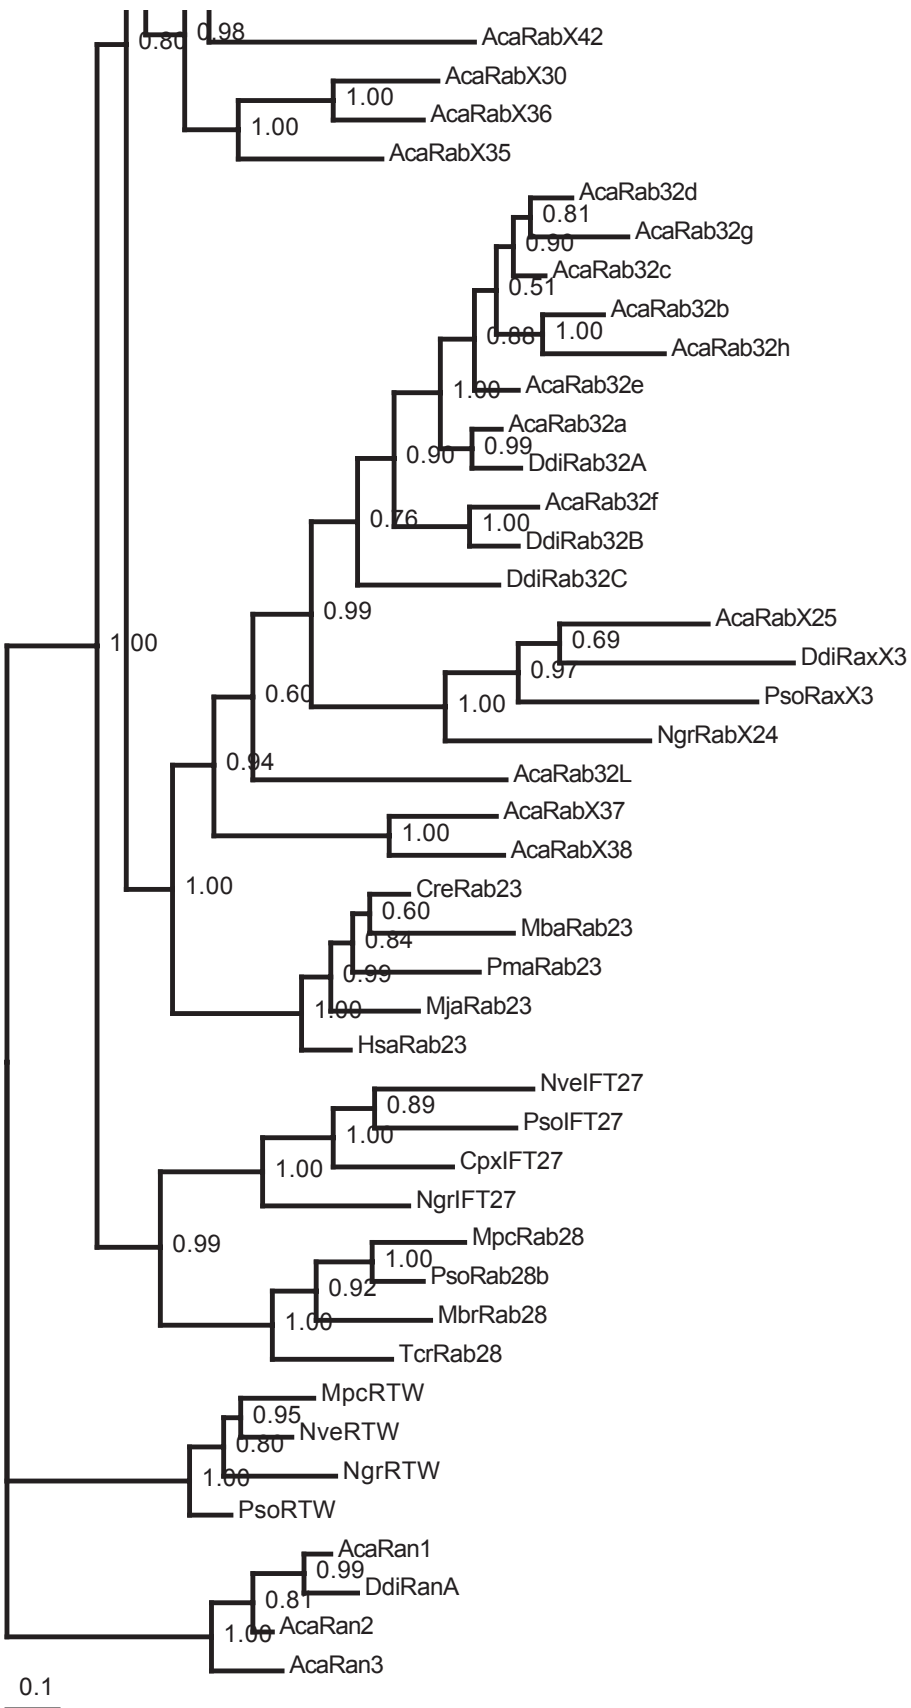

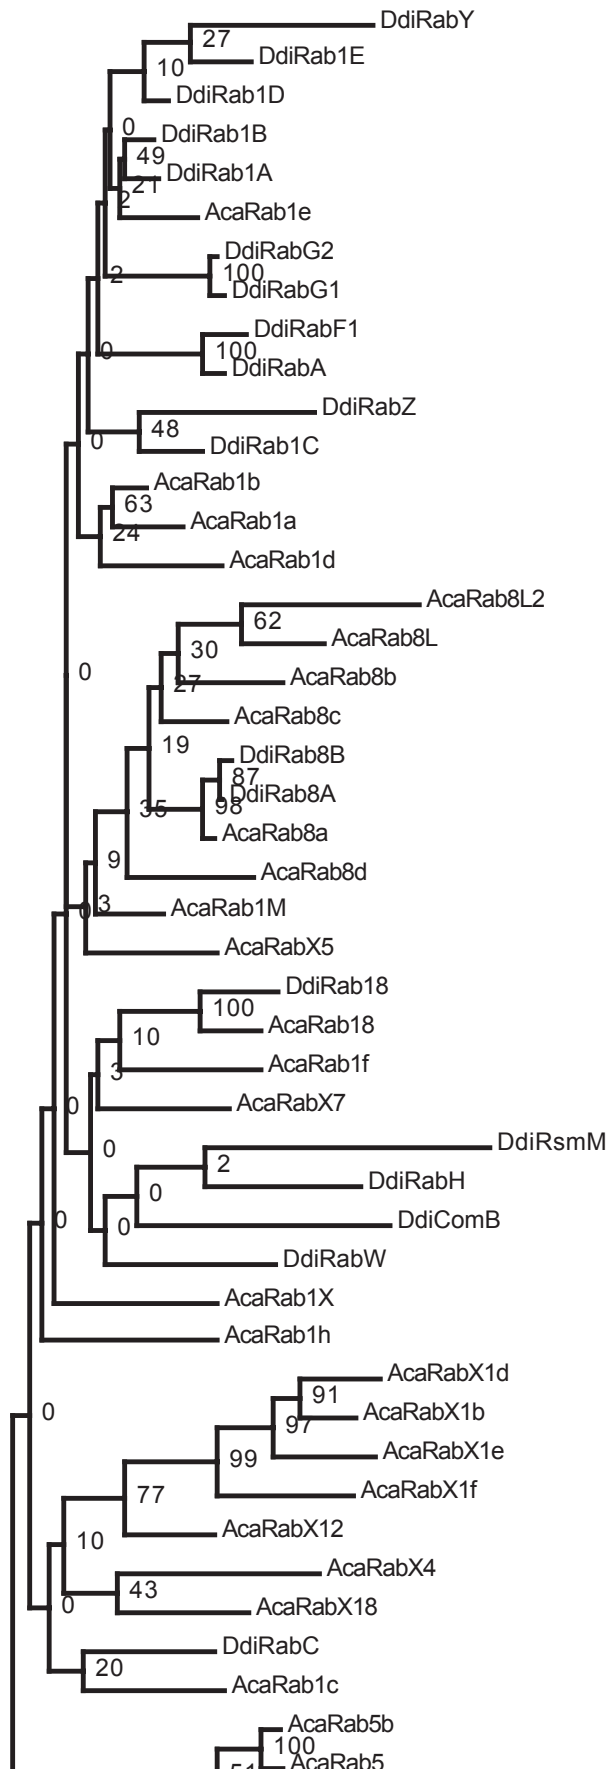

Elias et. al. Figure S9: PhyML\_page1

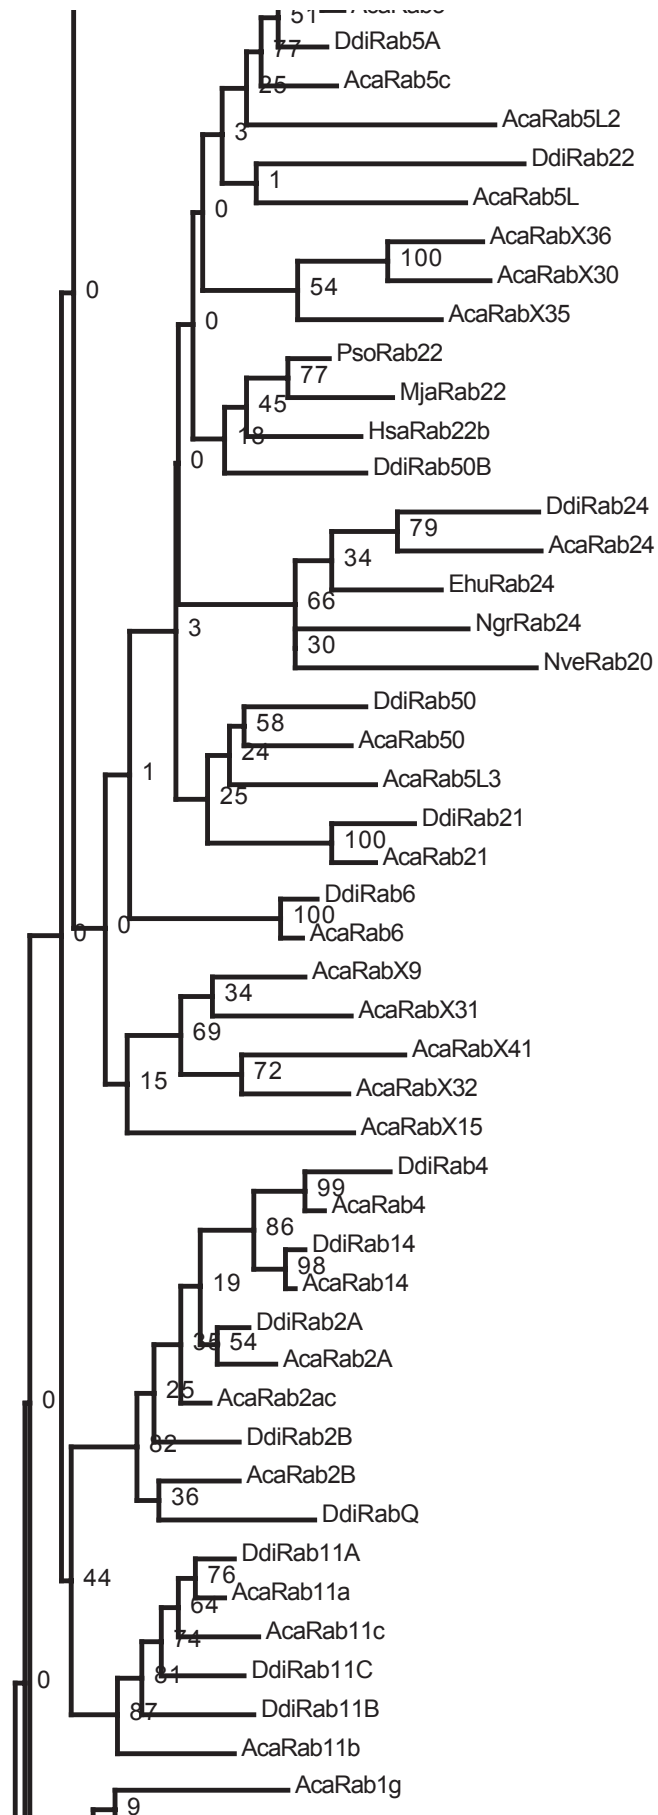

Elias et. al. Figure S9: PhyML\_page2

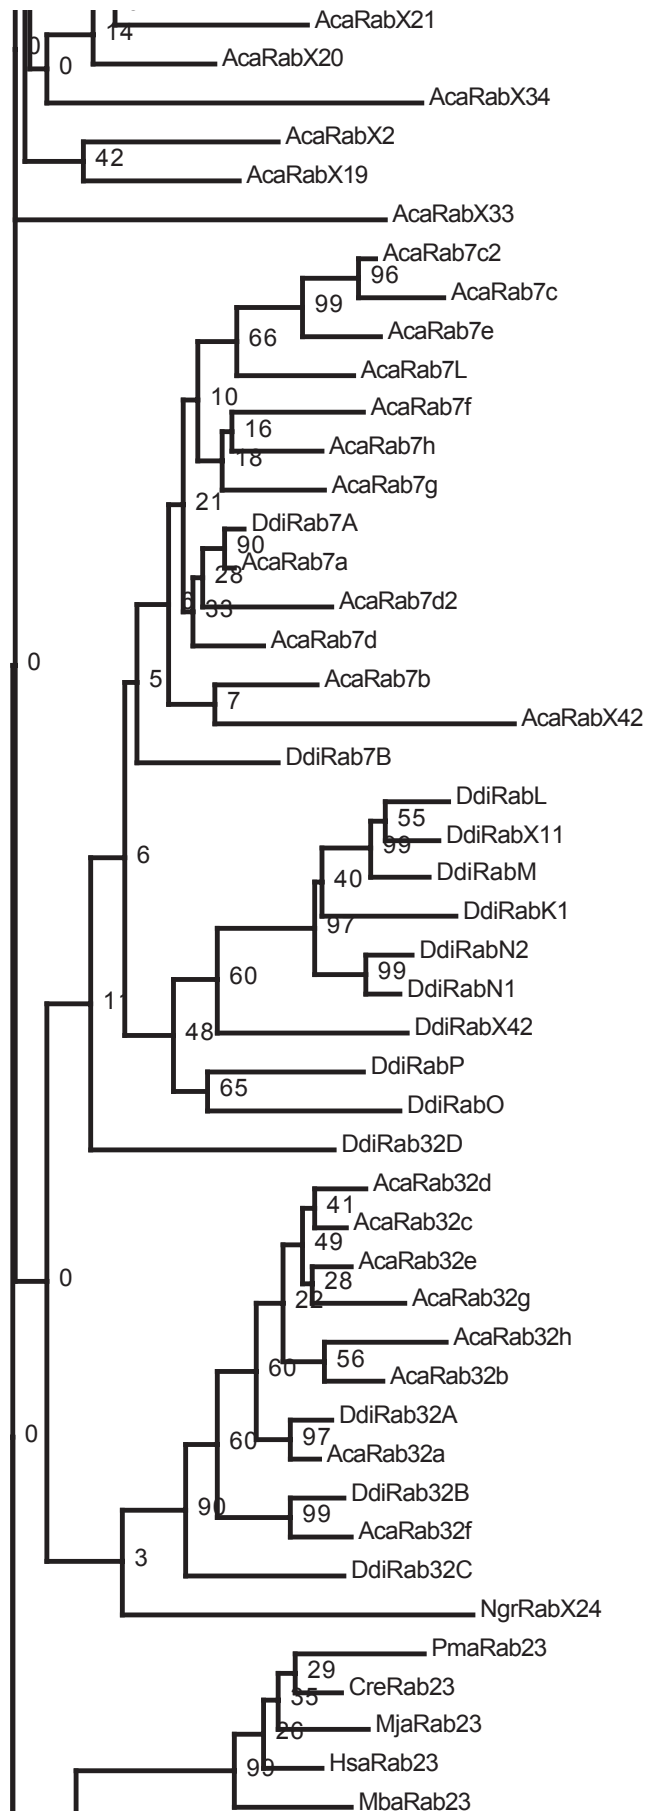

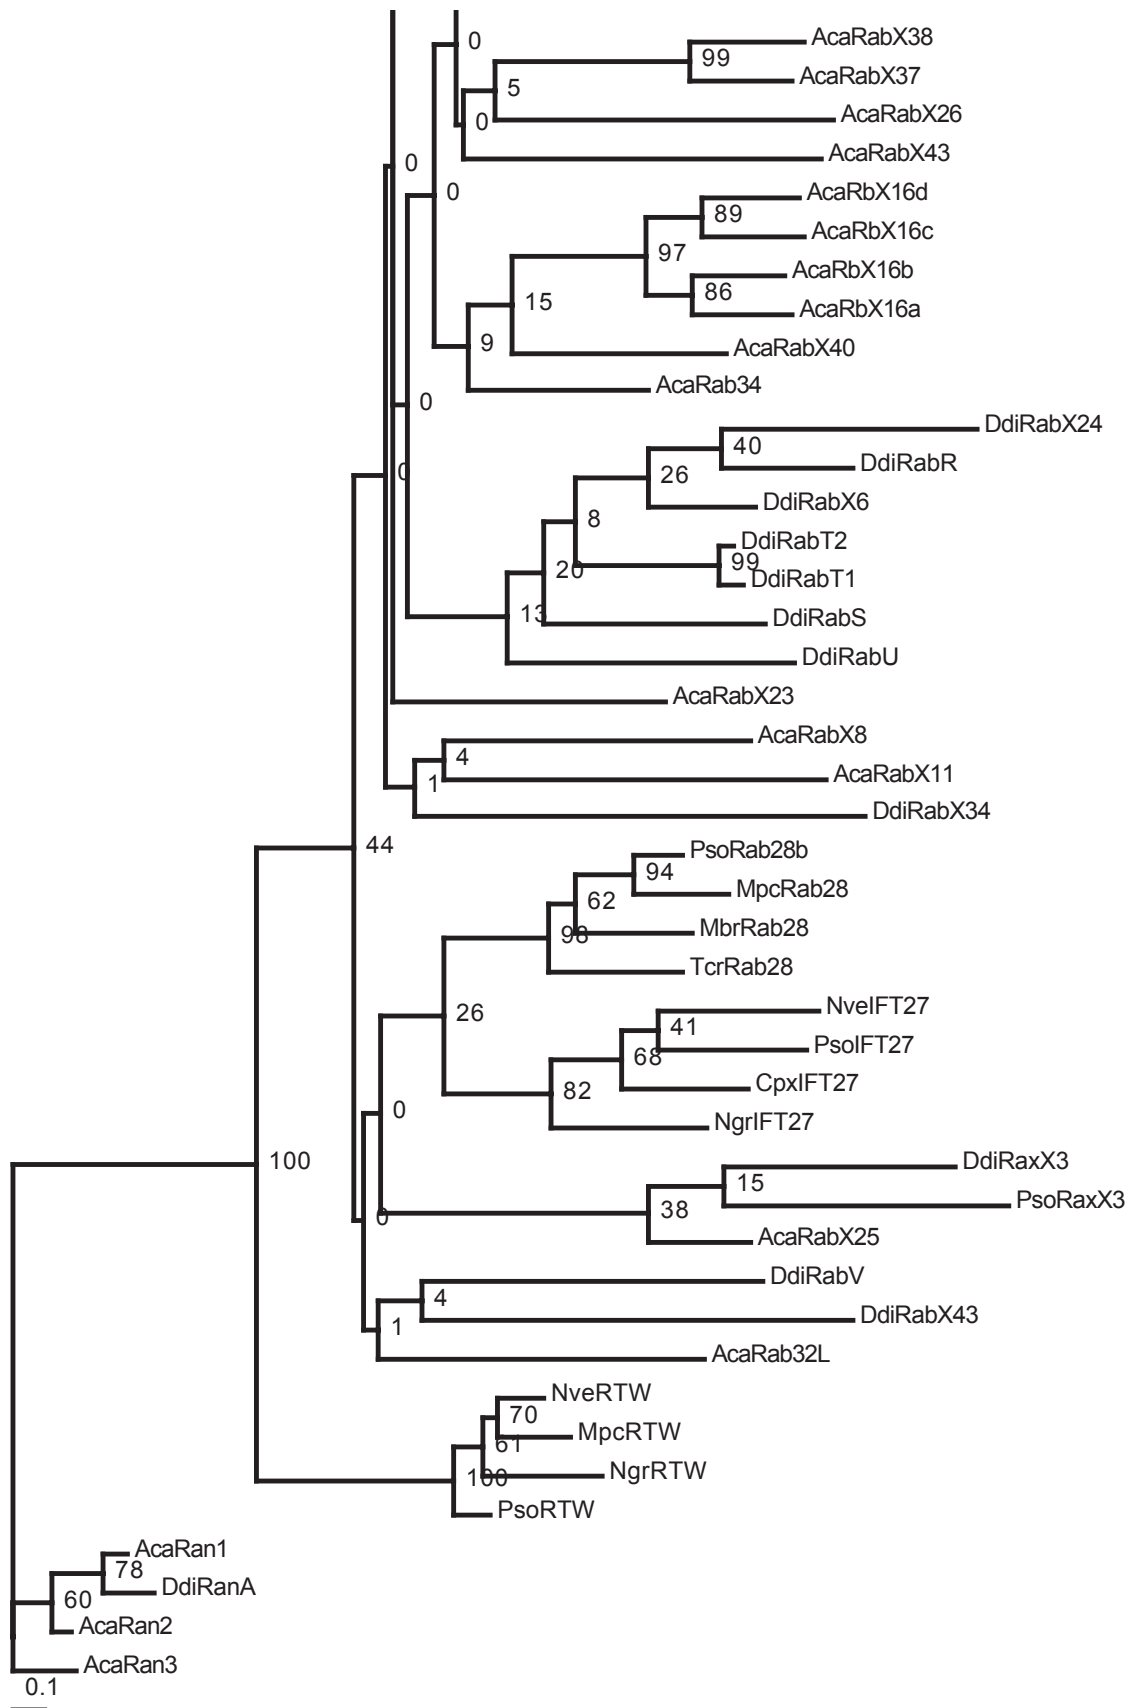

Elias et. al. Figure S9: PhyML\_page4



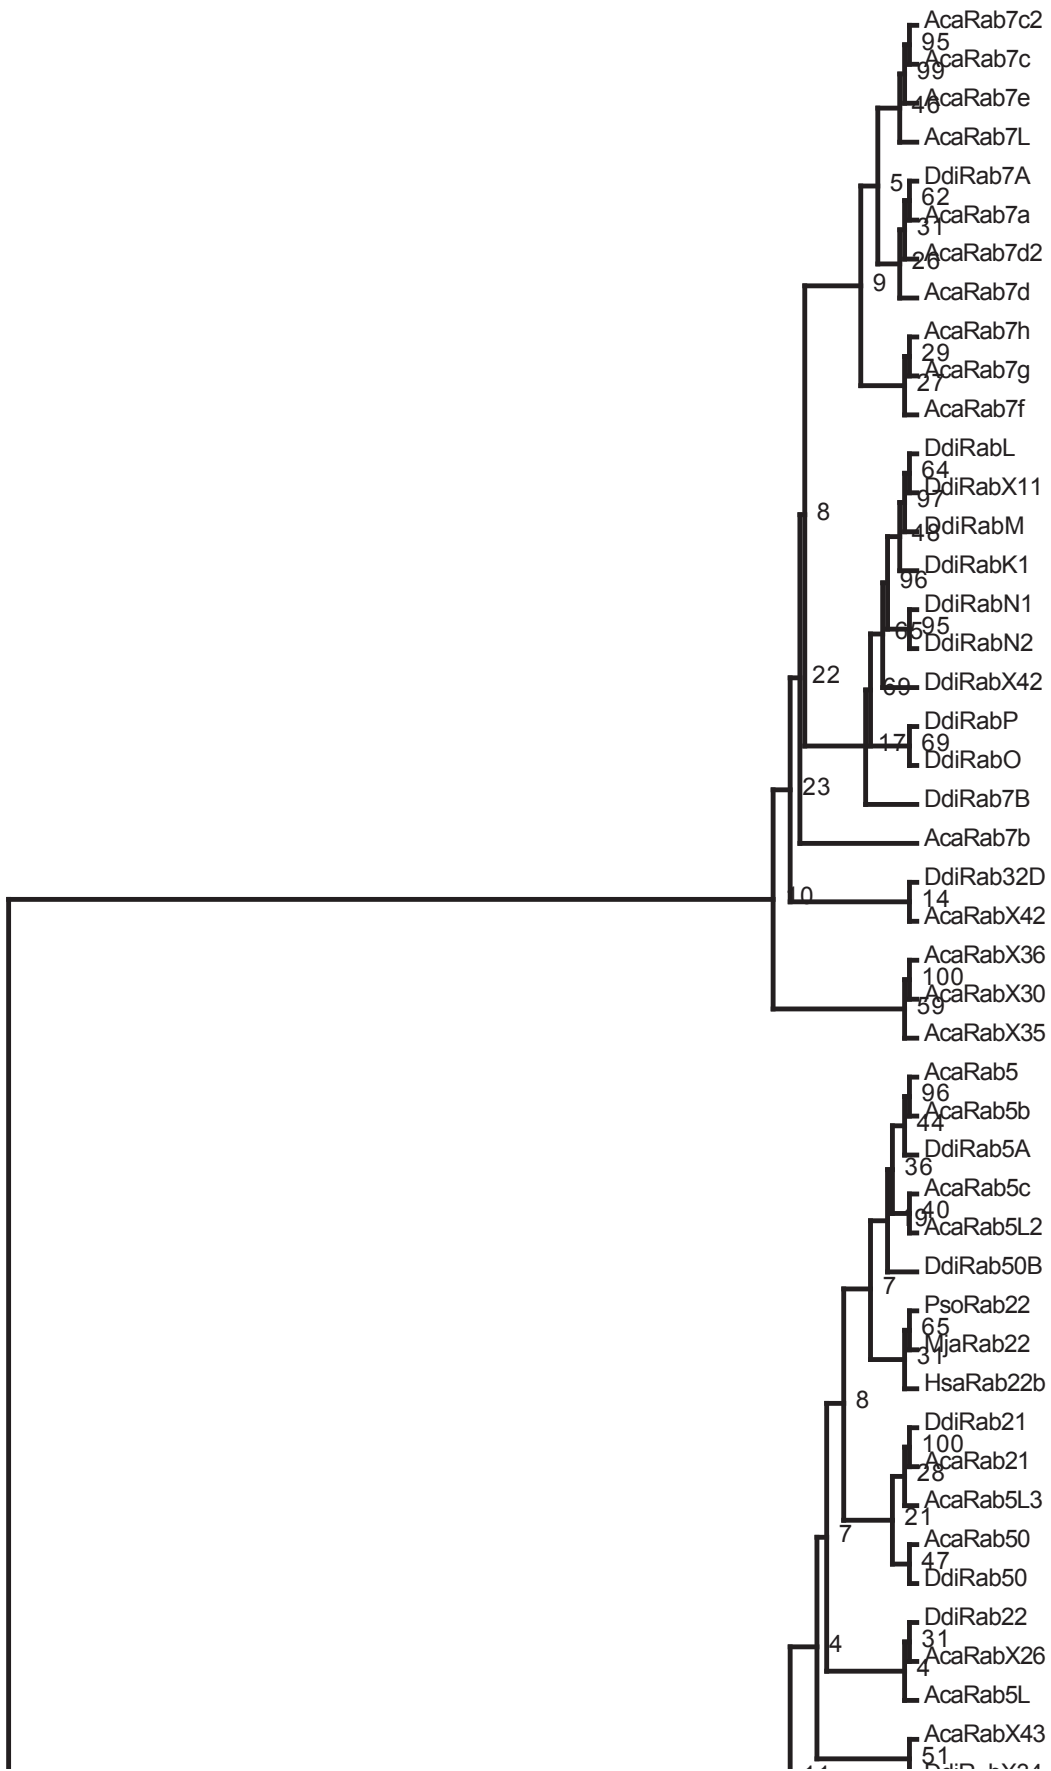

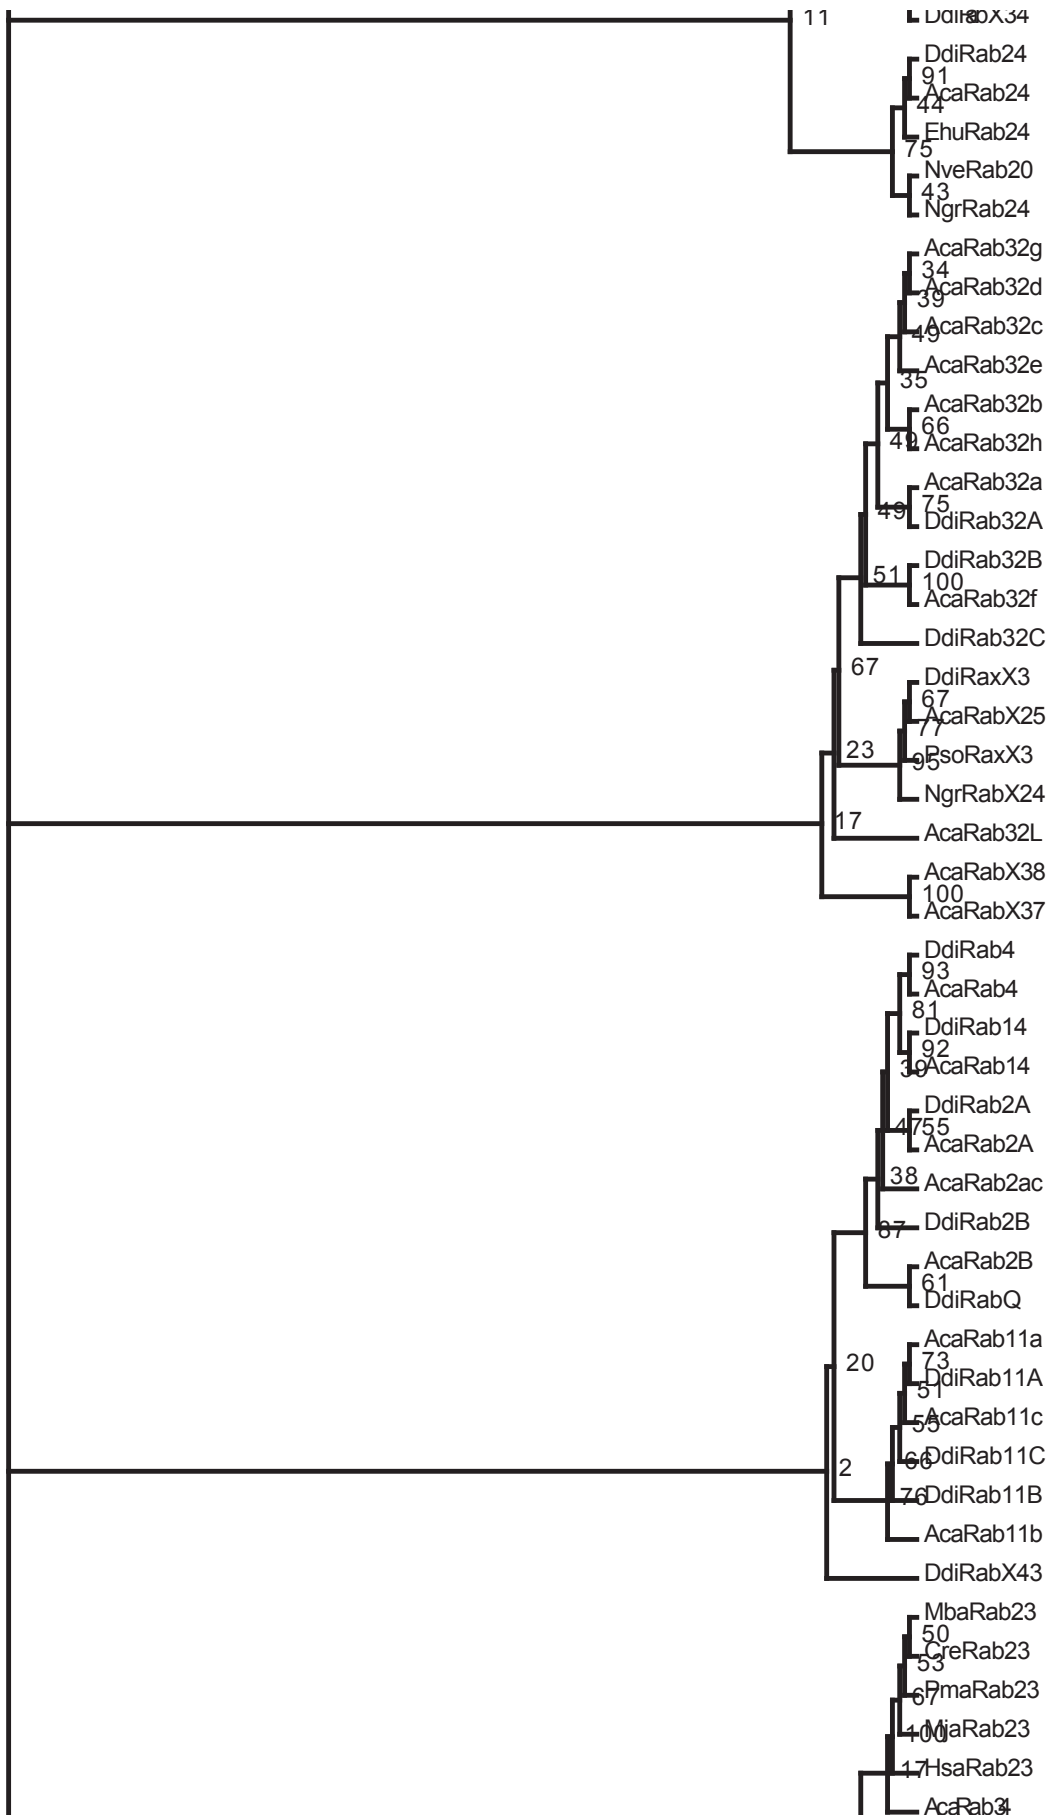

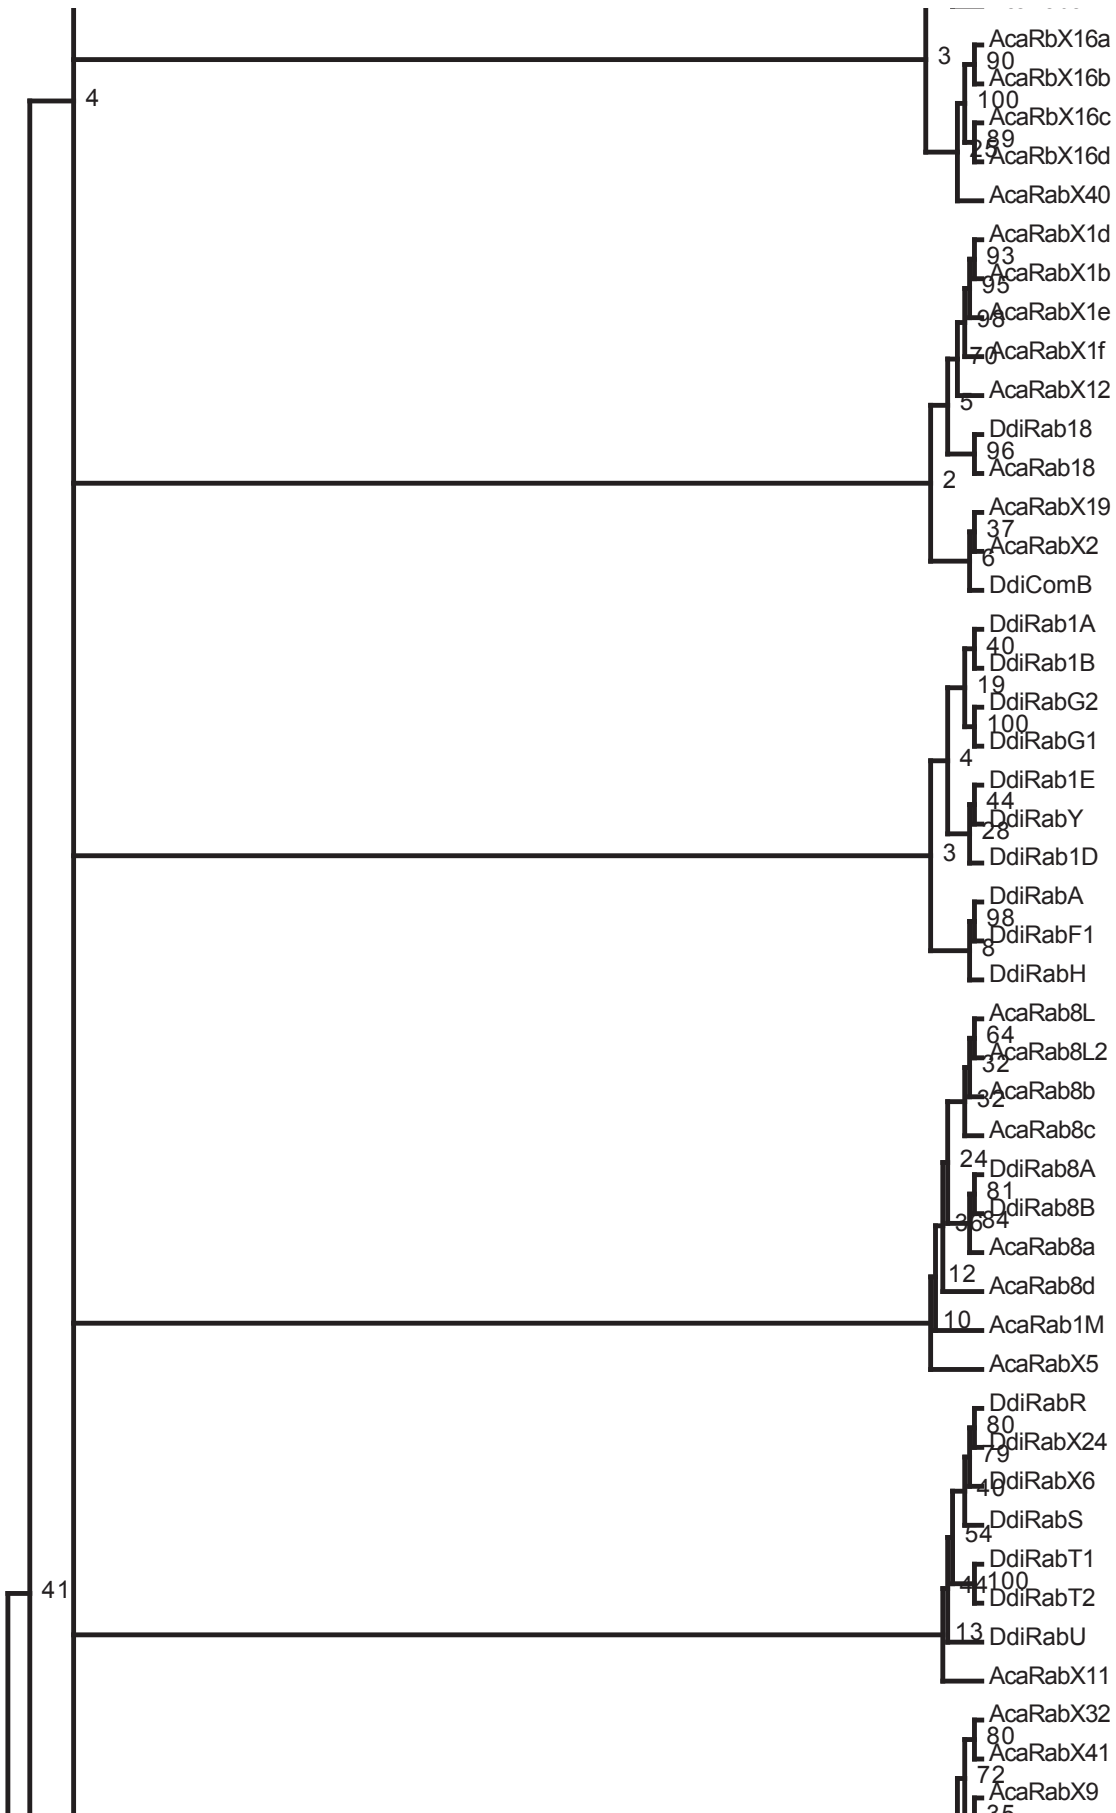

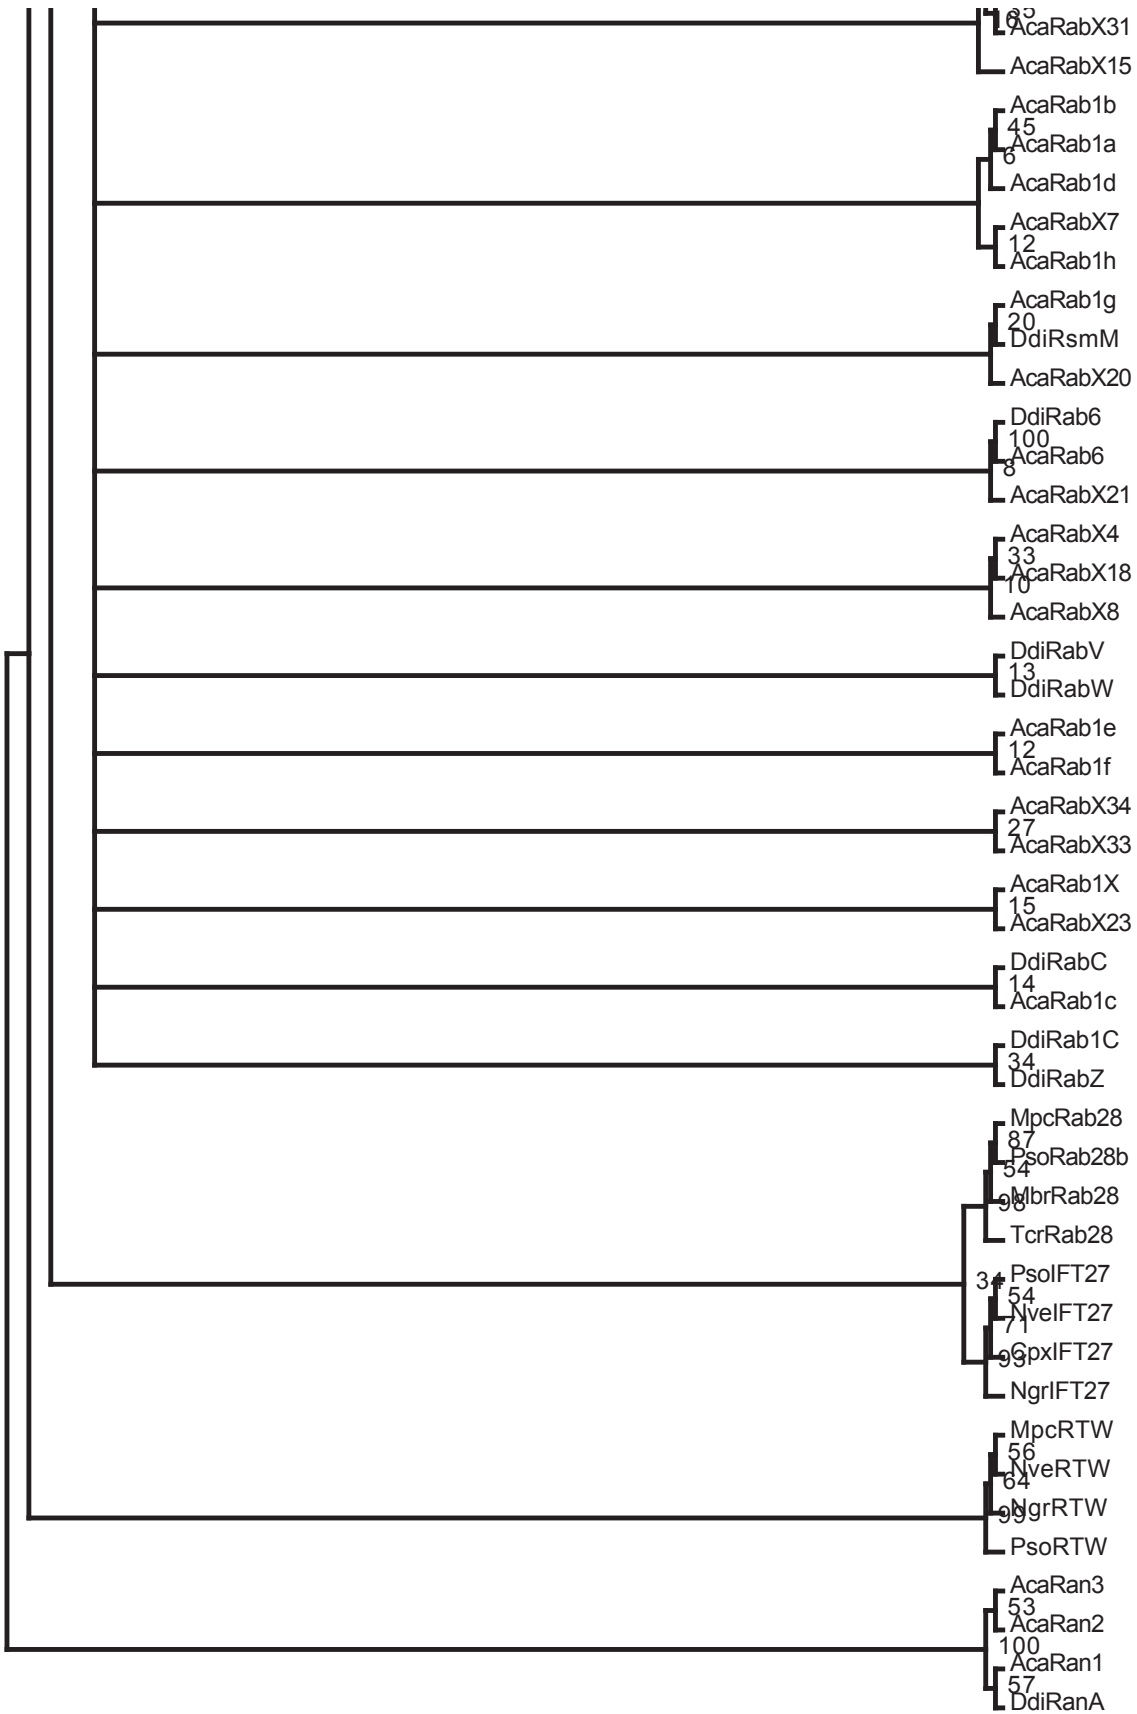

Supplement: supp_125.10.2500_JCS101378FigS9.pdf [file supp_125.10.2500_JCS101378FigS9.pdf]
