# Supplementary material
Source: PubMed Central journal article supplement (PMC3383260)

*Phytophthora sojae*

*Hyaloperonospora arabidopsidis*

*Ectocarpus siliculosus*

*Naegleria gruberi*

*Dictyostelium discoideum*

*Polysphondylium pallidum*

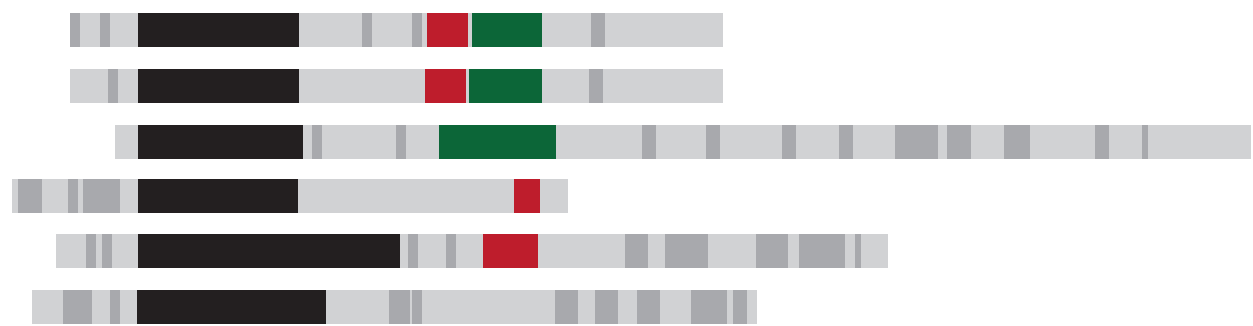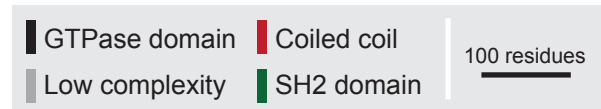

Supplement: supp_125.10.2500_JCS101378FigS17.pdf [file supp_125.10.2500_JCS101378FigS17.pdf]
