# Supplementary material
Source: PubMed Central journal article supplement (PMC3383260)
Supplement: supp_125.10.2500_JCS101378FigS18.pdf [file supp_125.10.2500_JCS101378FigS18.pdf]

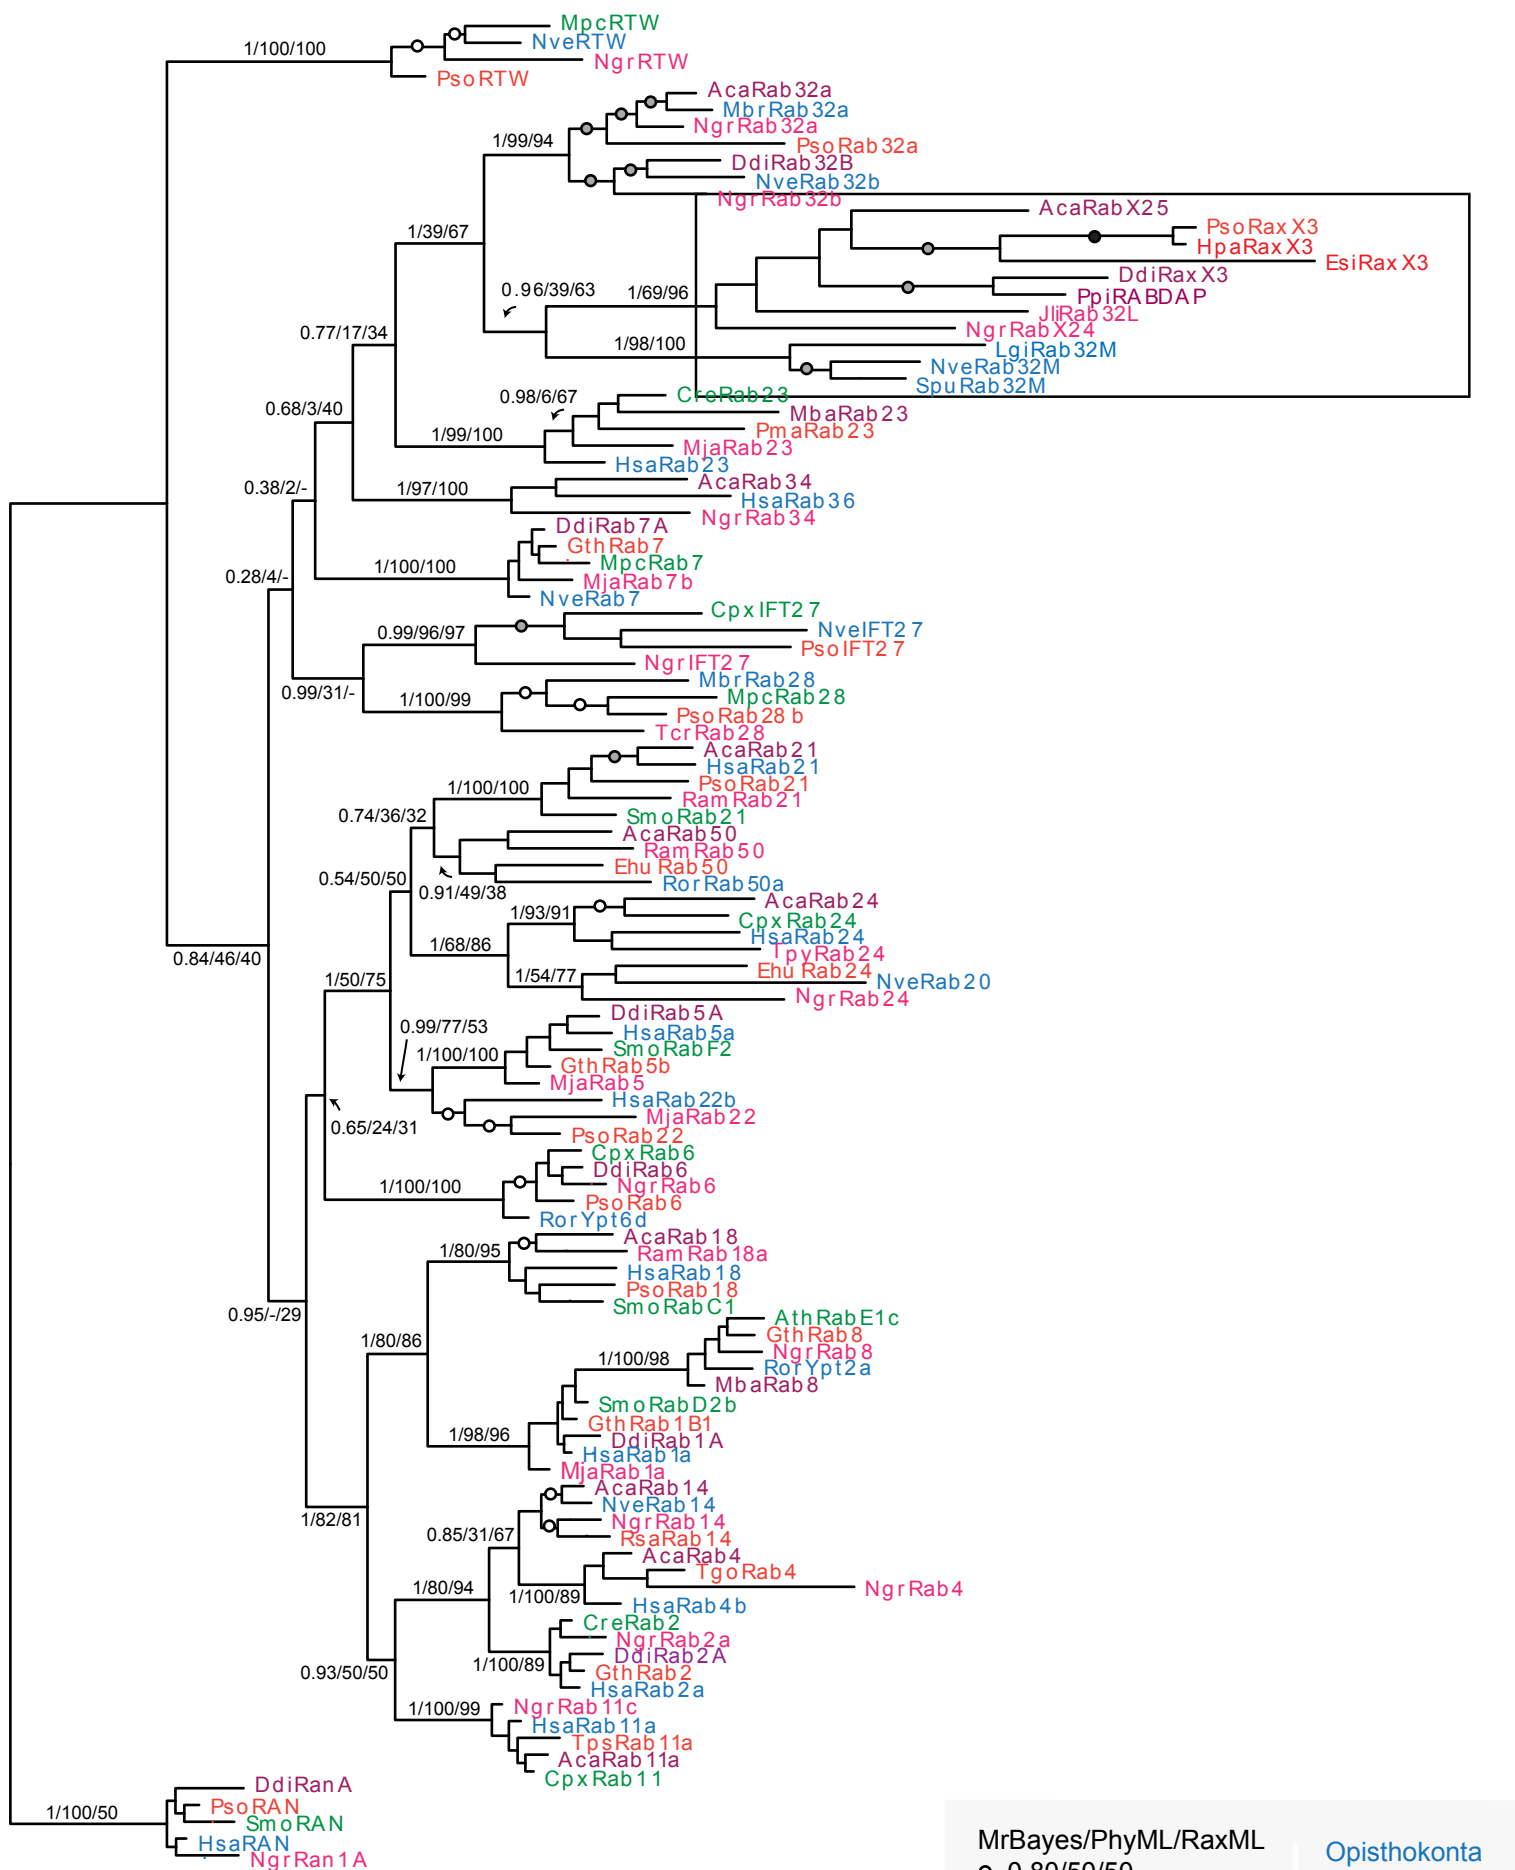

Elias et al. Figure S18

MrBayes/PhyML/RaxML

○ 0.80/50/50

○ 0.95/75/75

● 0.99/99/99

0.3

Opisthokonta

Amoebozoa

Archaeplastida

Chromalveolata

Excavata
