# Supplementary material
Source: PubMed Central journal article supplement (PMC3383260)

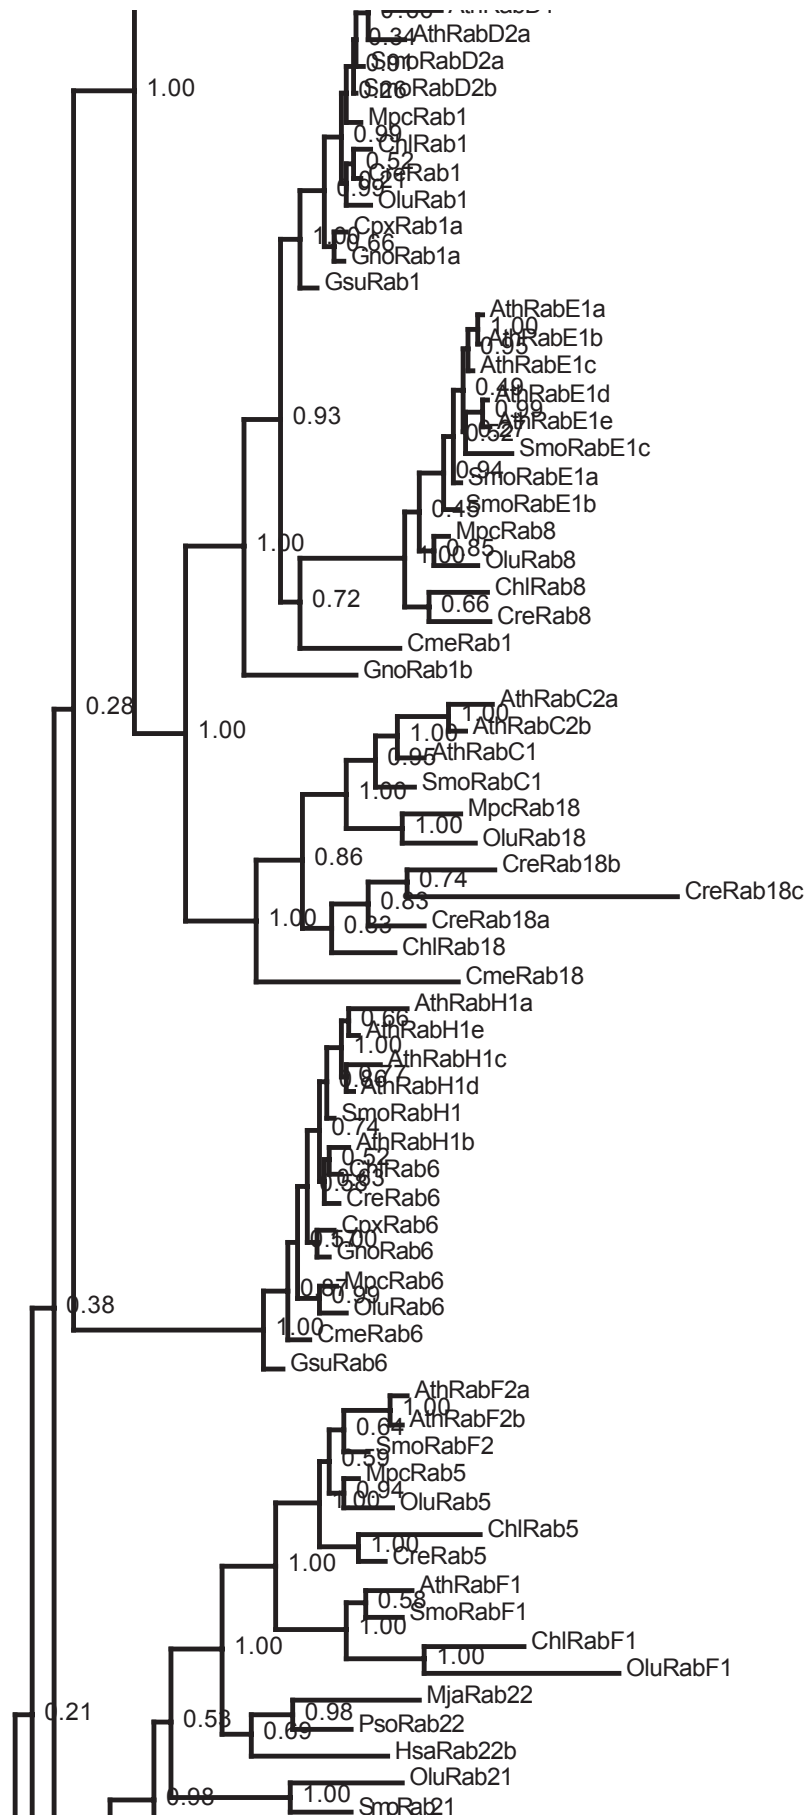

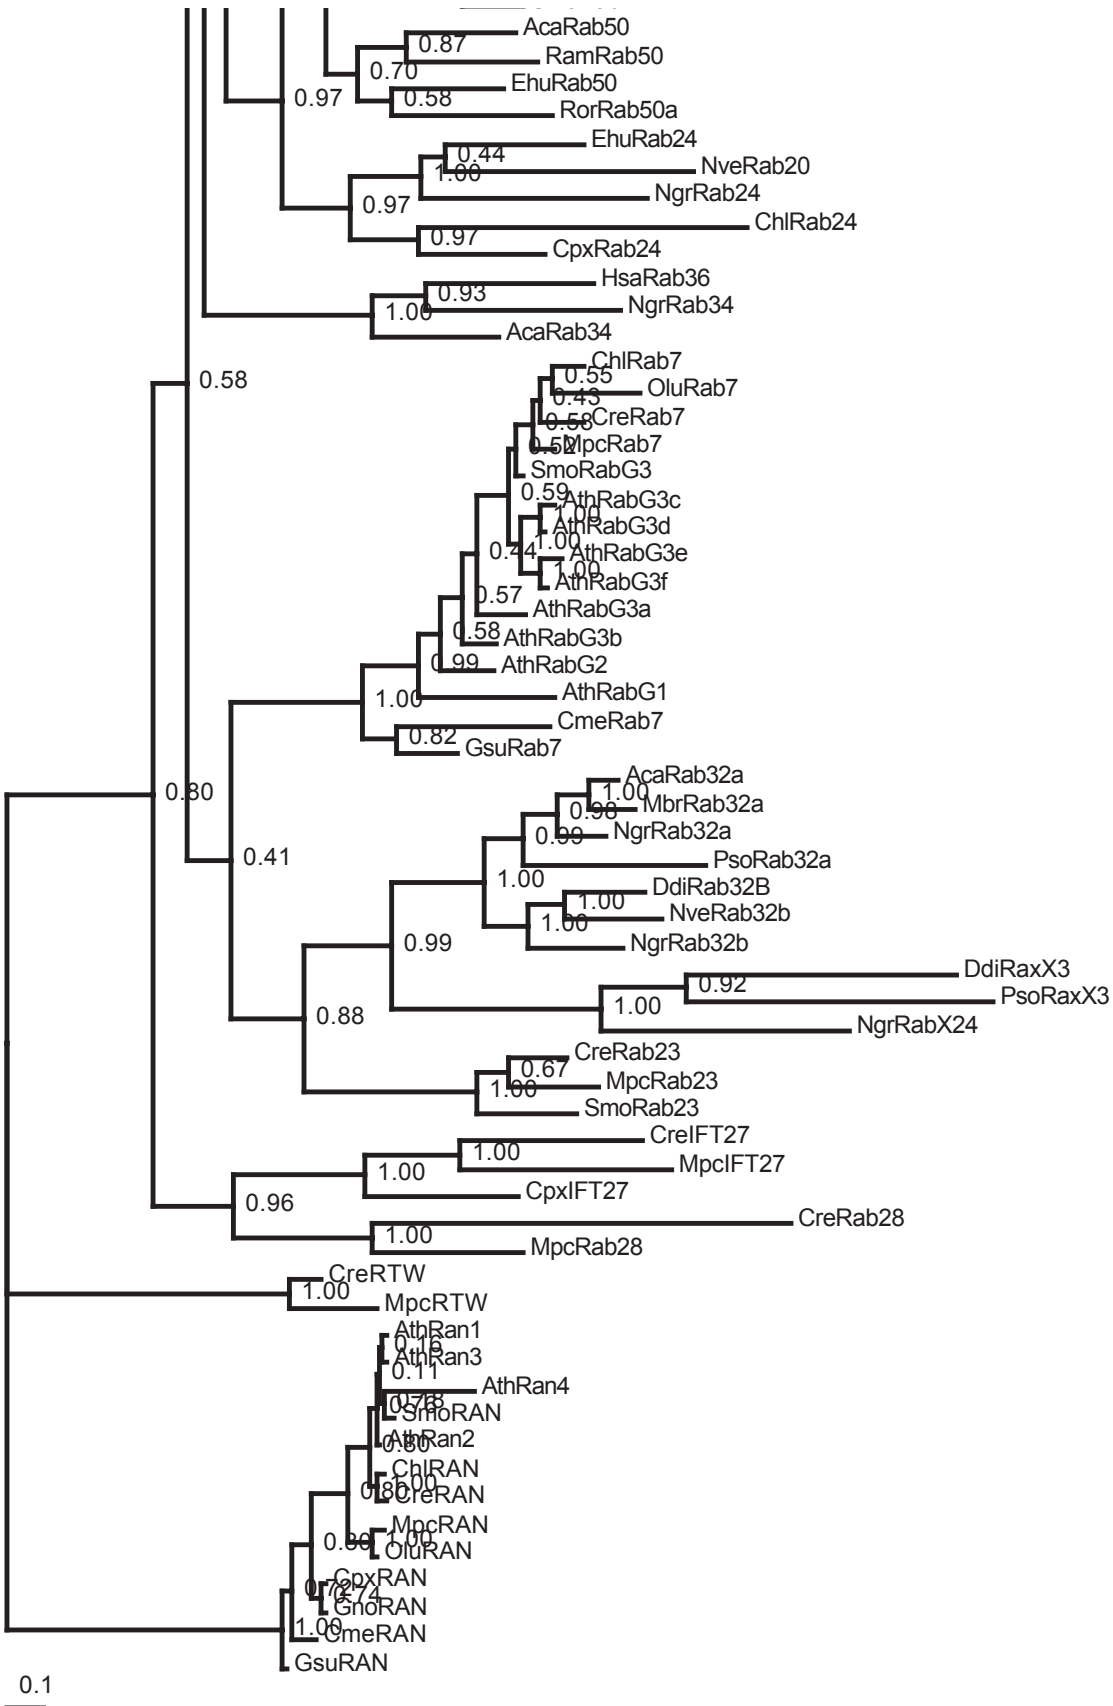

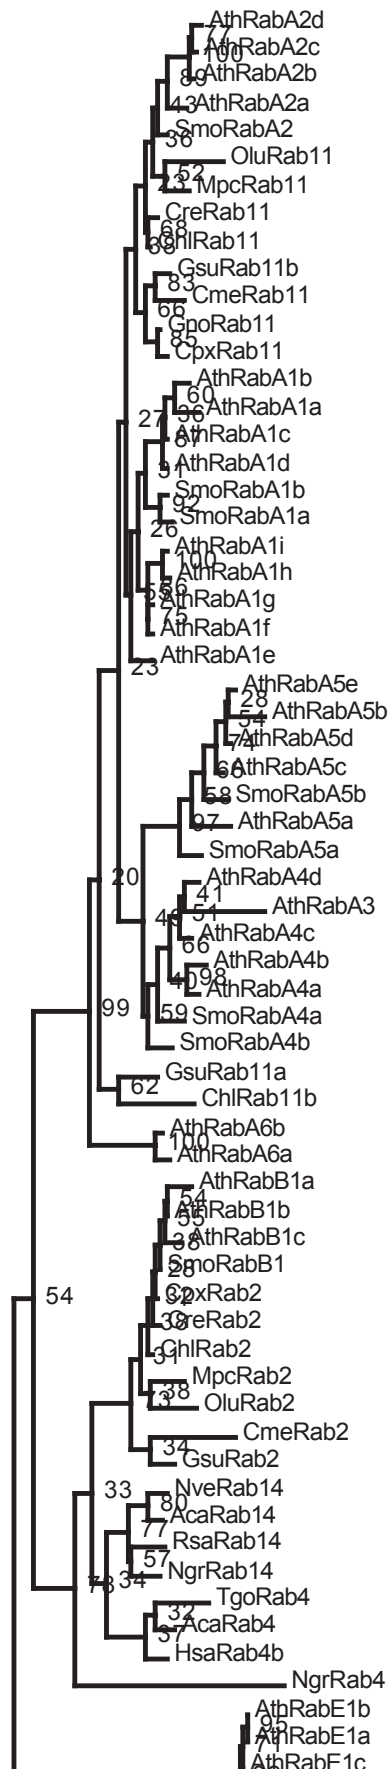

Elias et. al. Figure S10: PhyML\_page1

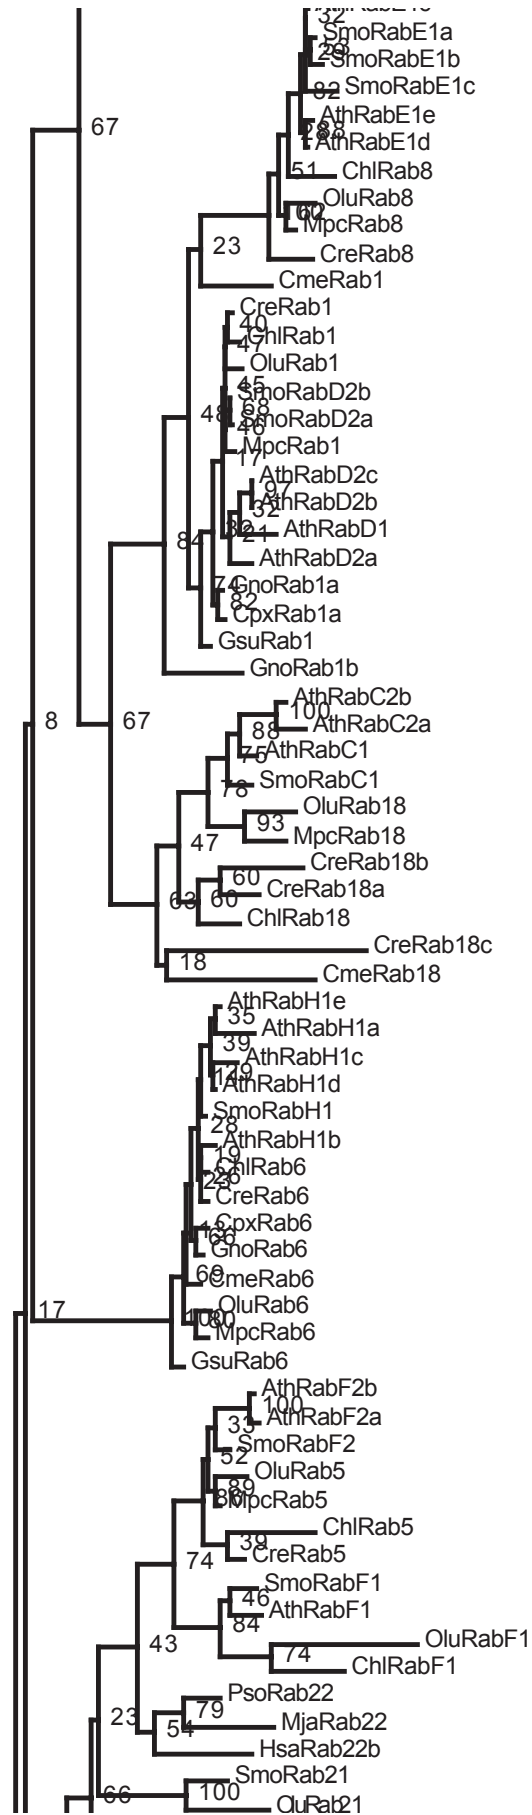

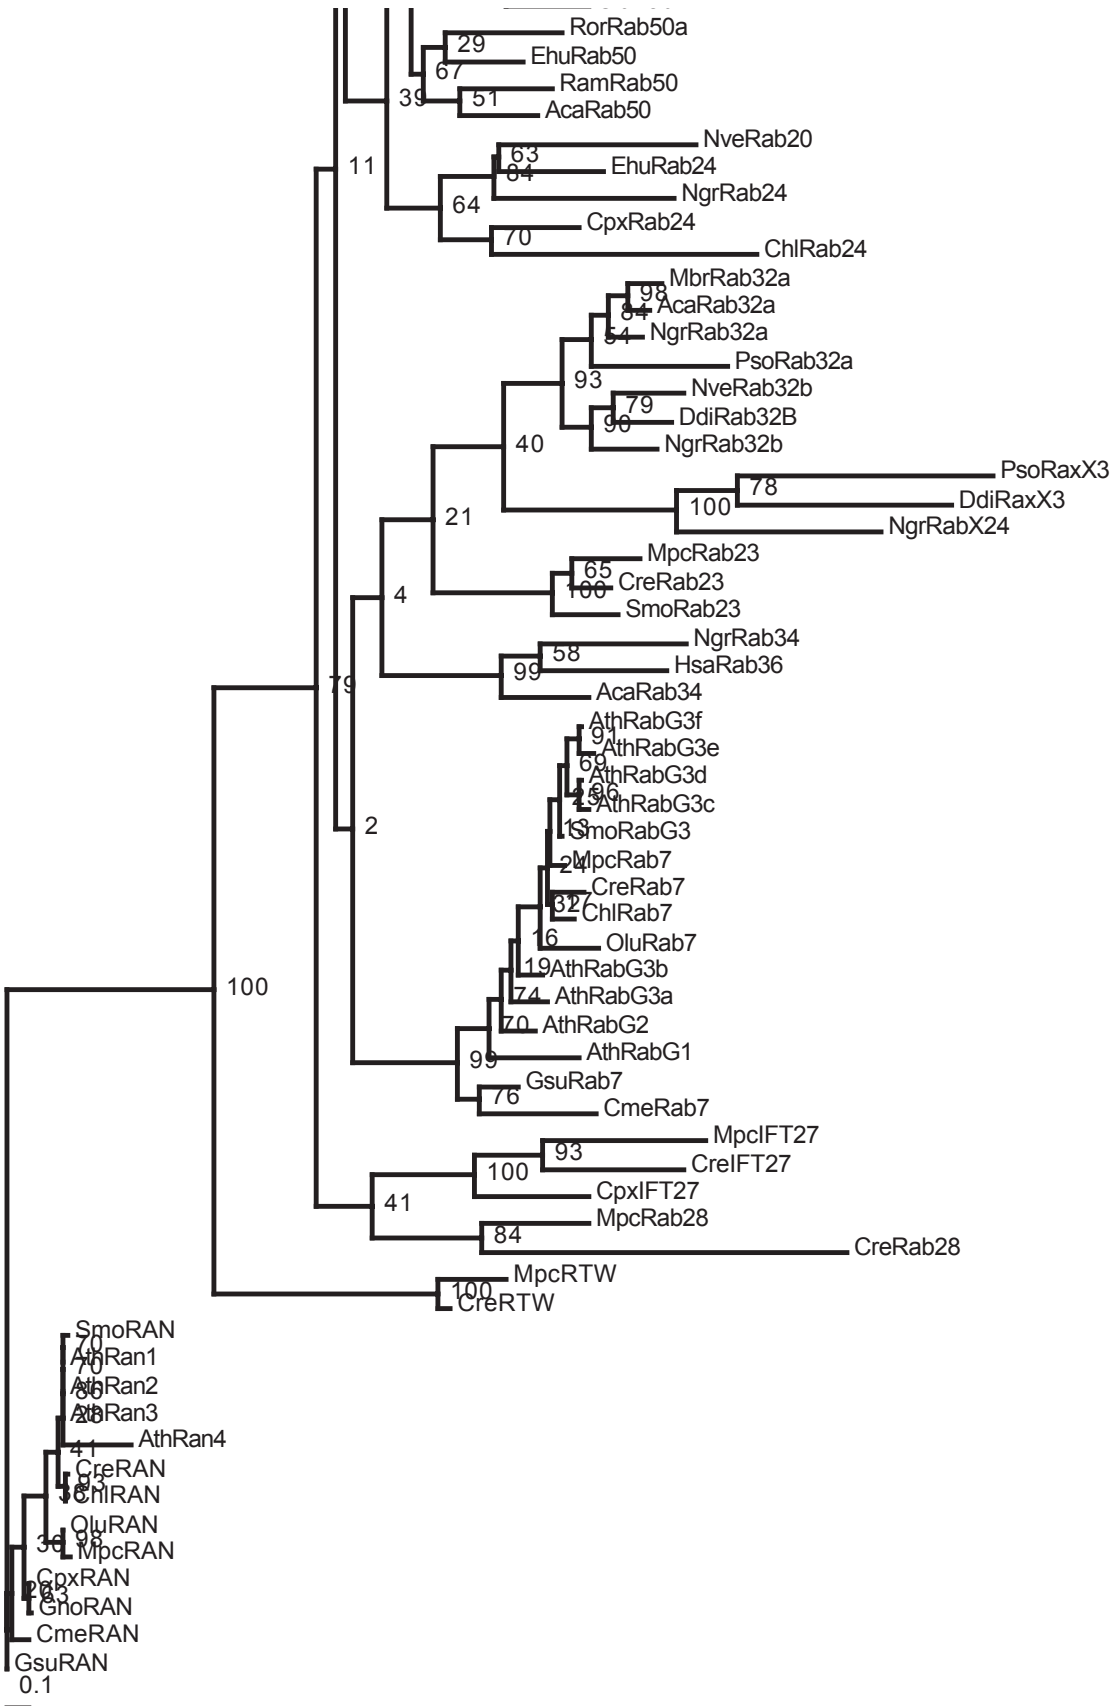

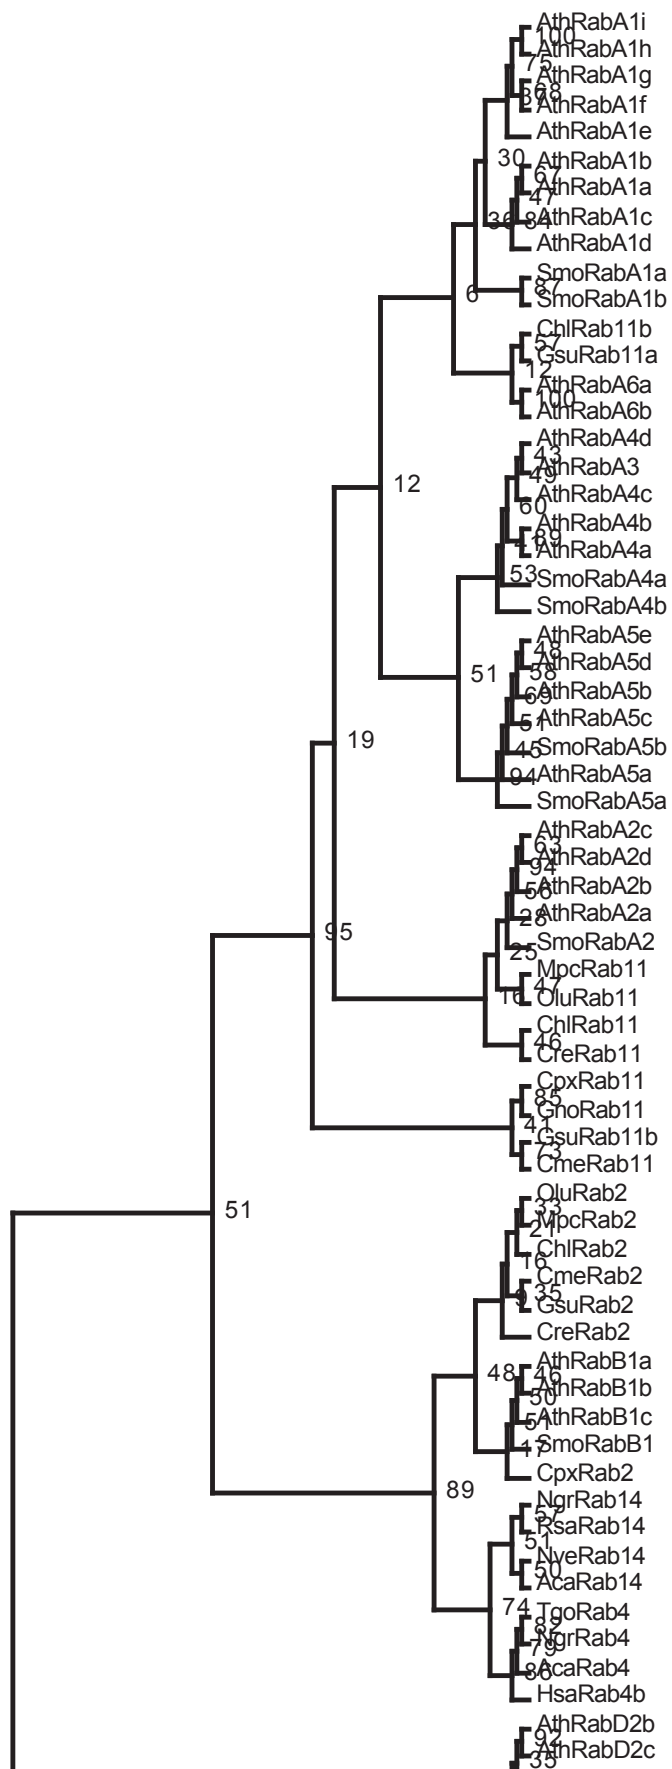





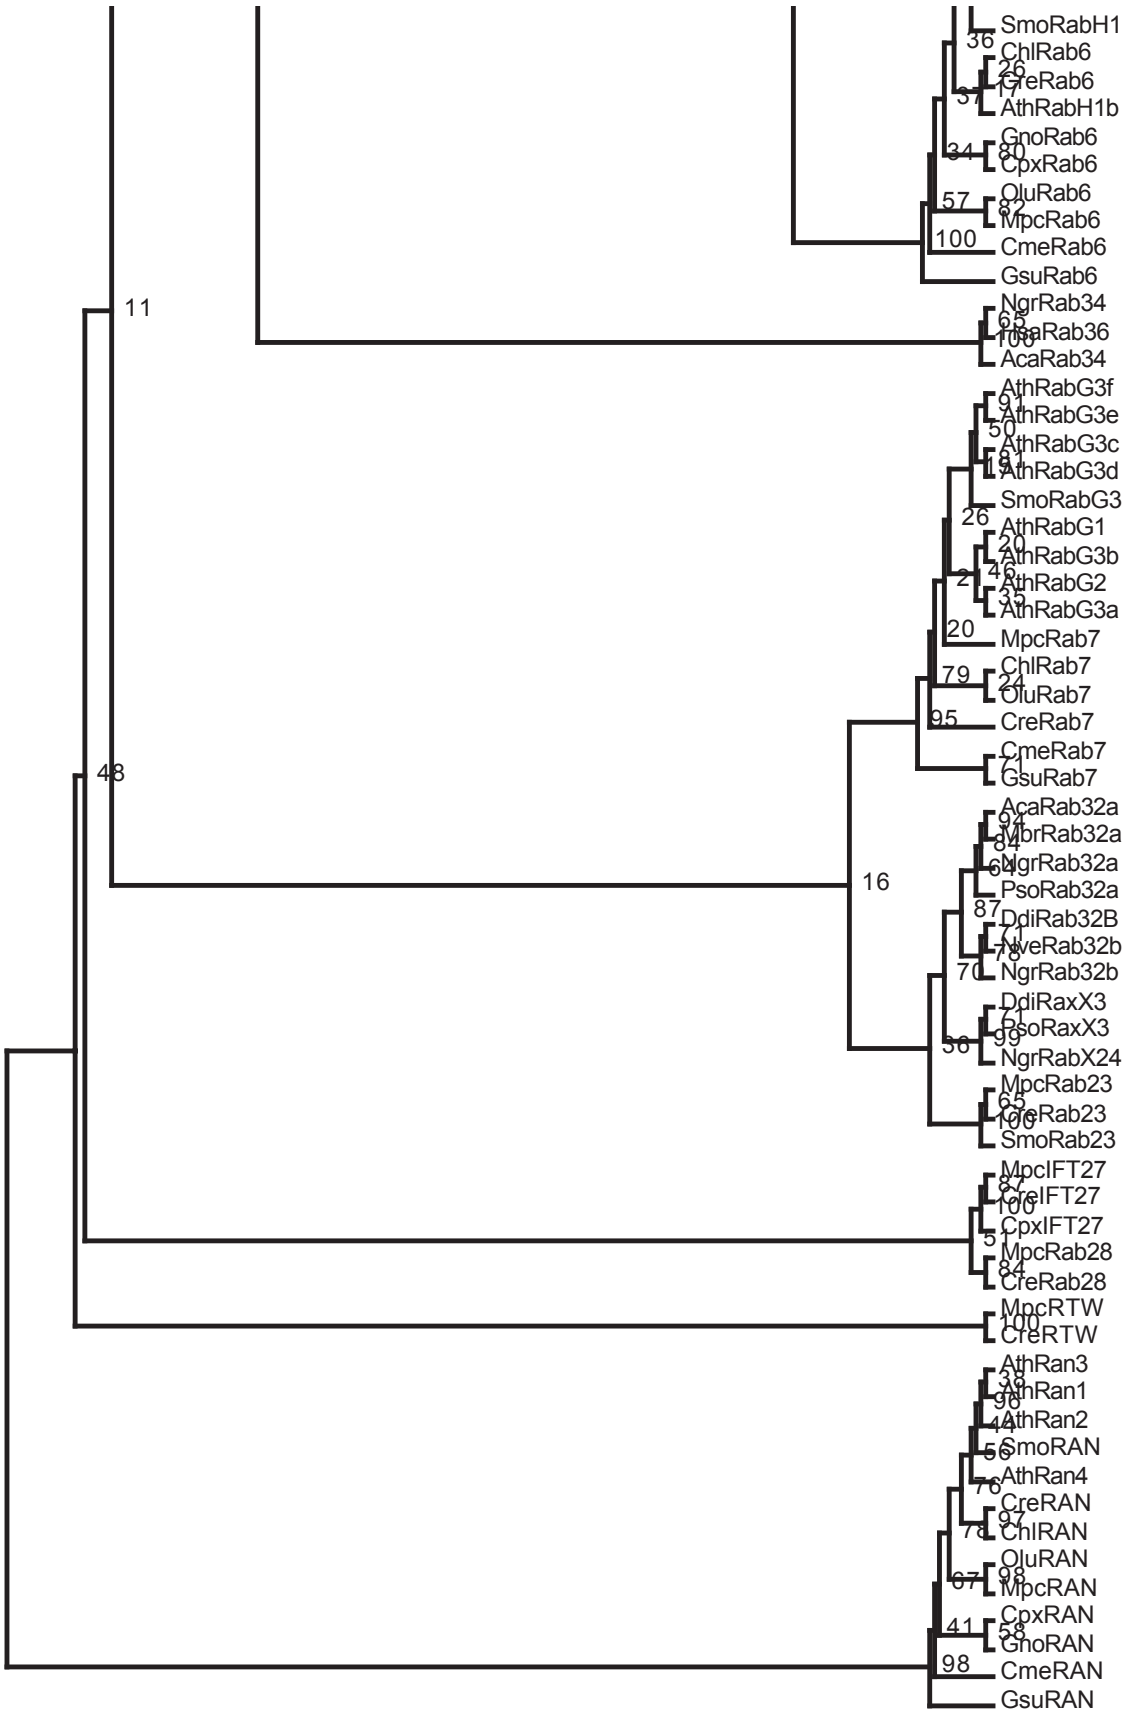

Supplement: supp_125.10.2500_JCS101378FigS10.pdf [file supp_125.10.2500_JCS101378FigS10.pdf]

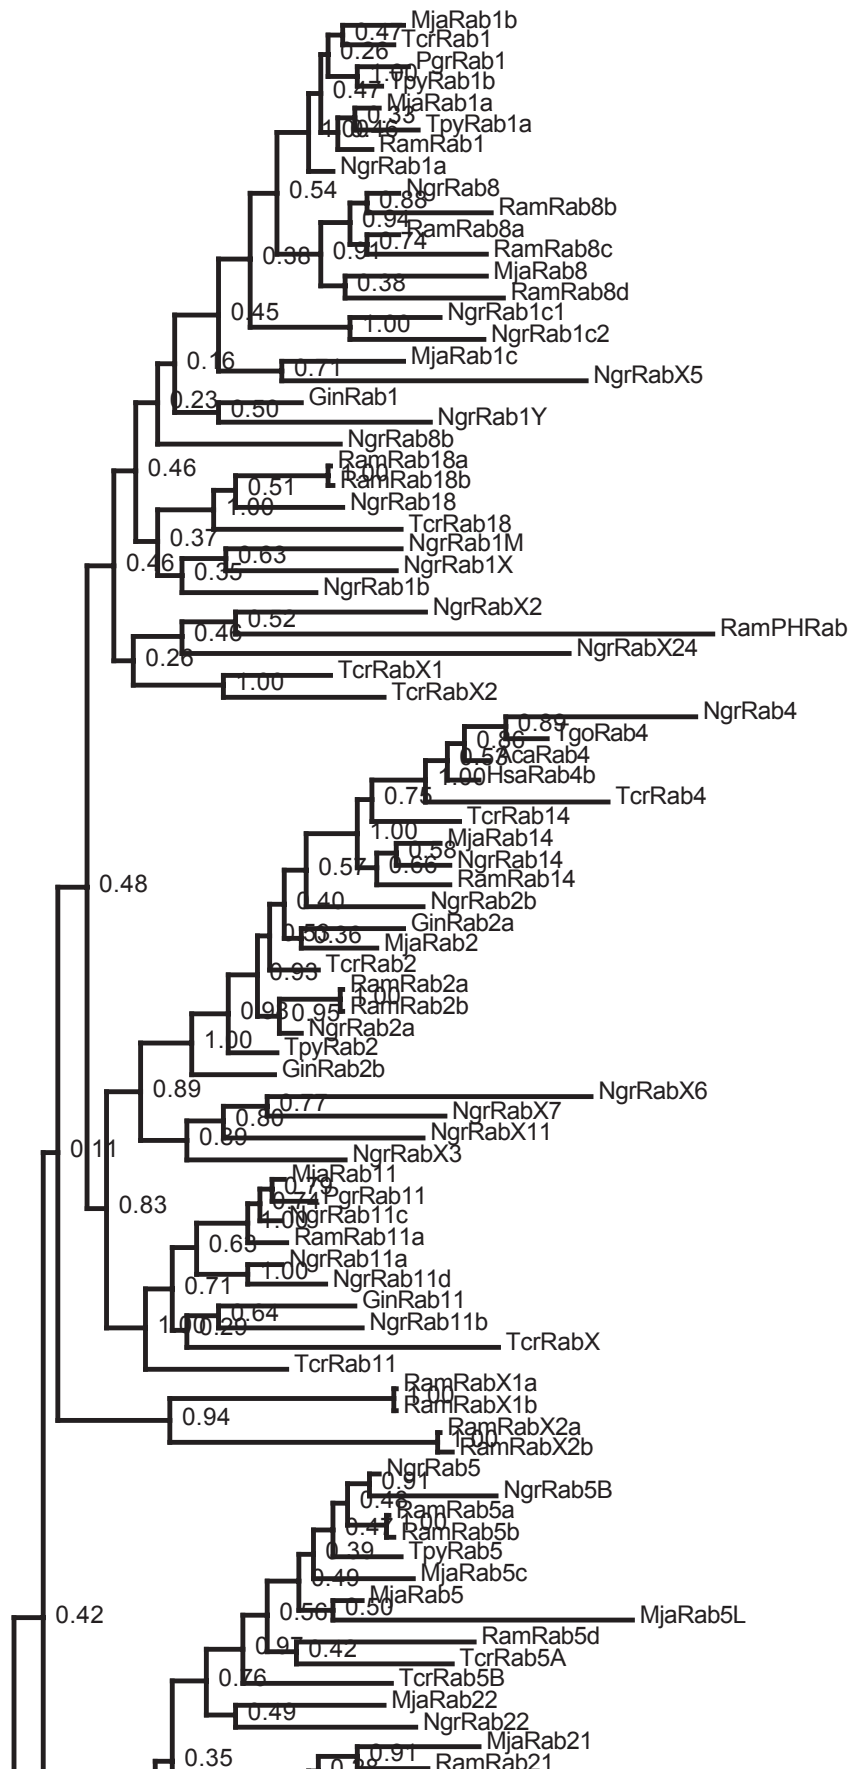

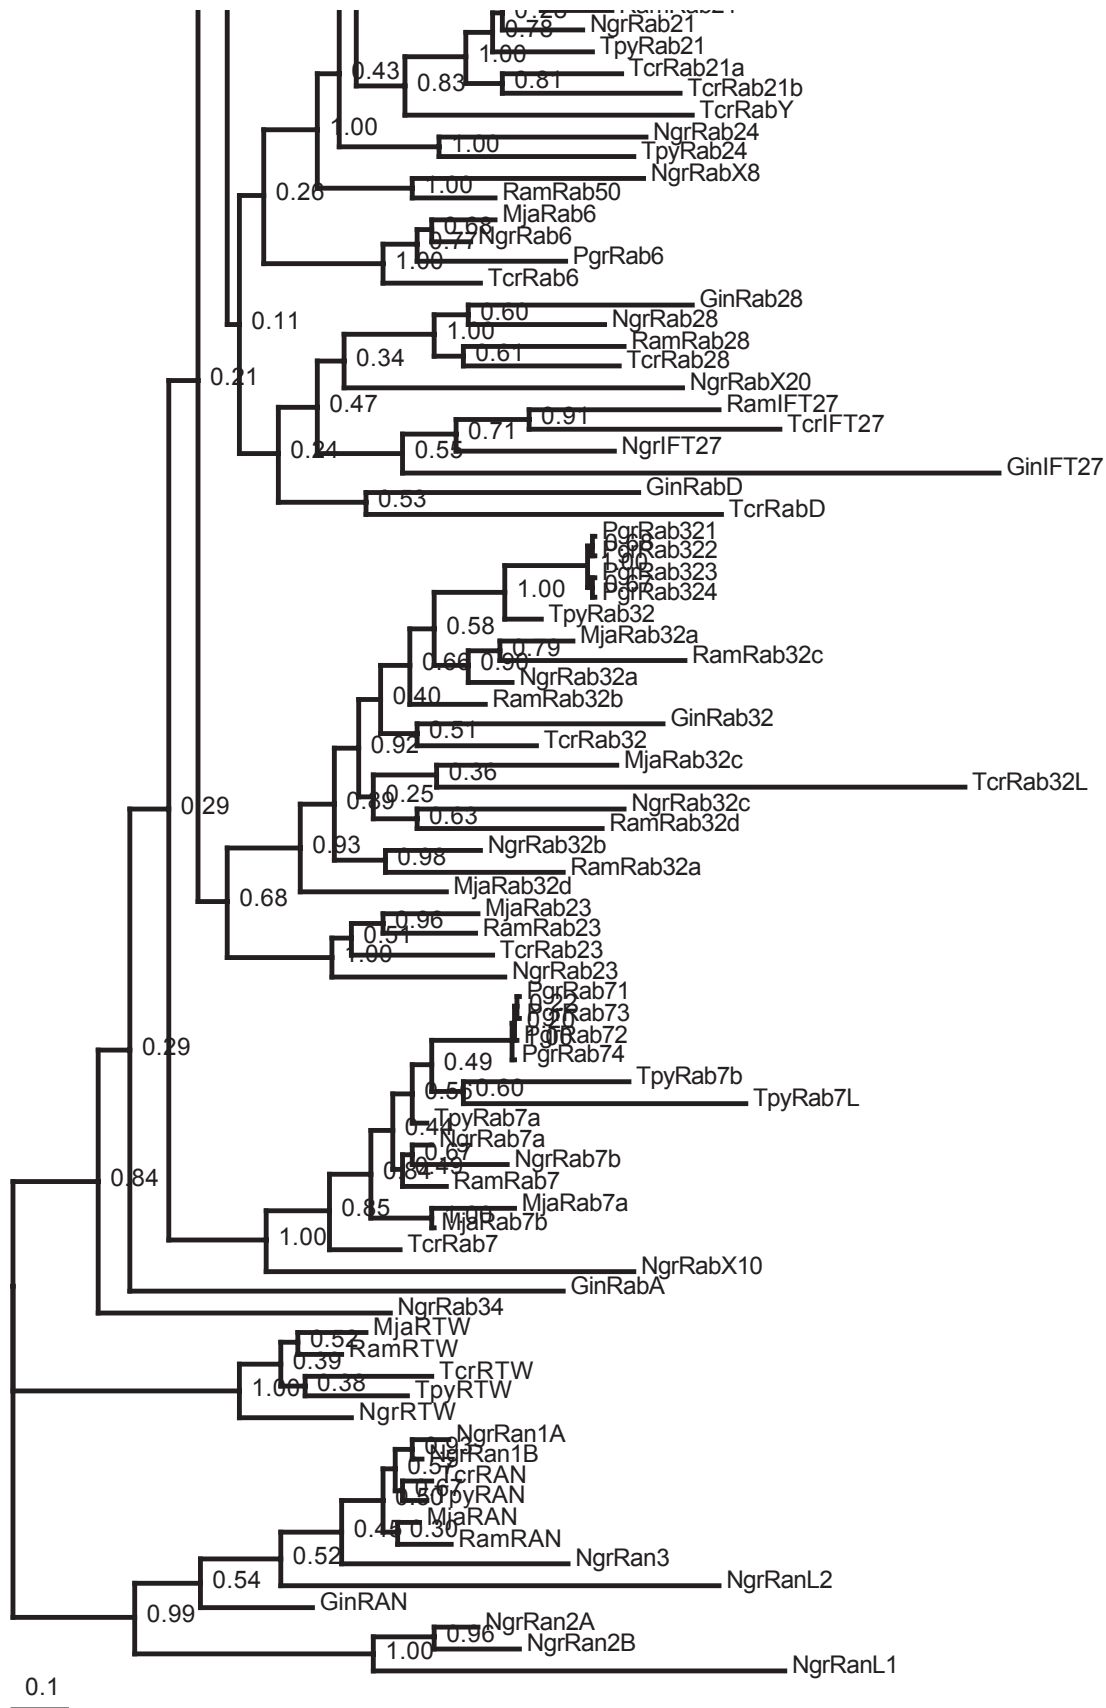

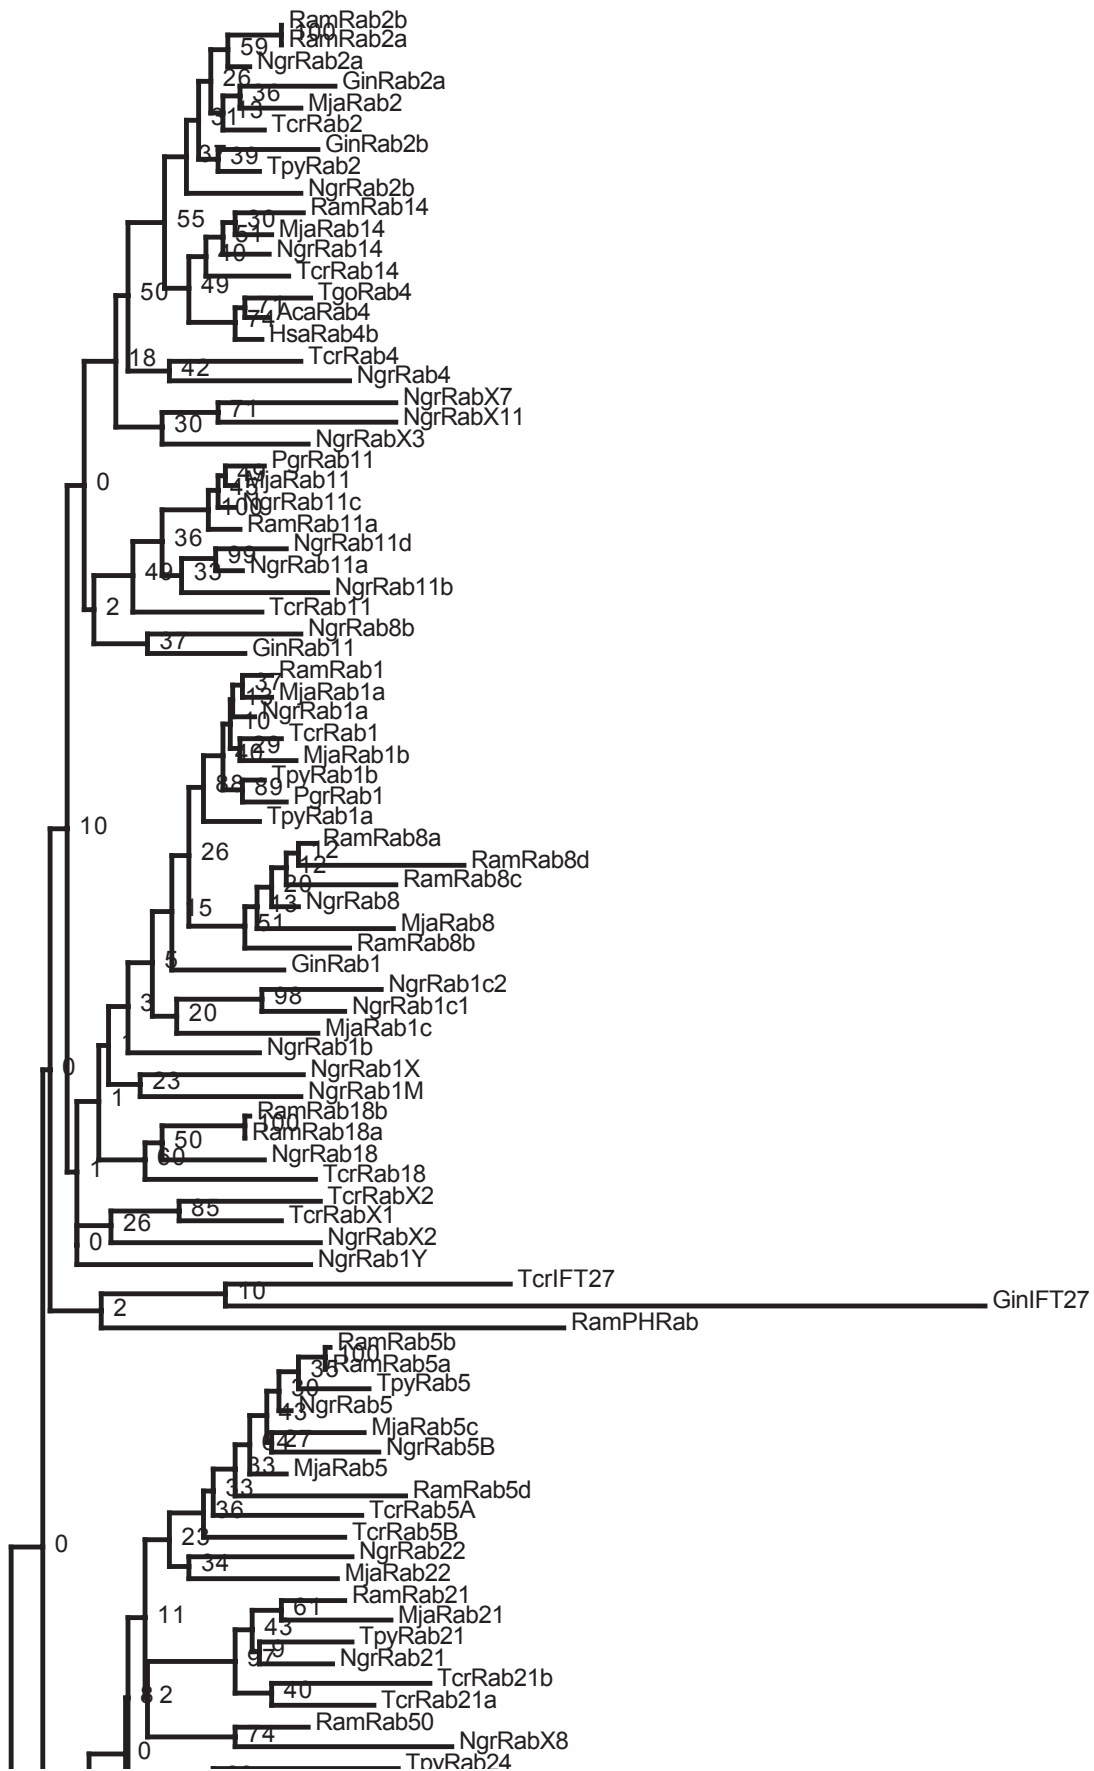

Elias et. al. Figure S11: PhyML\_page1

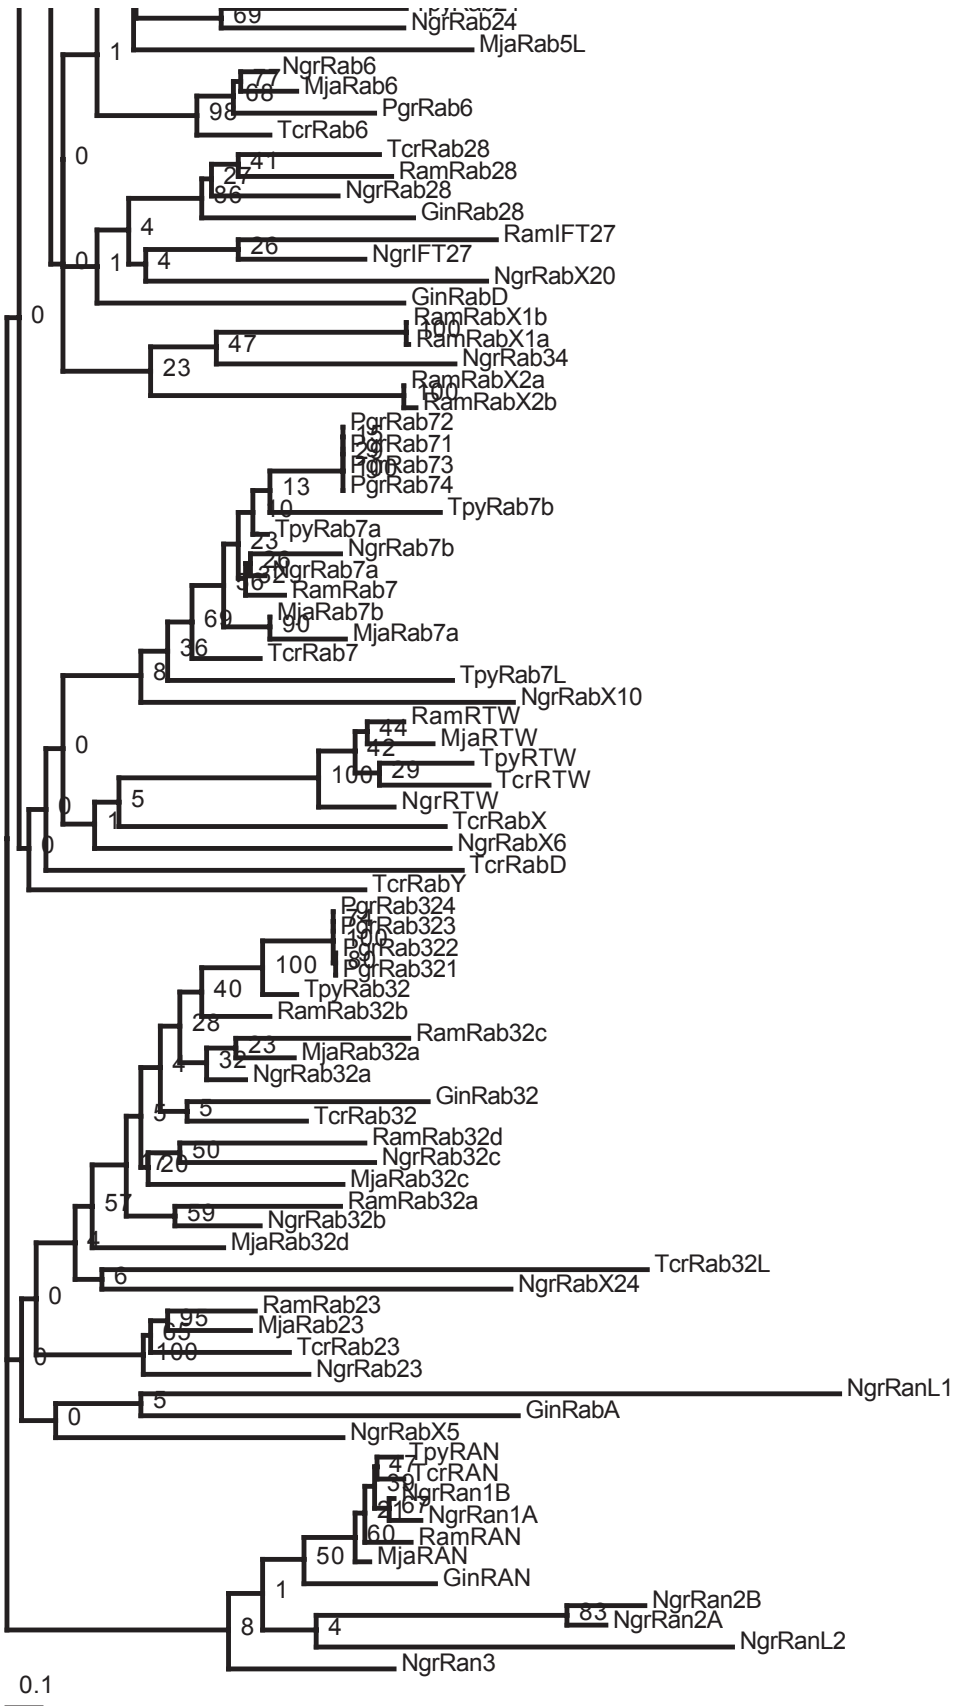

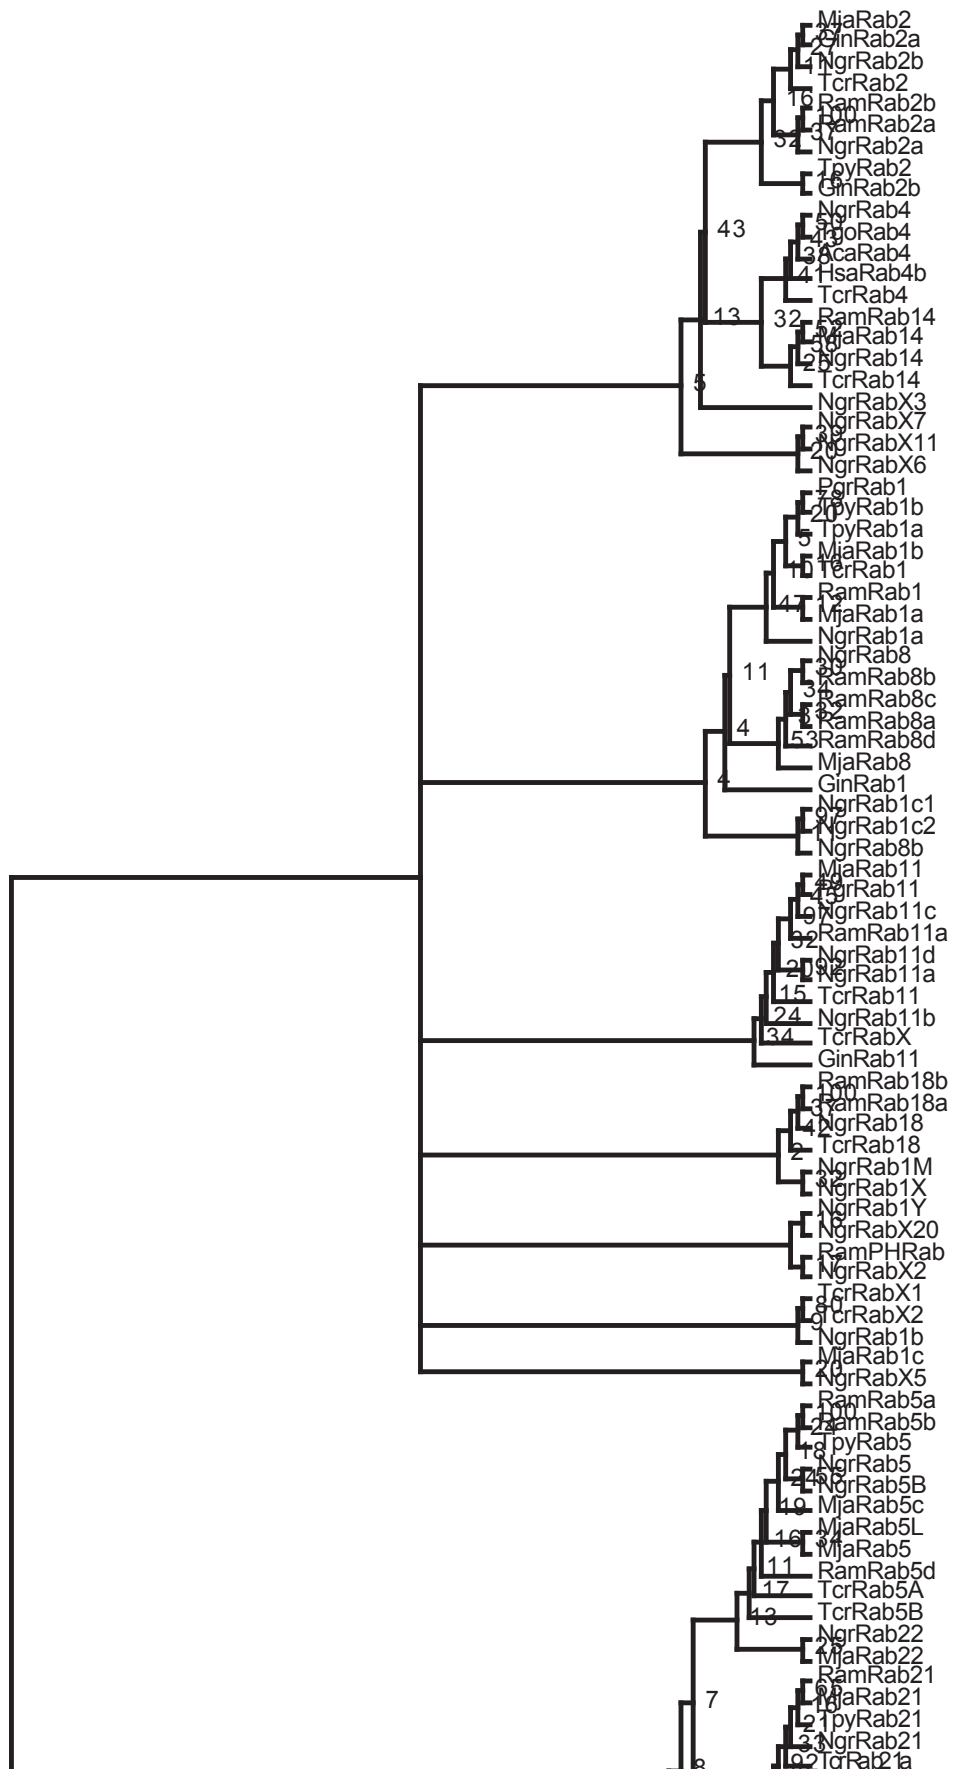

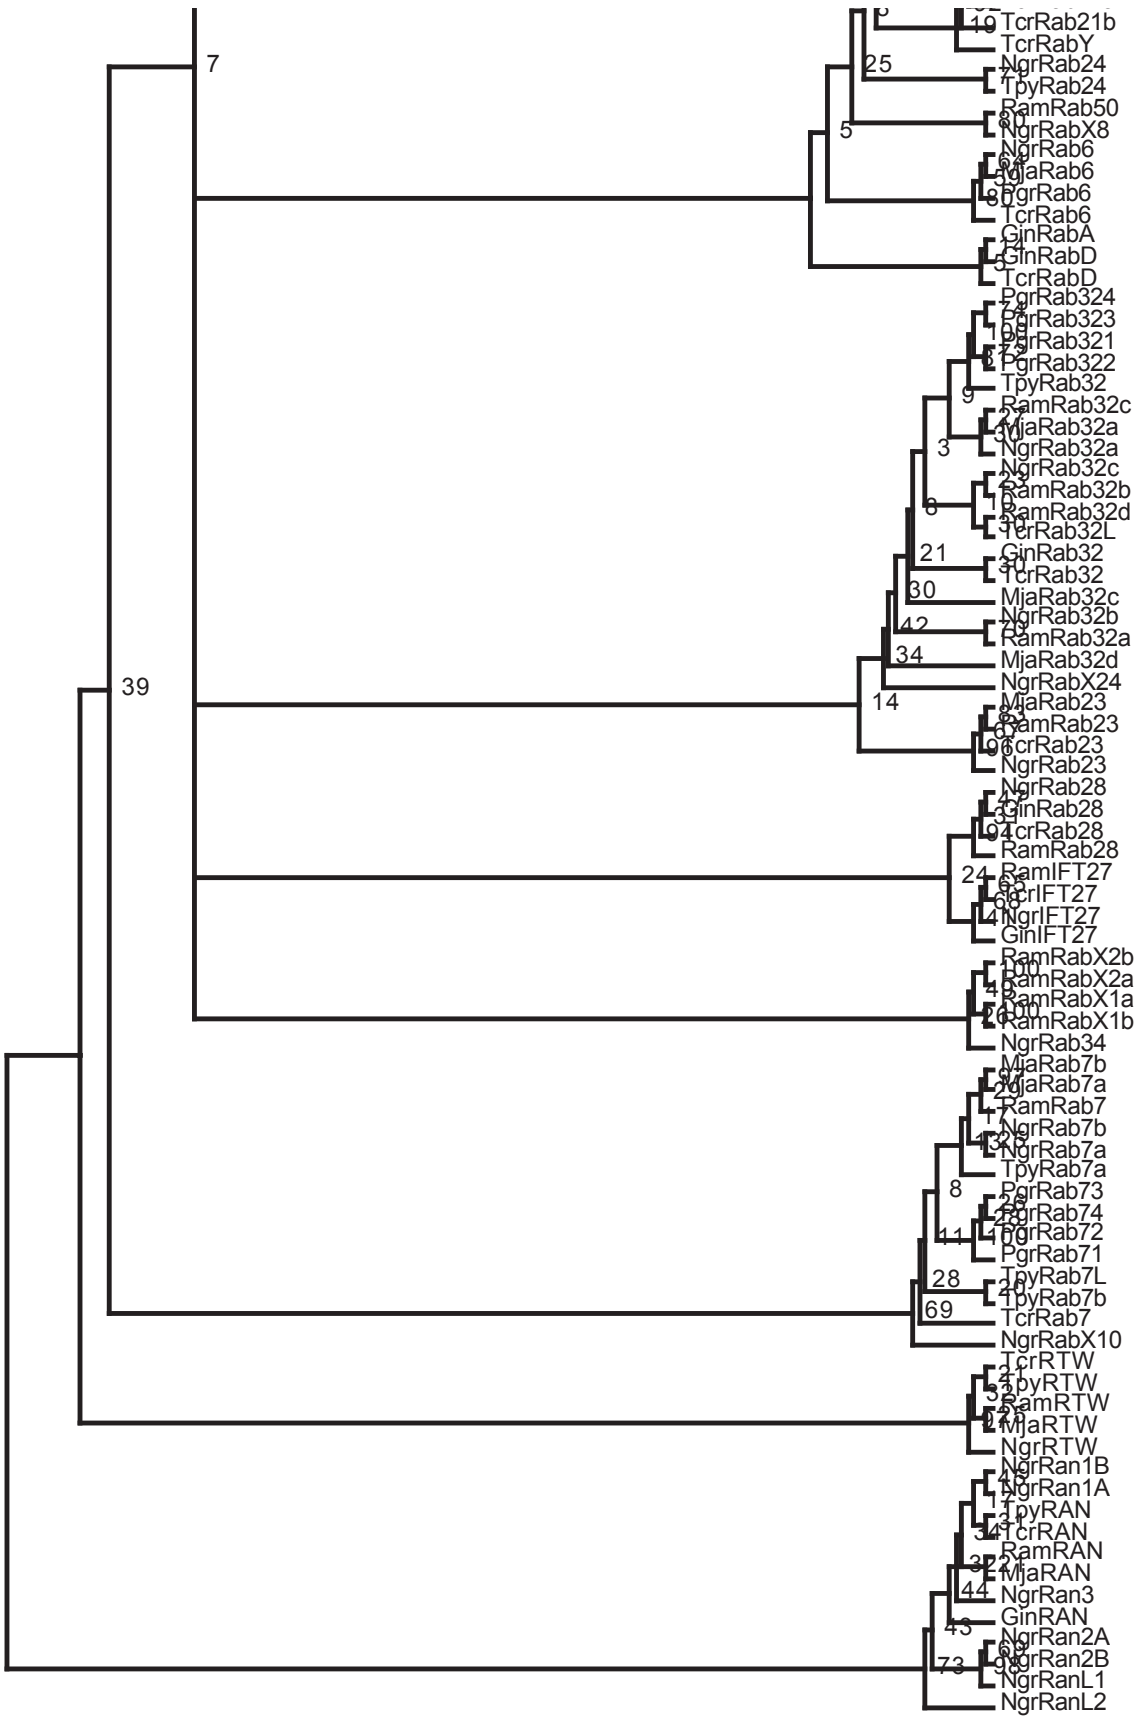

Supplement: supp_125.10.2500_JCS101378FigS11.pdf [file supp_125.10.2500_JCS101378FigS11.pdf]

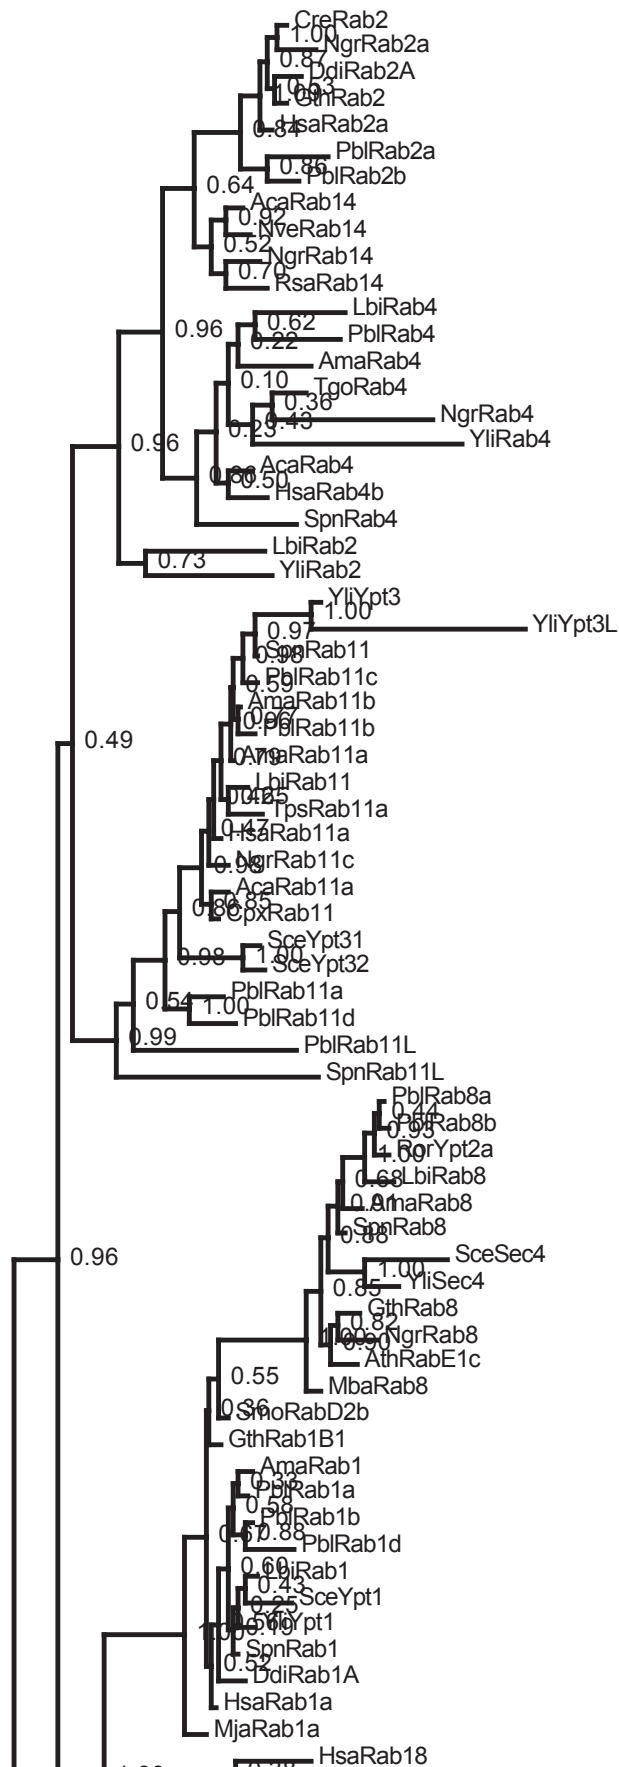

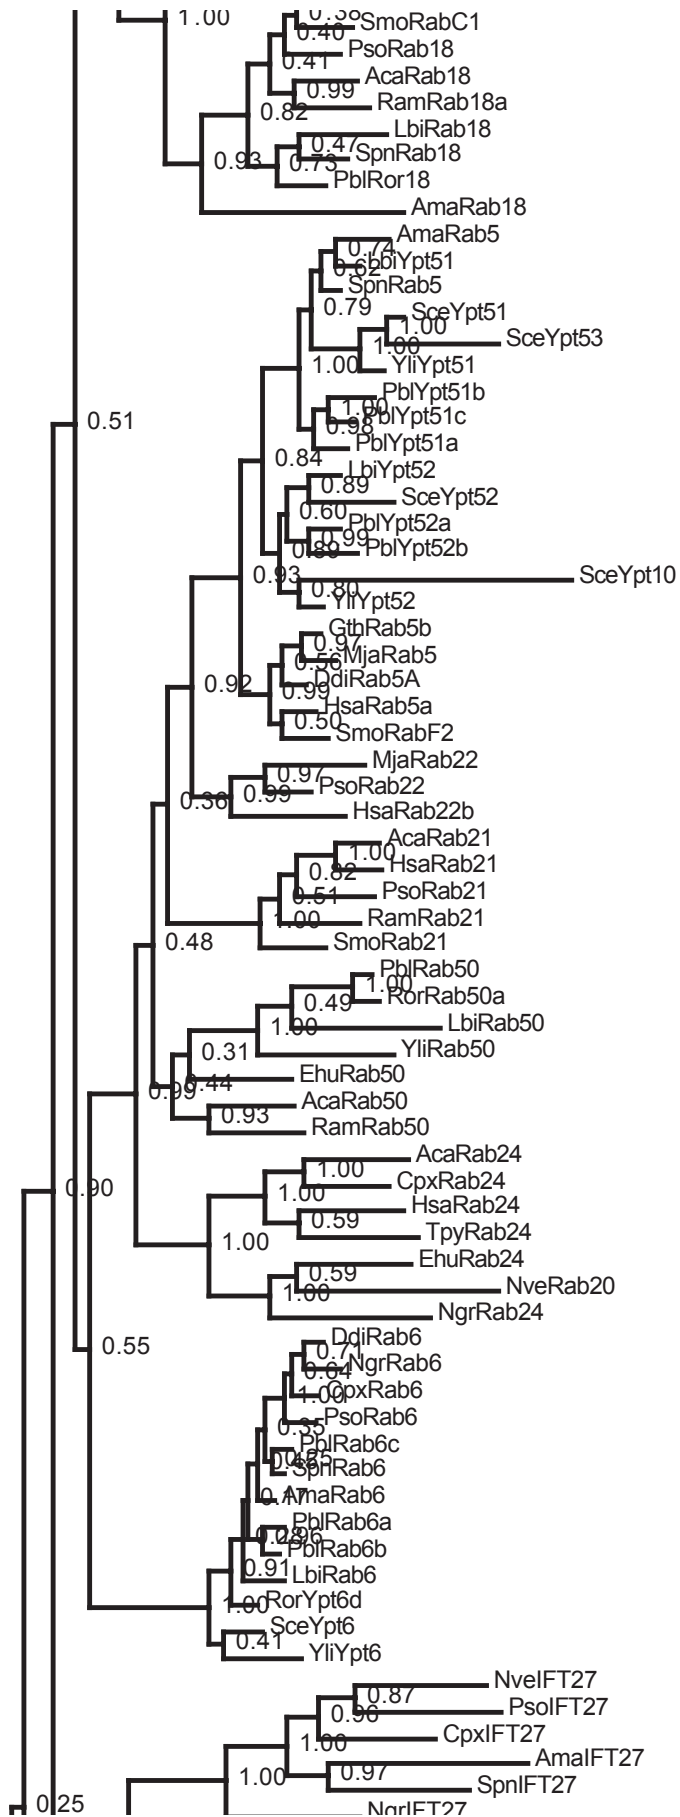

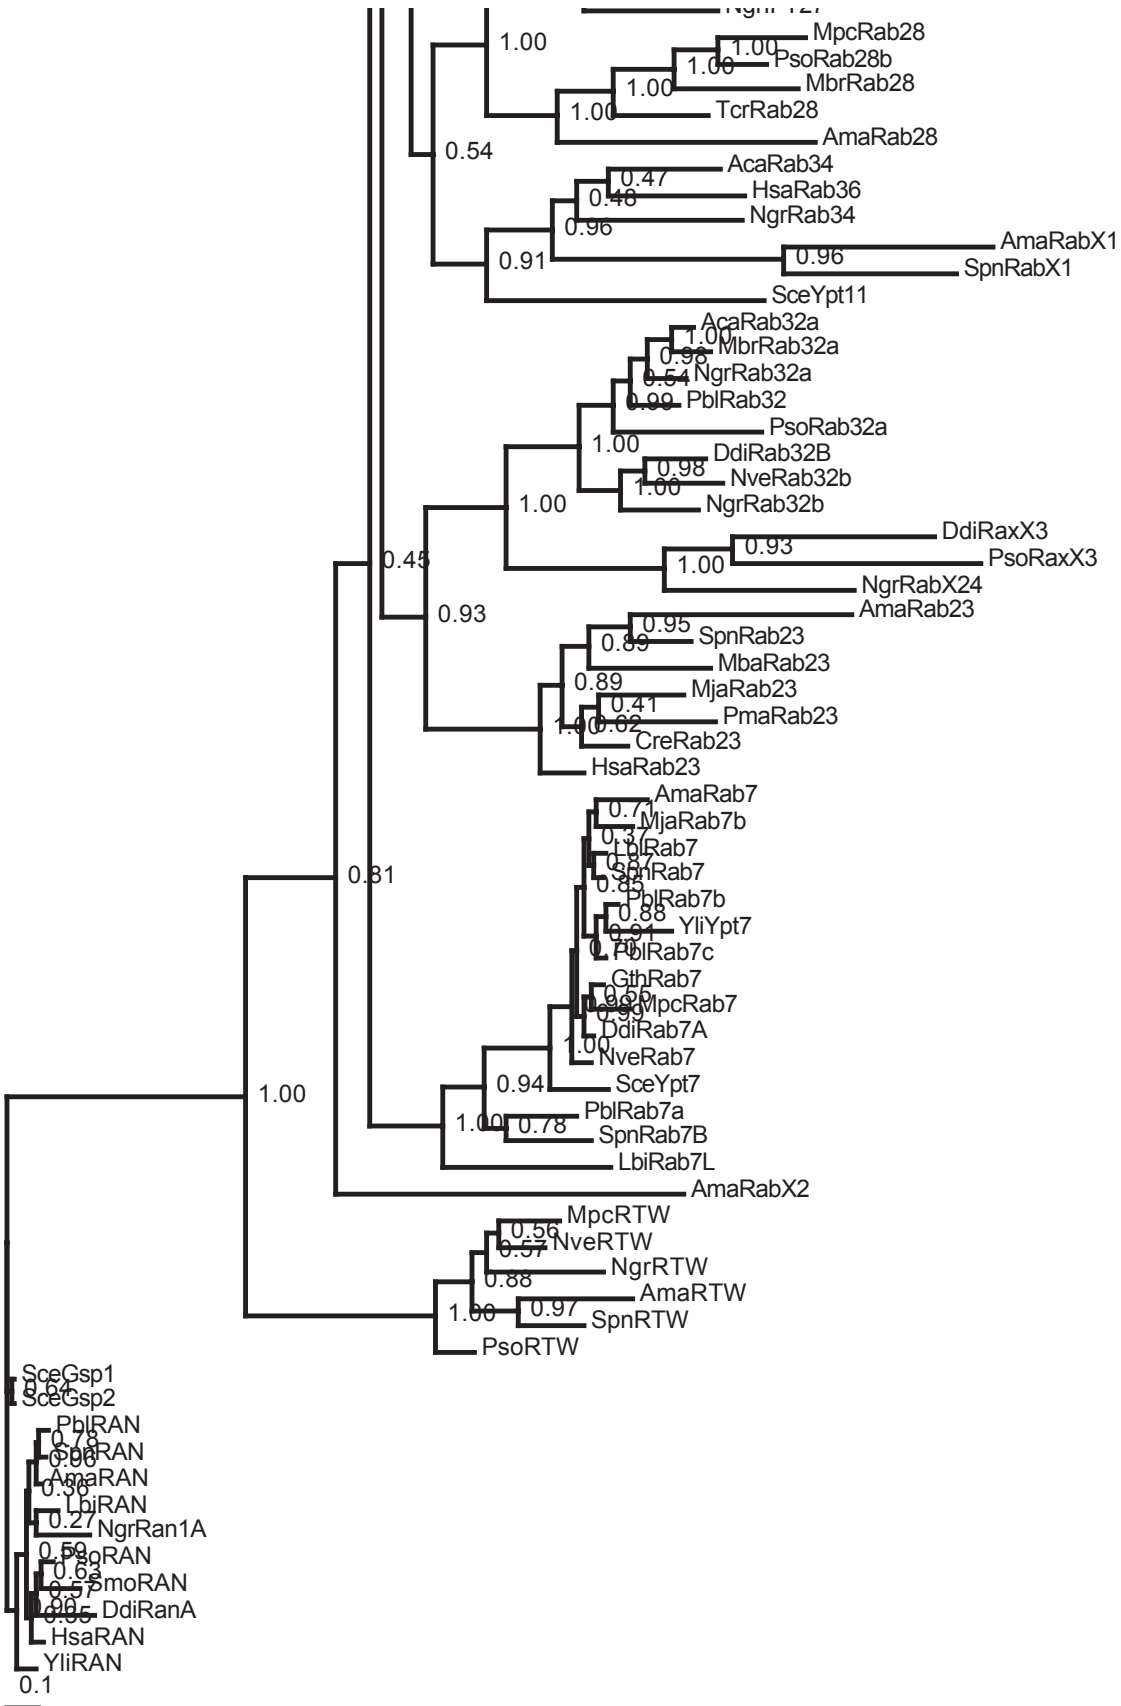

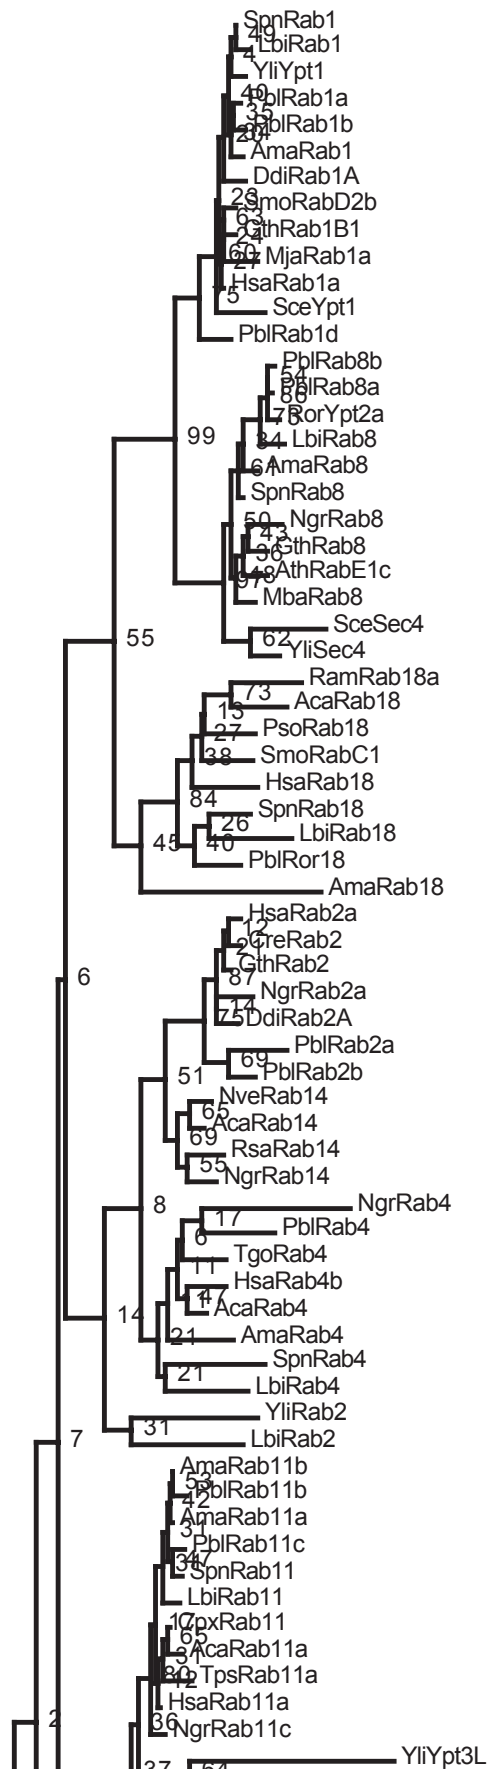

Elias et. al. Figure S12: PhyML\_page1

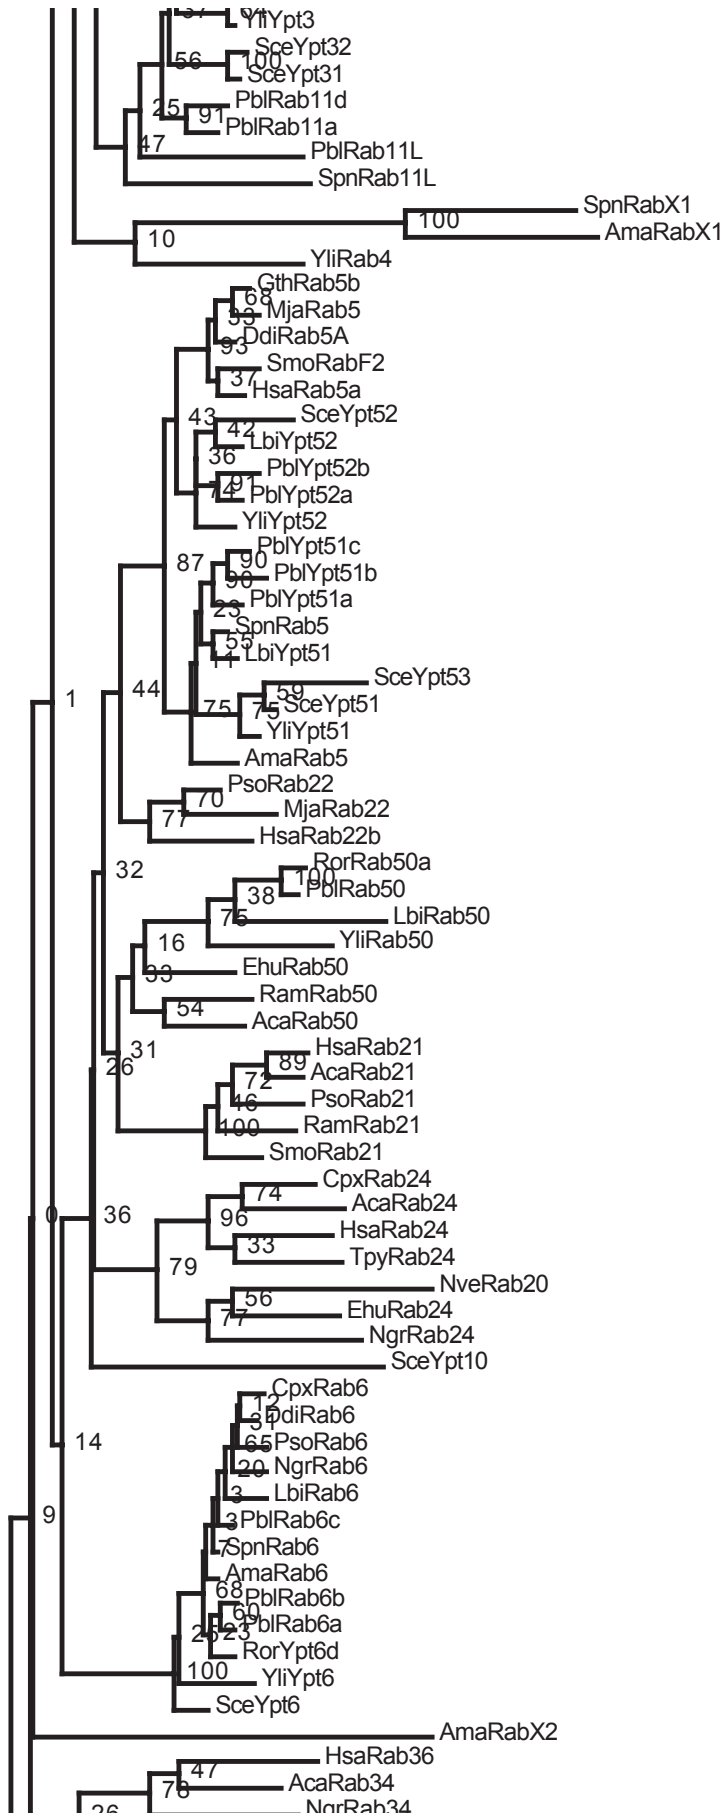

Elias et. al. Figure S12: PhyML\_page2

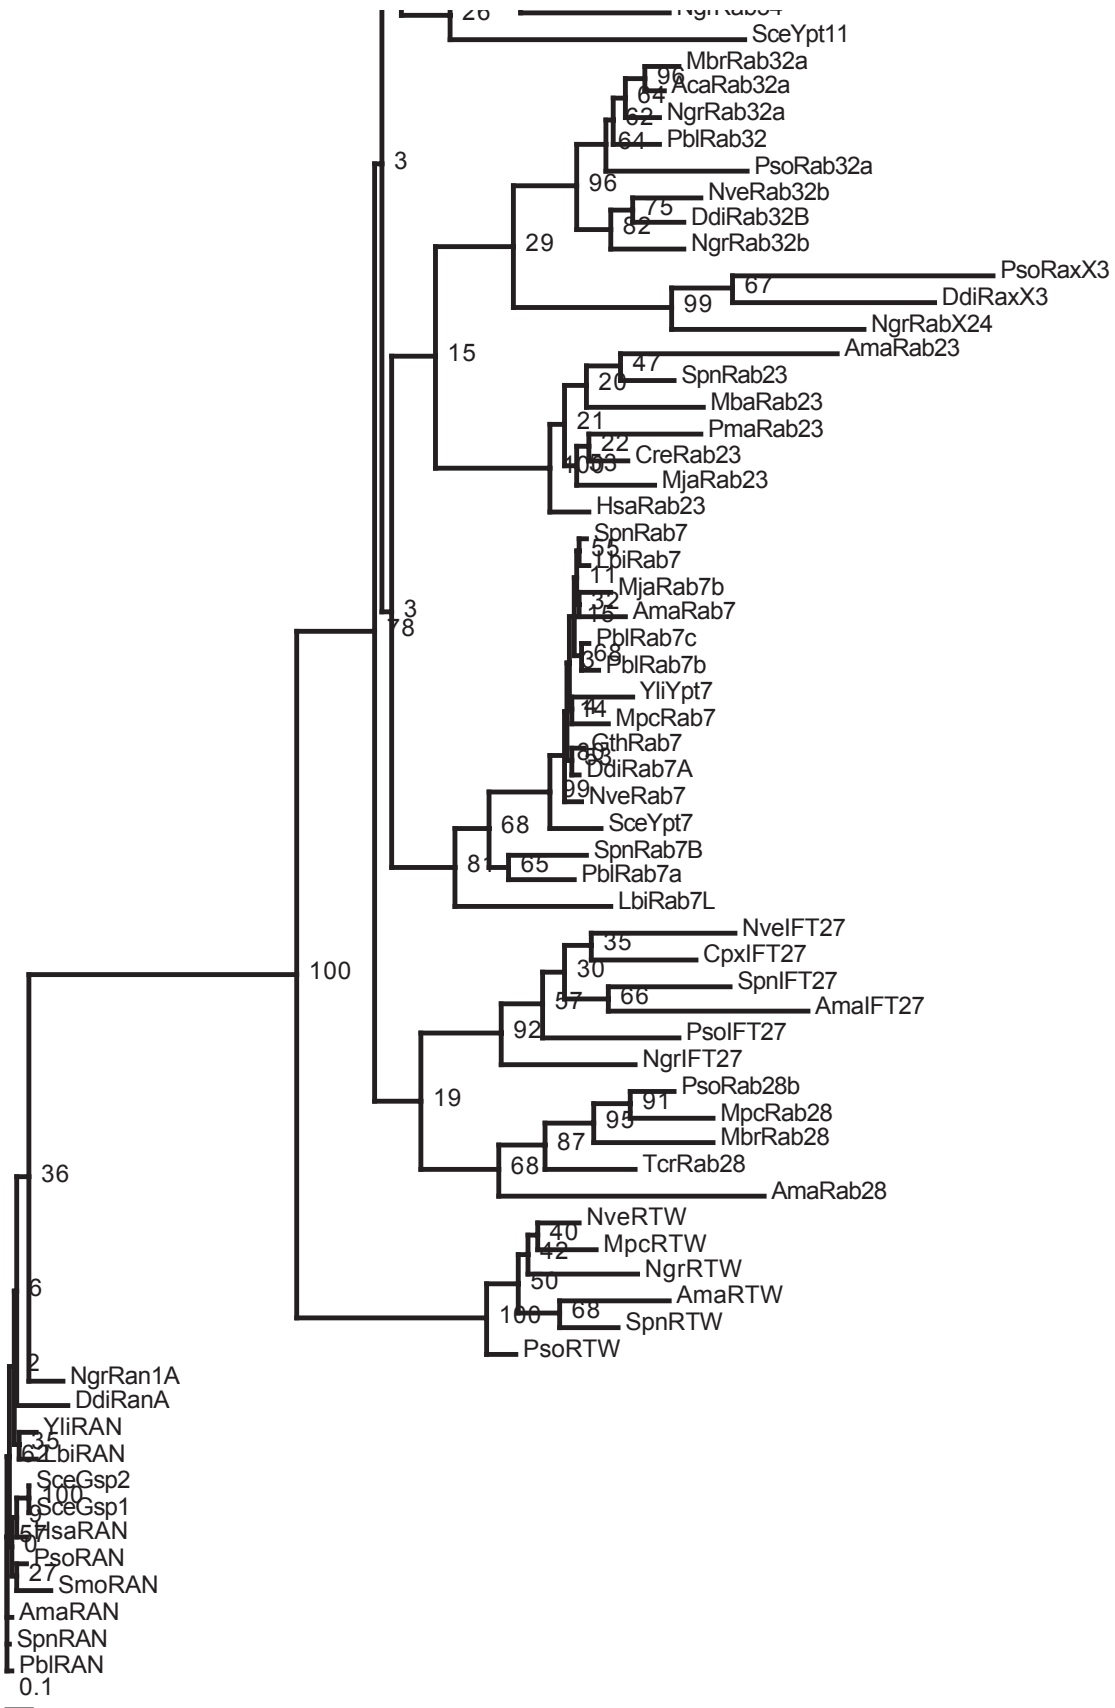

Elias et. al. Figure S12: PhyML\_page3

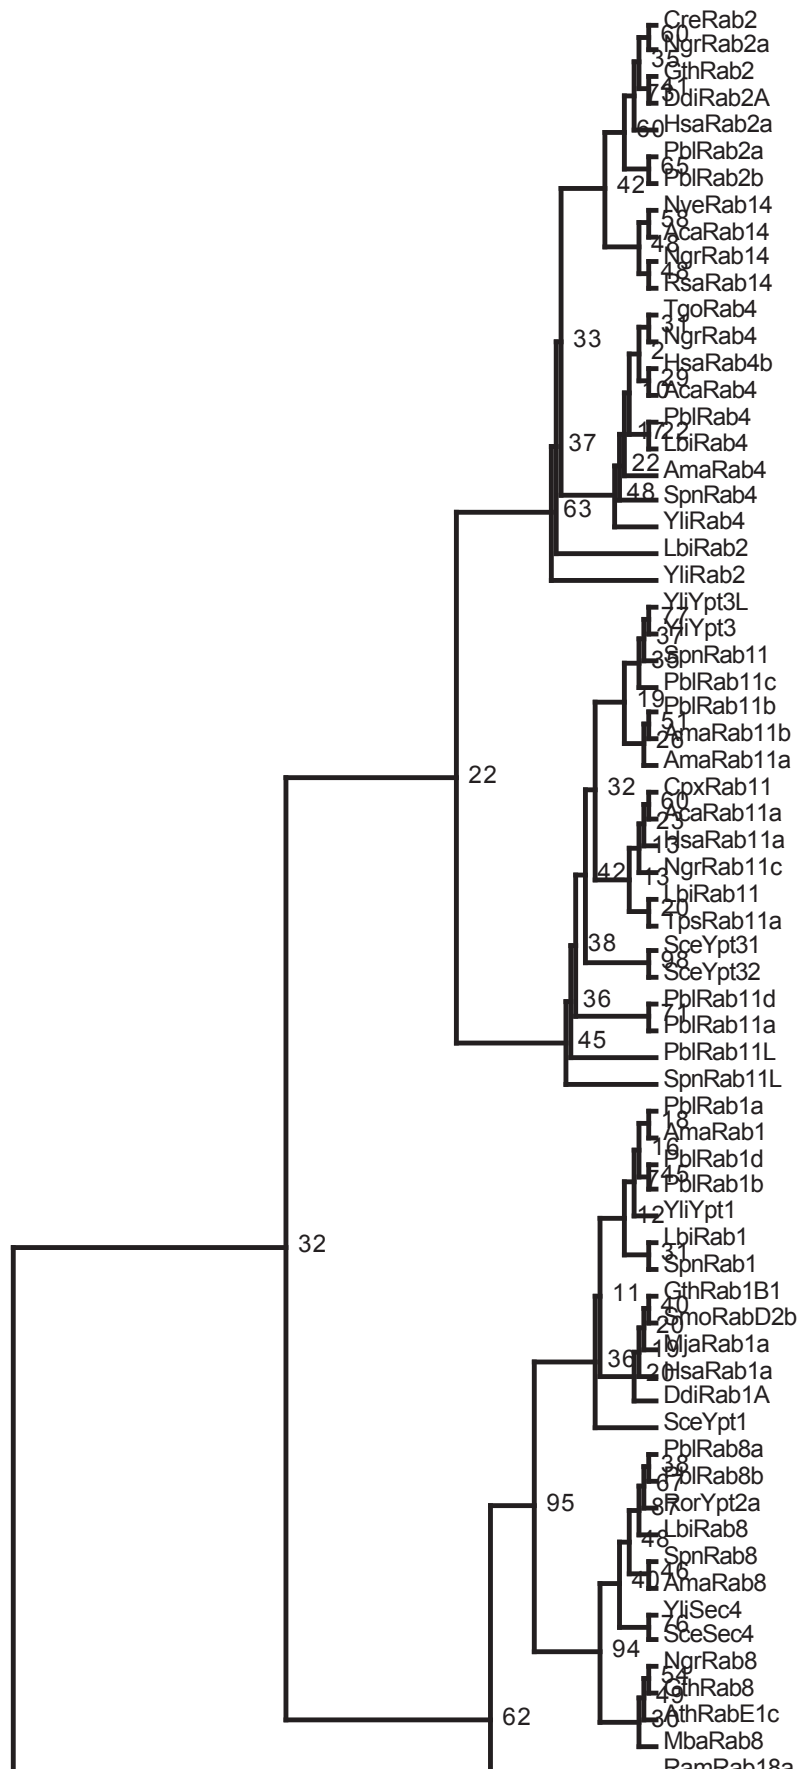

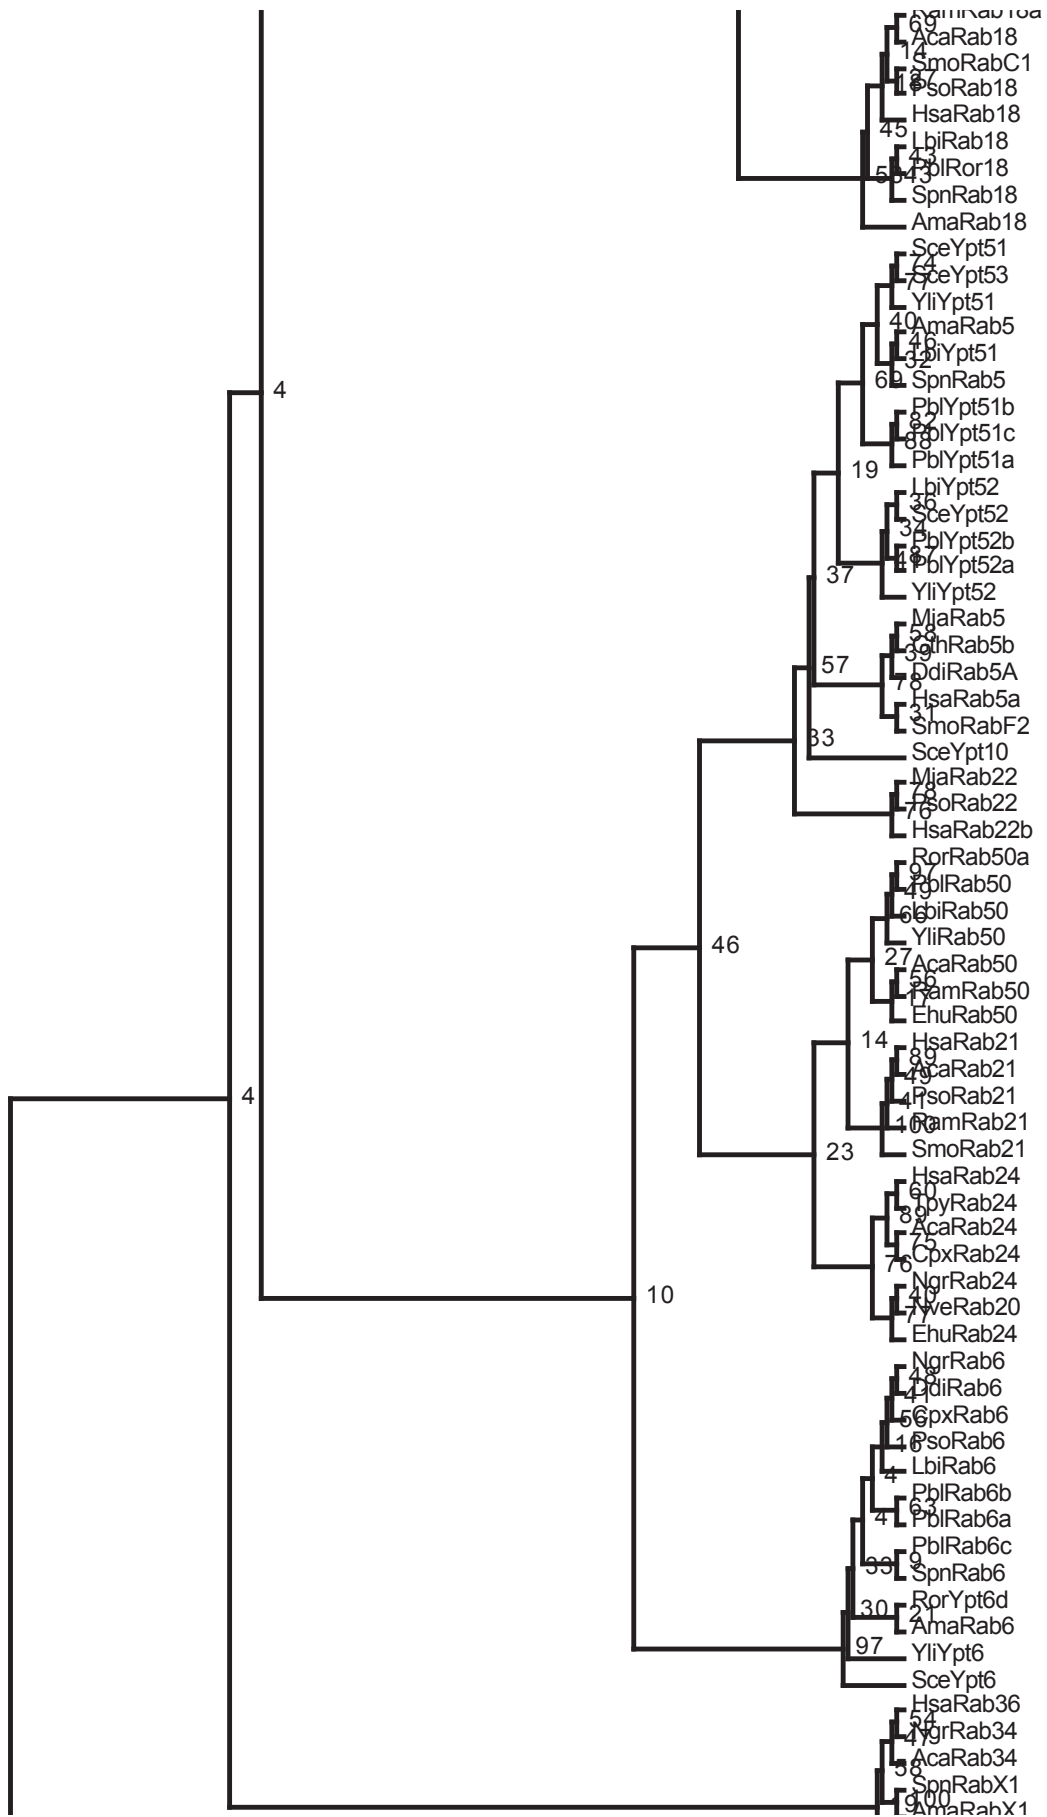



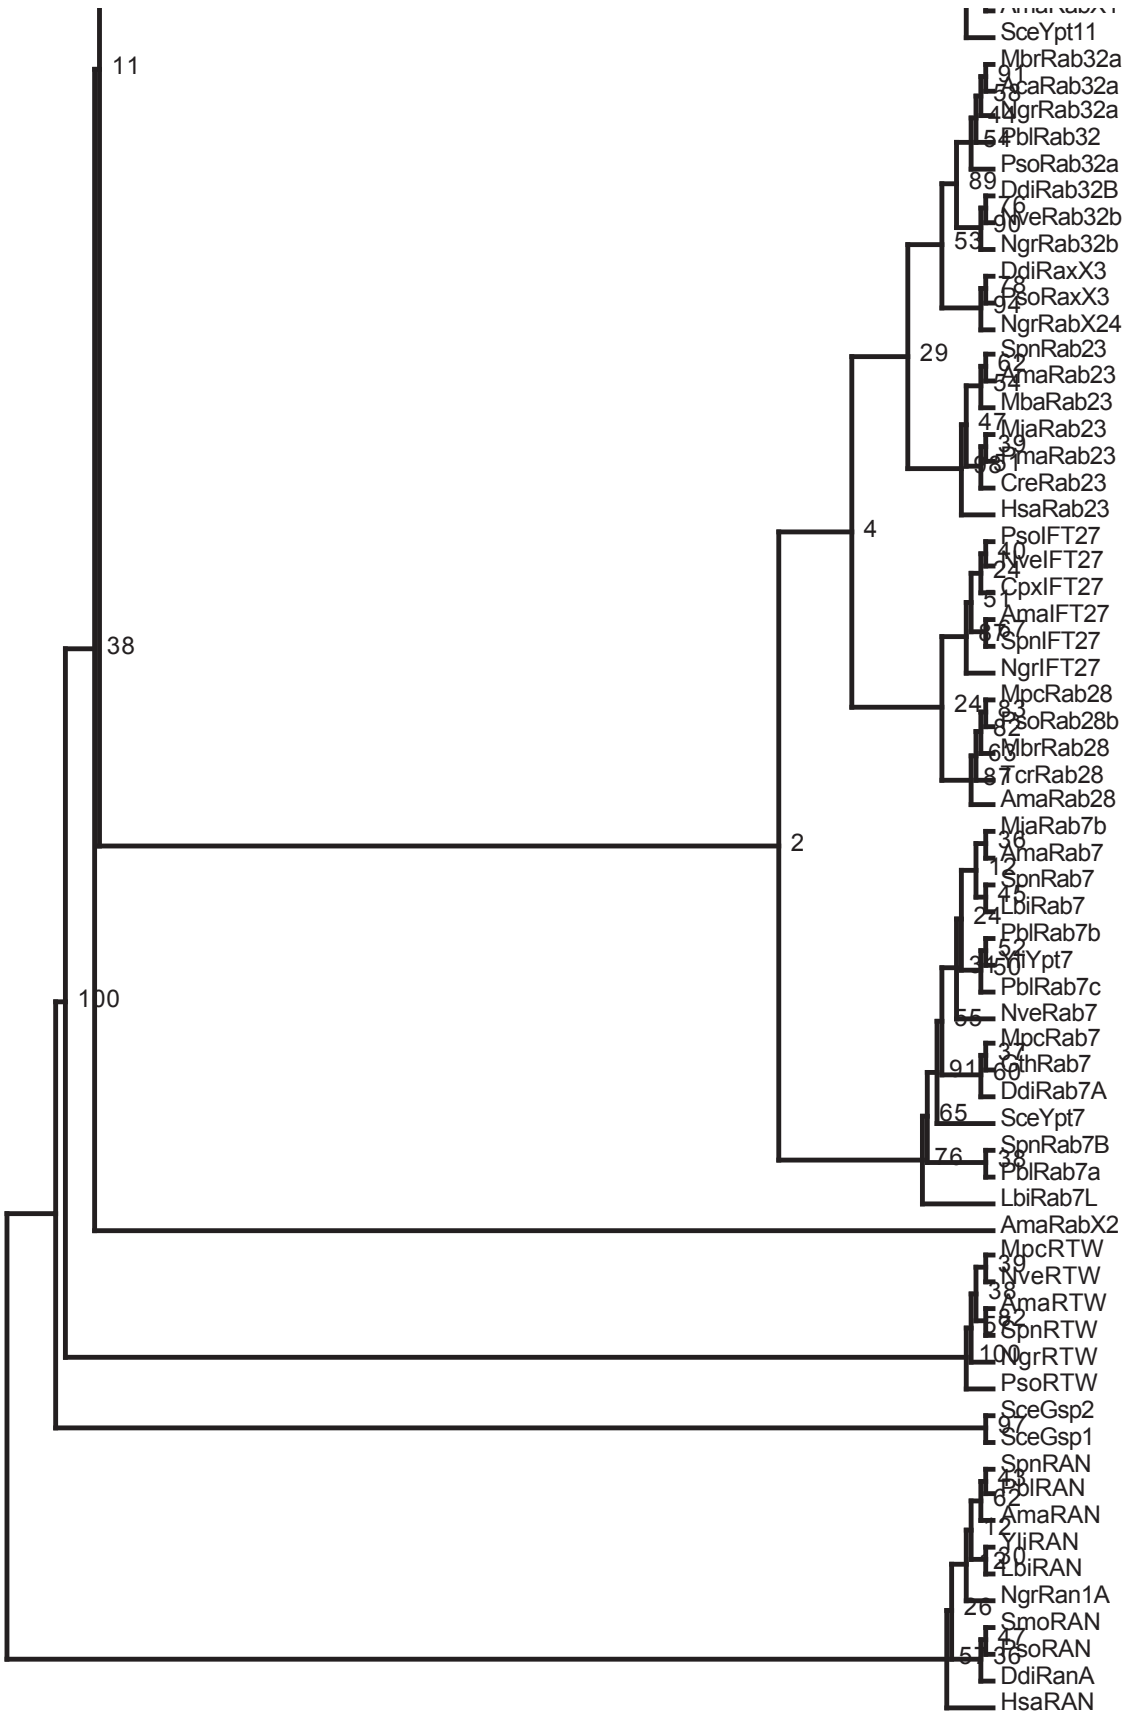

Supplement: supp_125.10.2500_JCS101378FigS12.pdf [file supp_125.10.2500_JCS101378FigS12.pdf]

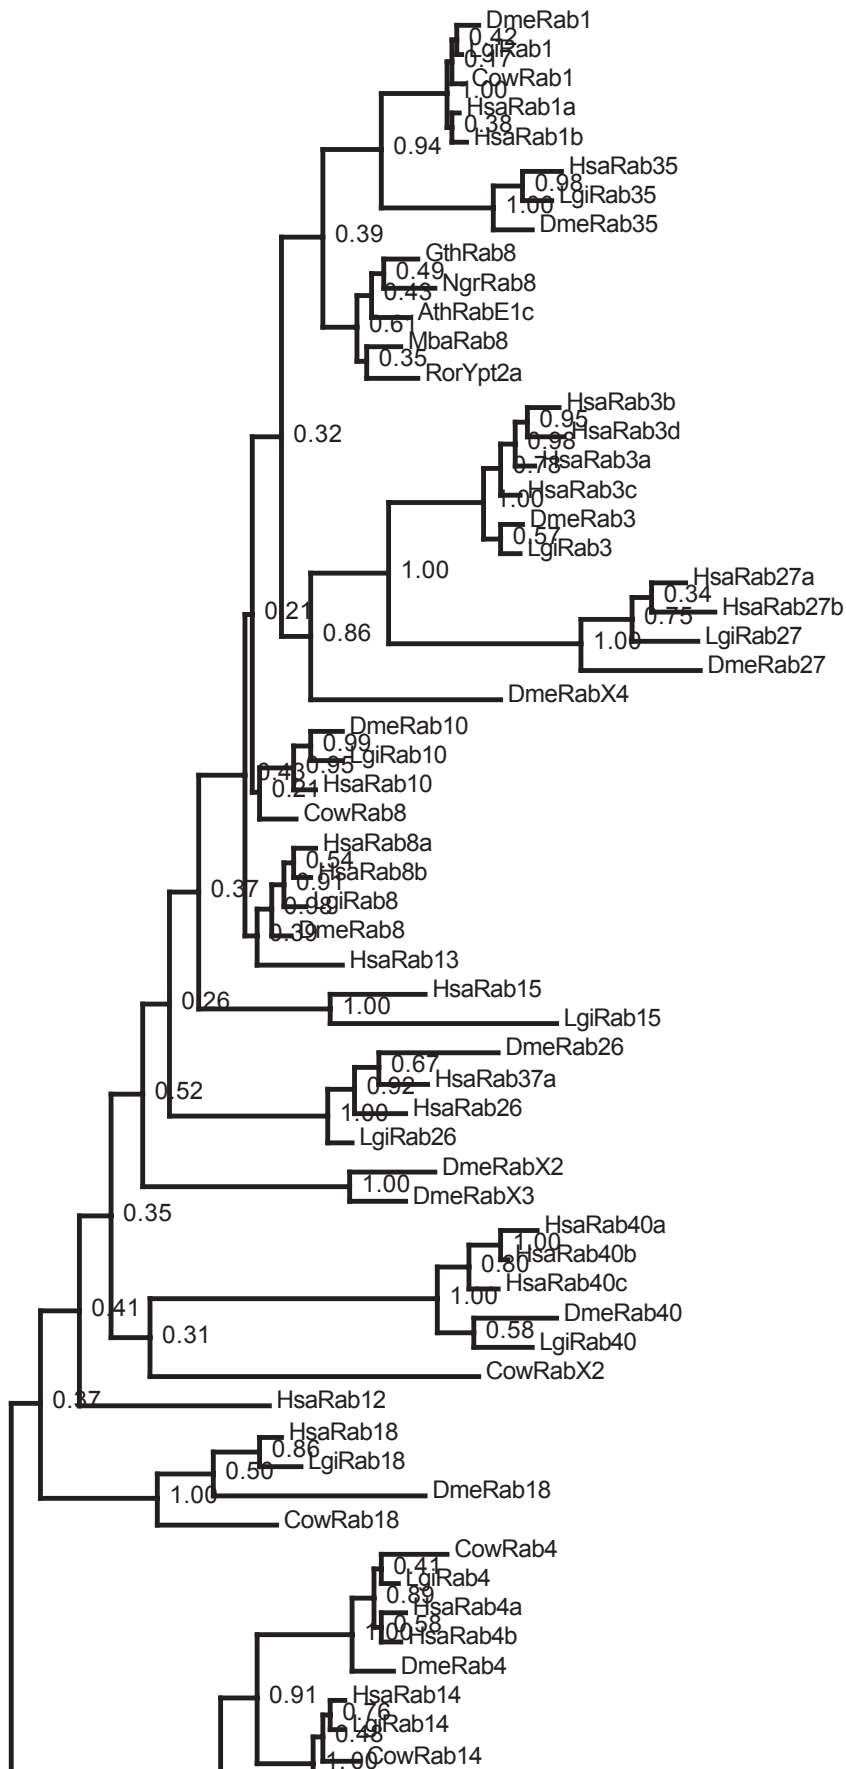

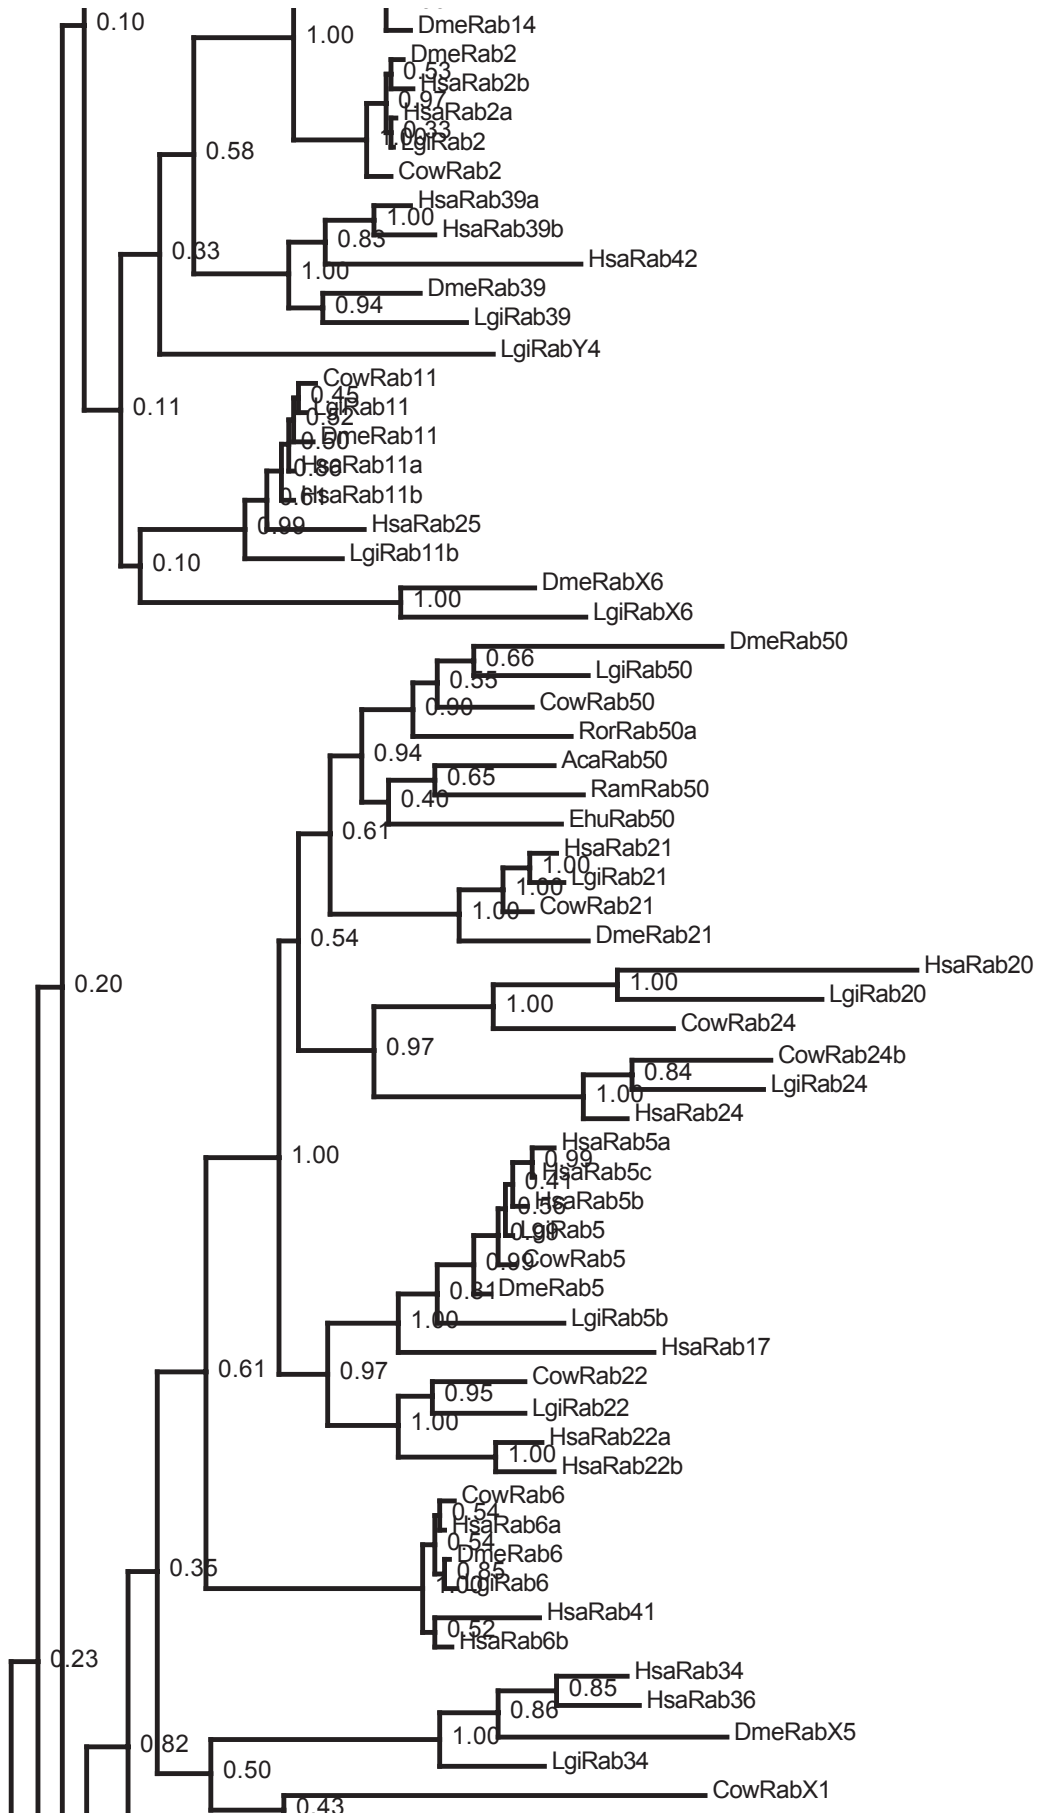

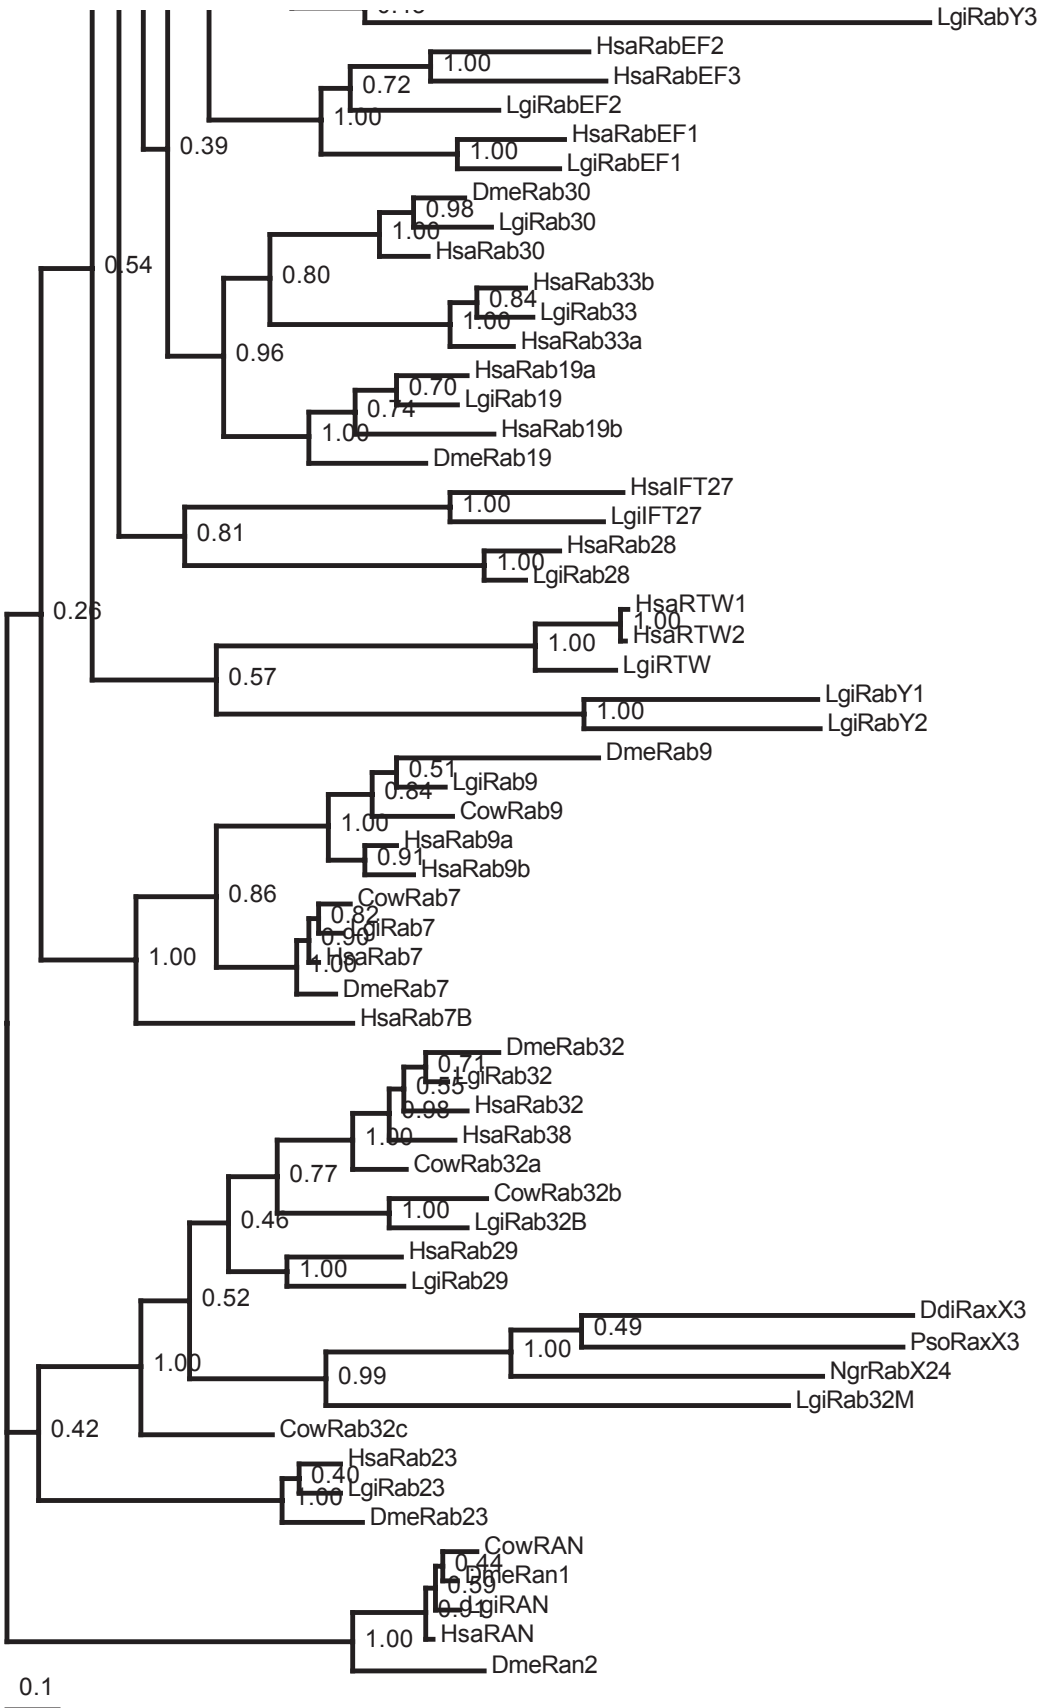

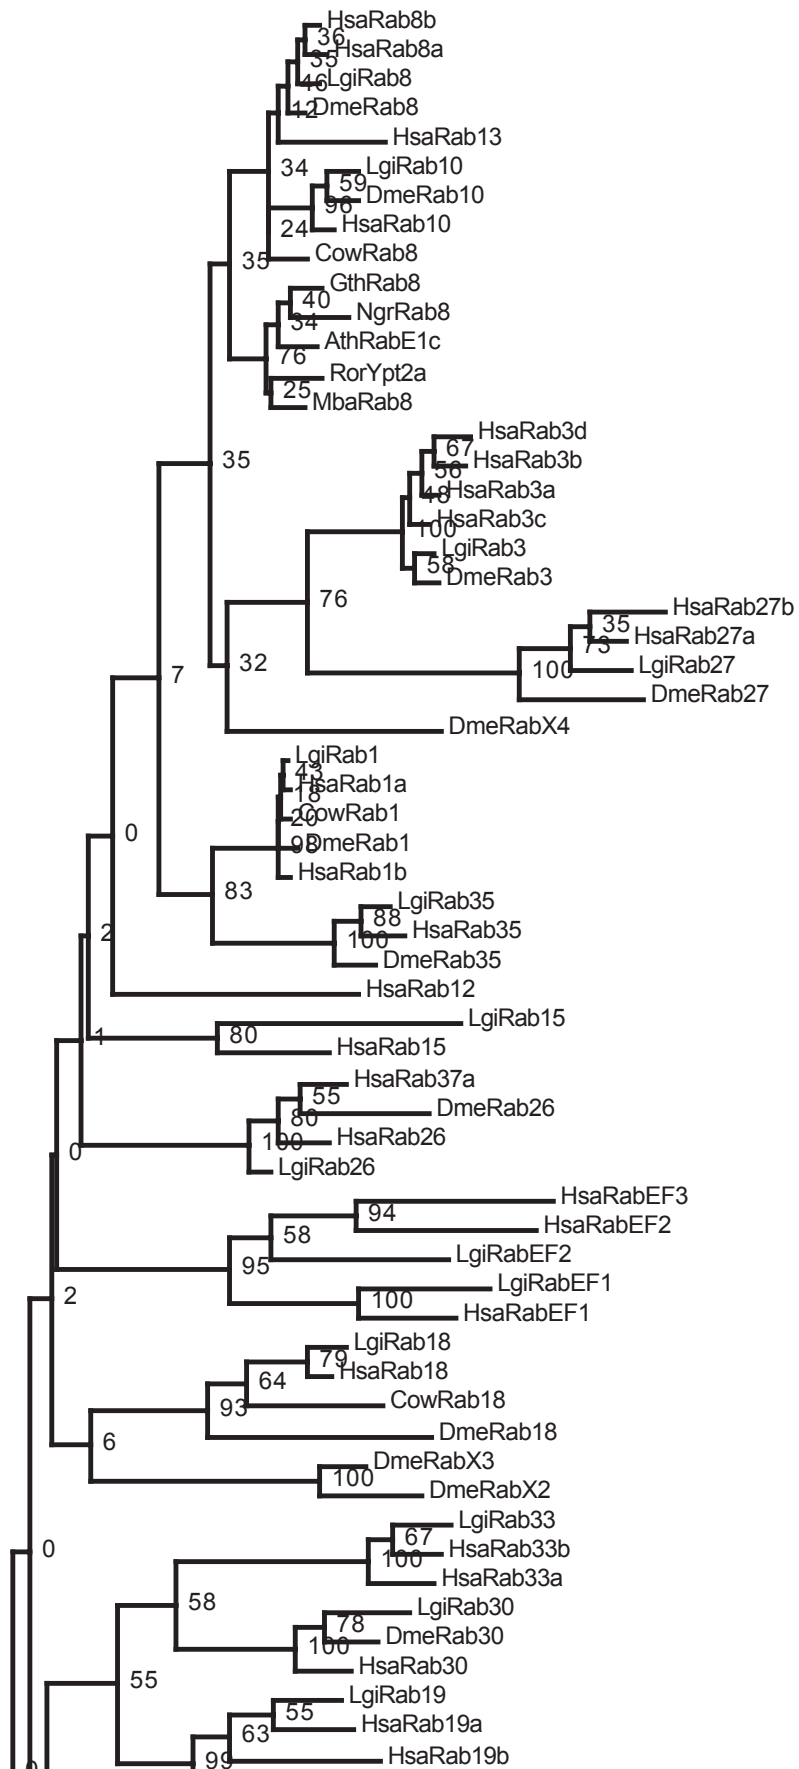

Elias et. al. Figure S13: PhyML\_page1

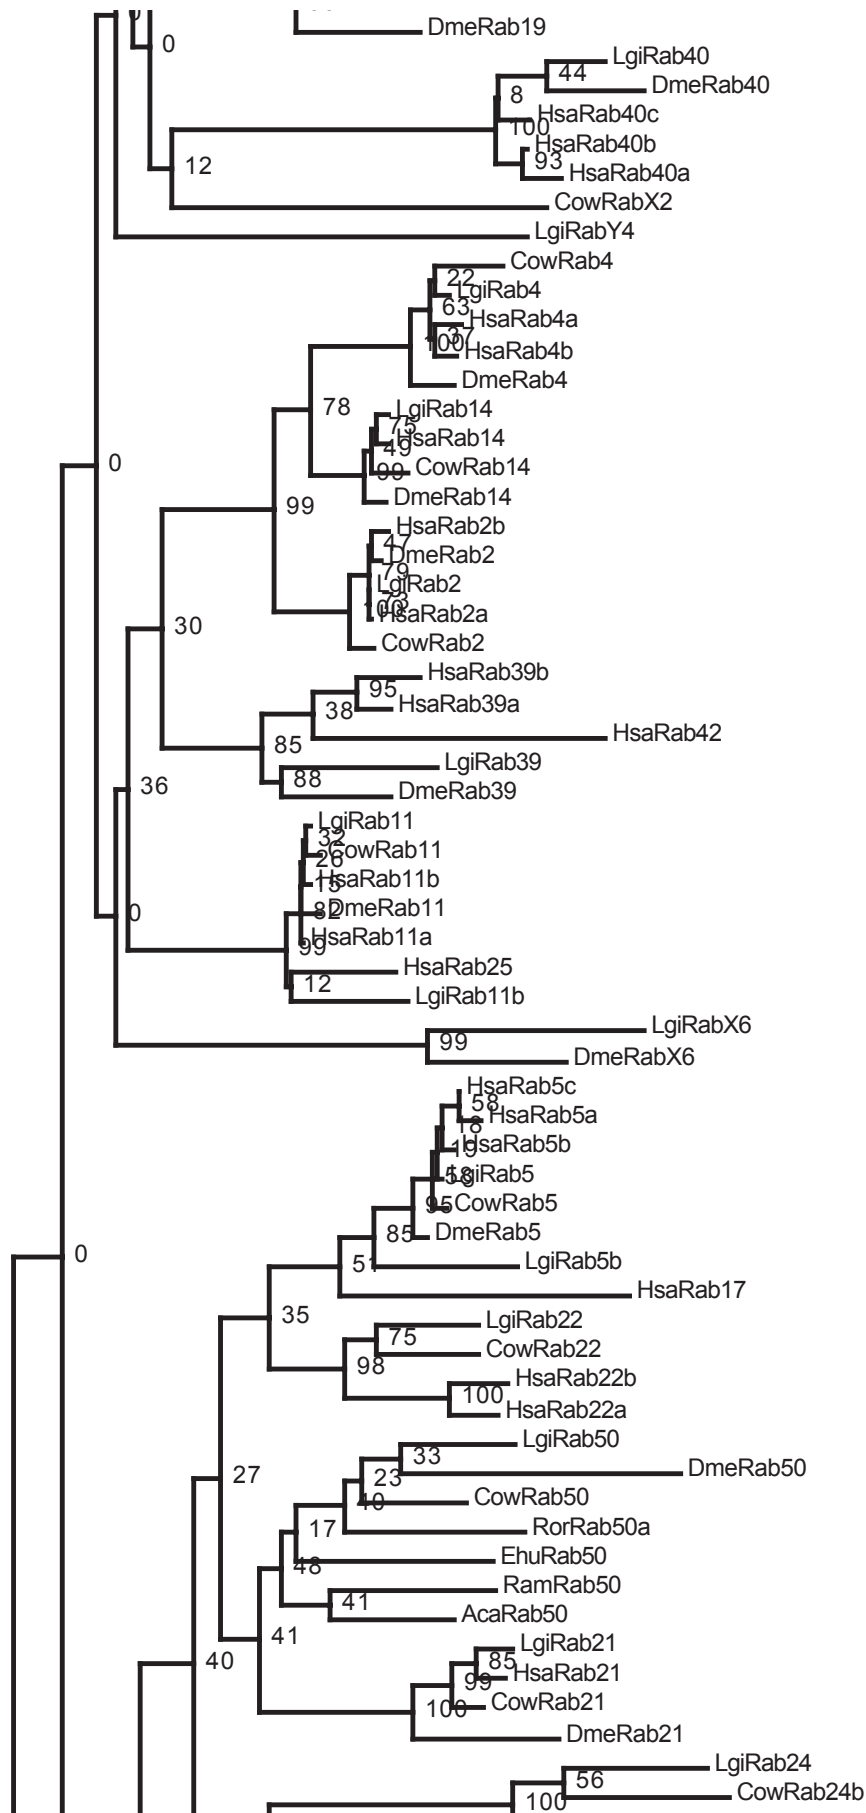

Elias et. al. Figure S13: PhyML\_page2

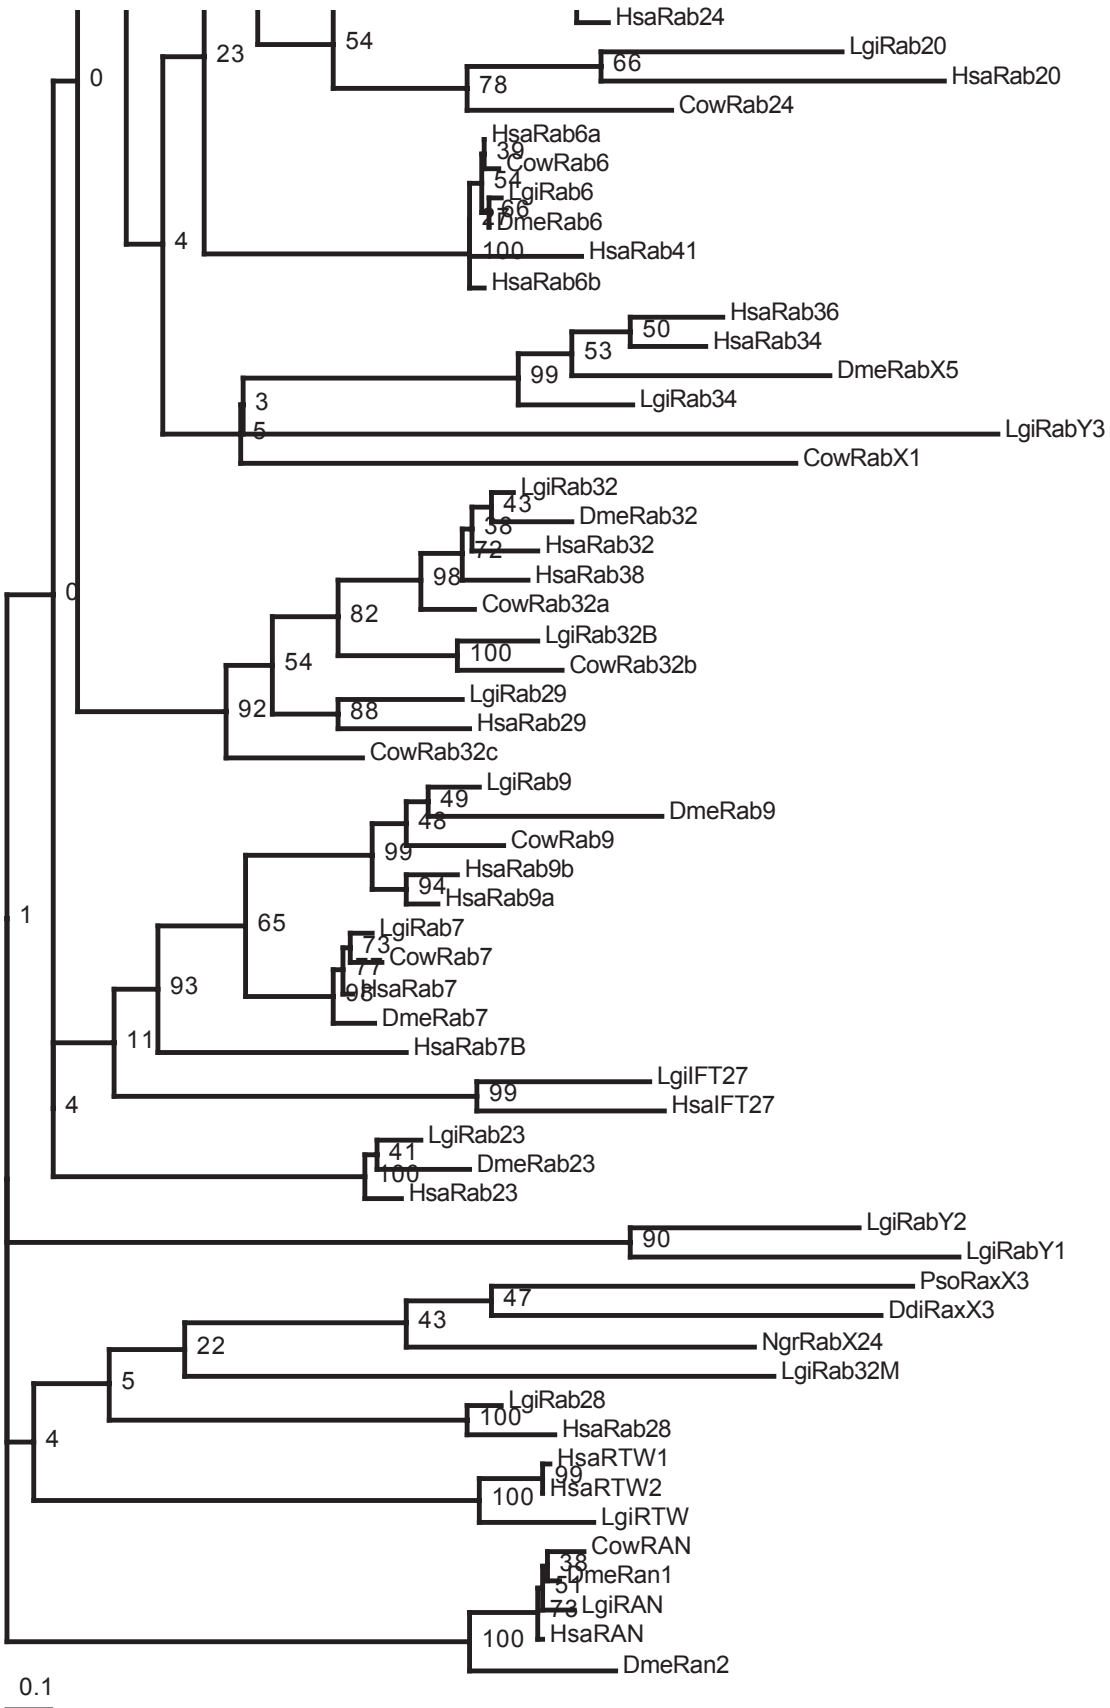

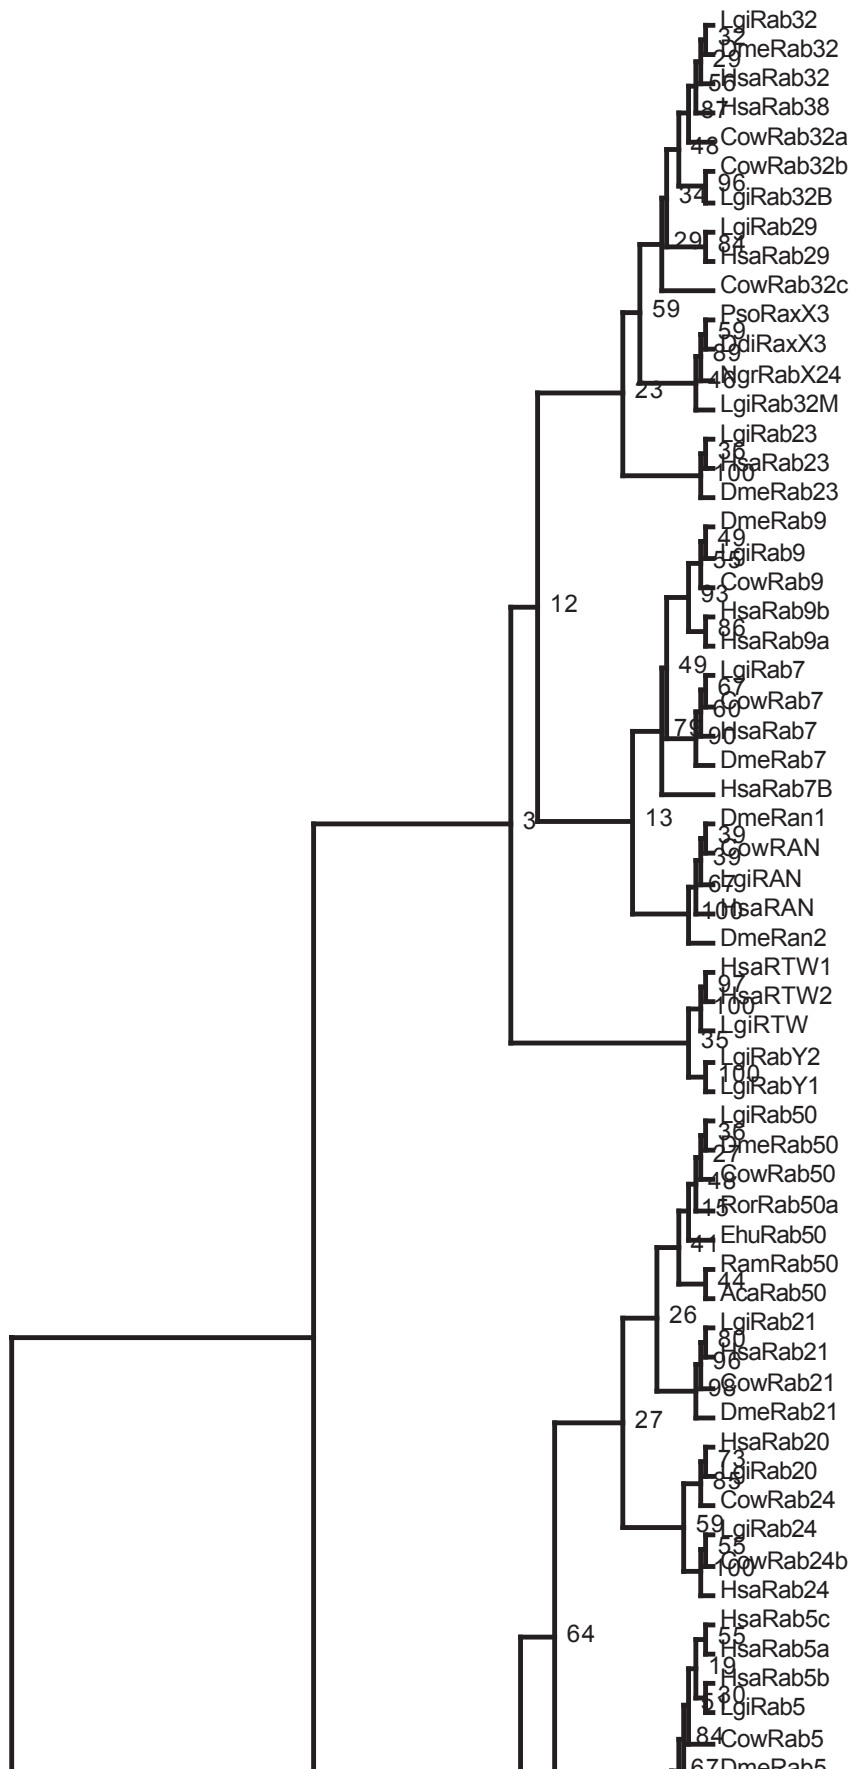

Elias et. al. Figure S13: RAXML\_page1





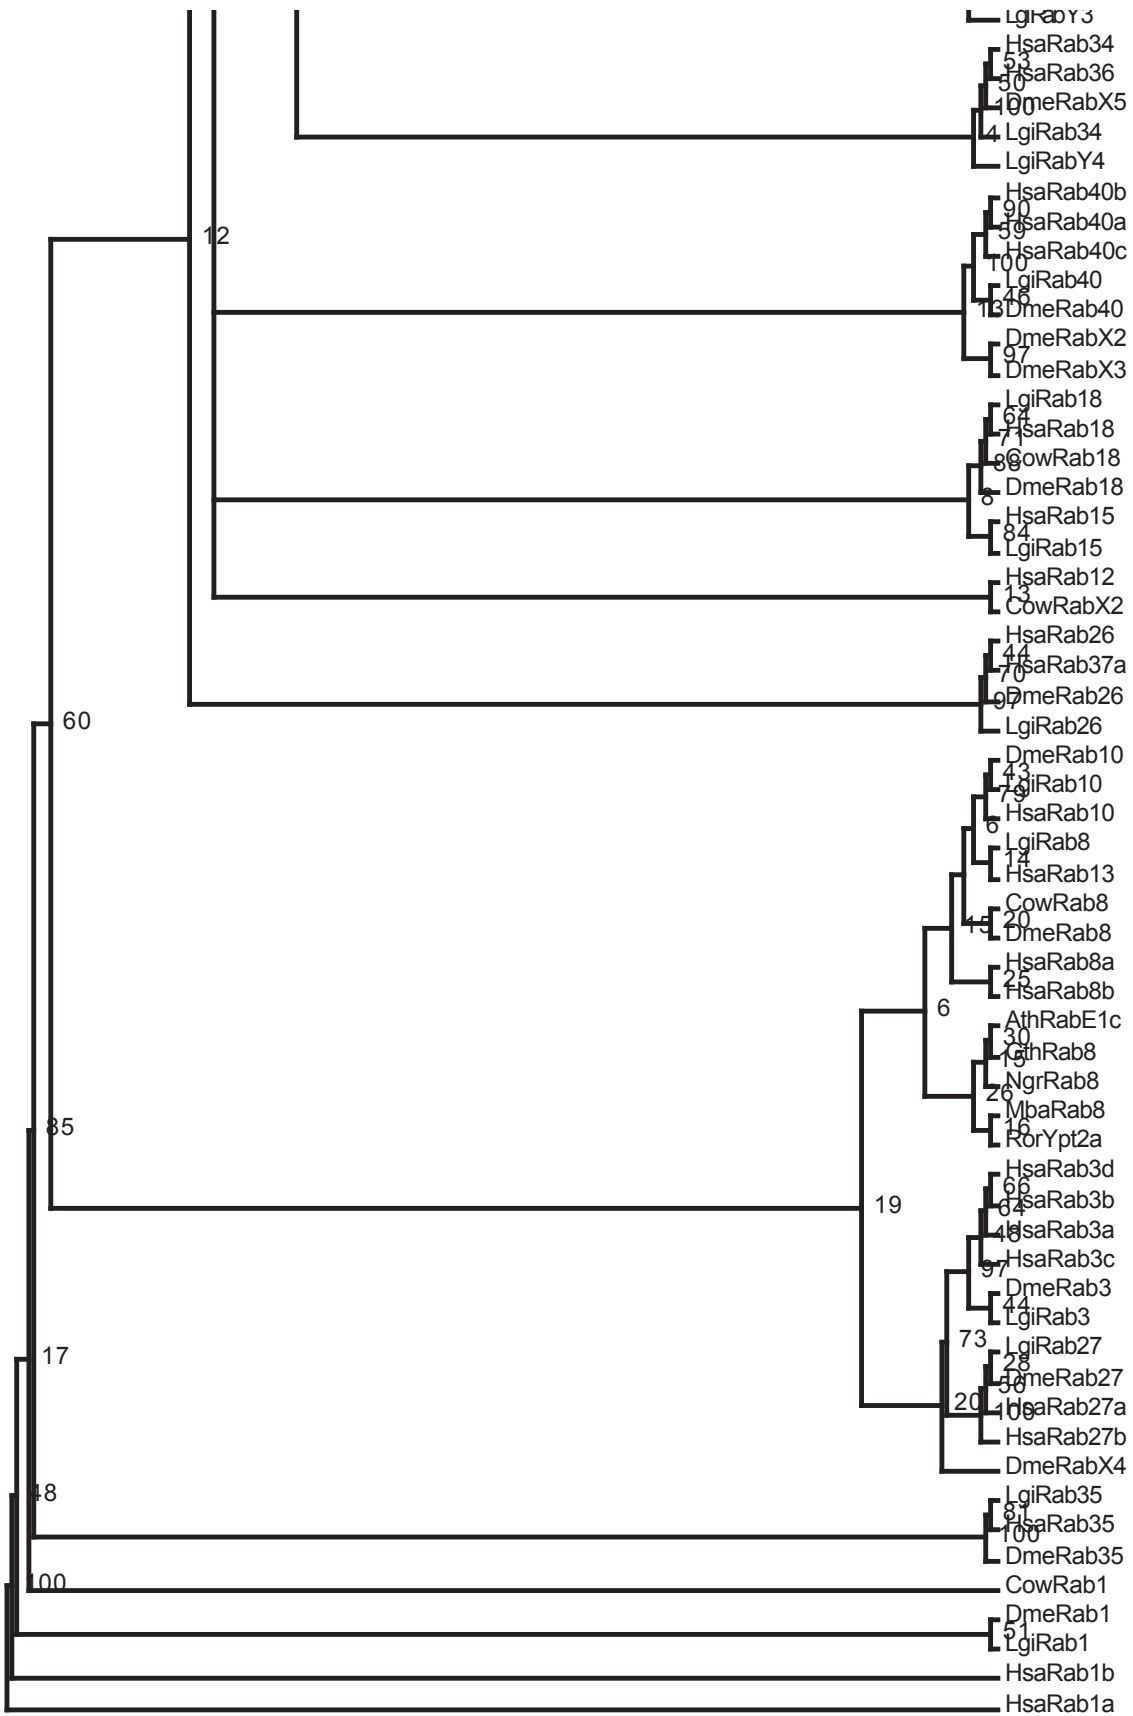

Supplement: supp_125.10.2500_JCS101378FigS13.pdf [file supp_125.10.2500_JCS101378FigS13.pdf]

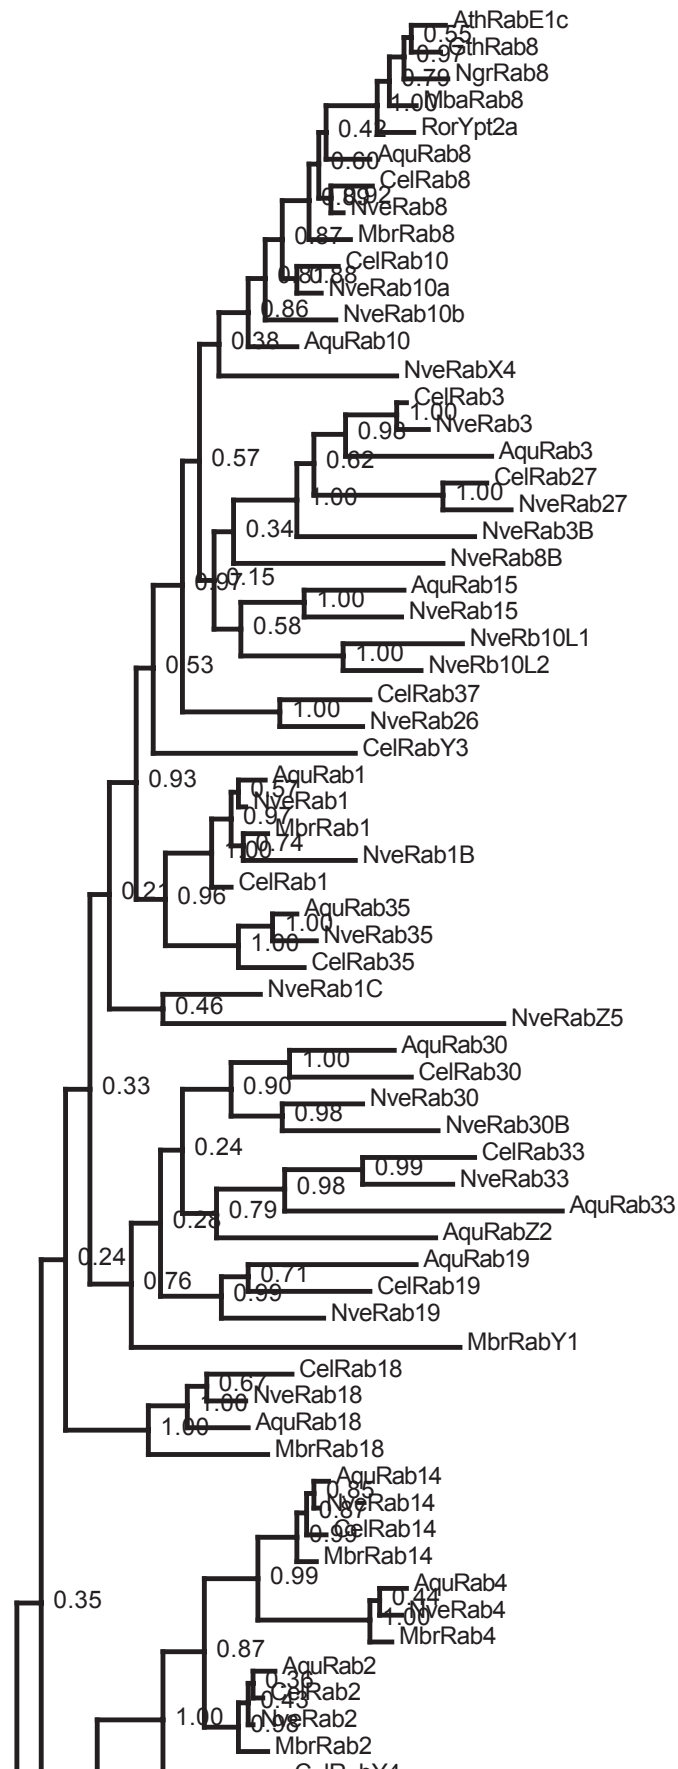

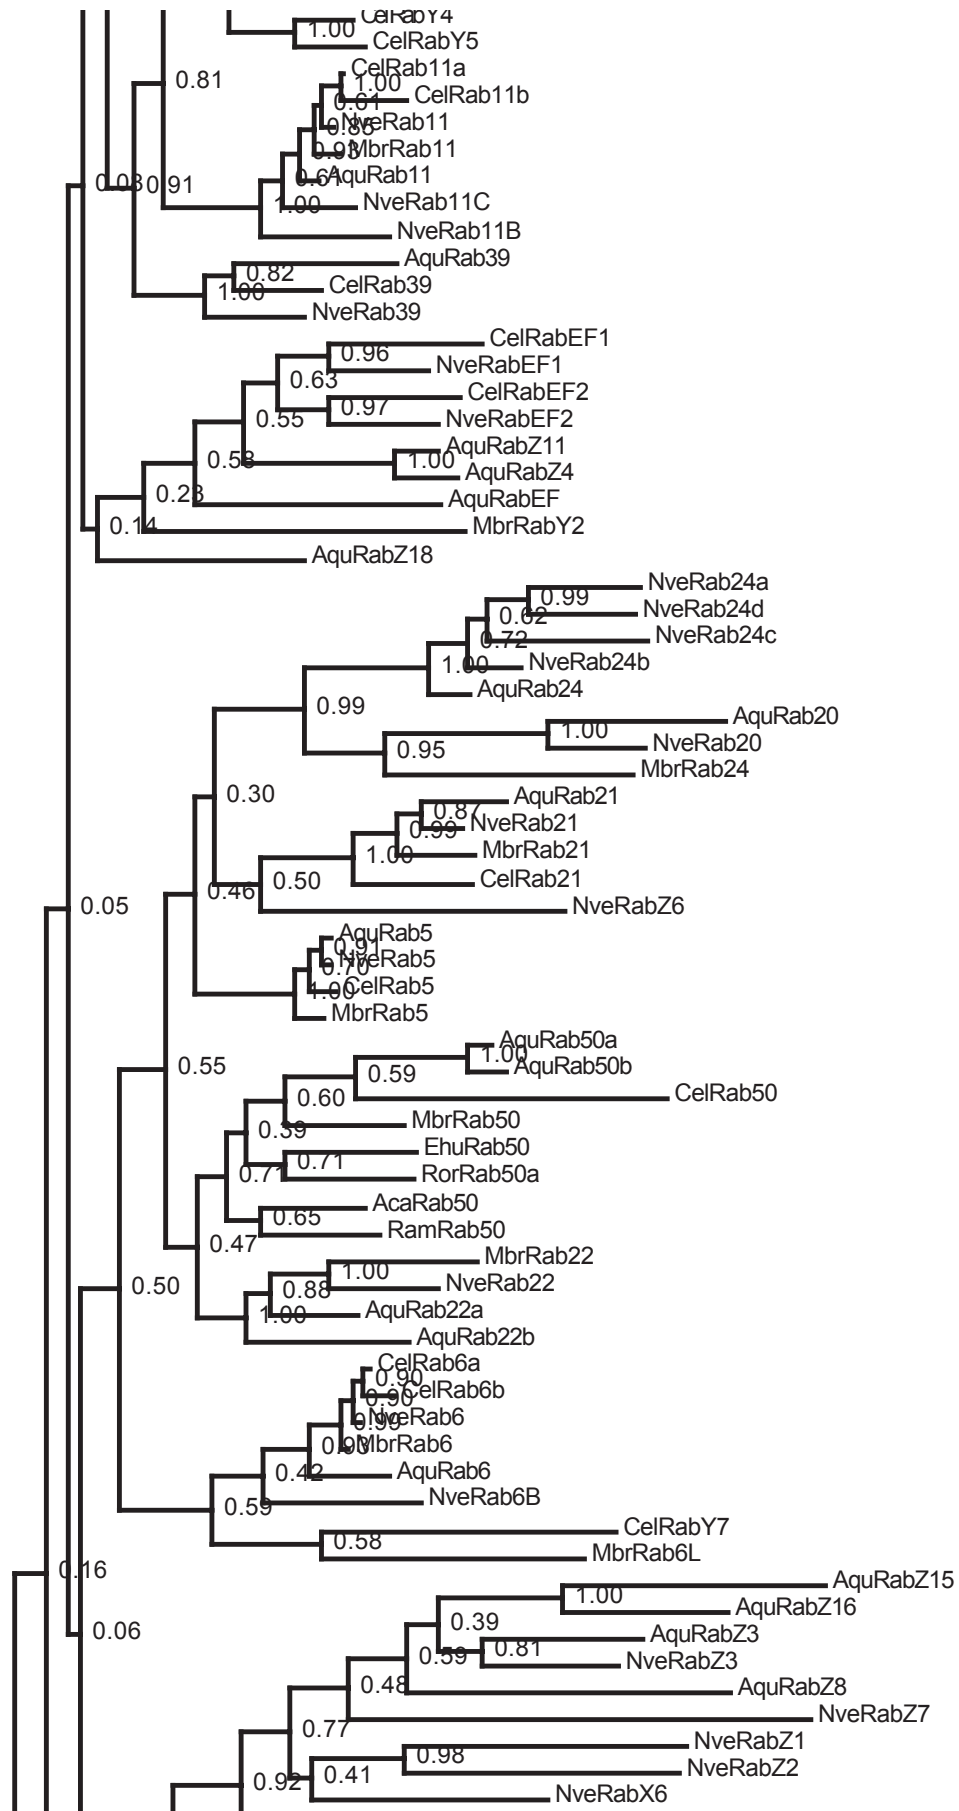

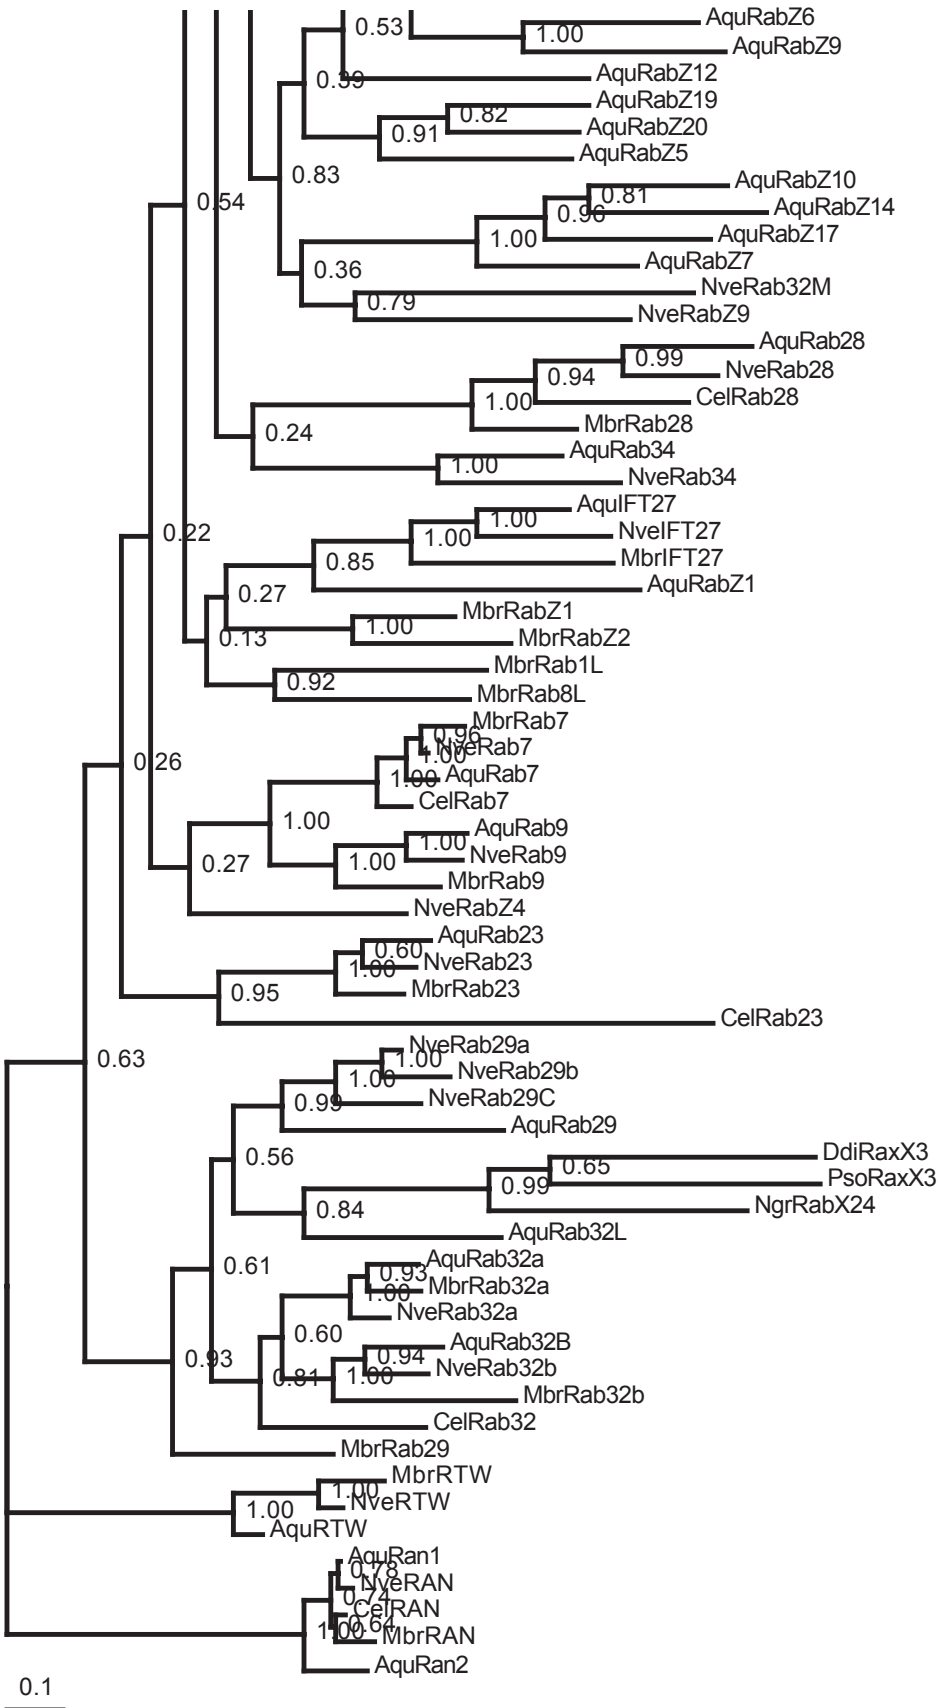

Elias et. al. Figure S14: MB\_page3

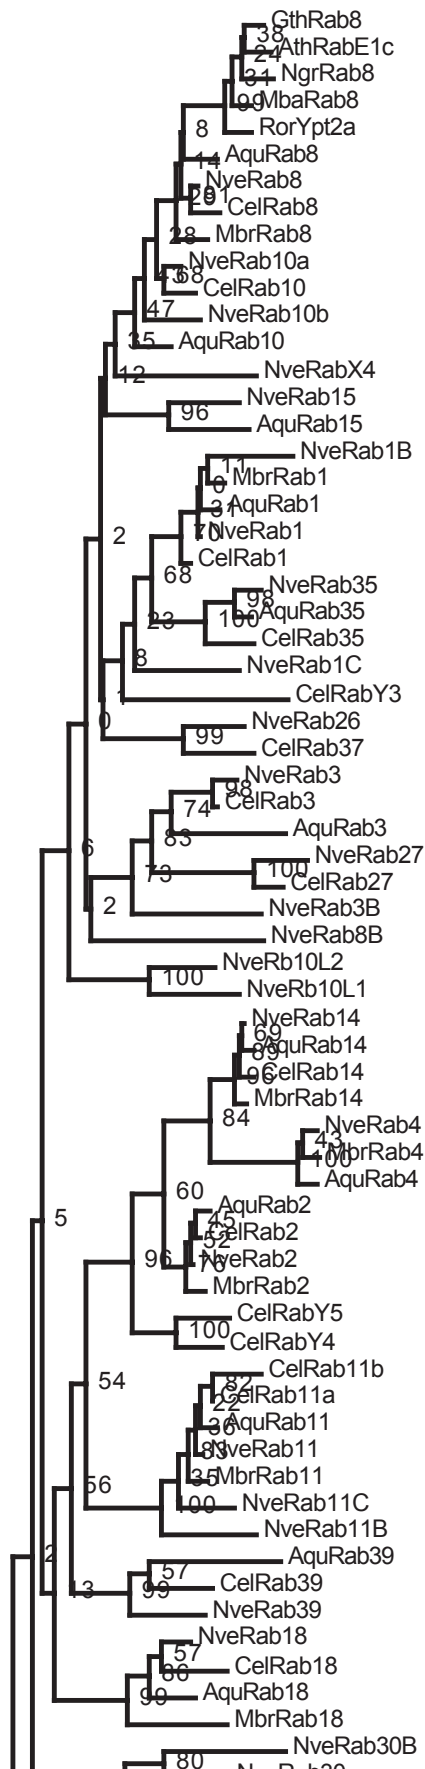

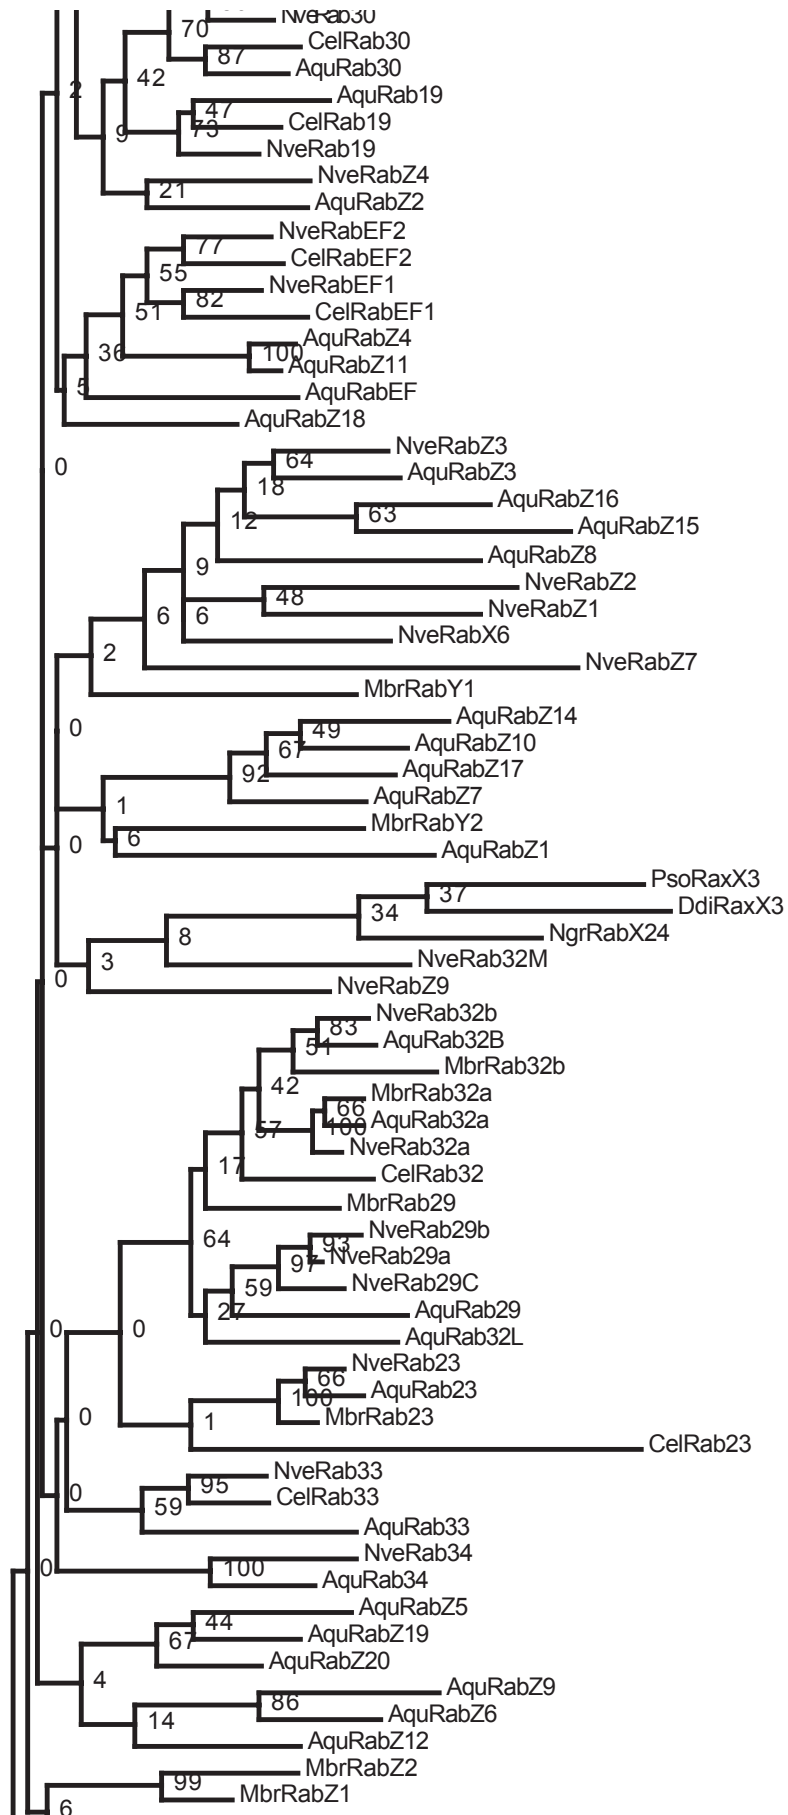

Elias et. al. Figure S14: PhyML\_page2

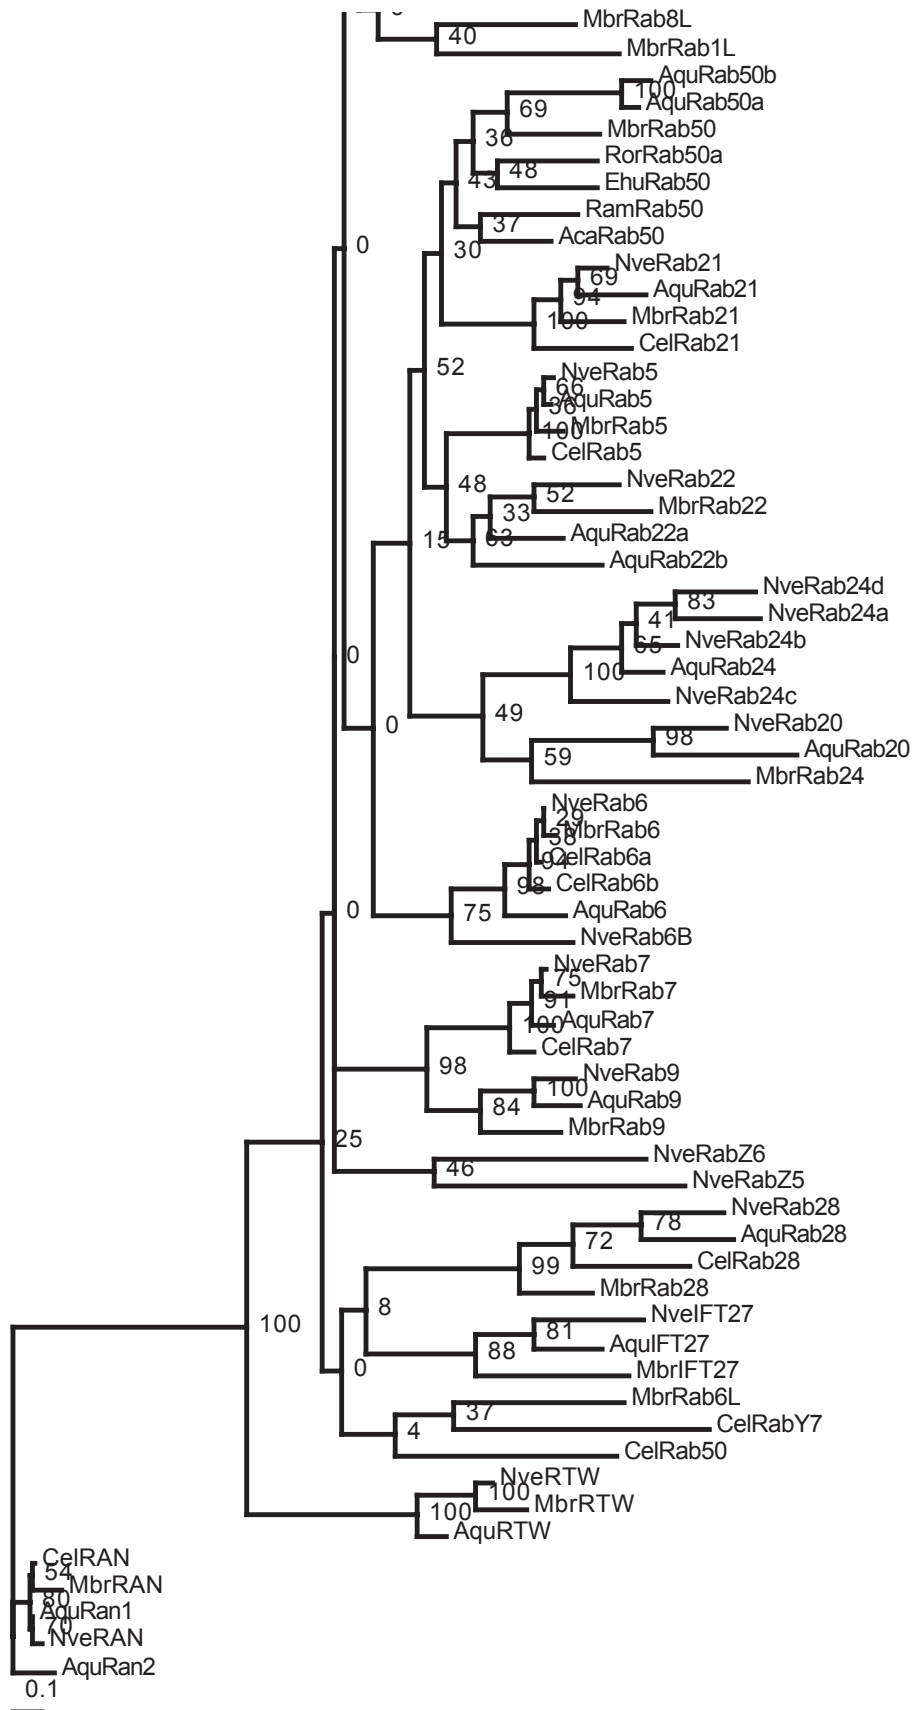

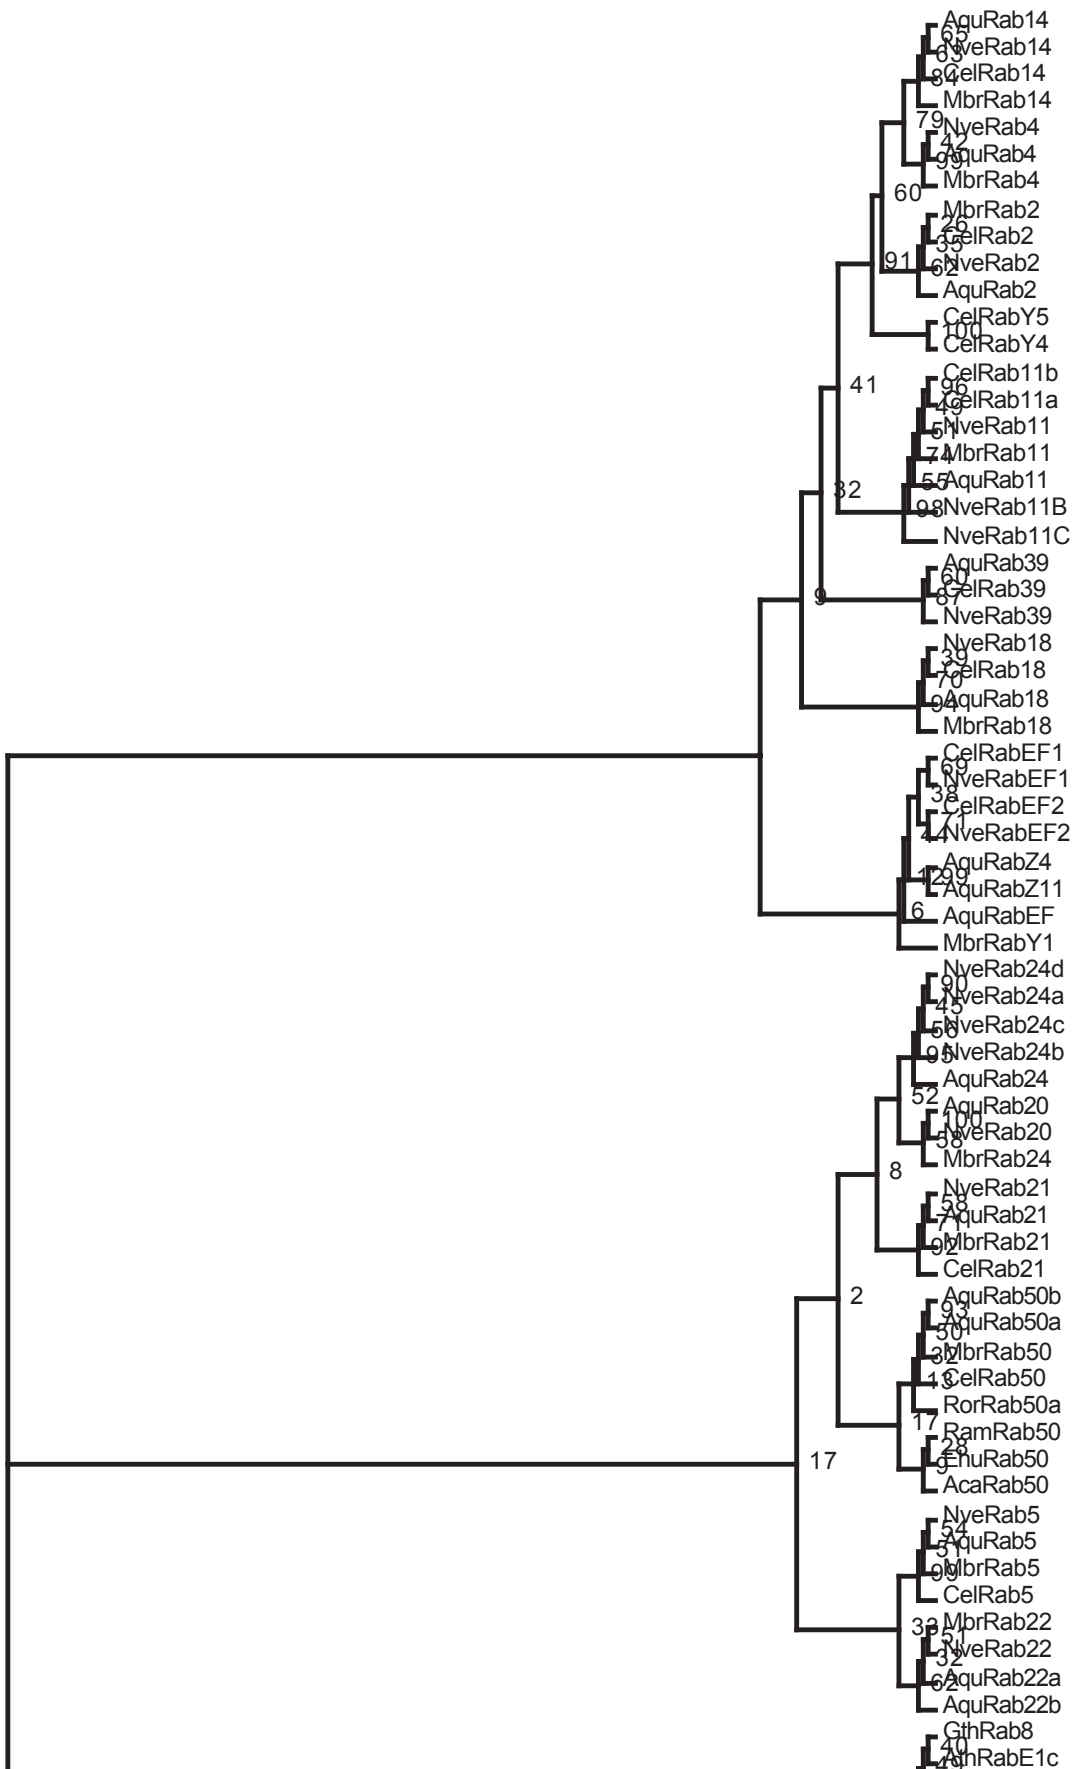

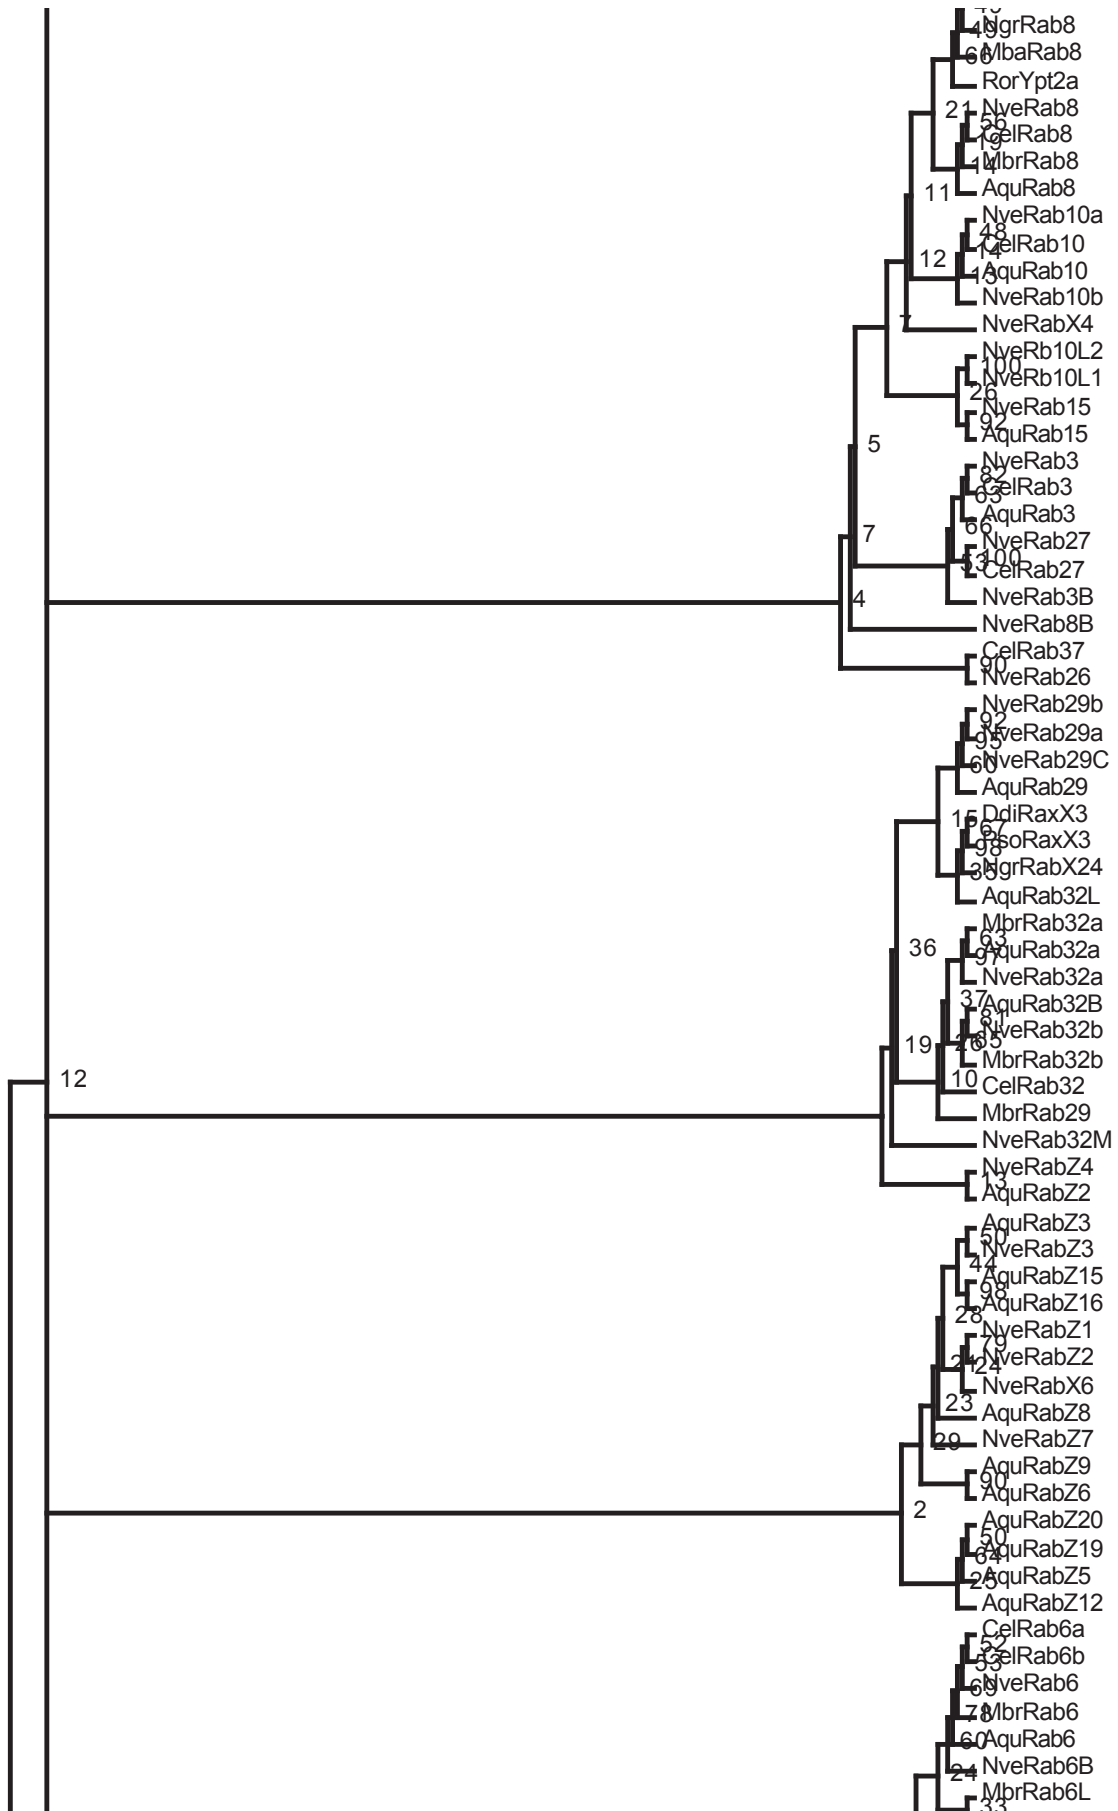



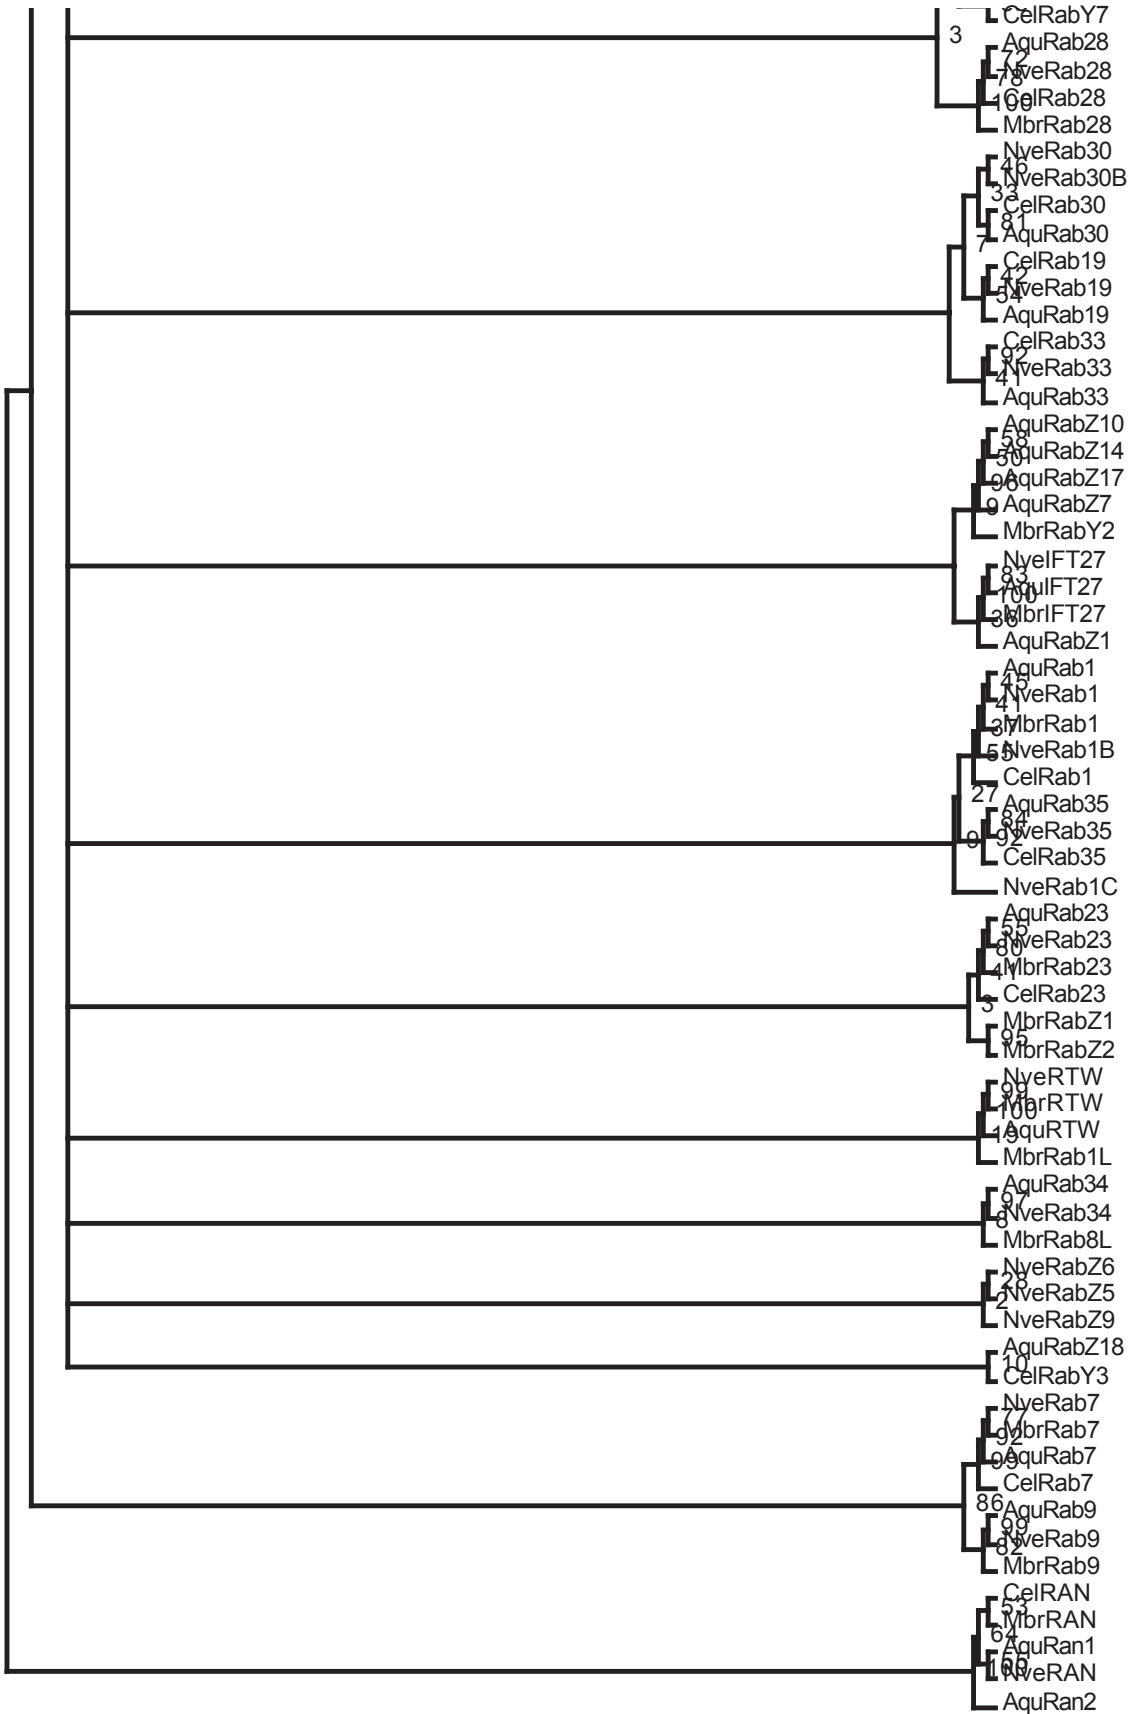

Supplement: supp_125.10.2500_JCS101378FigS14.pdf [file supp_125.10.2500_JCS101378FigS14.pdf]

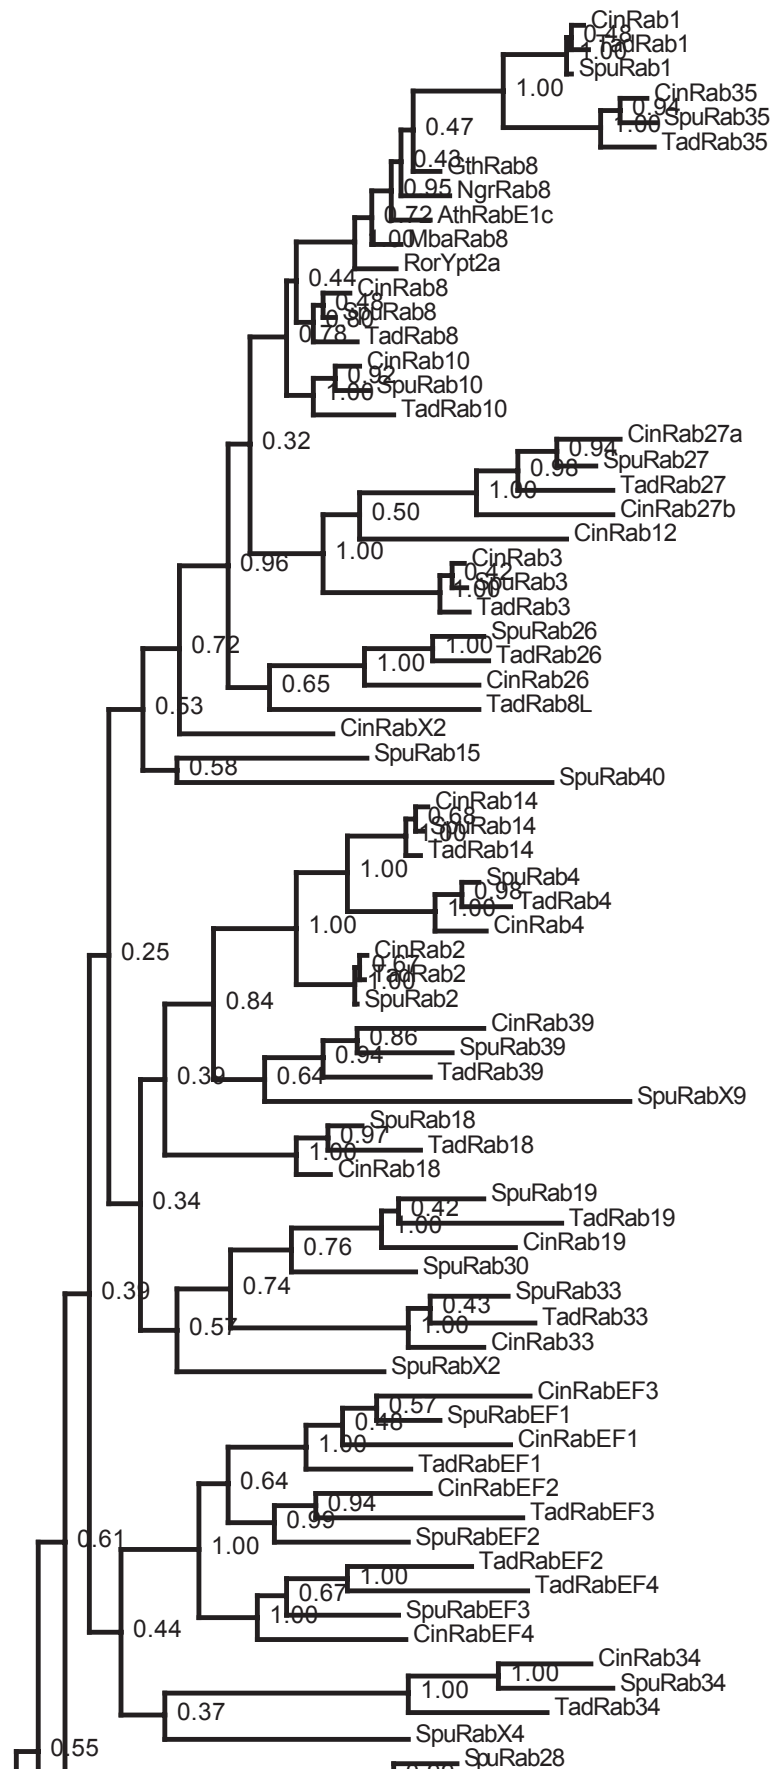

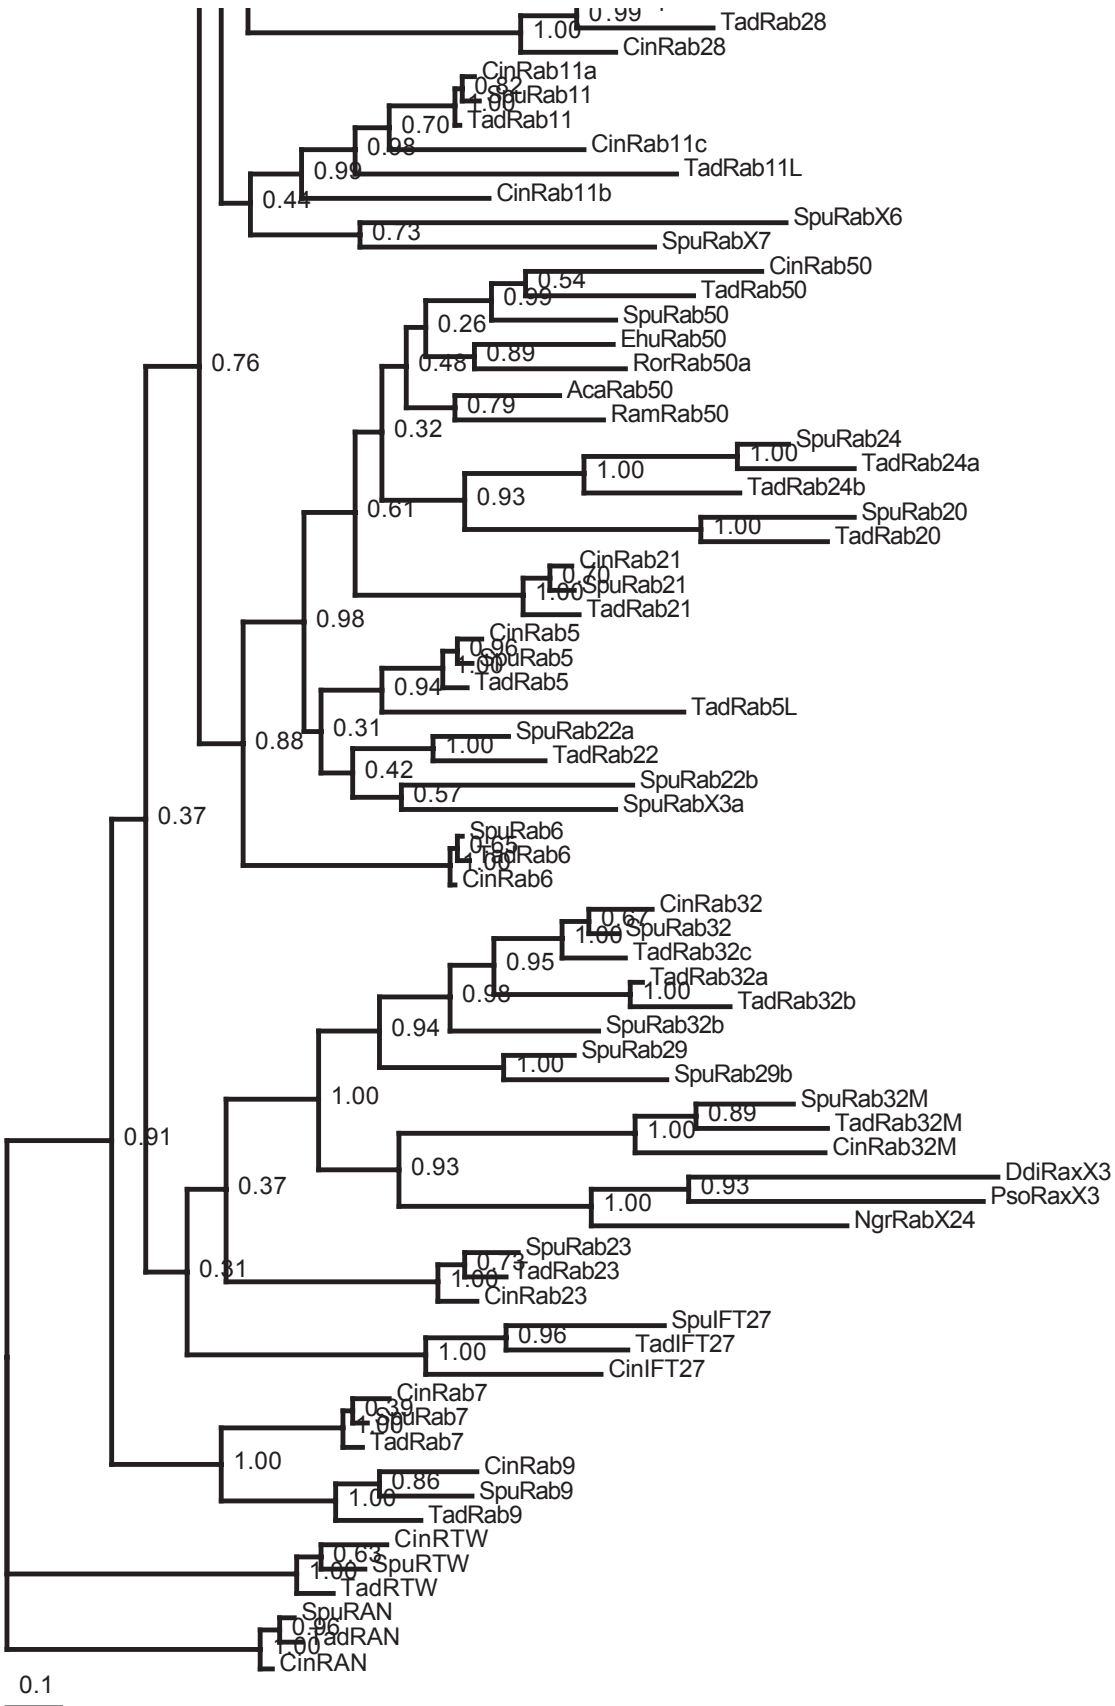

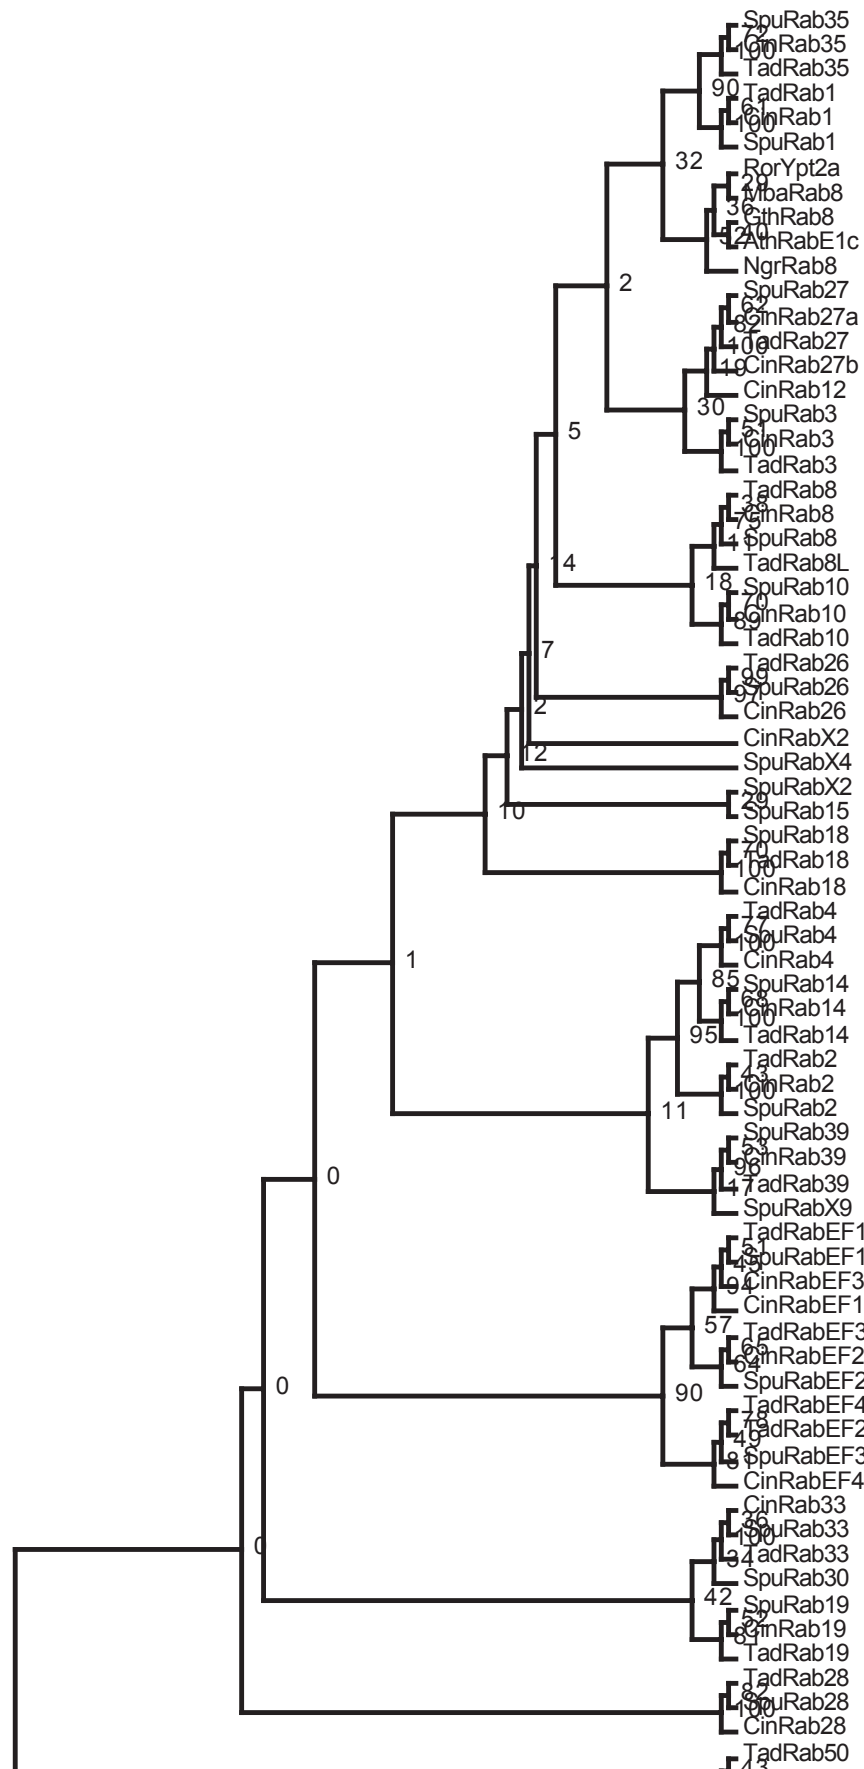

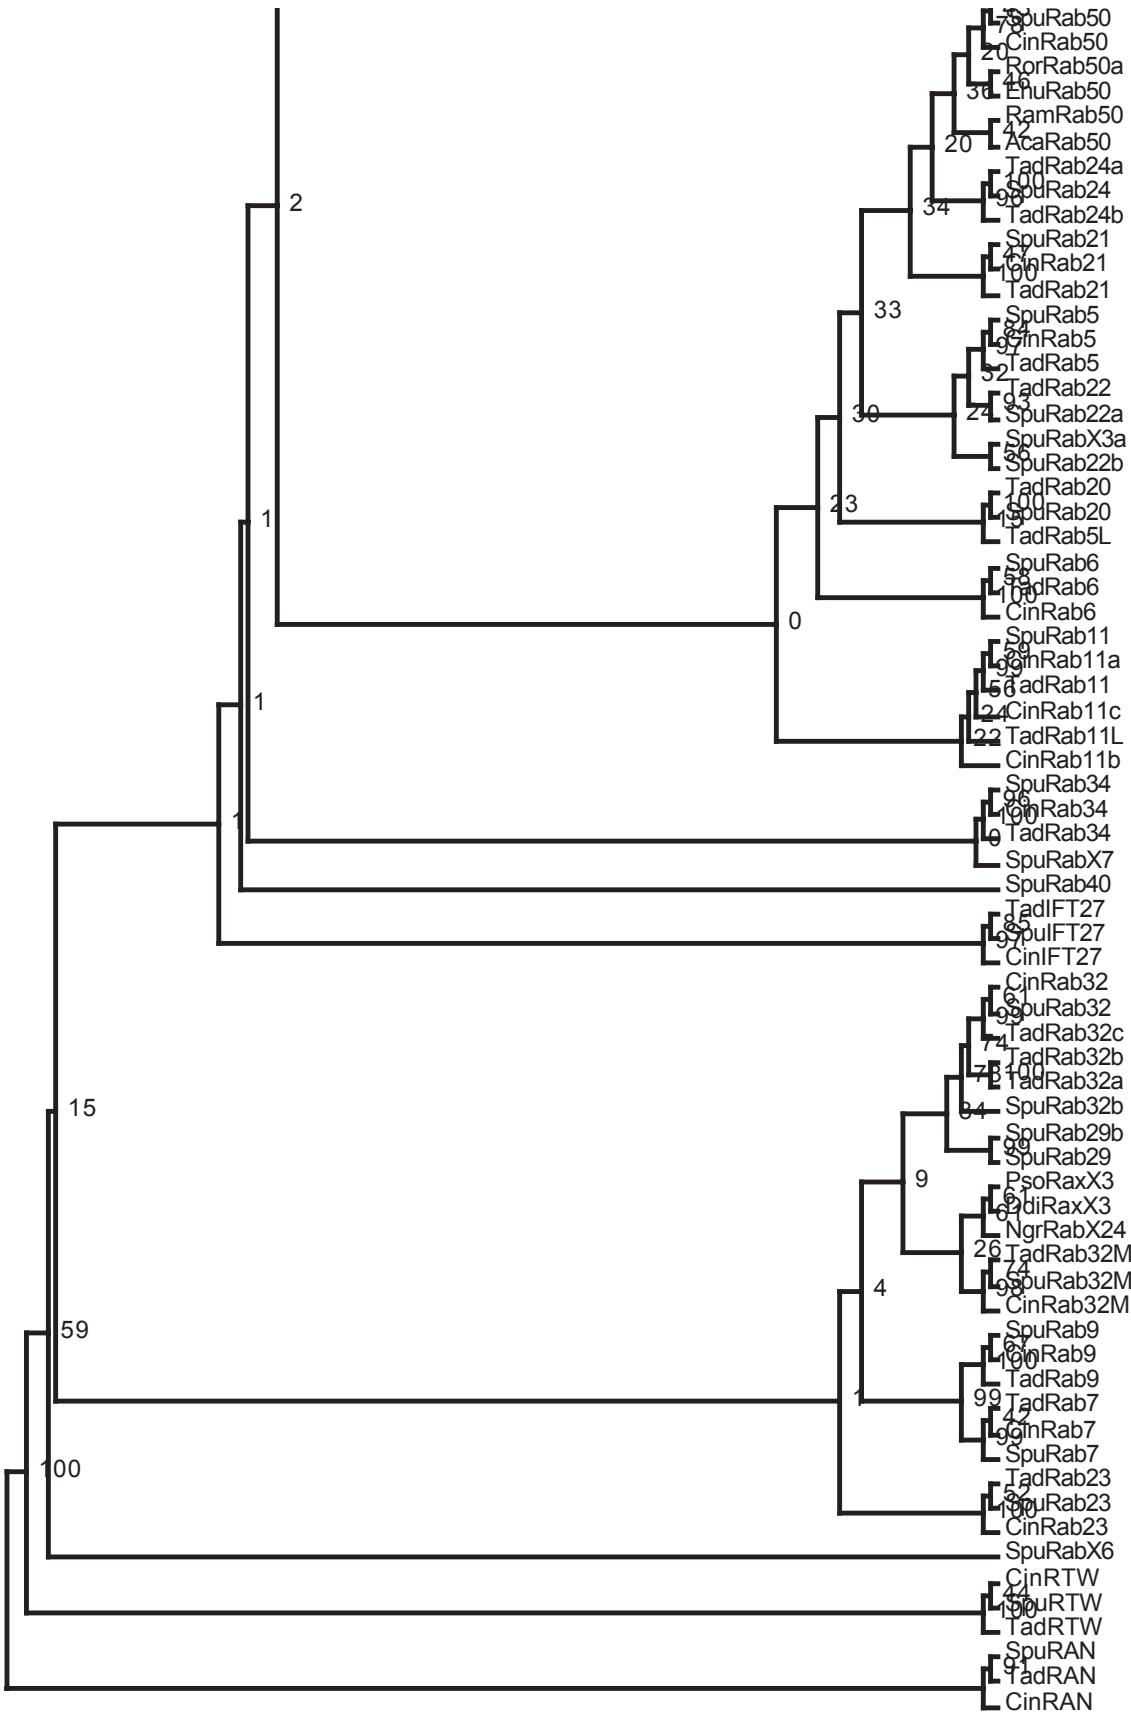

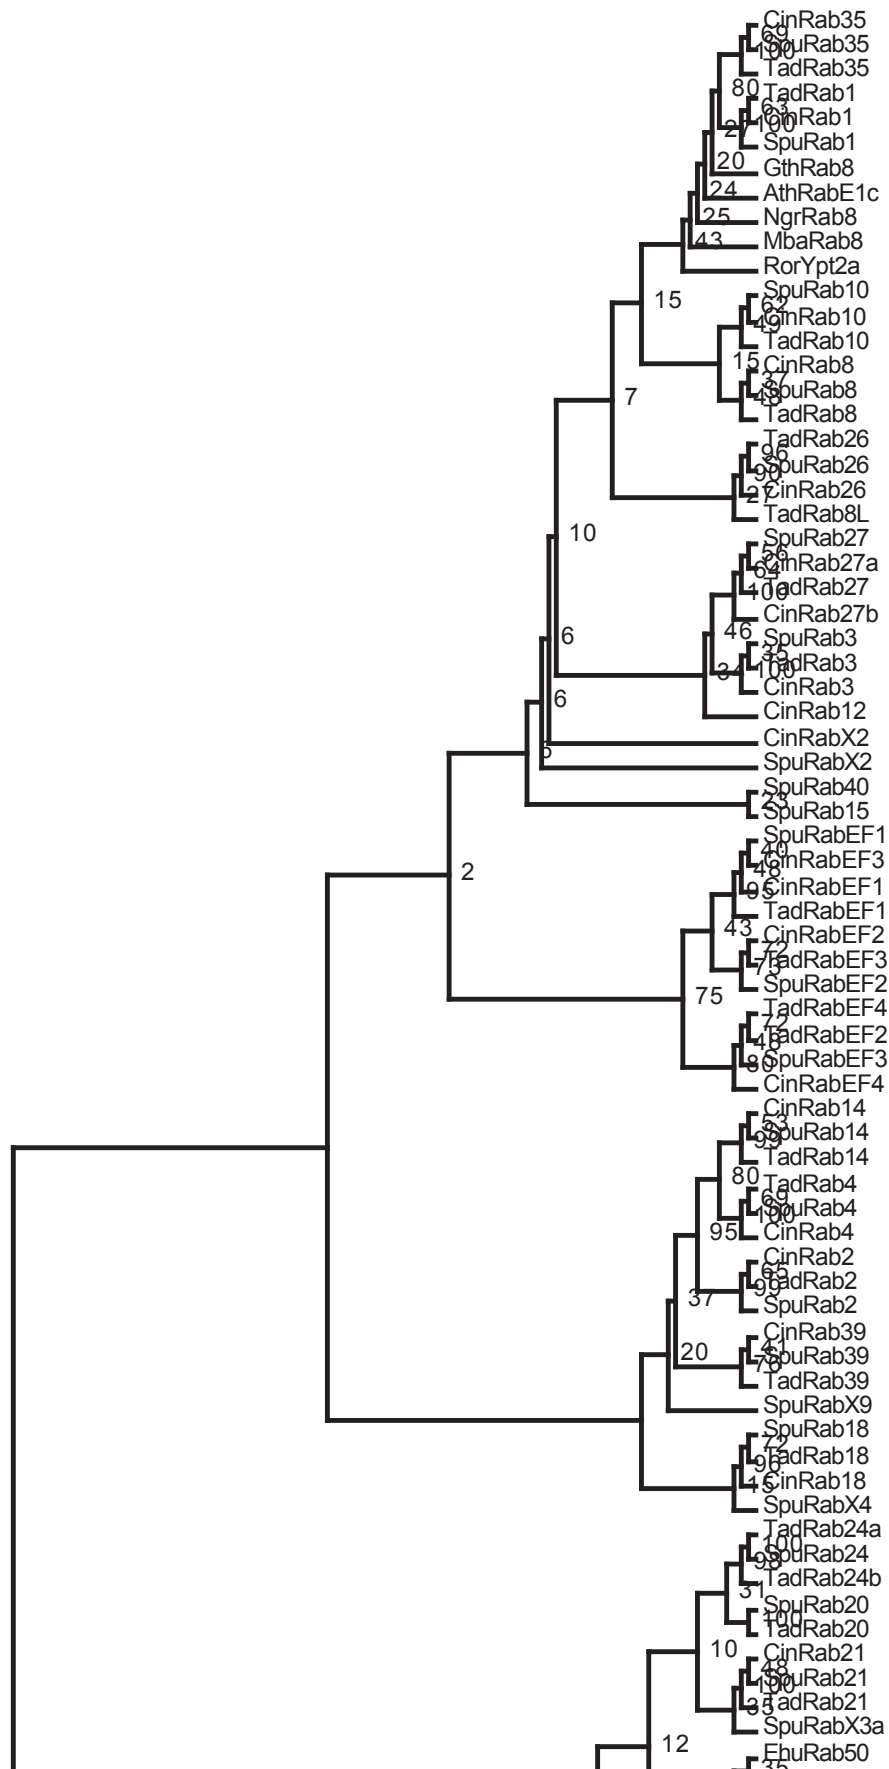

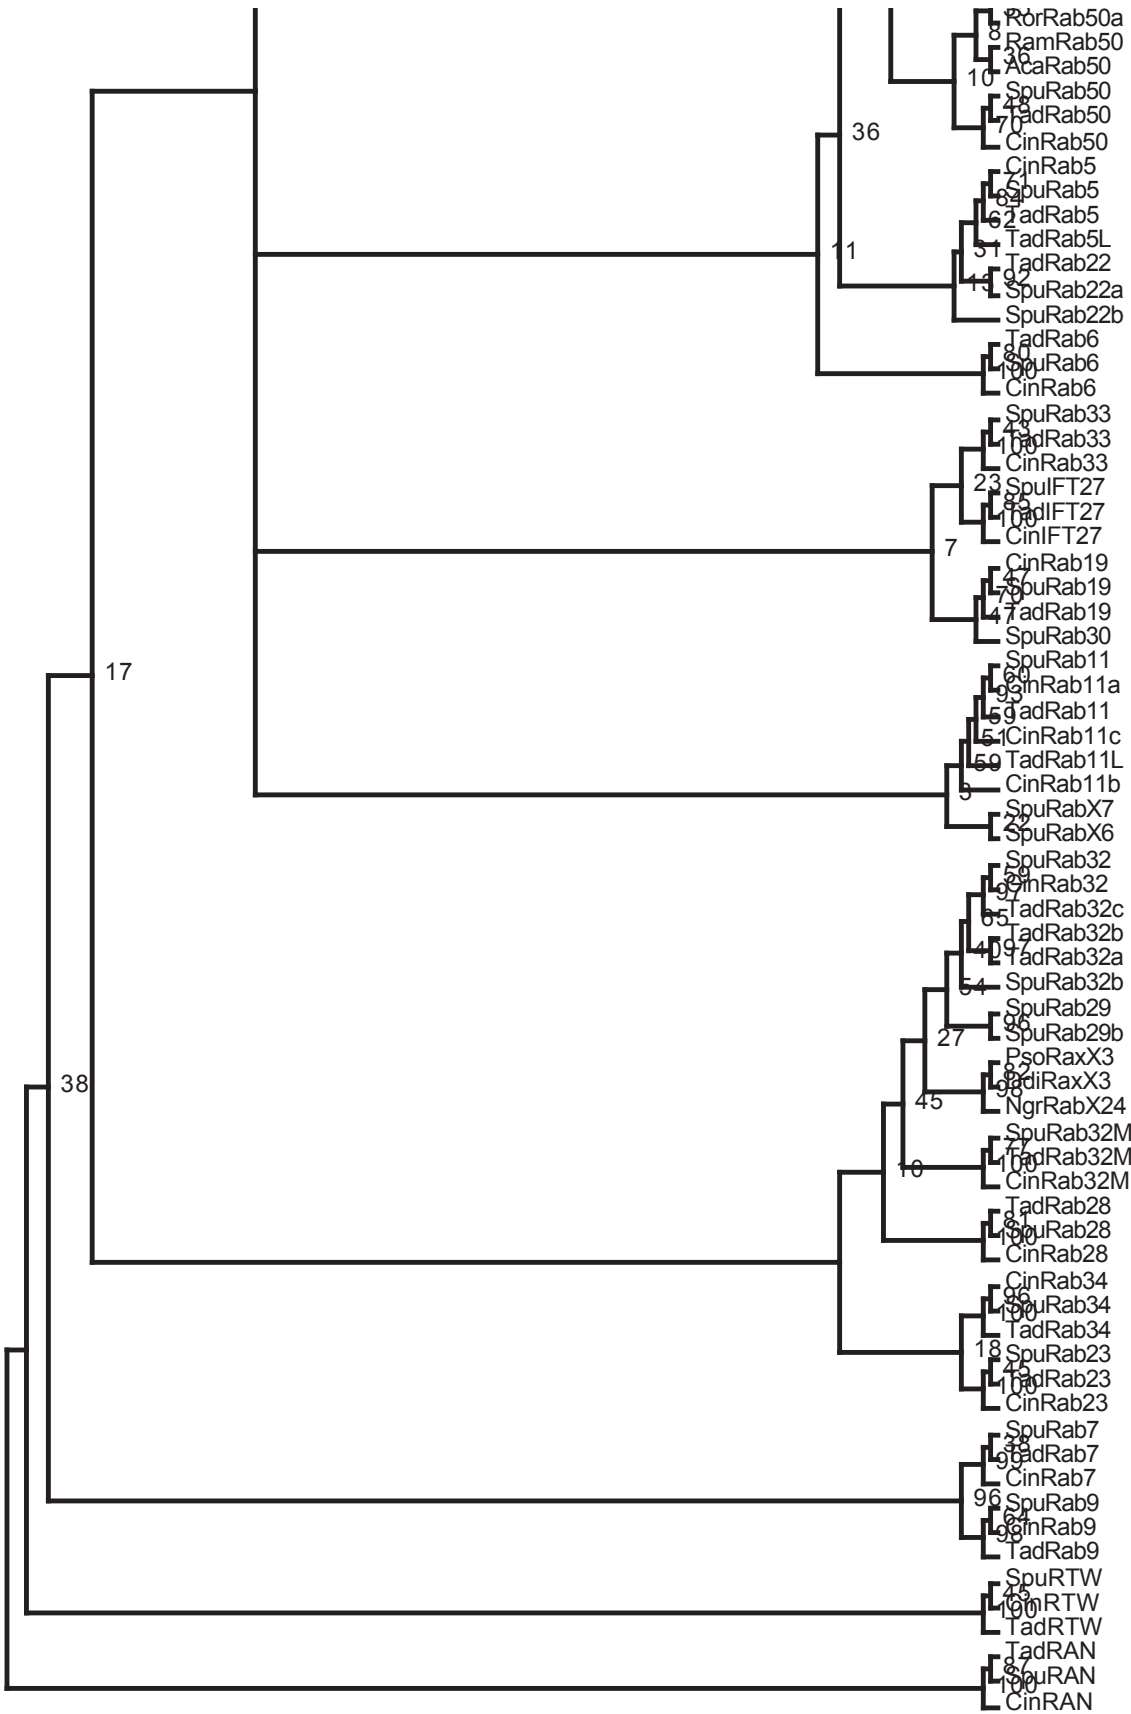

Supplement: supp_125.10.2500_JCS101378FigS15.pdf [file supp_125.10.2500_JCS101378FigS15.pdf]

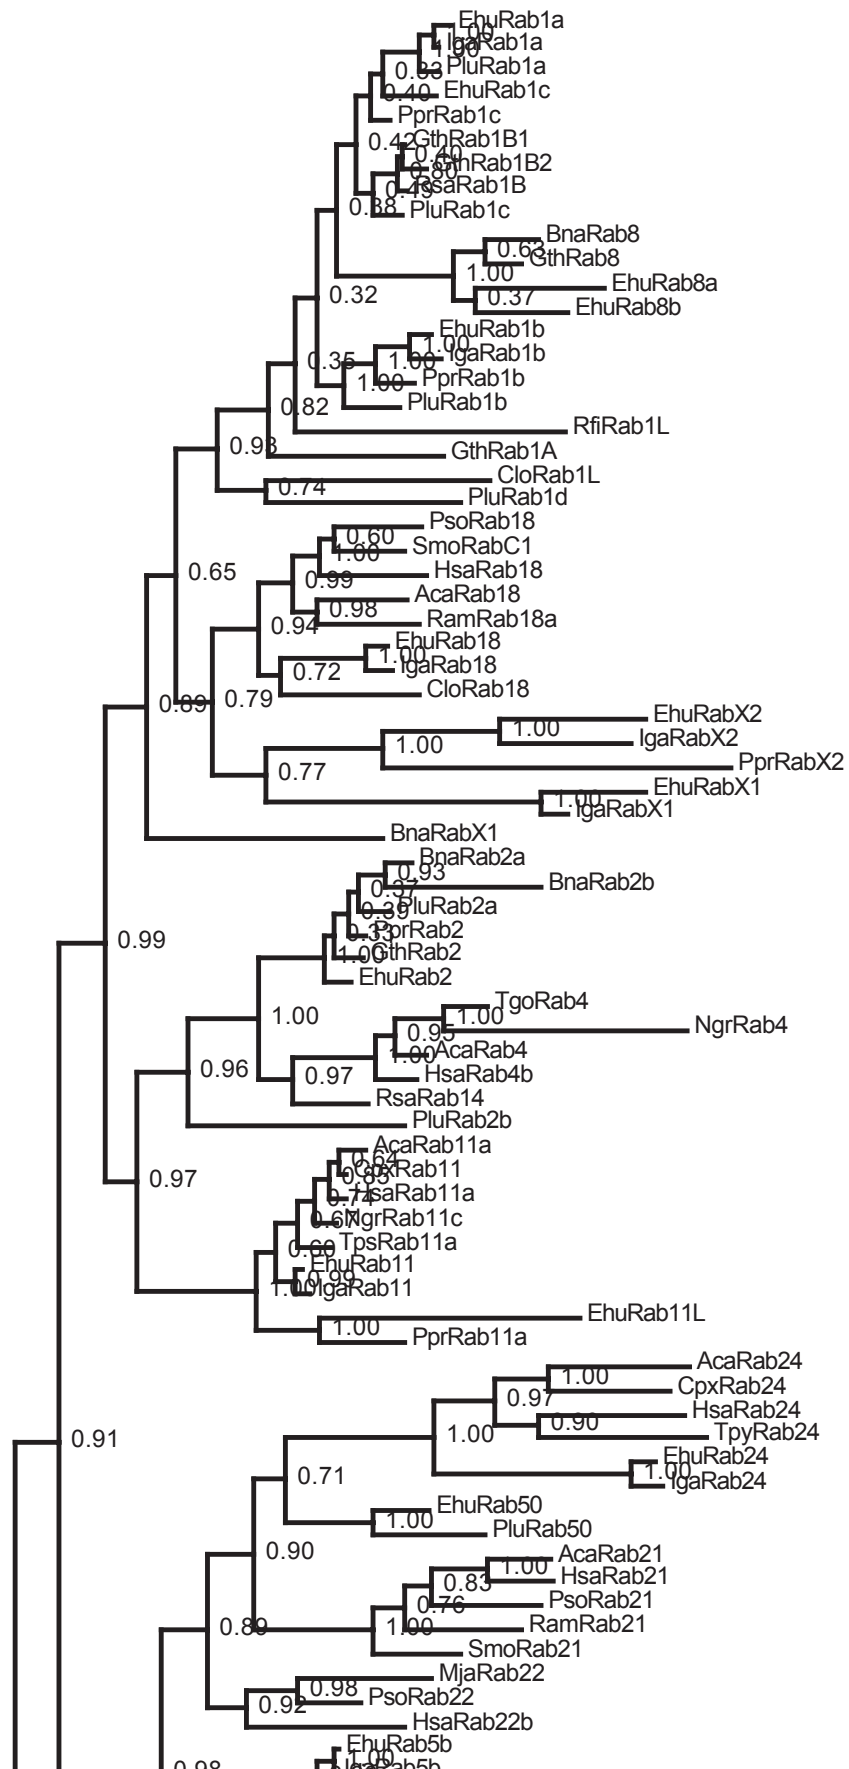

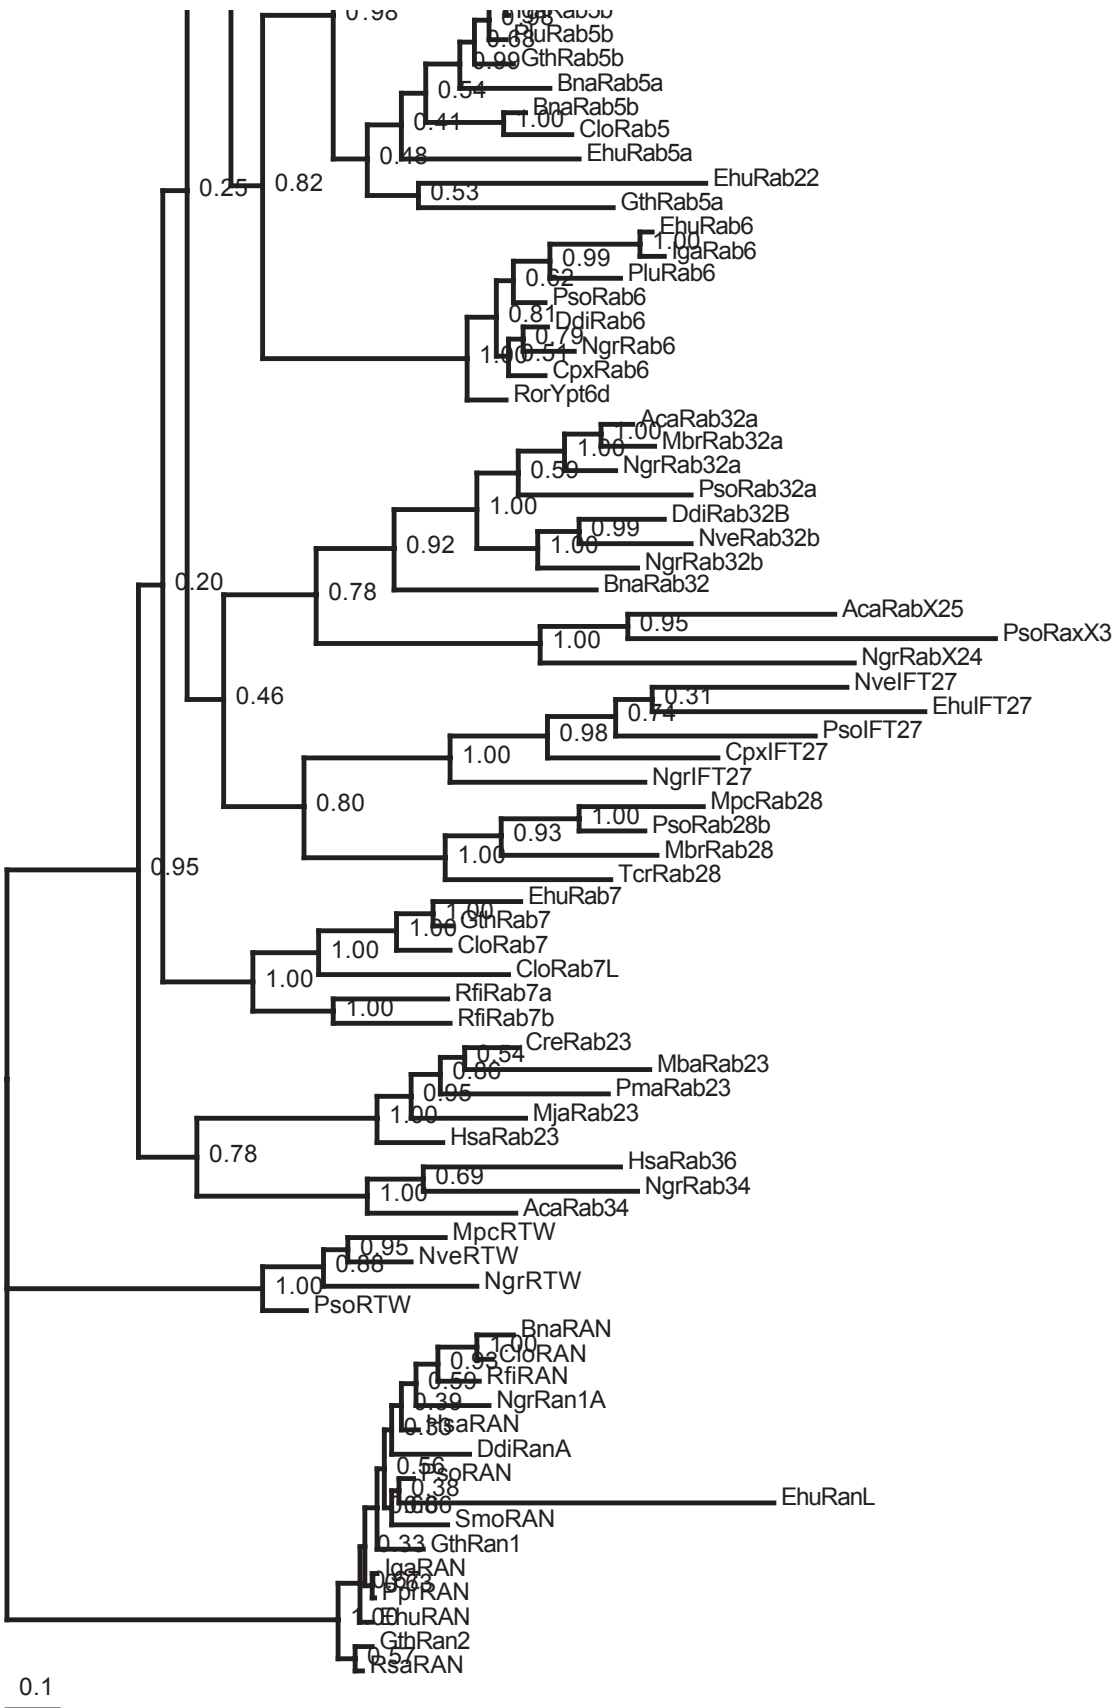

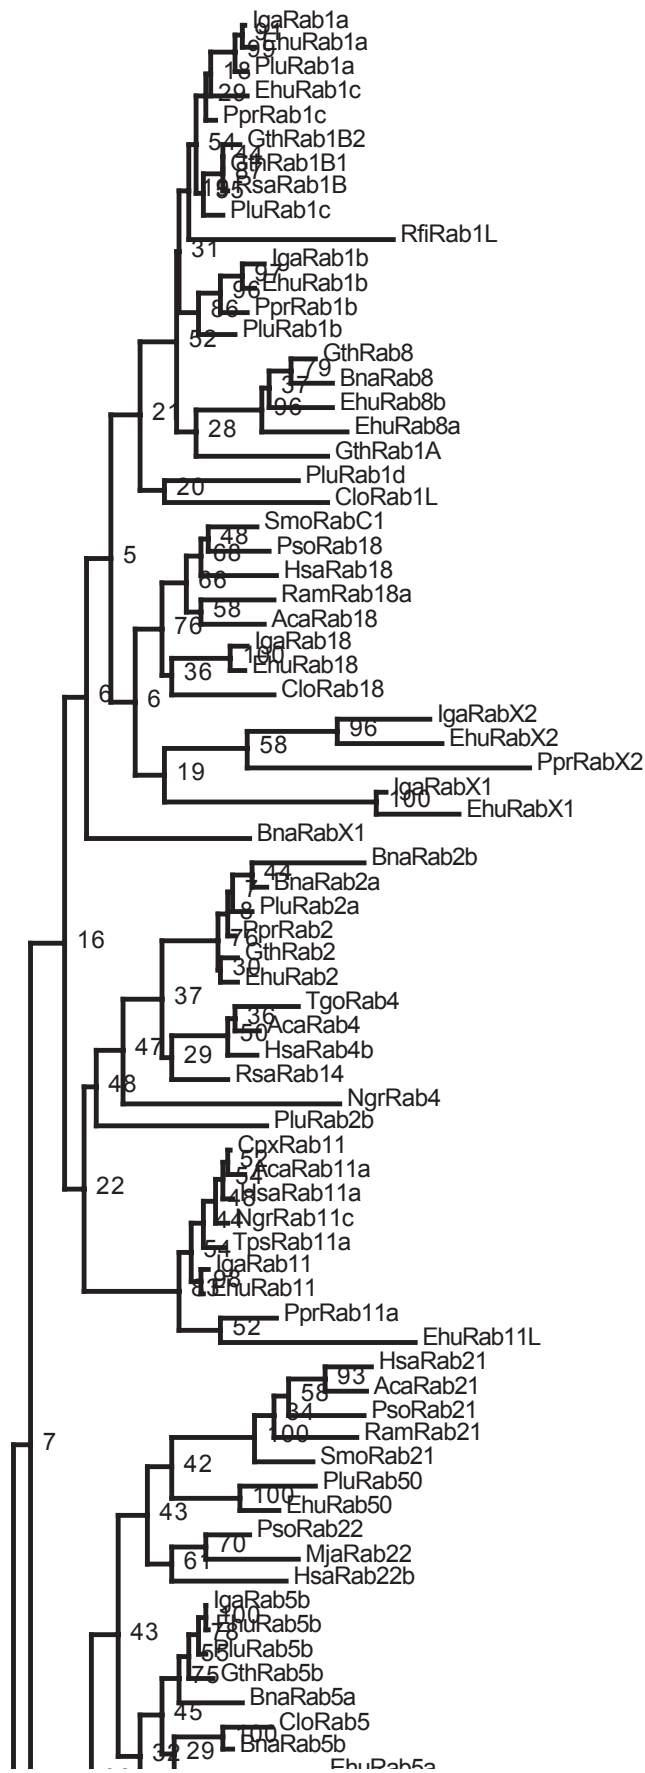

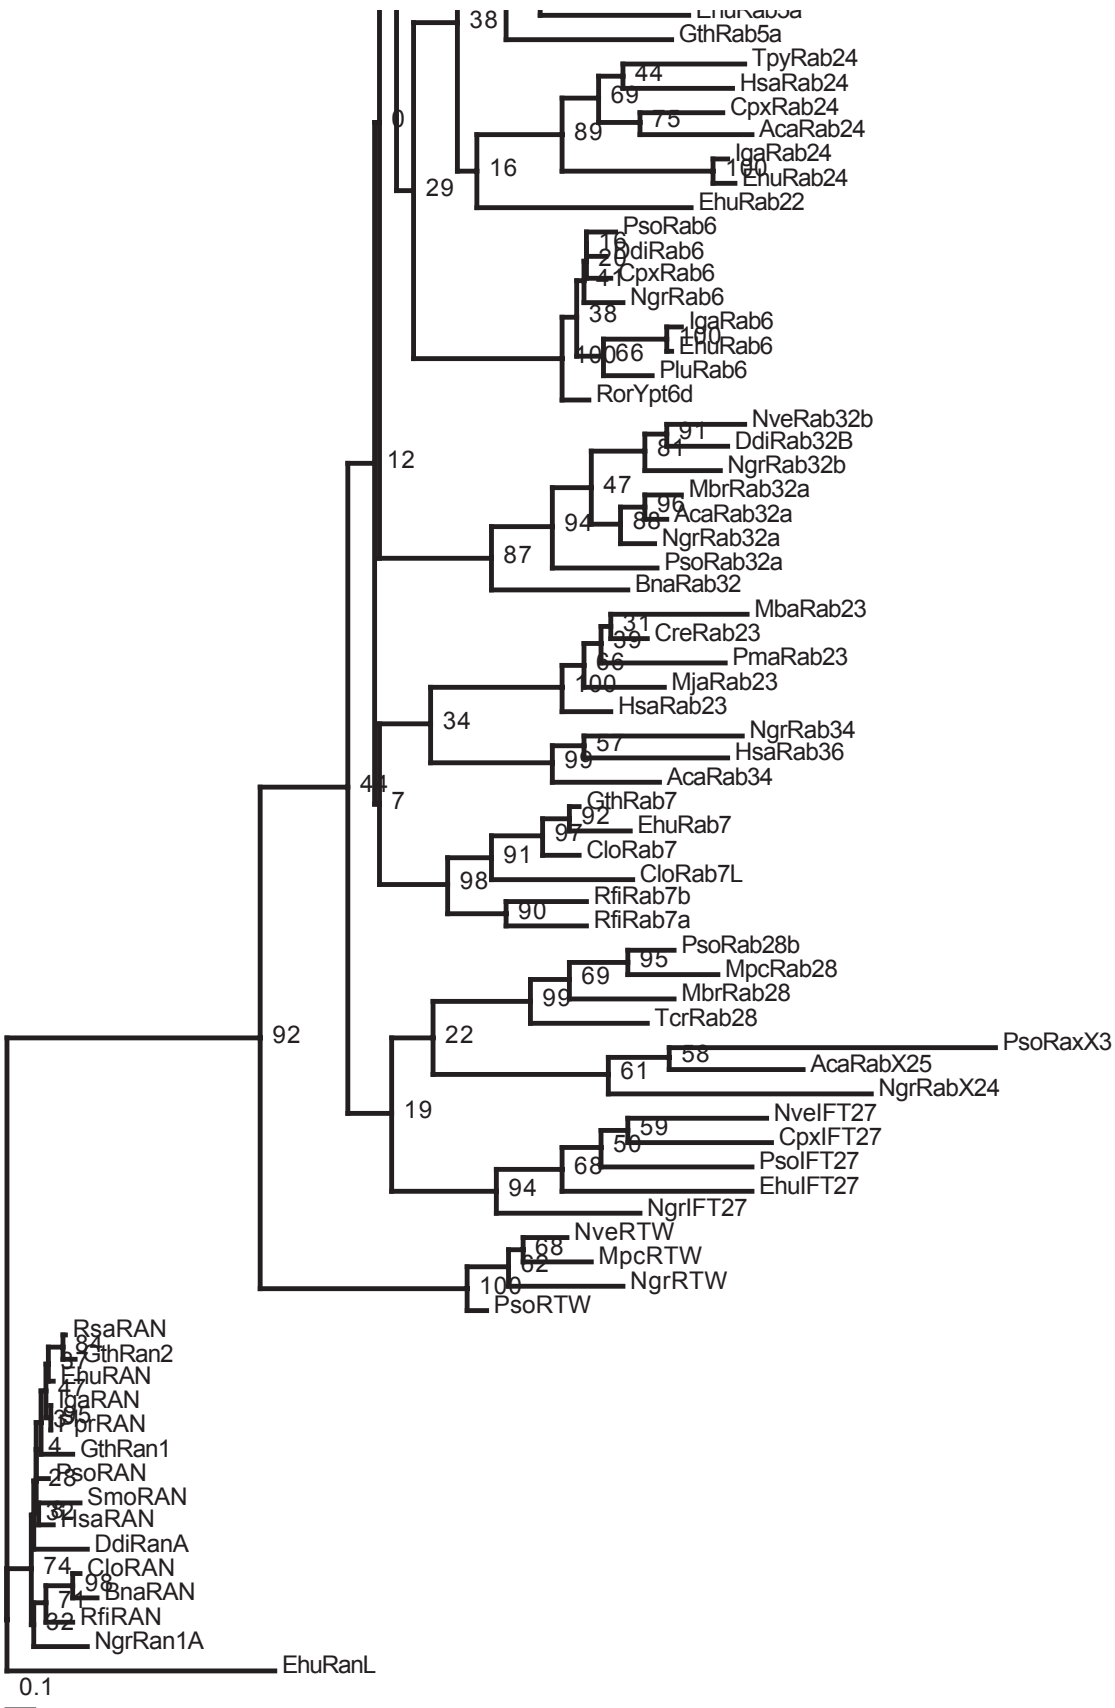

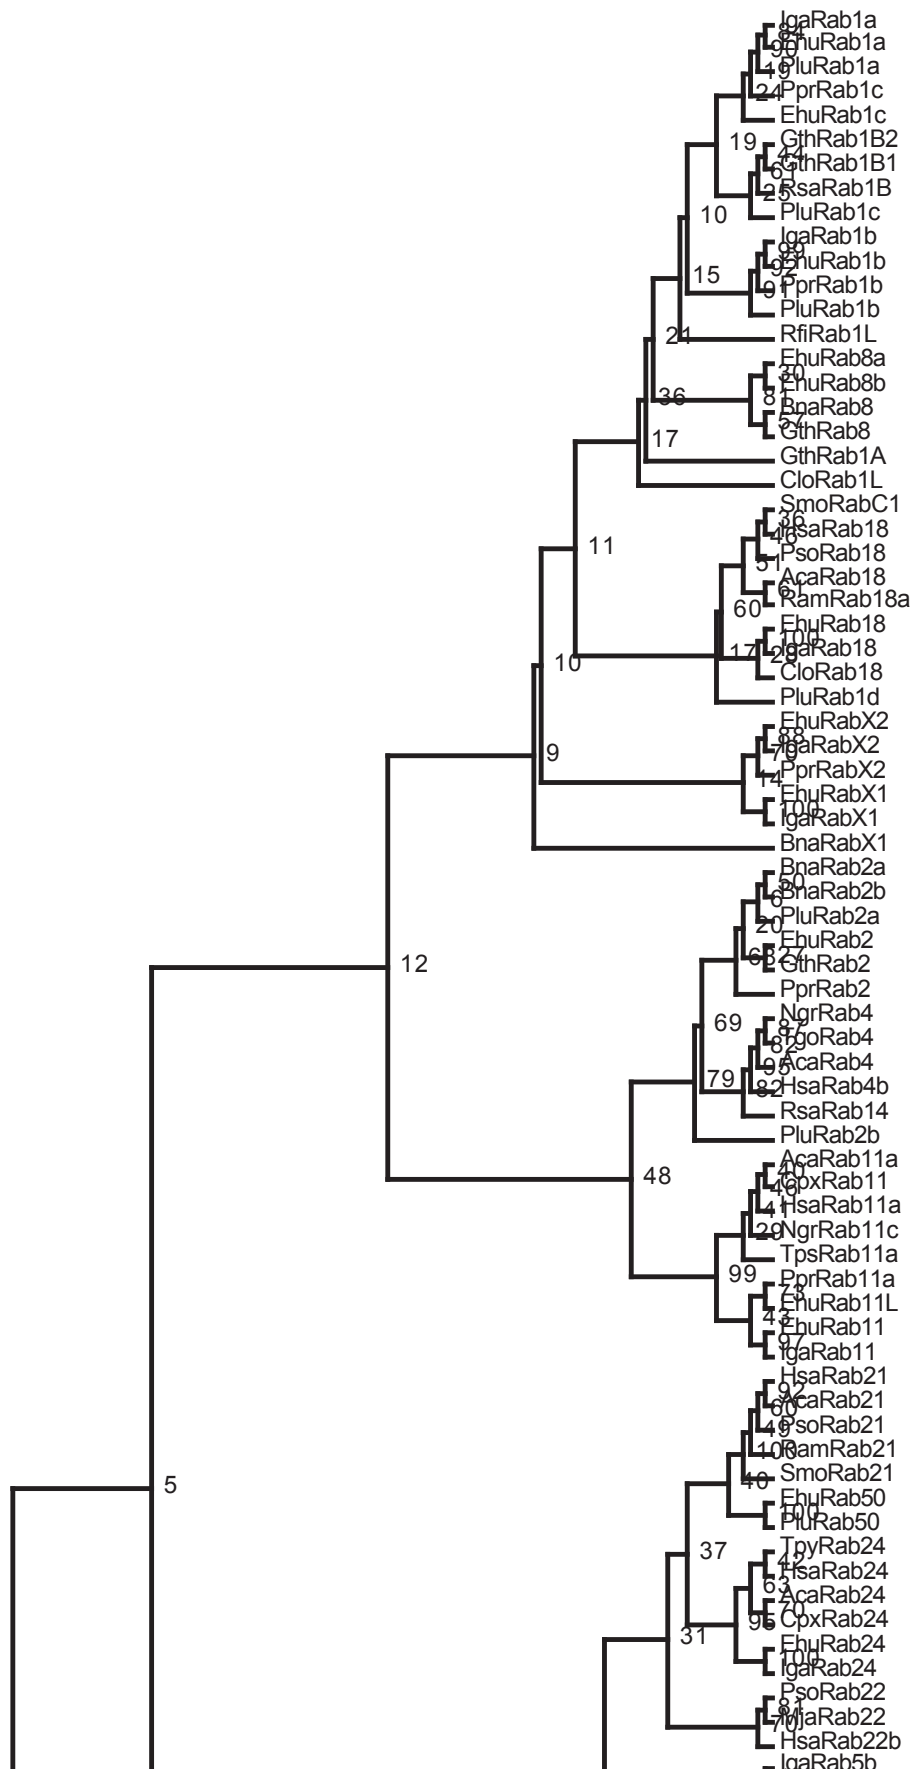

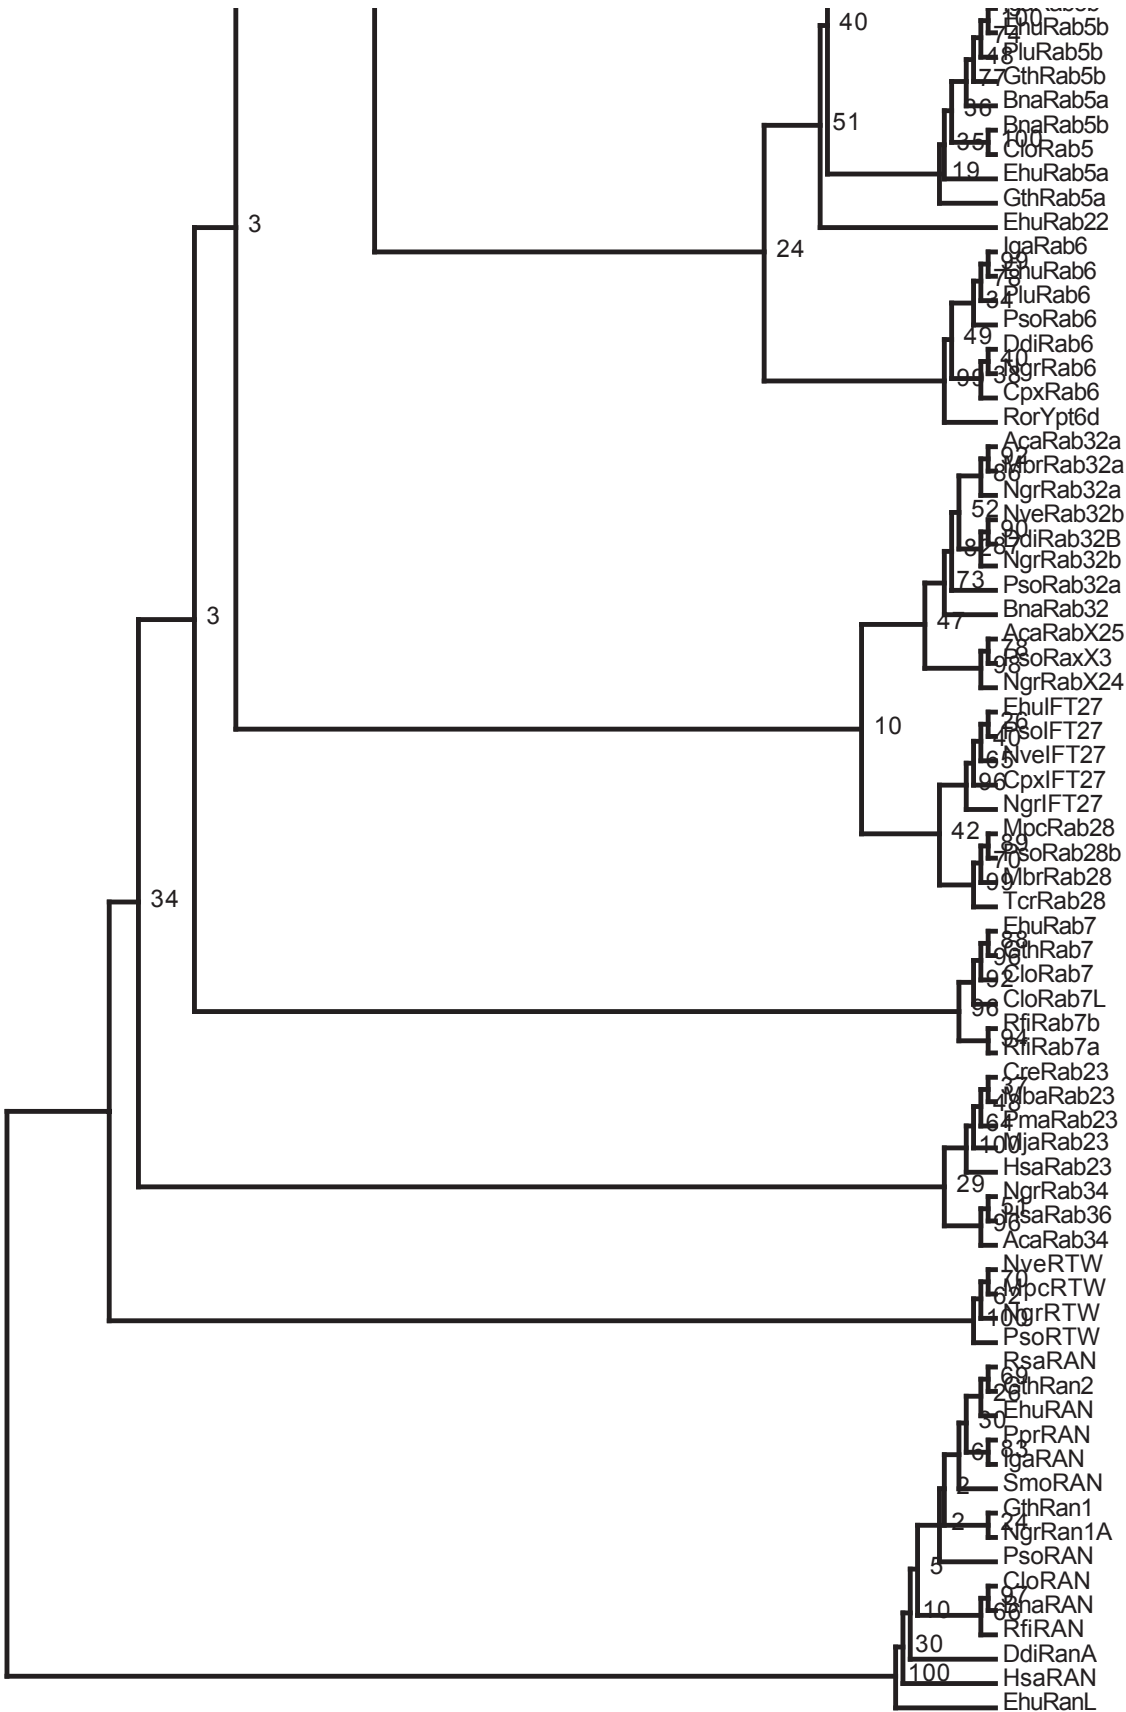

Supplement: supp_125.10.2500_JCS101378FigS16.pdf [file supp_125.10.2500_JCS101378FigS16.pdf]

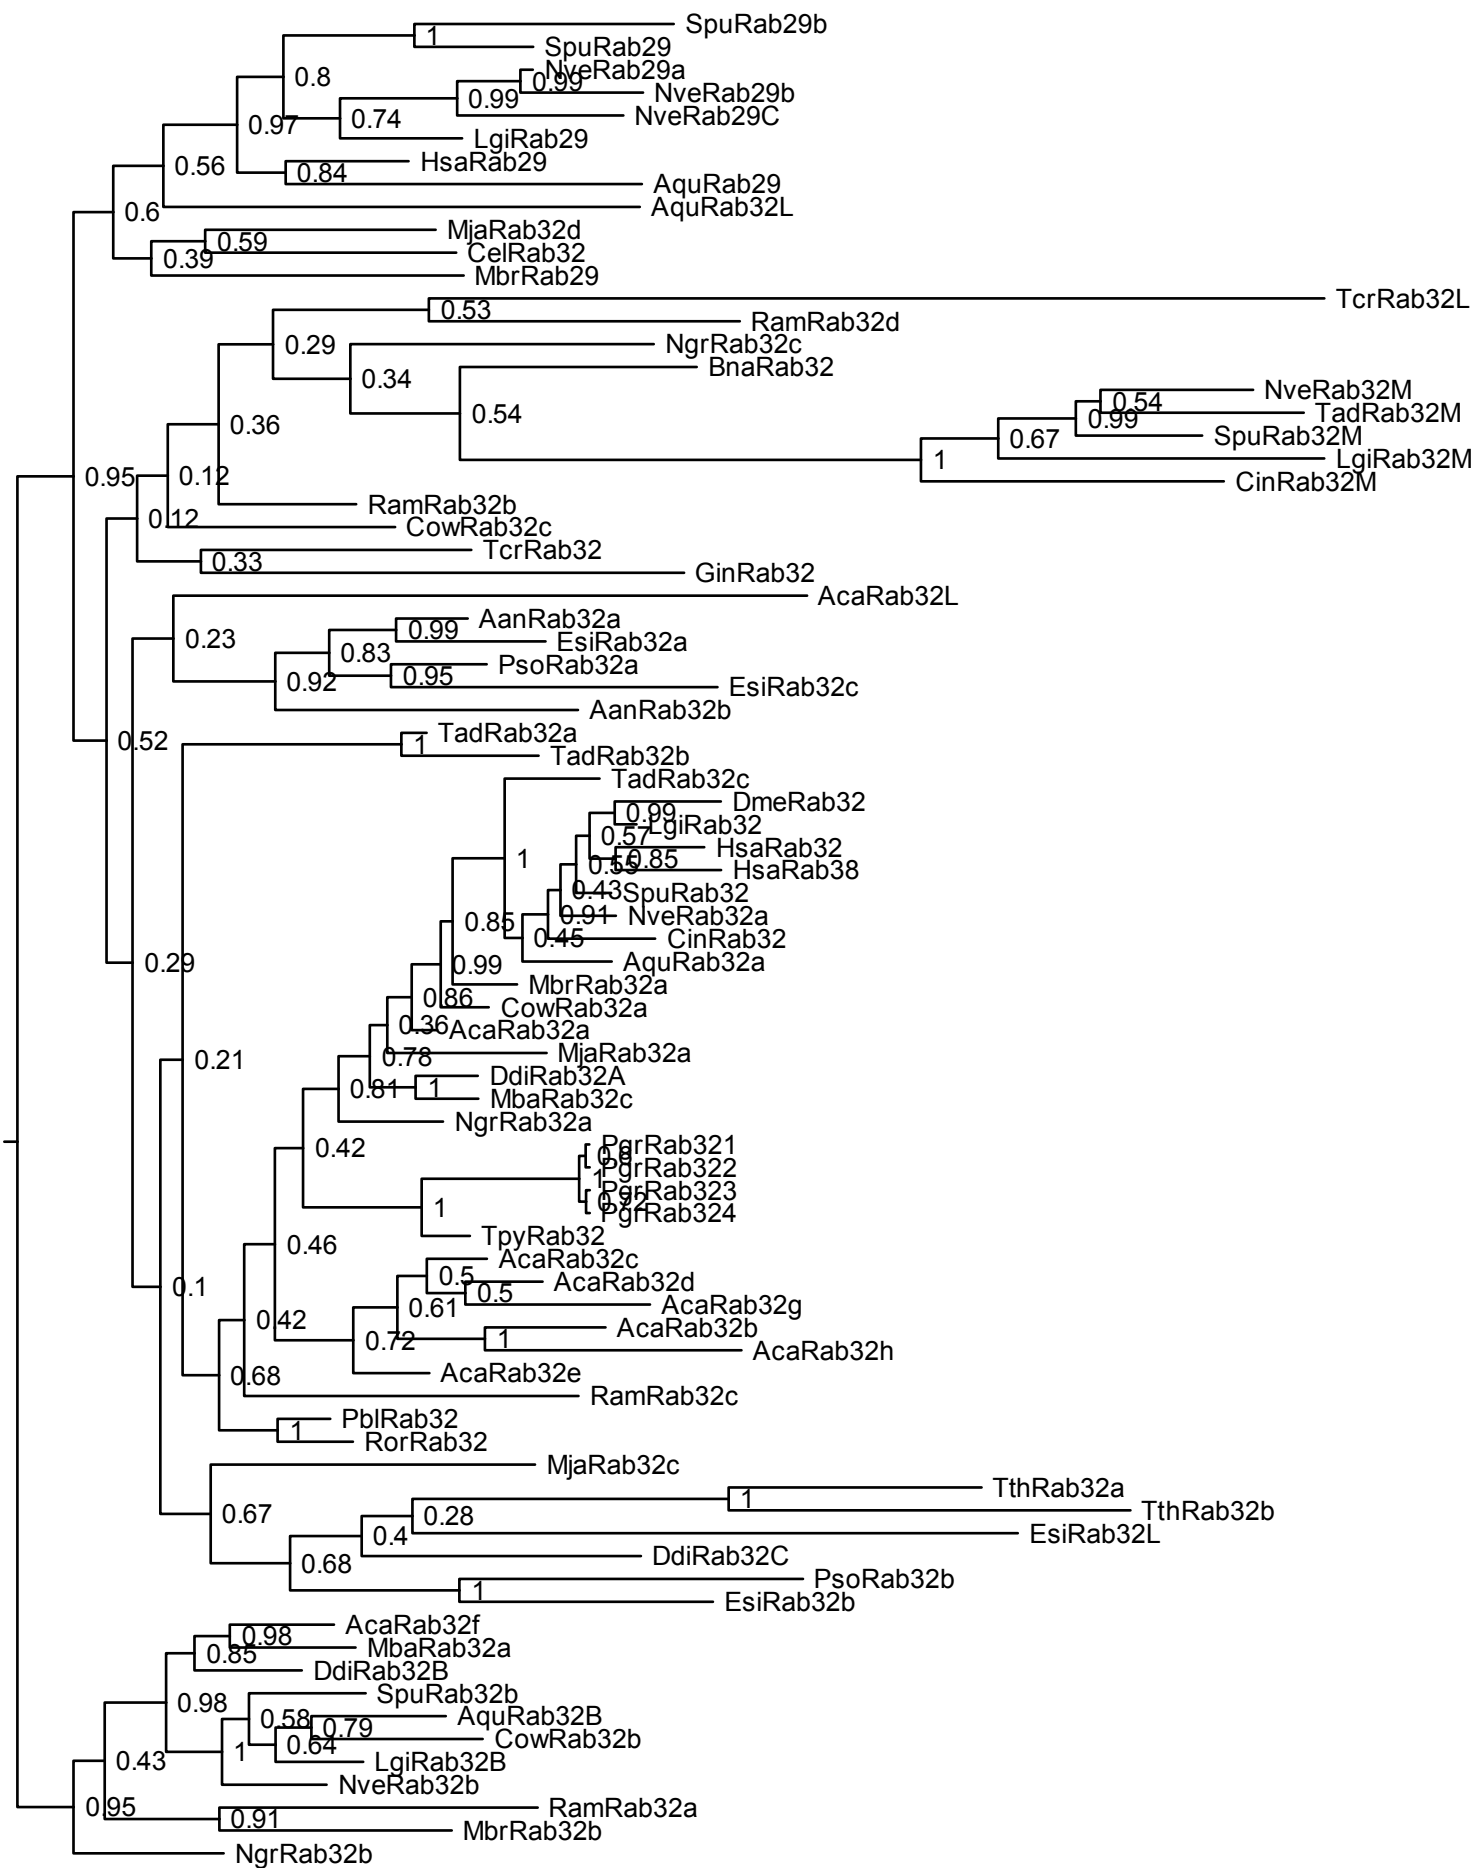

0.3

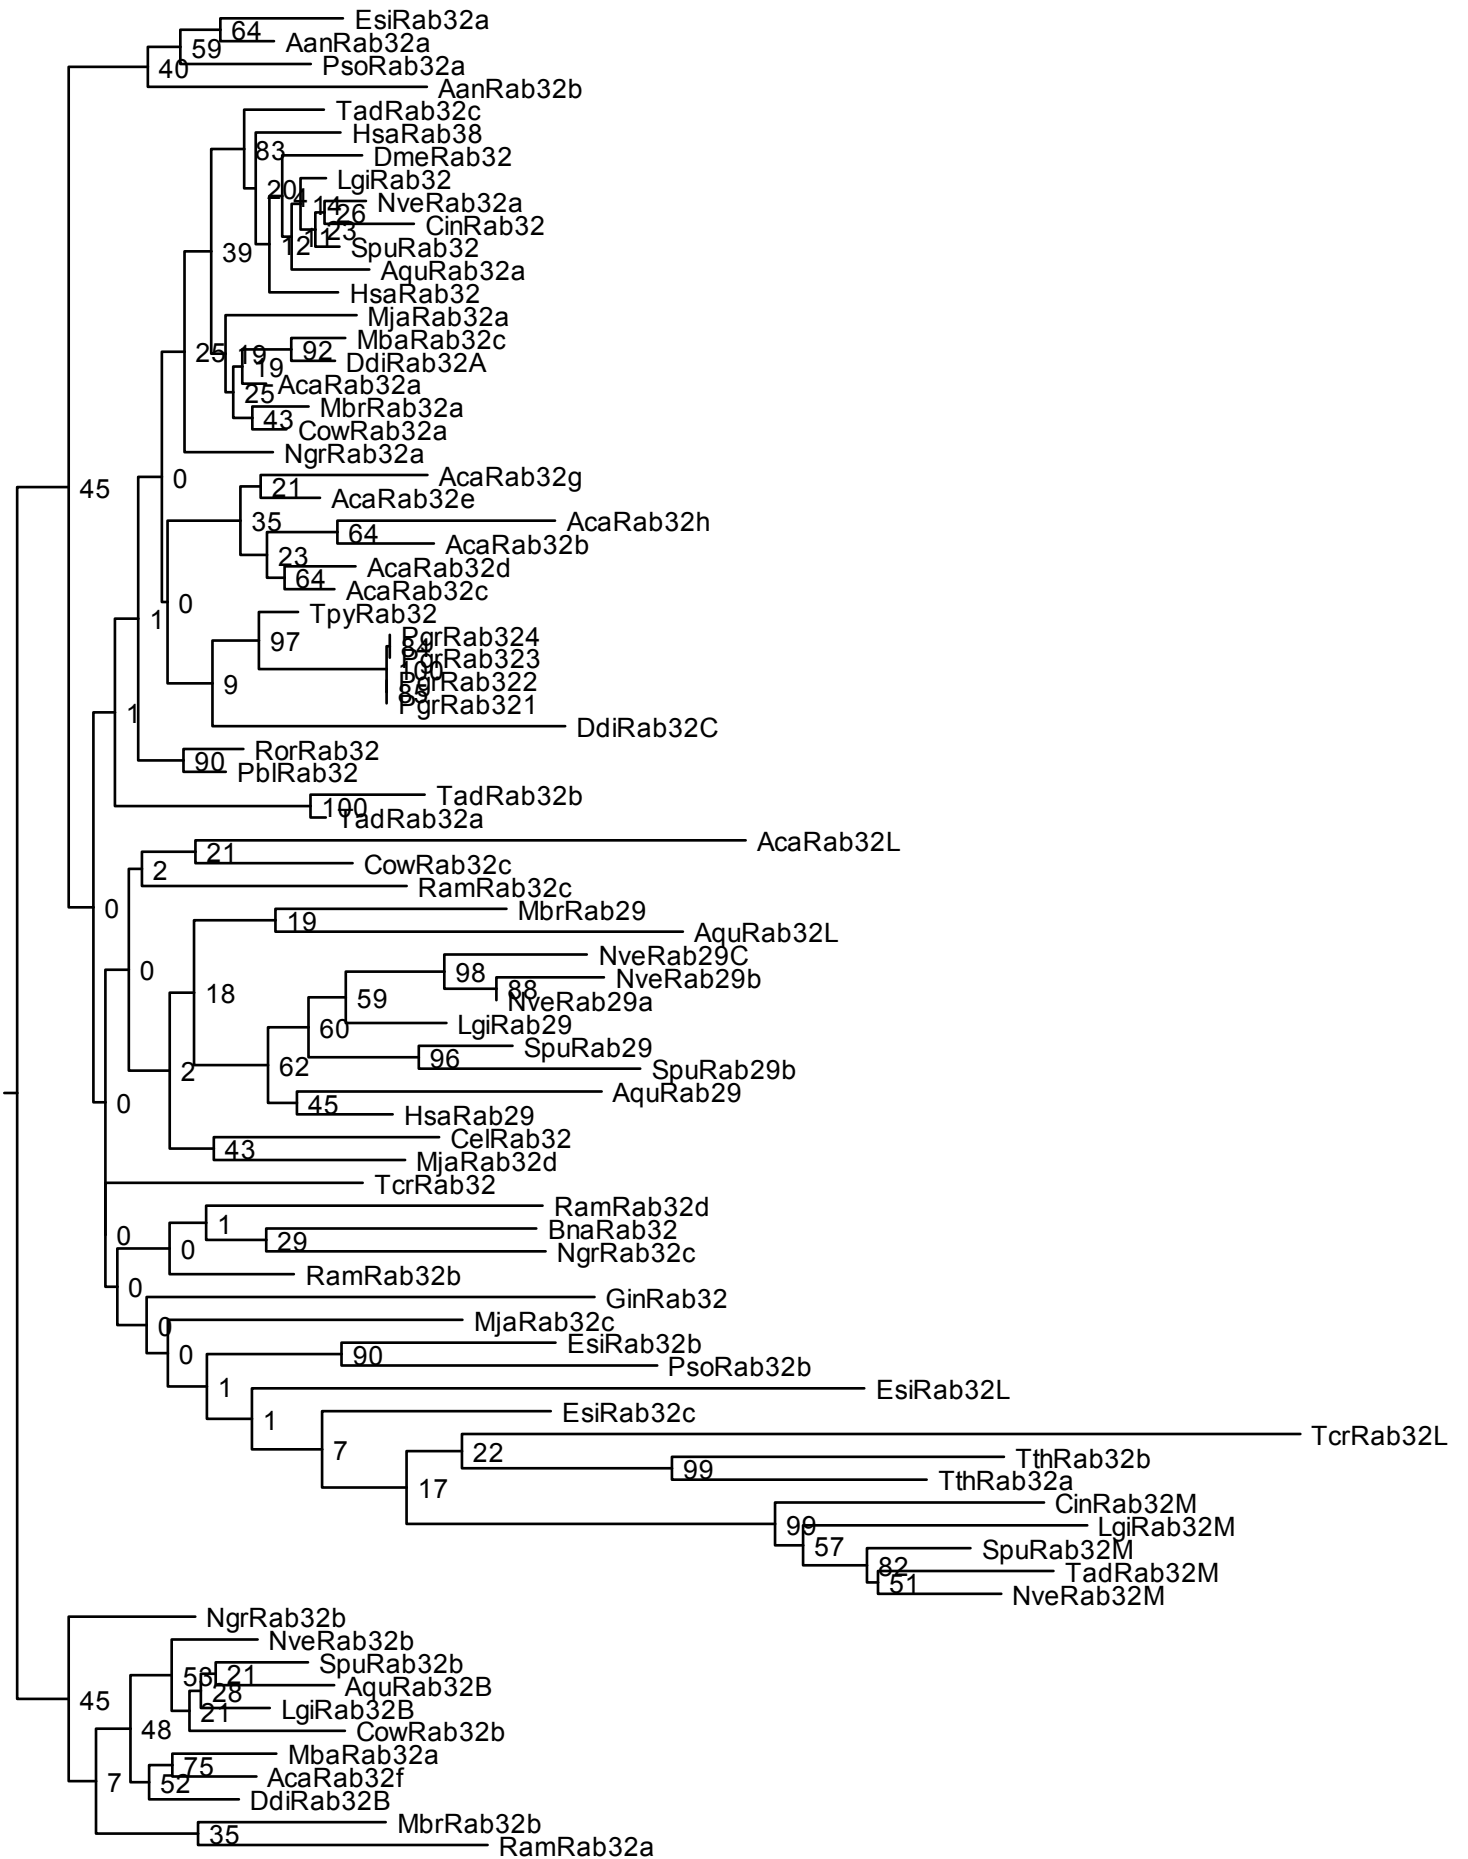

0.3

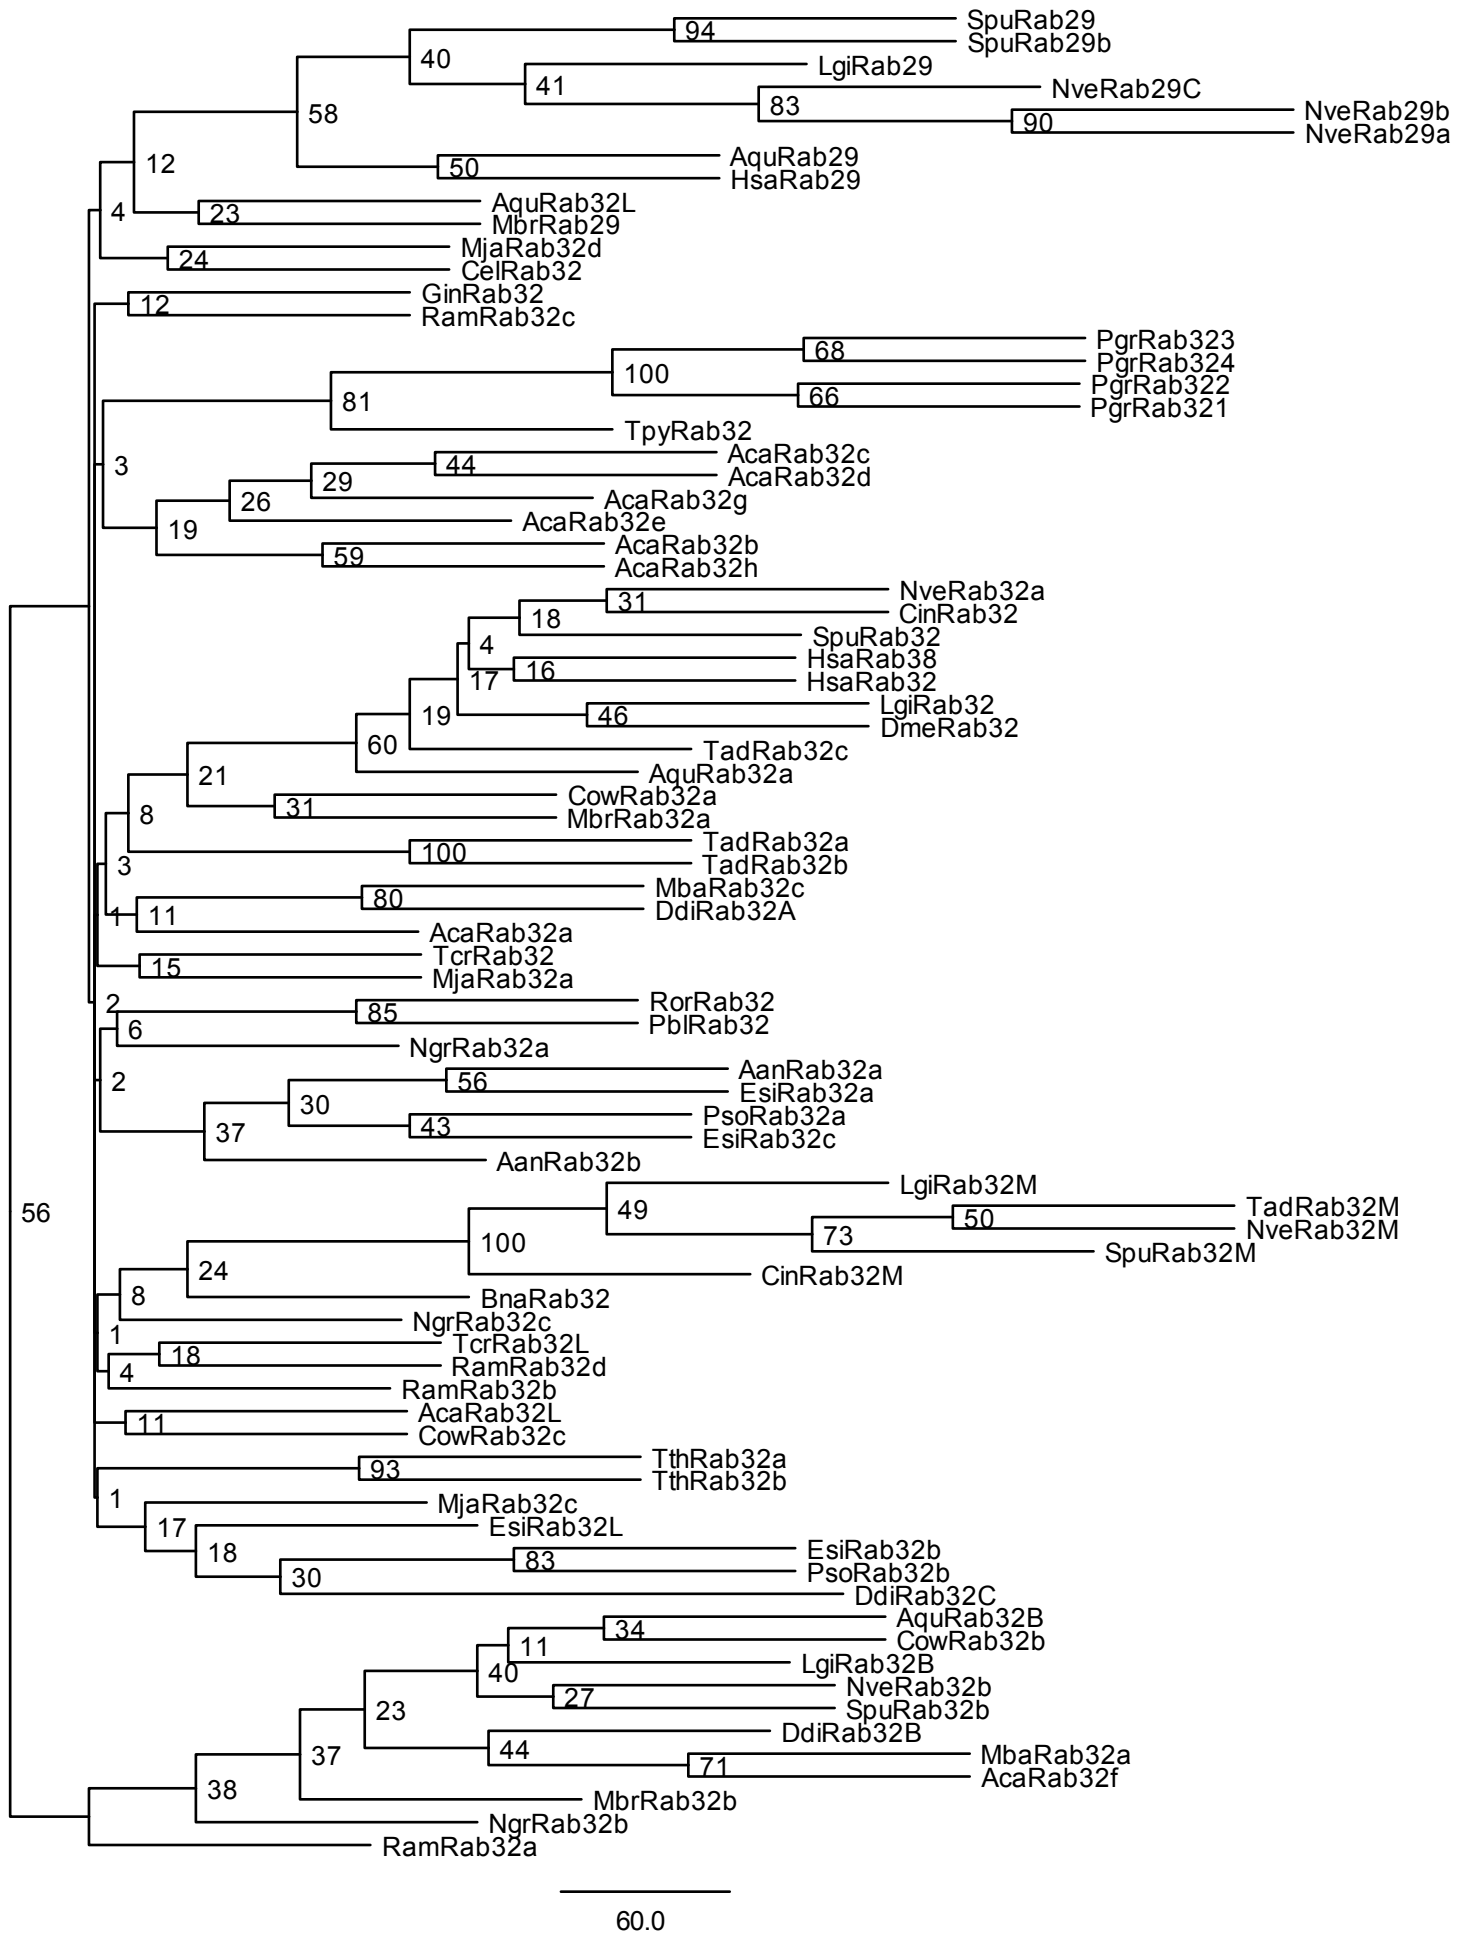

Supplement: supp_125.10.2500_JCS101378FigS19.pdf [file supp_125.10.2500_JCS101378FigS19.pdf]

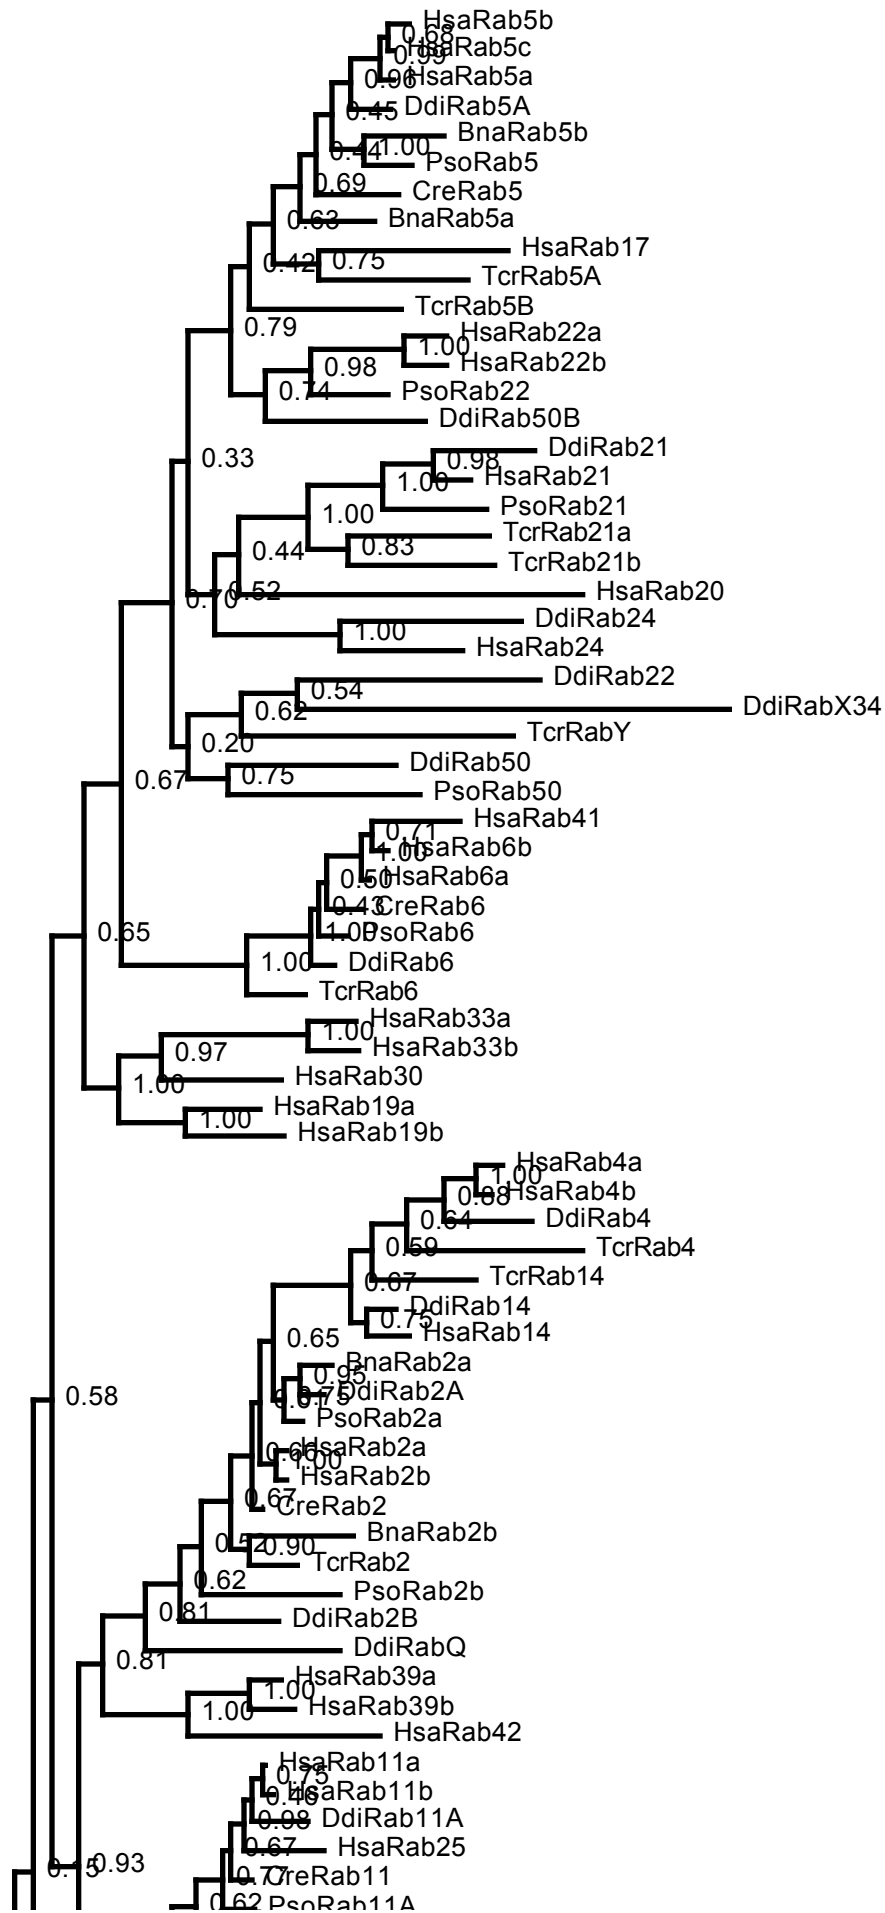

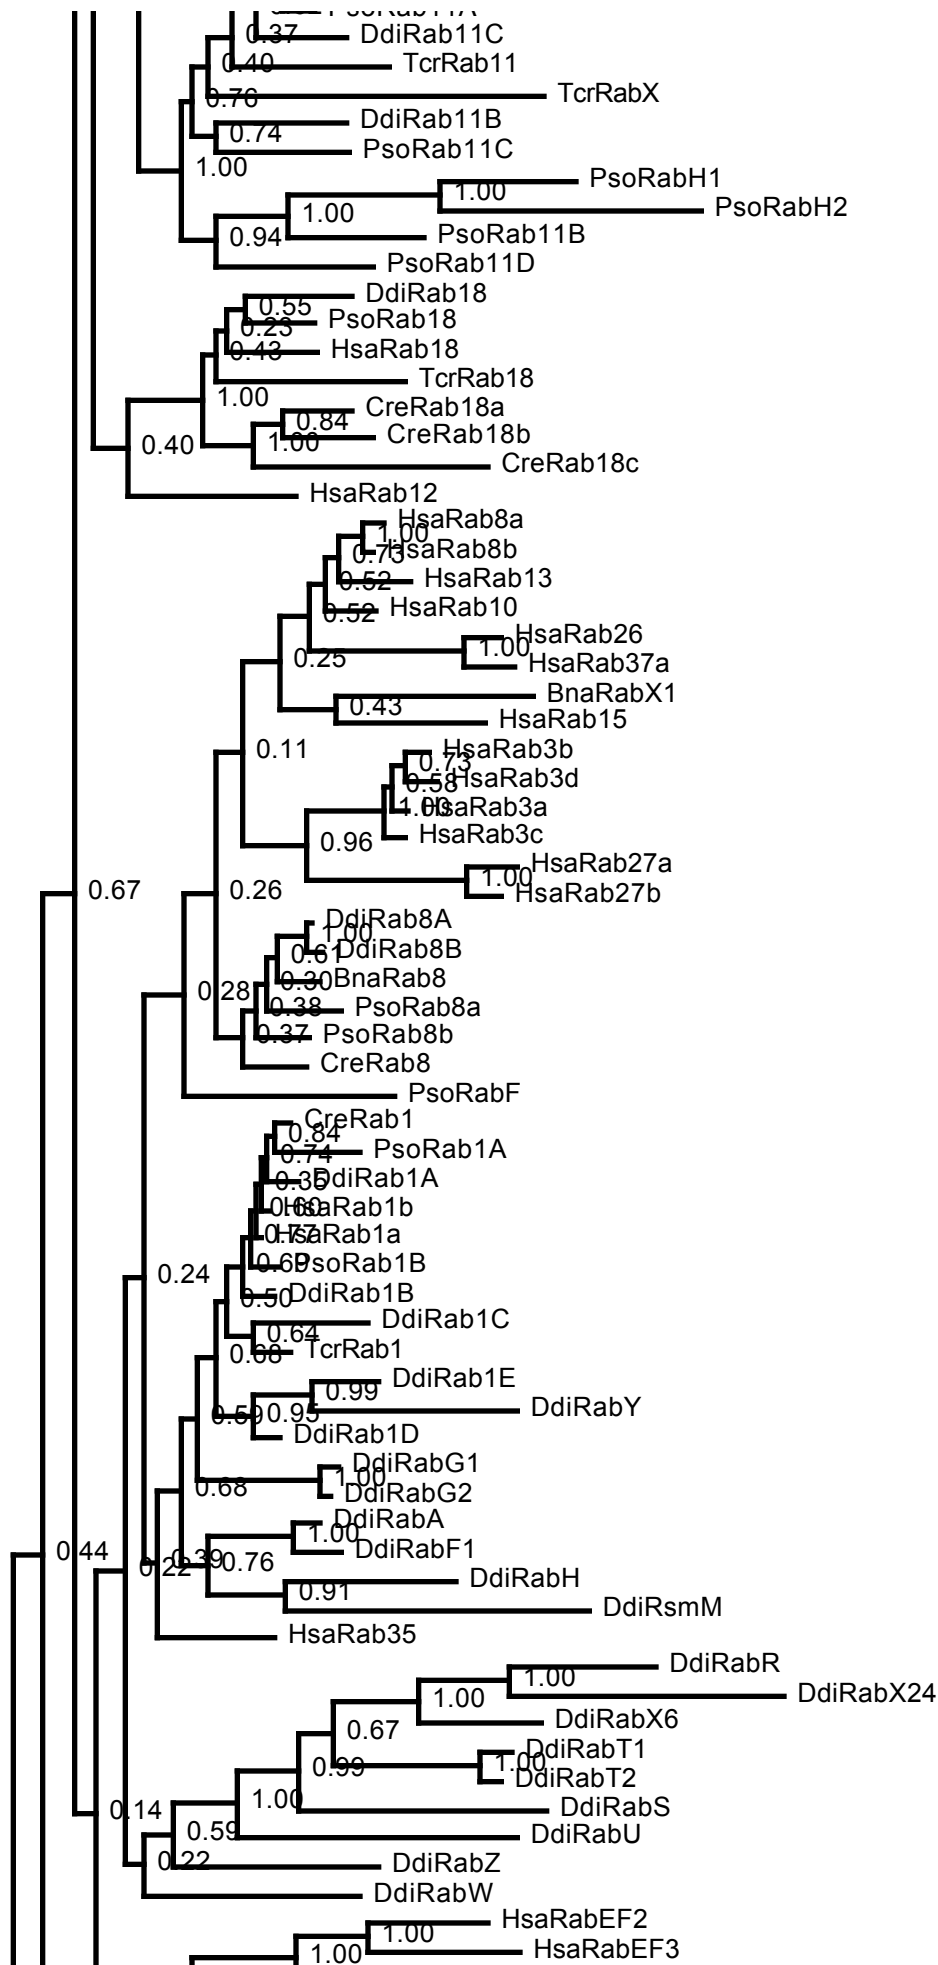

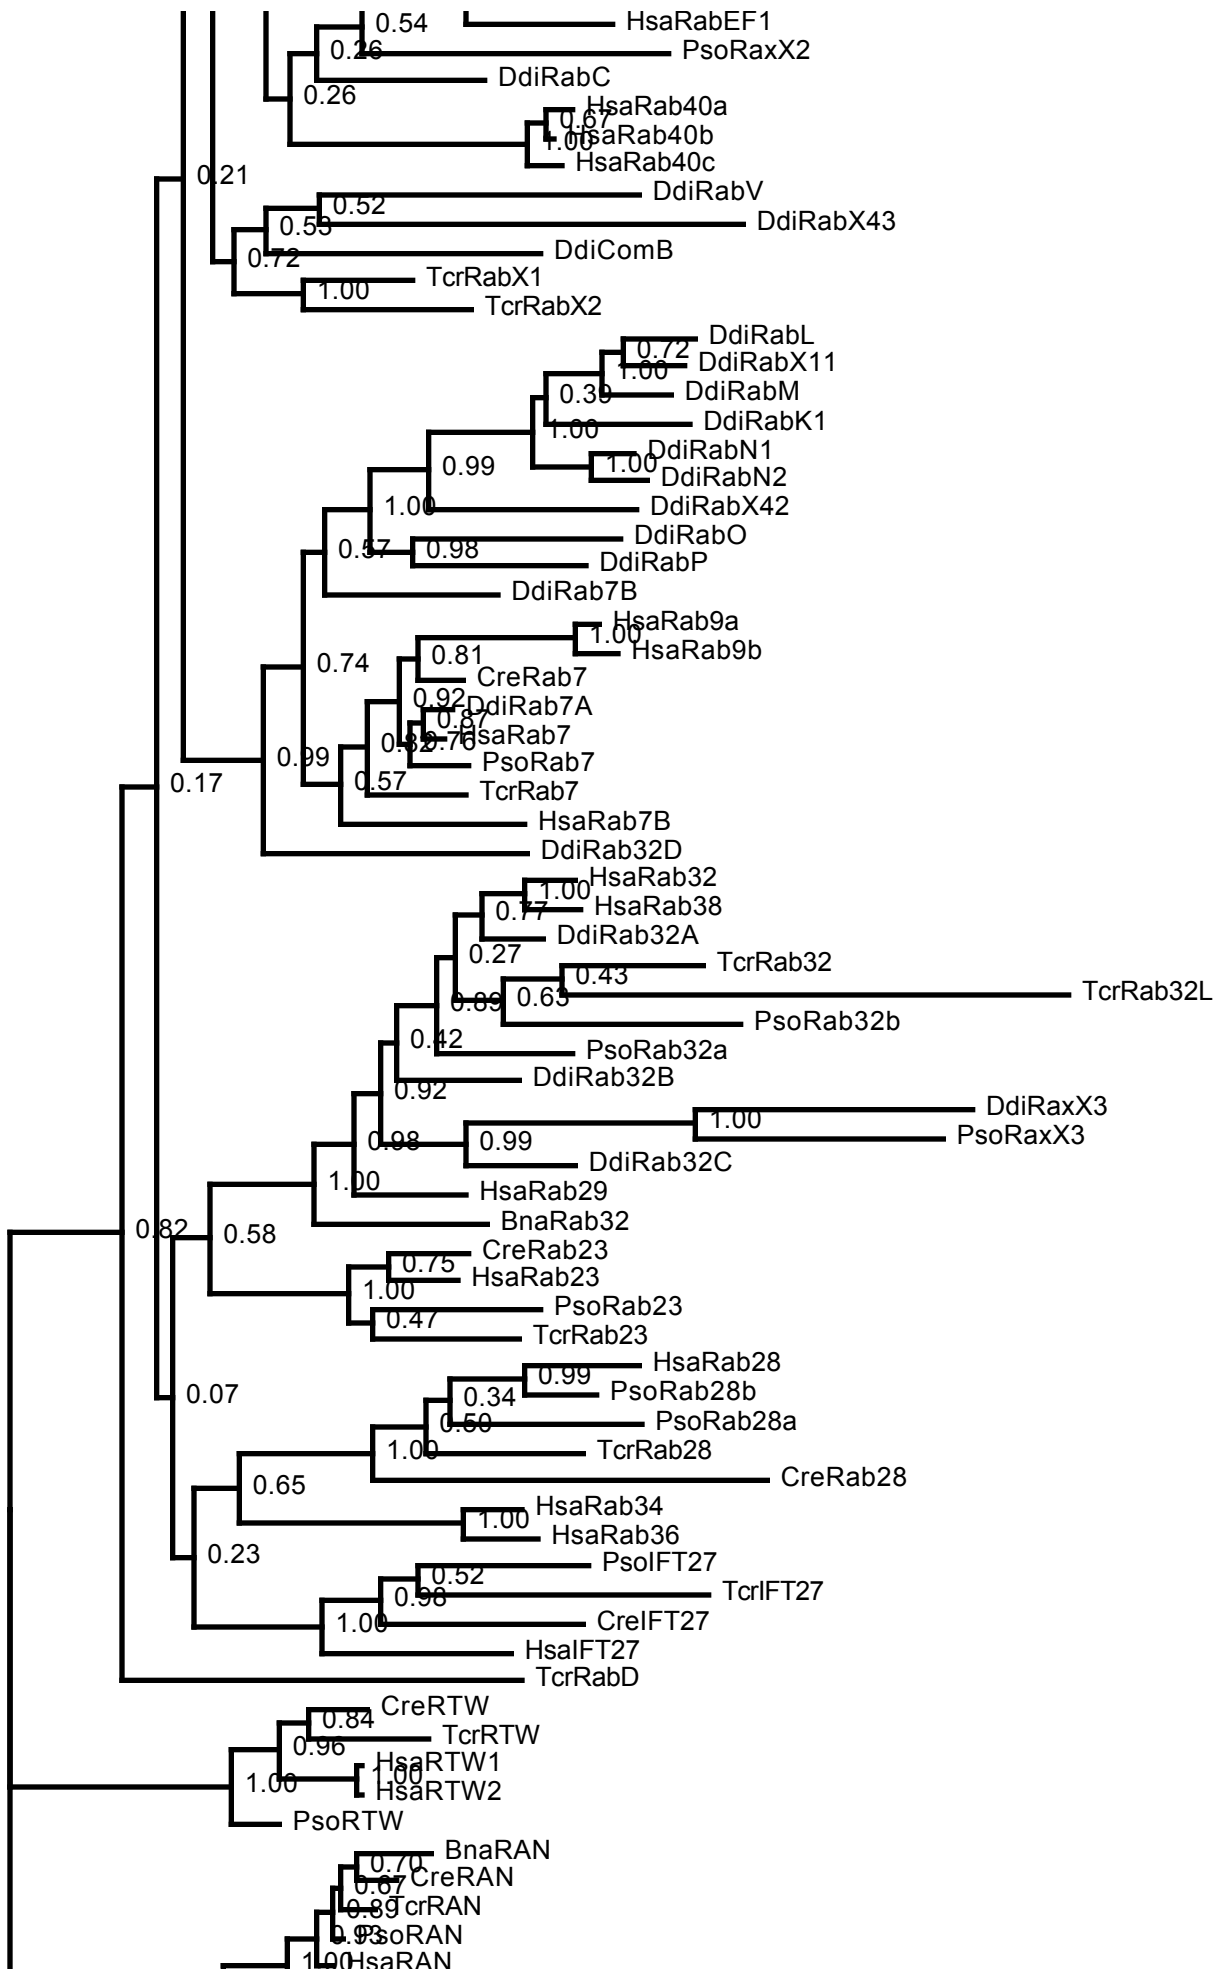

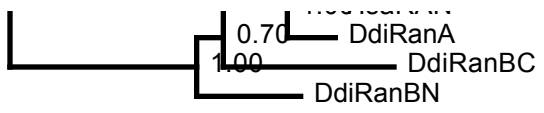

0.1

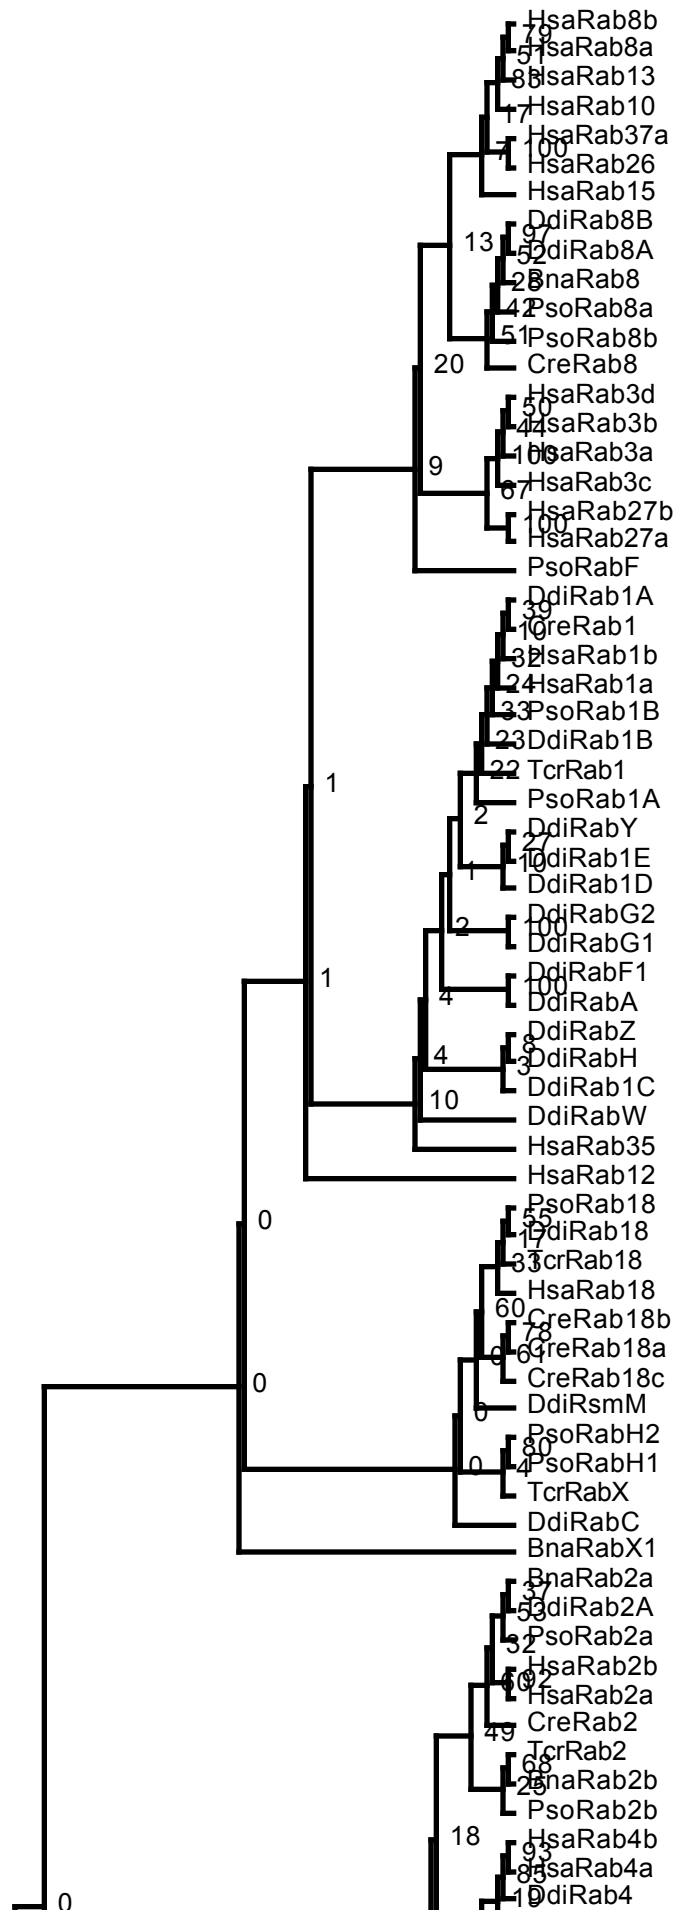

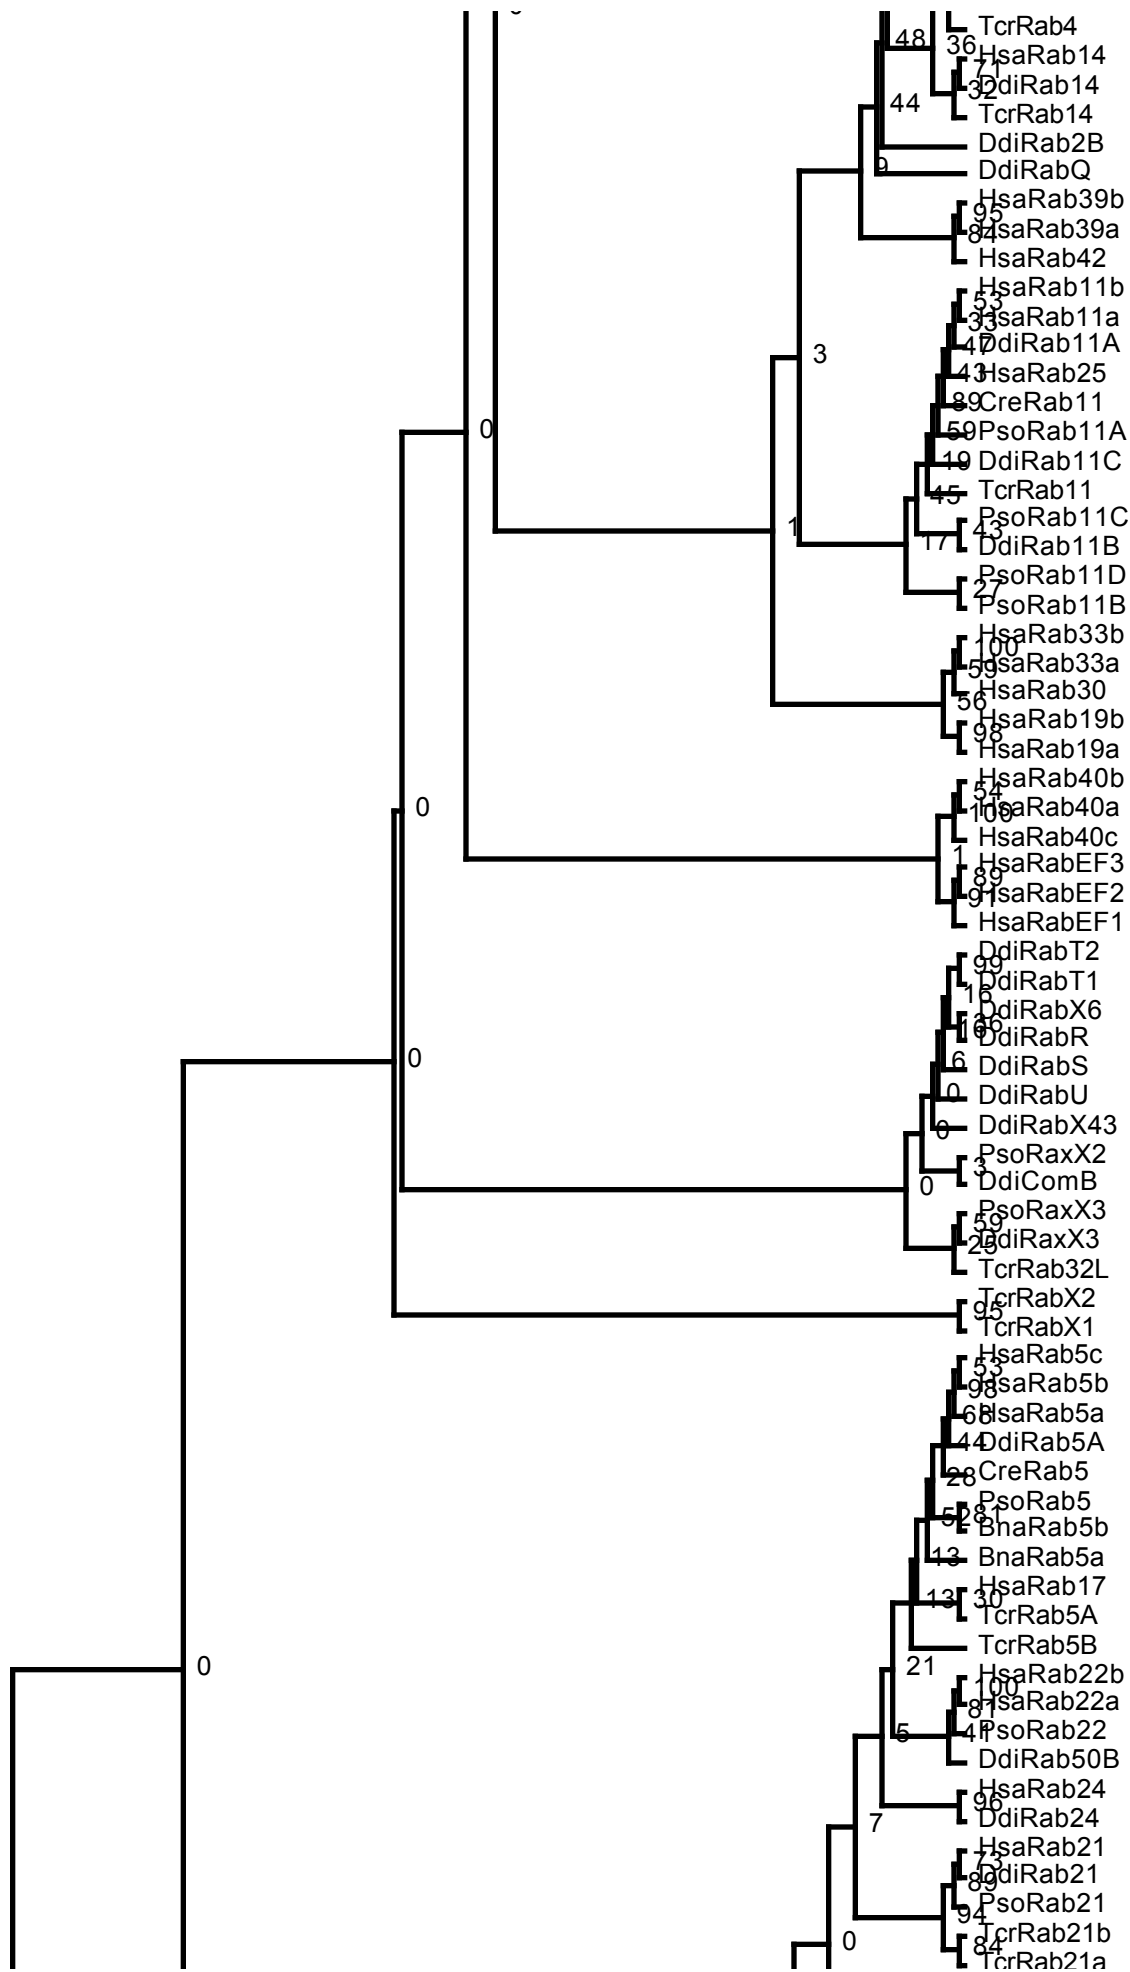

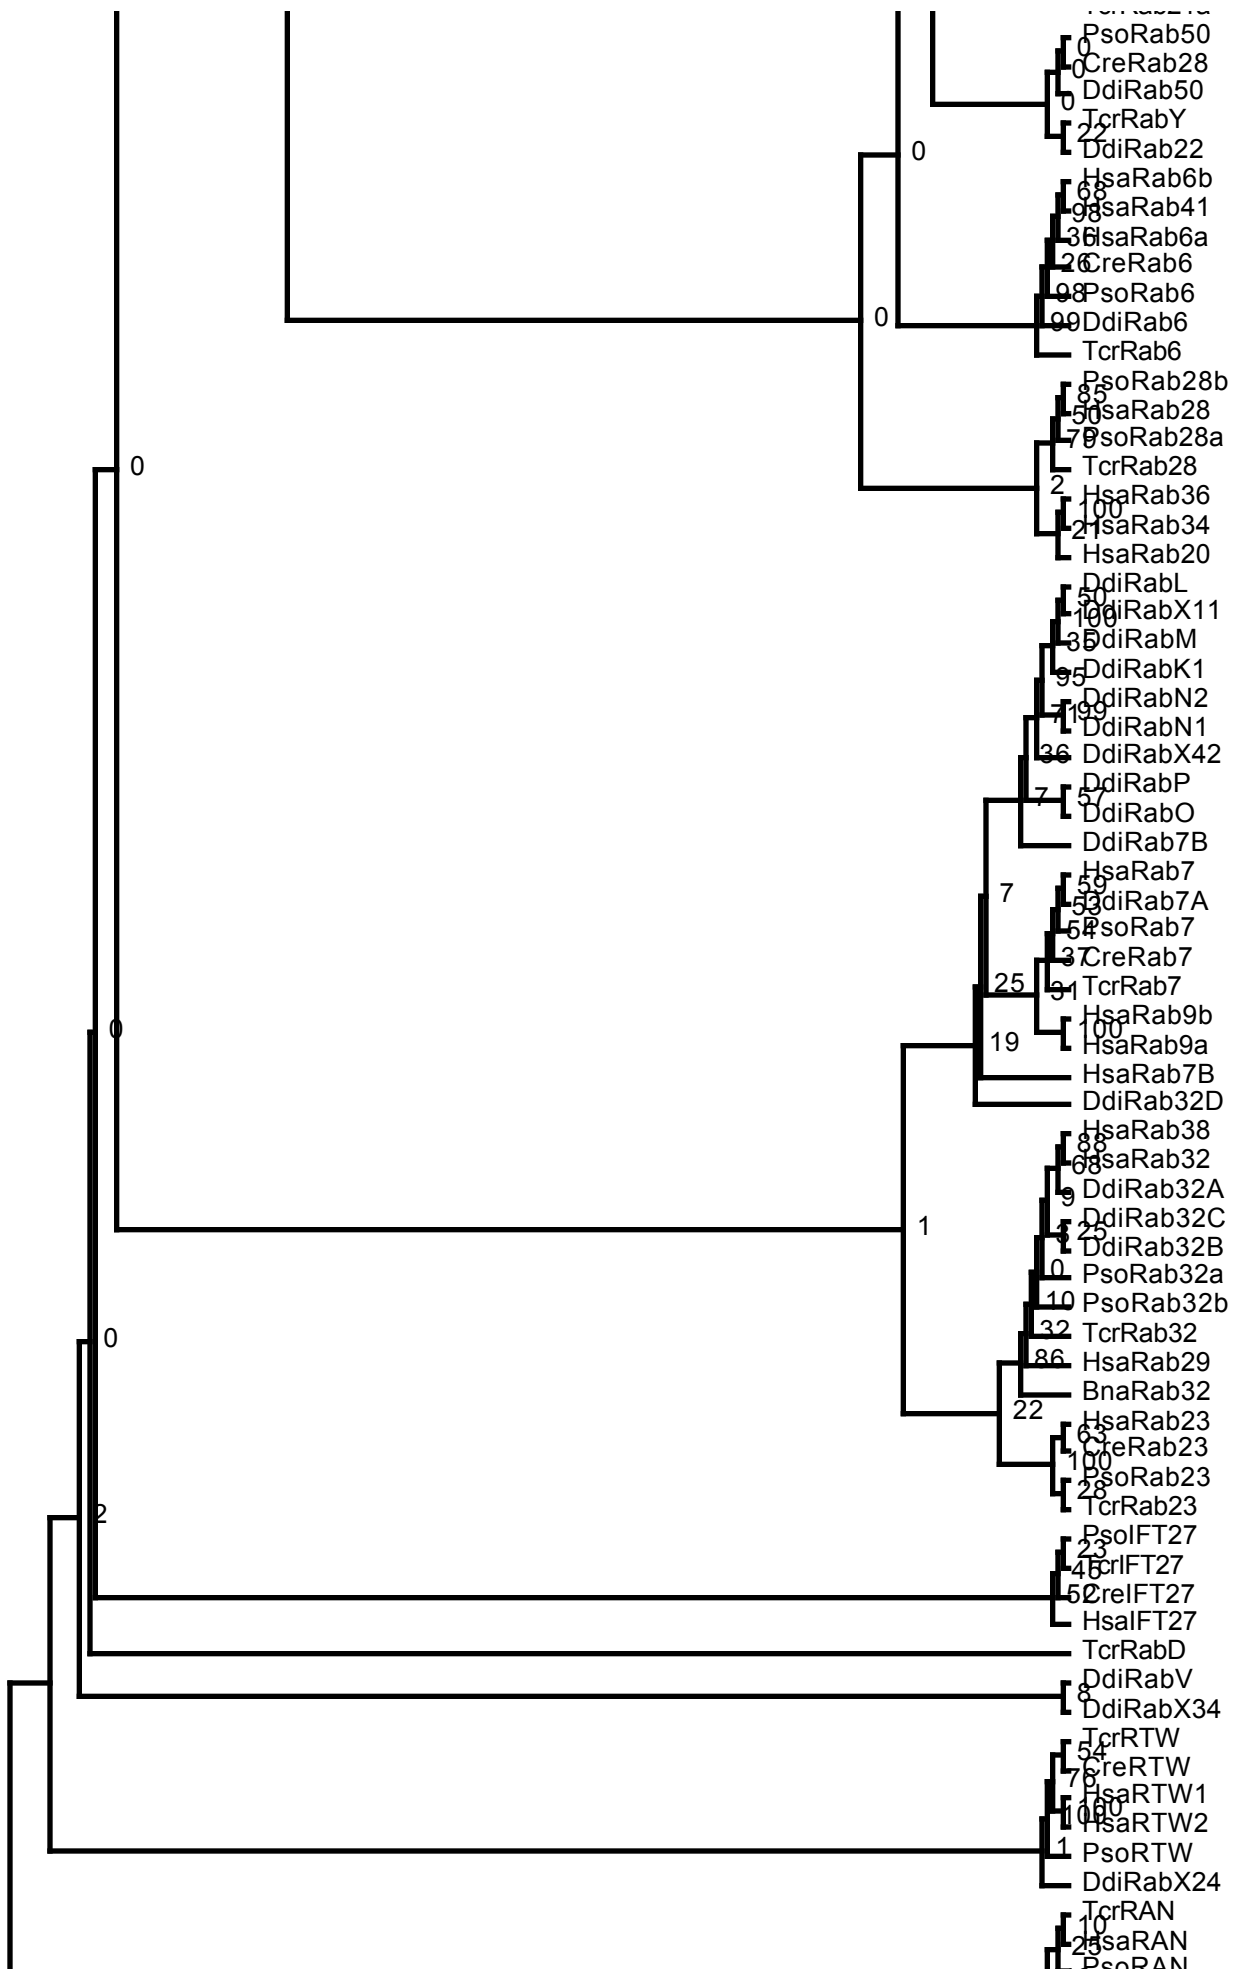

76 BnaRAN  
48 CreRAN  
56 DdiRanA  
95 DdiRanBC  
DdiRanBN



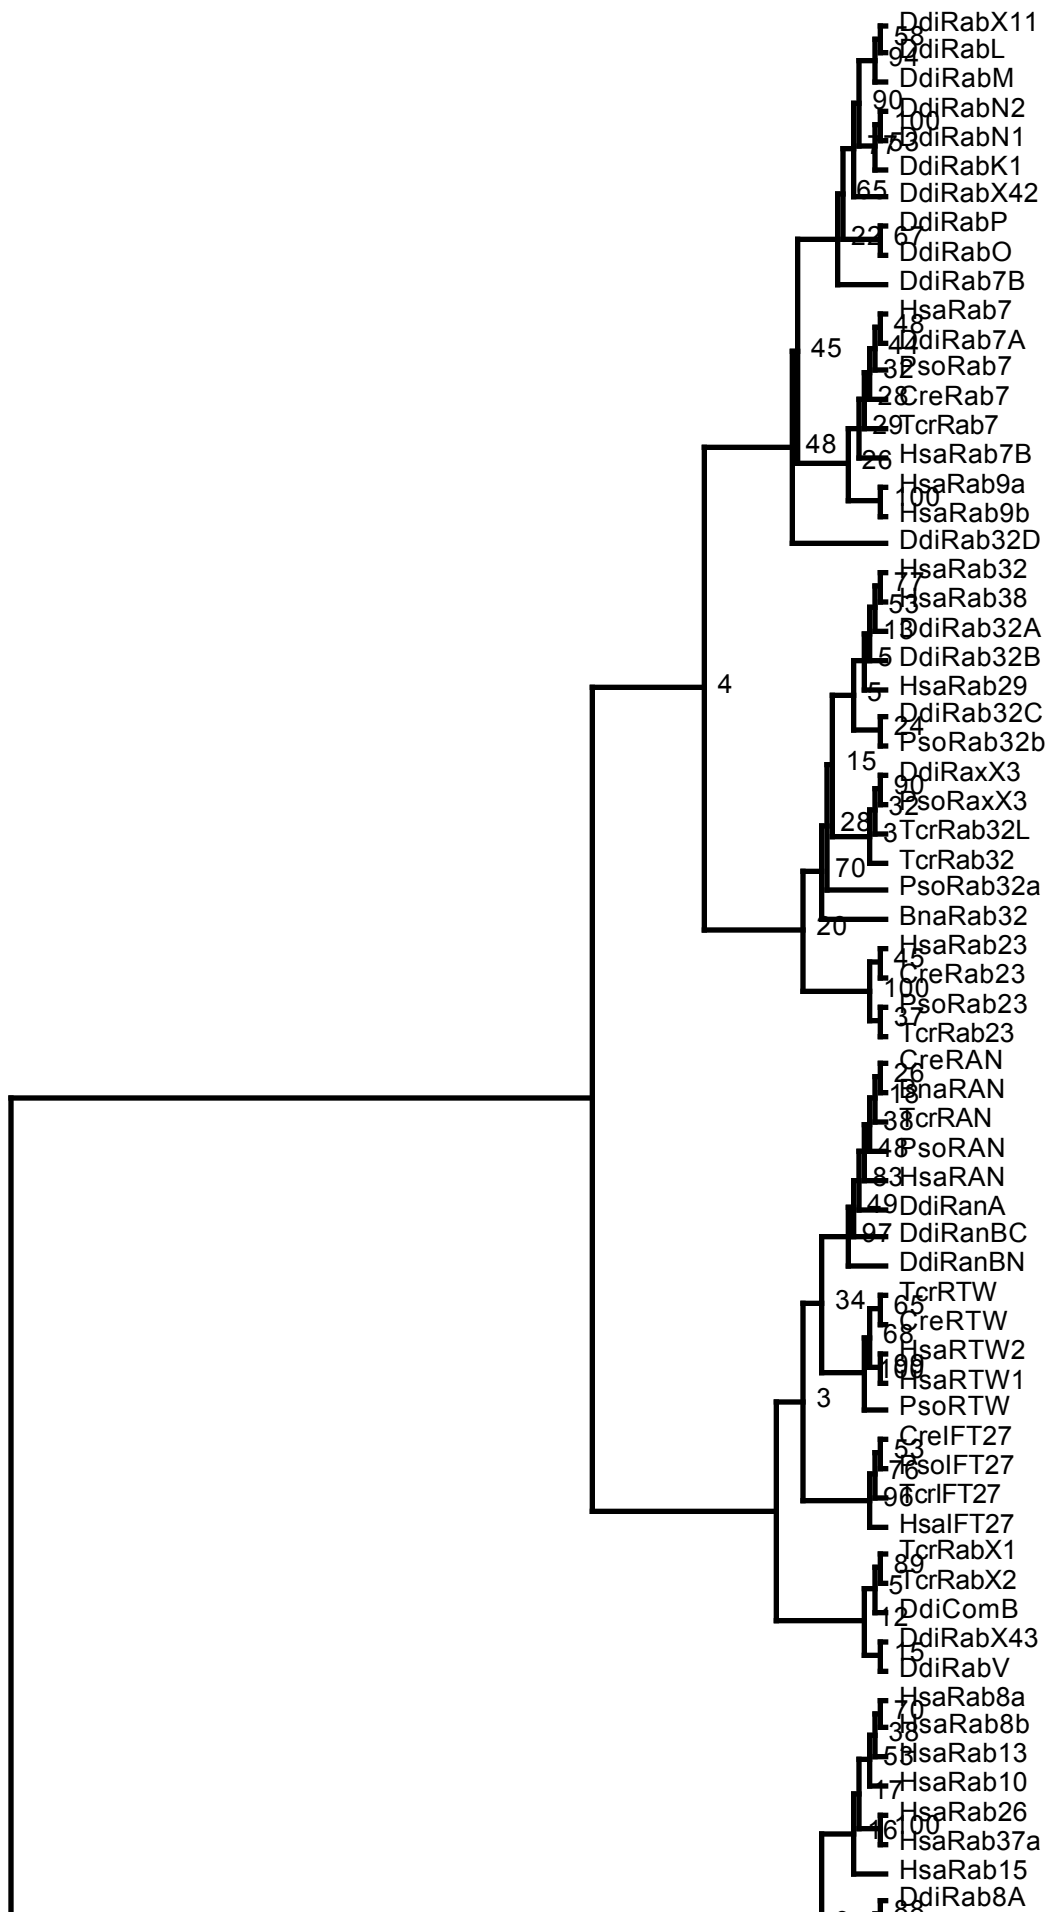

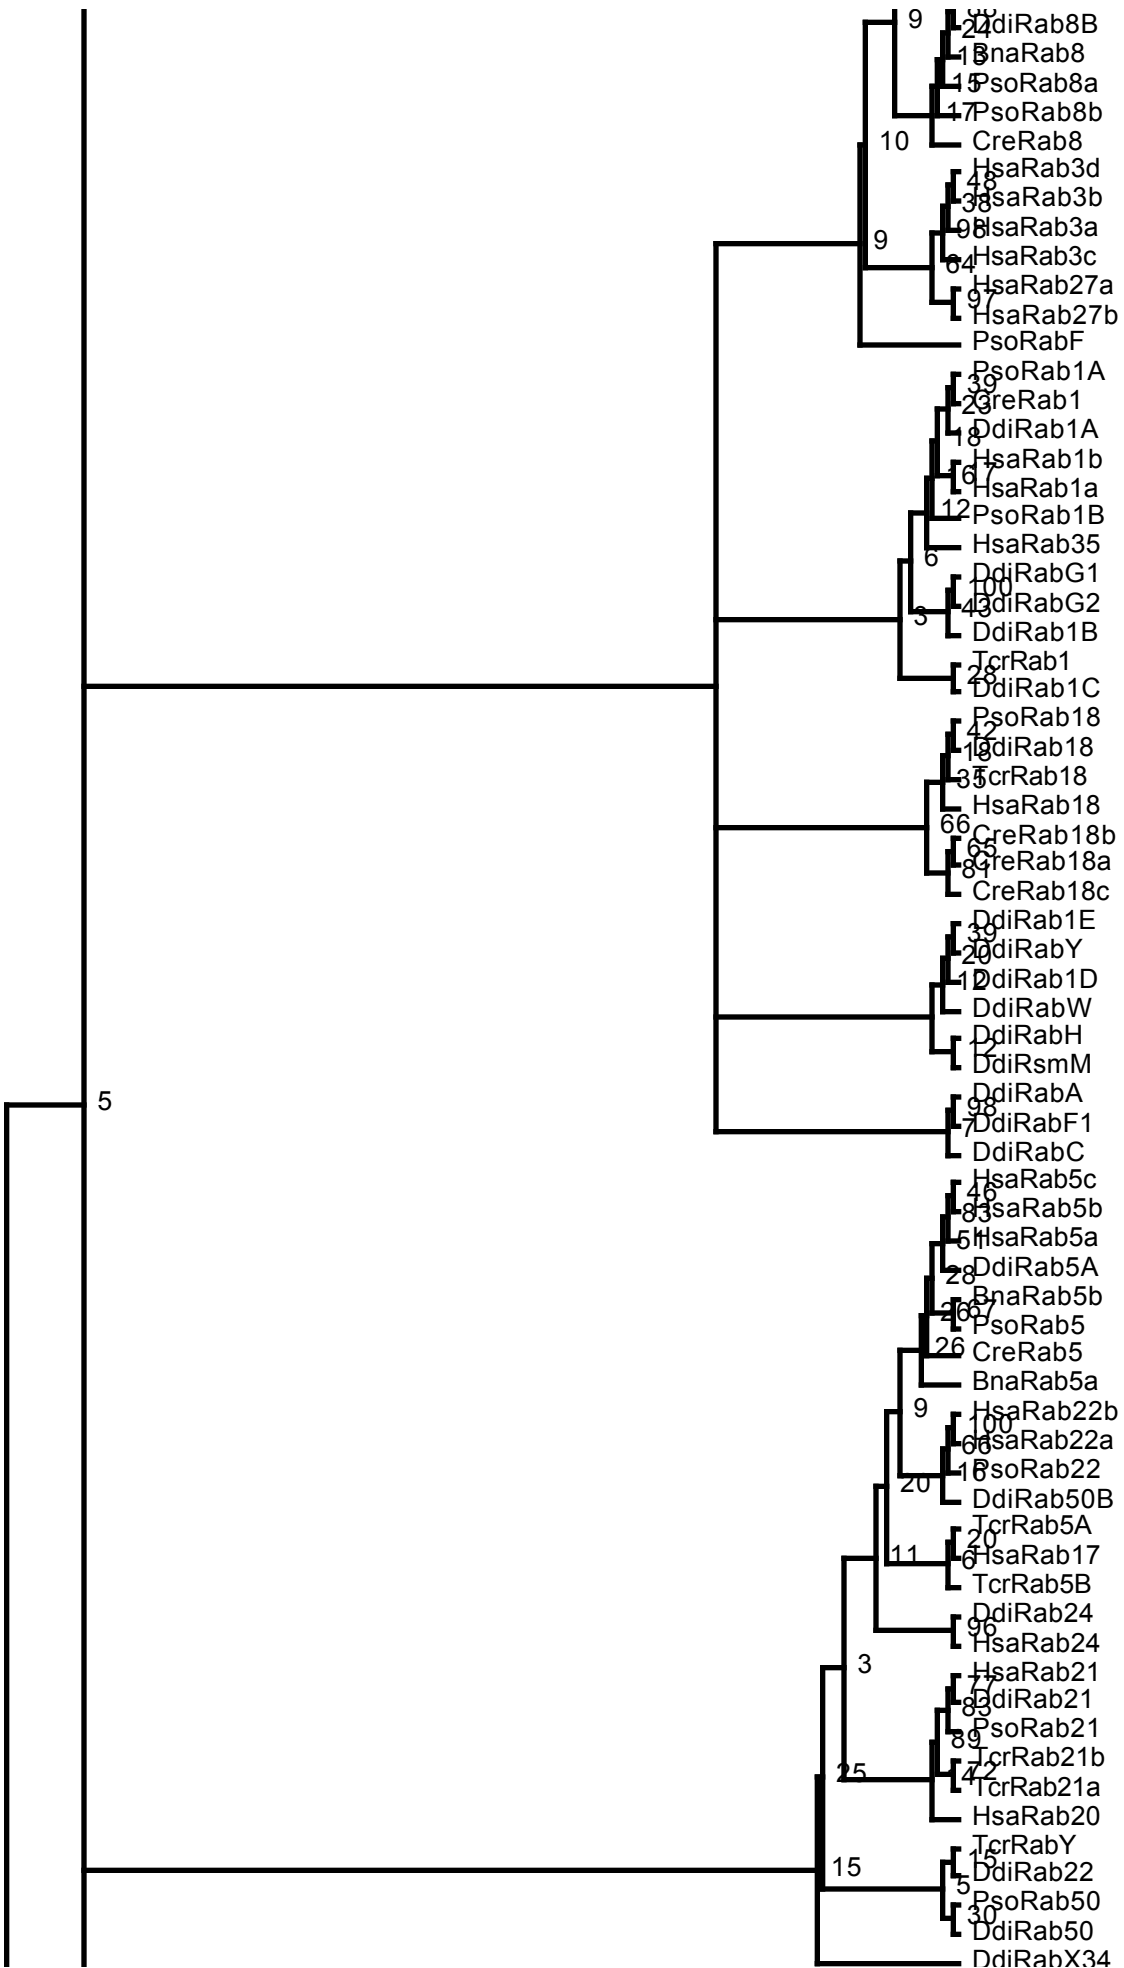

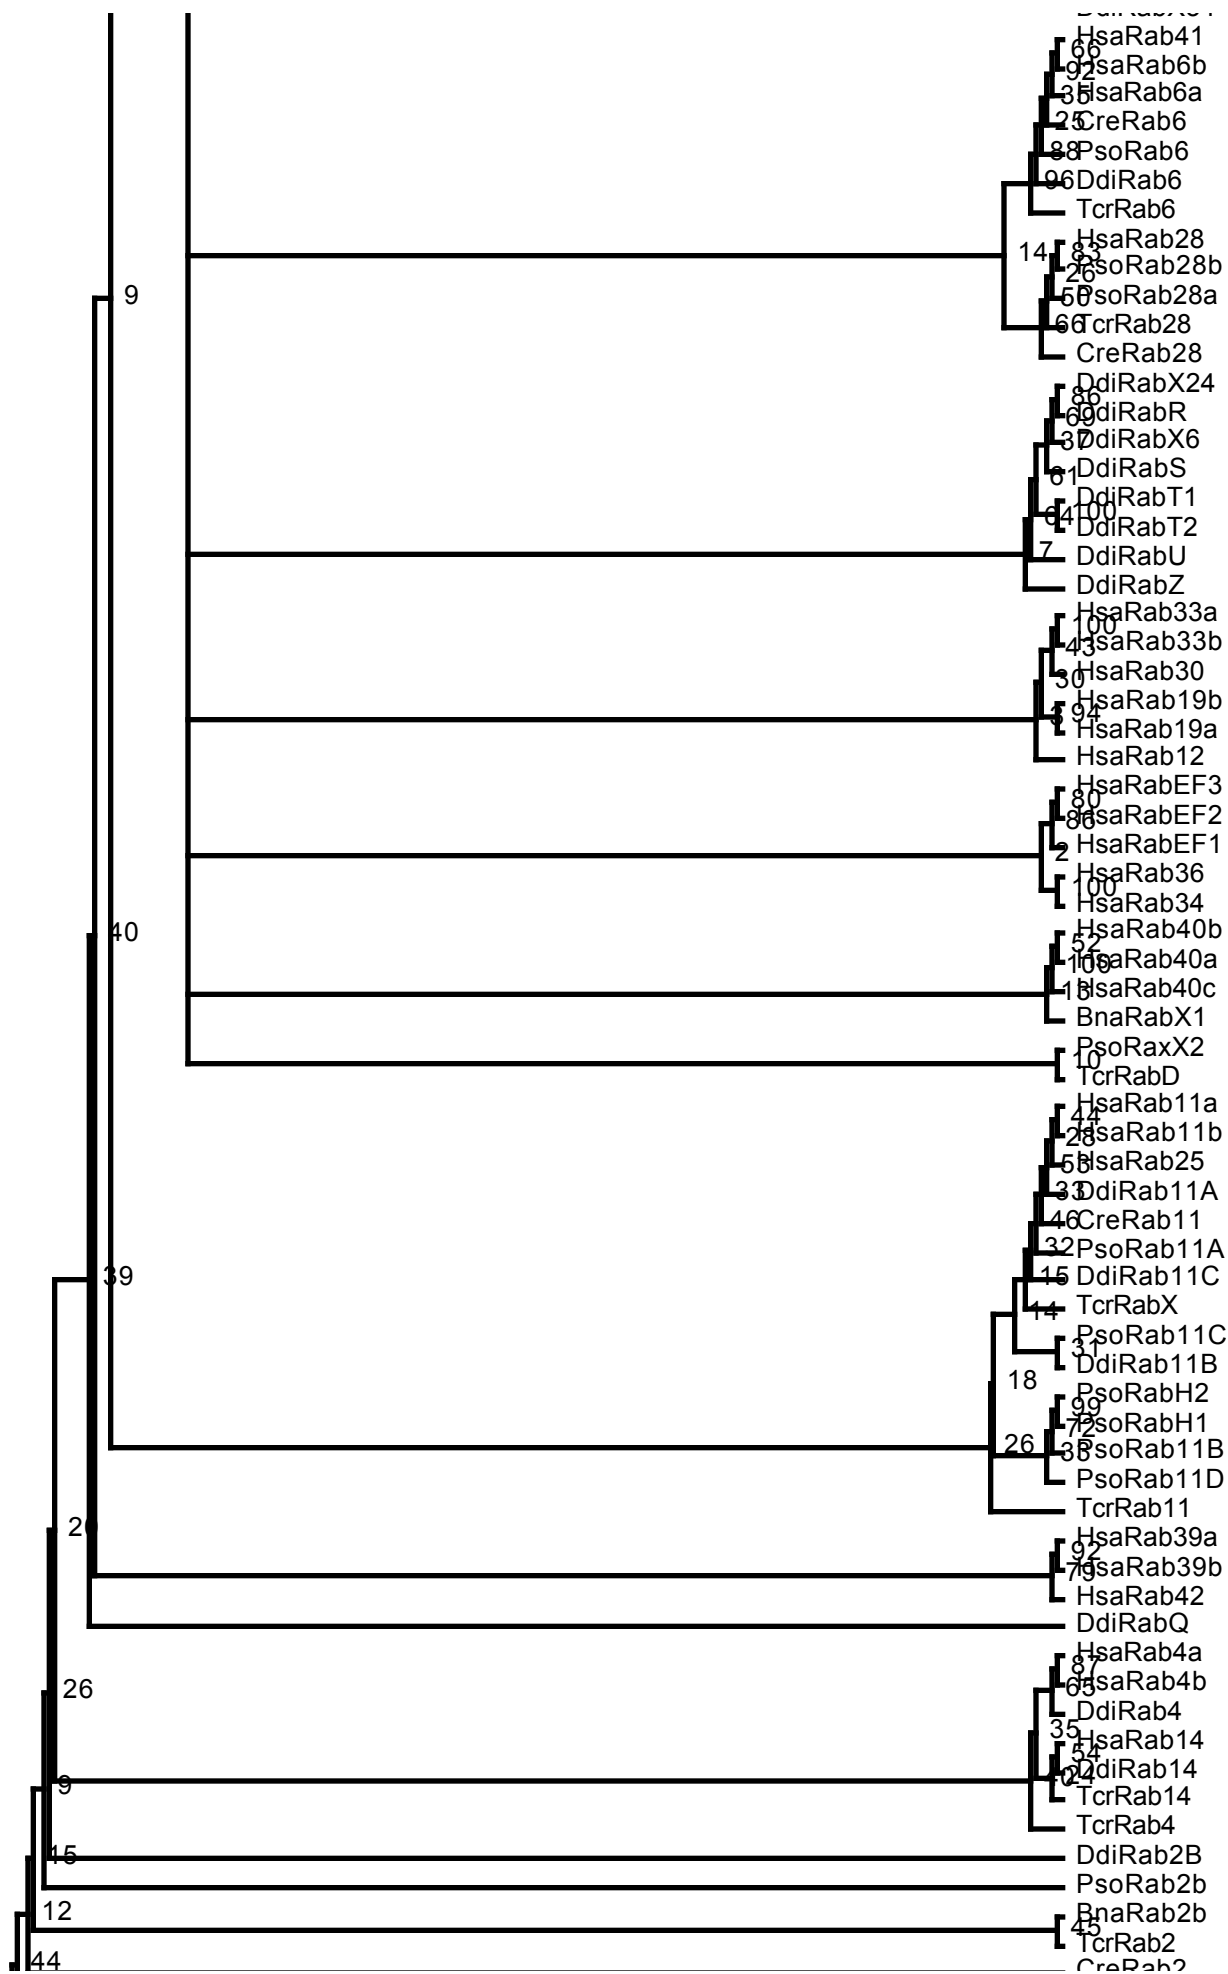

|     |          |
|-----|----------|
|     | UtaRab2  |
| 47  | HsaRab2a |
|     | HsaRab2b |
| 100 | PsoRab2a |
|     | BnaRab2a |
|     | DdiRab2A |

Supplement: supp_125.10.2500_JCS101378FigS2.pdf [file supp_125.10.2500_JCS101378FigS2.pdf]

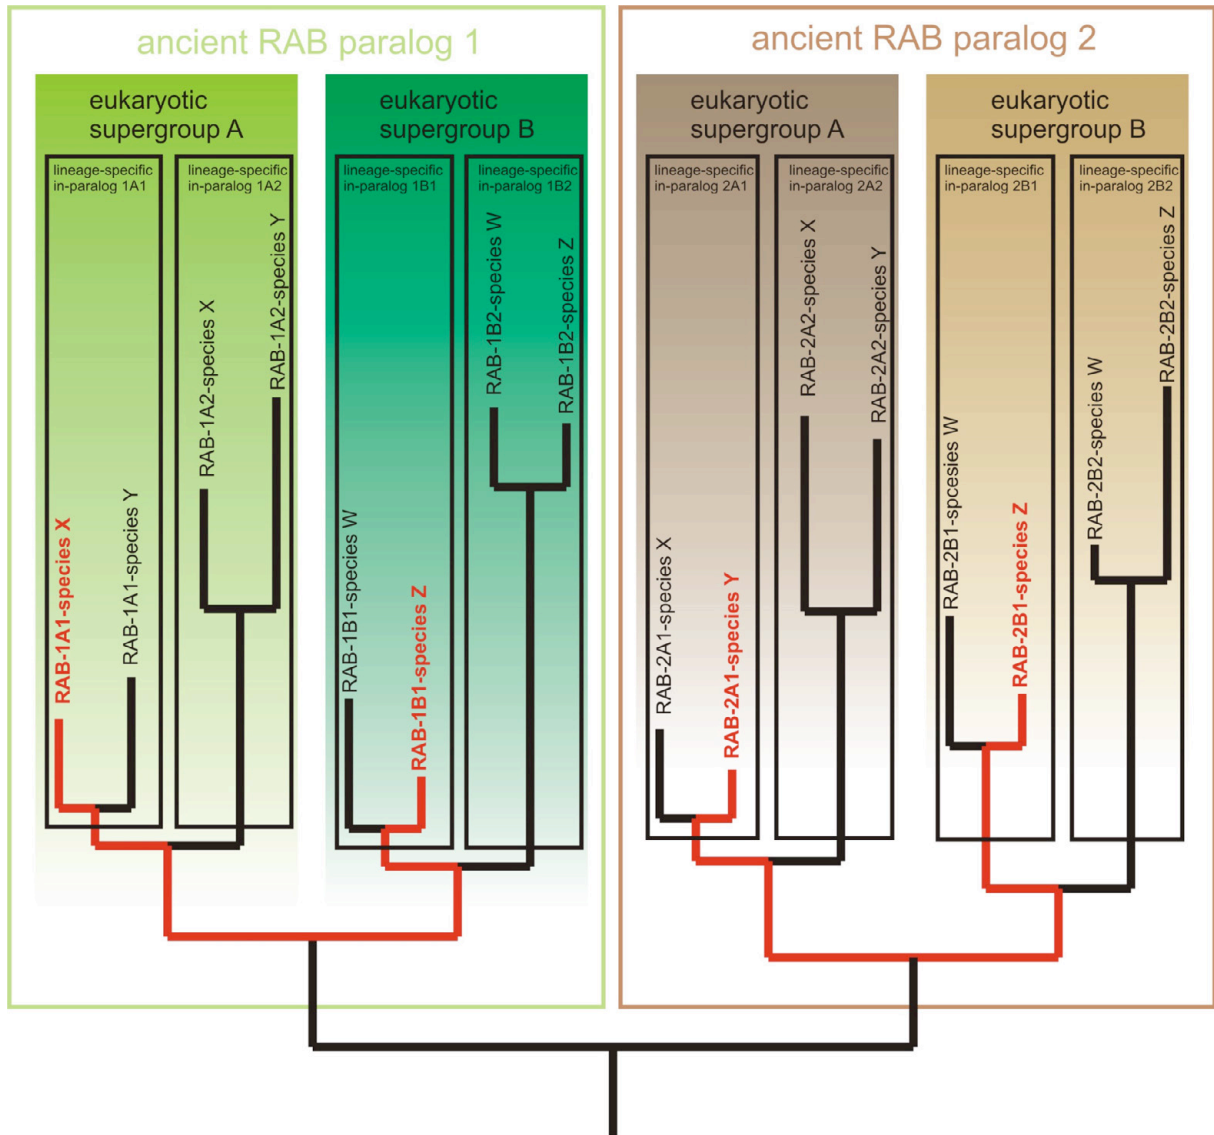

Elias et al. \_Figure S4.

Supplement: supp_125.10.2500_JCS101378FigS4.pdf [file supp_125.10.2500_JCS101378FigS4.pdf]

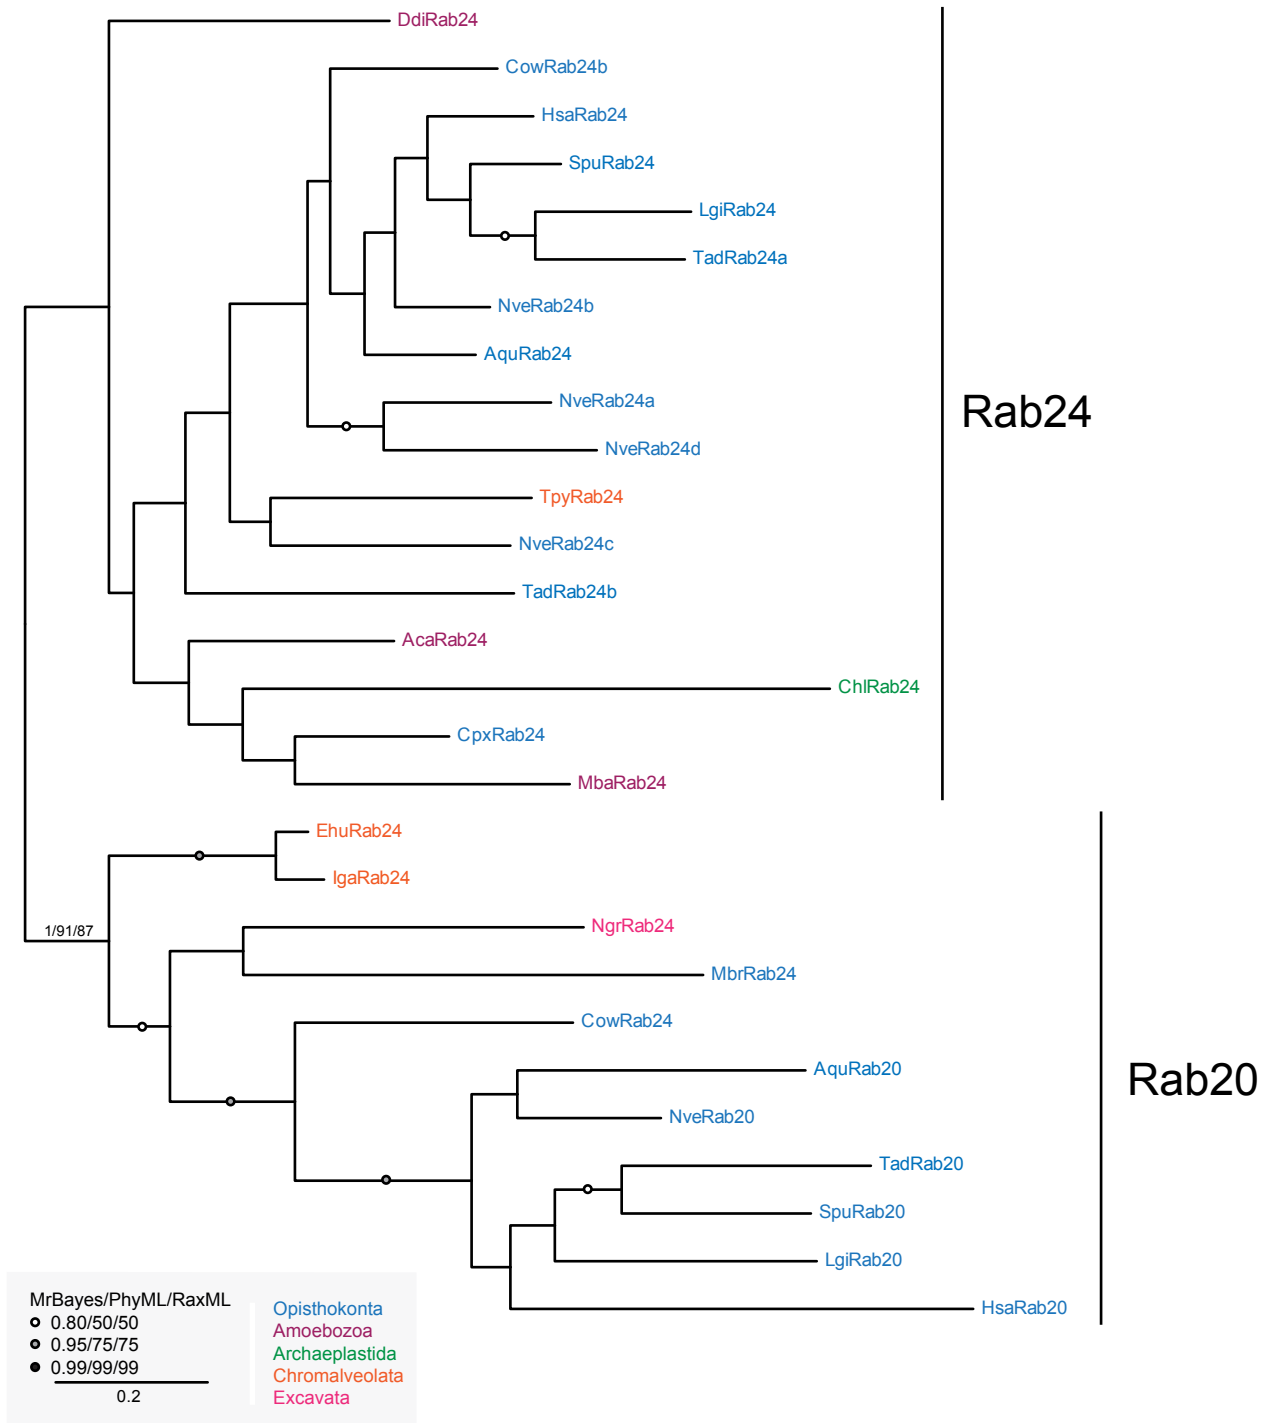

Elias. et al. Figure S6: Phylogenetic analysis of expanded Rab 20/24 dataset.

Supplement: supp_125.10.2500_JCS101378FigS6.pdf [file supp_125.10.2500_JCS101378FigS6.pdf]

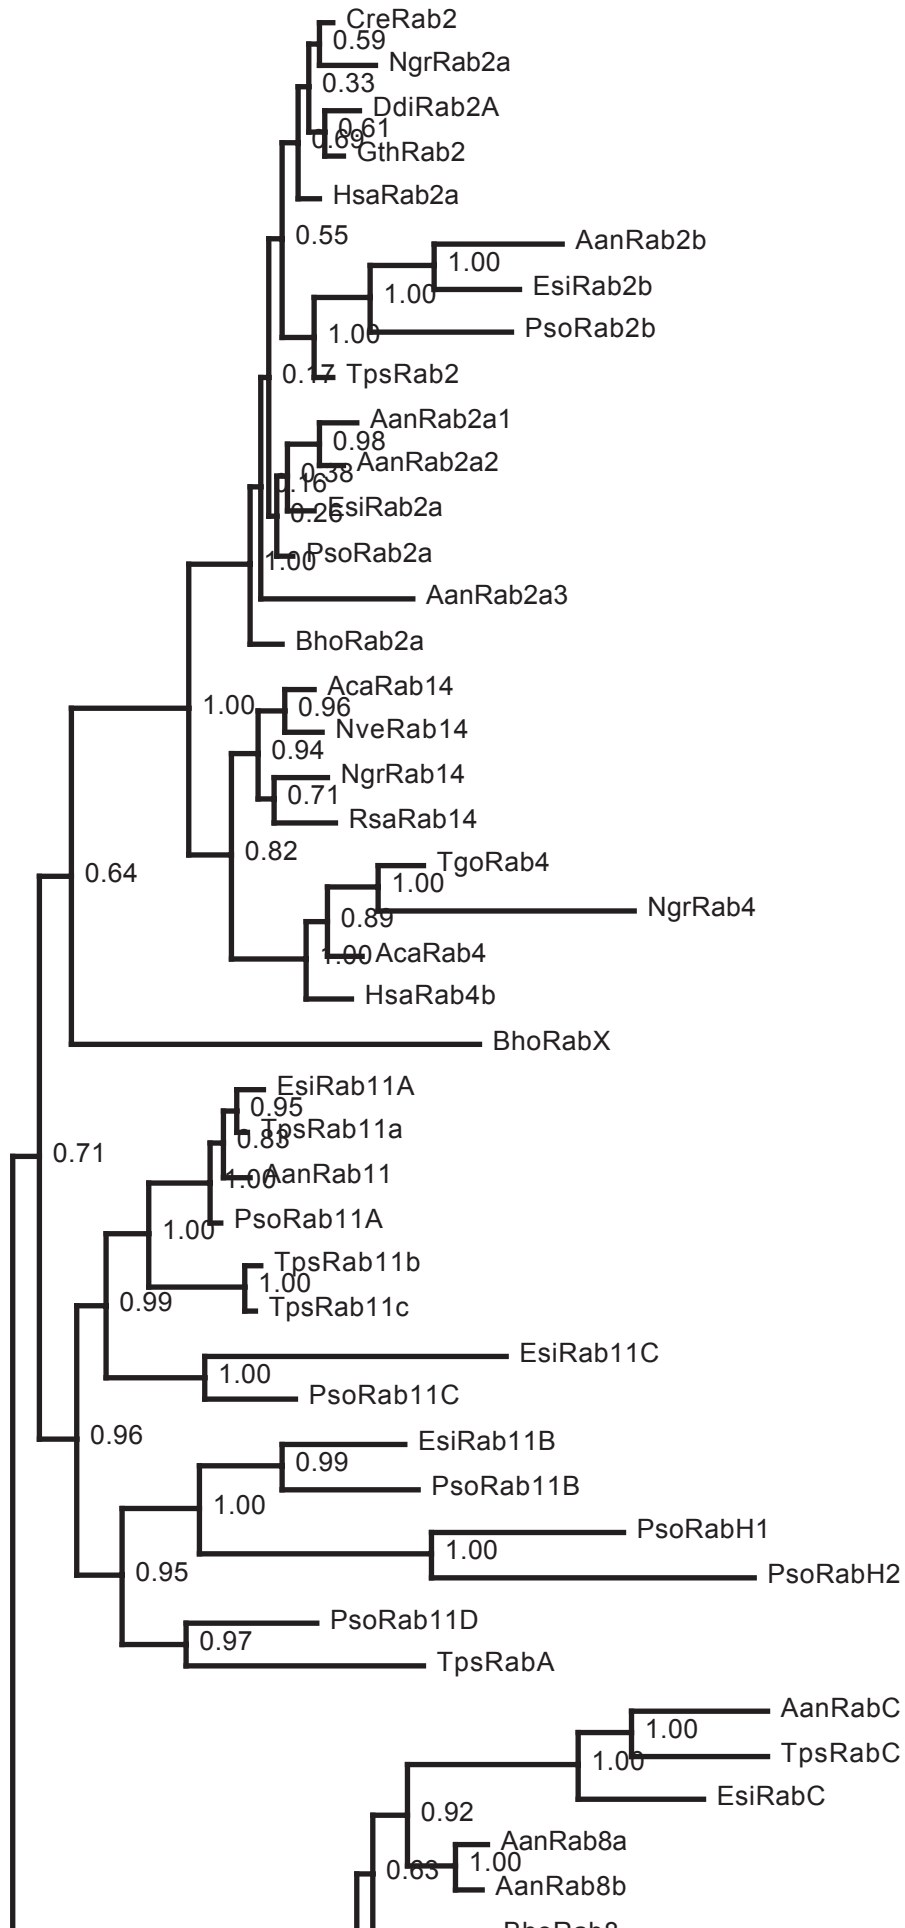

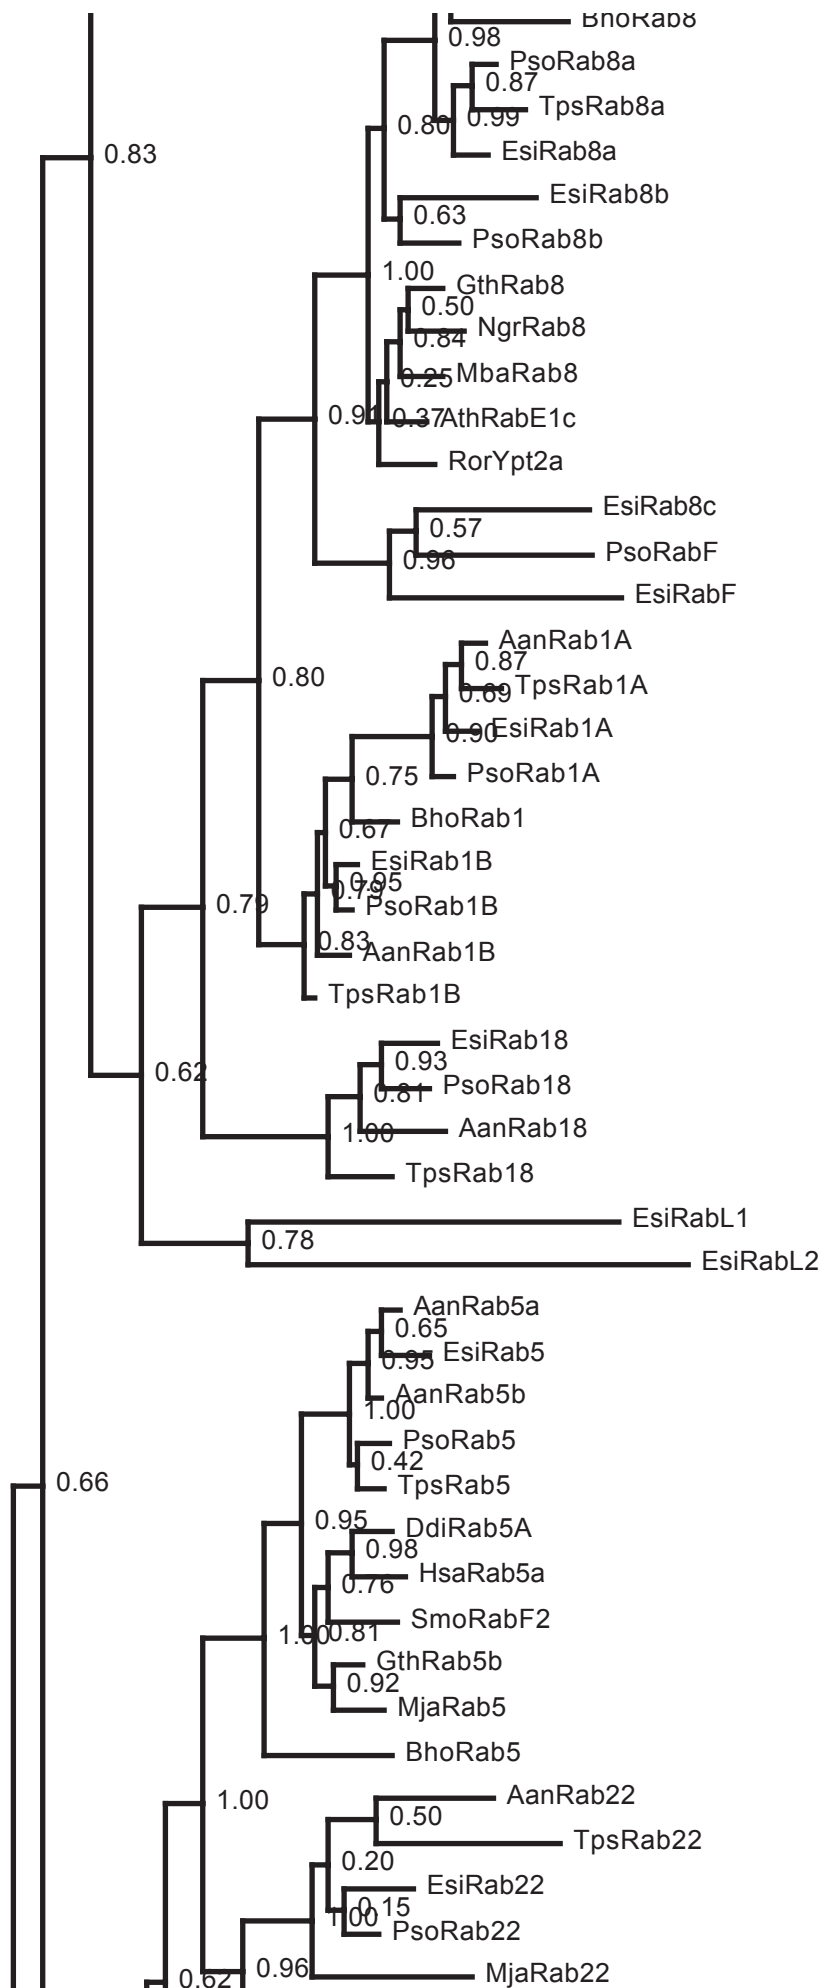

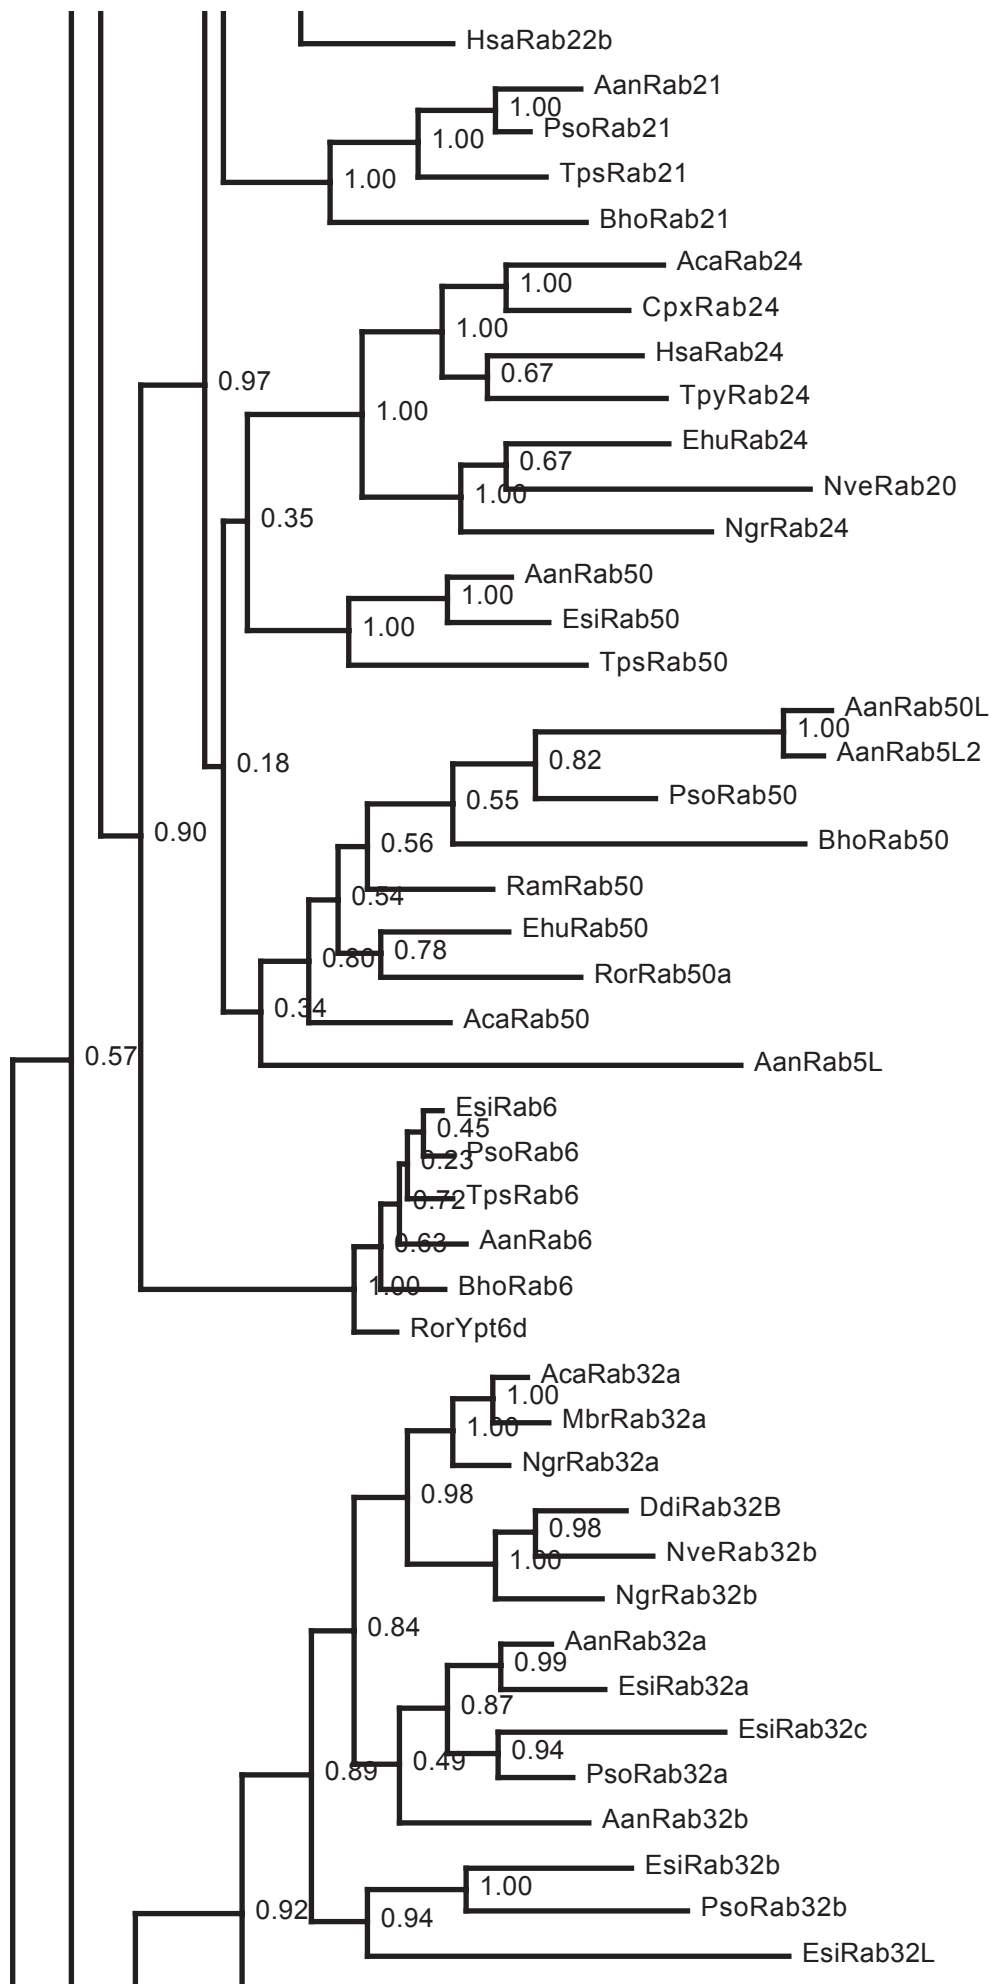

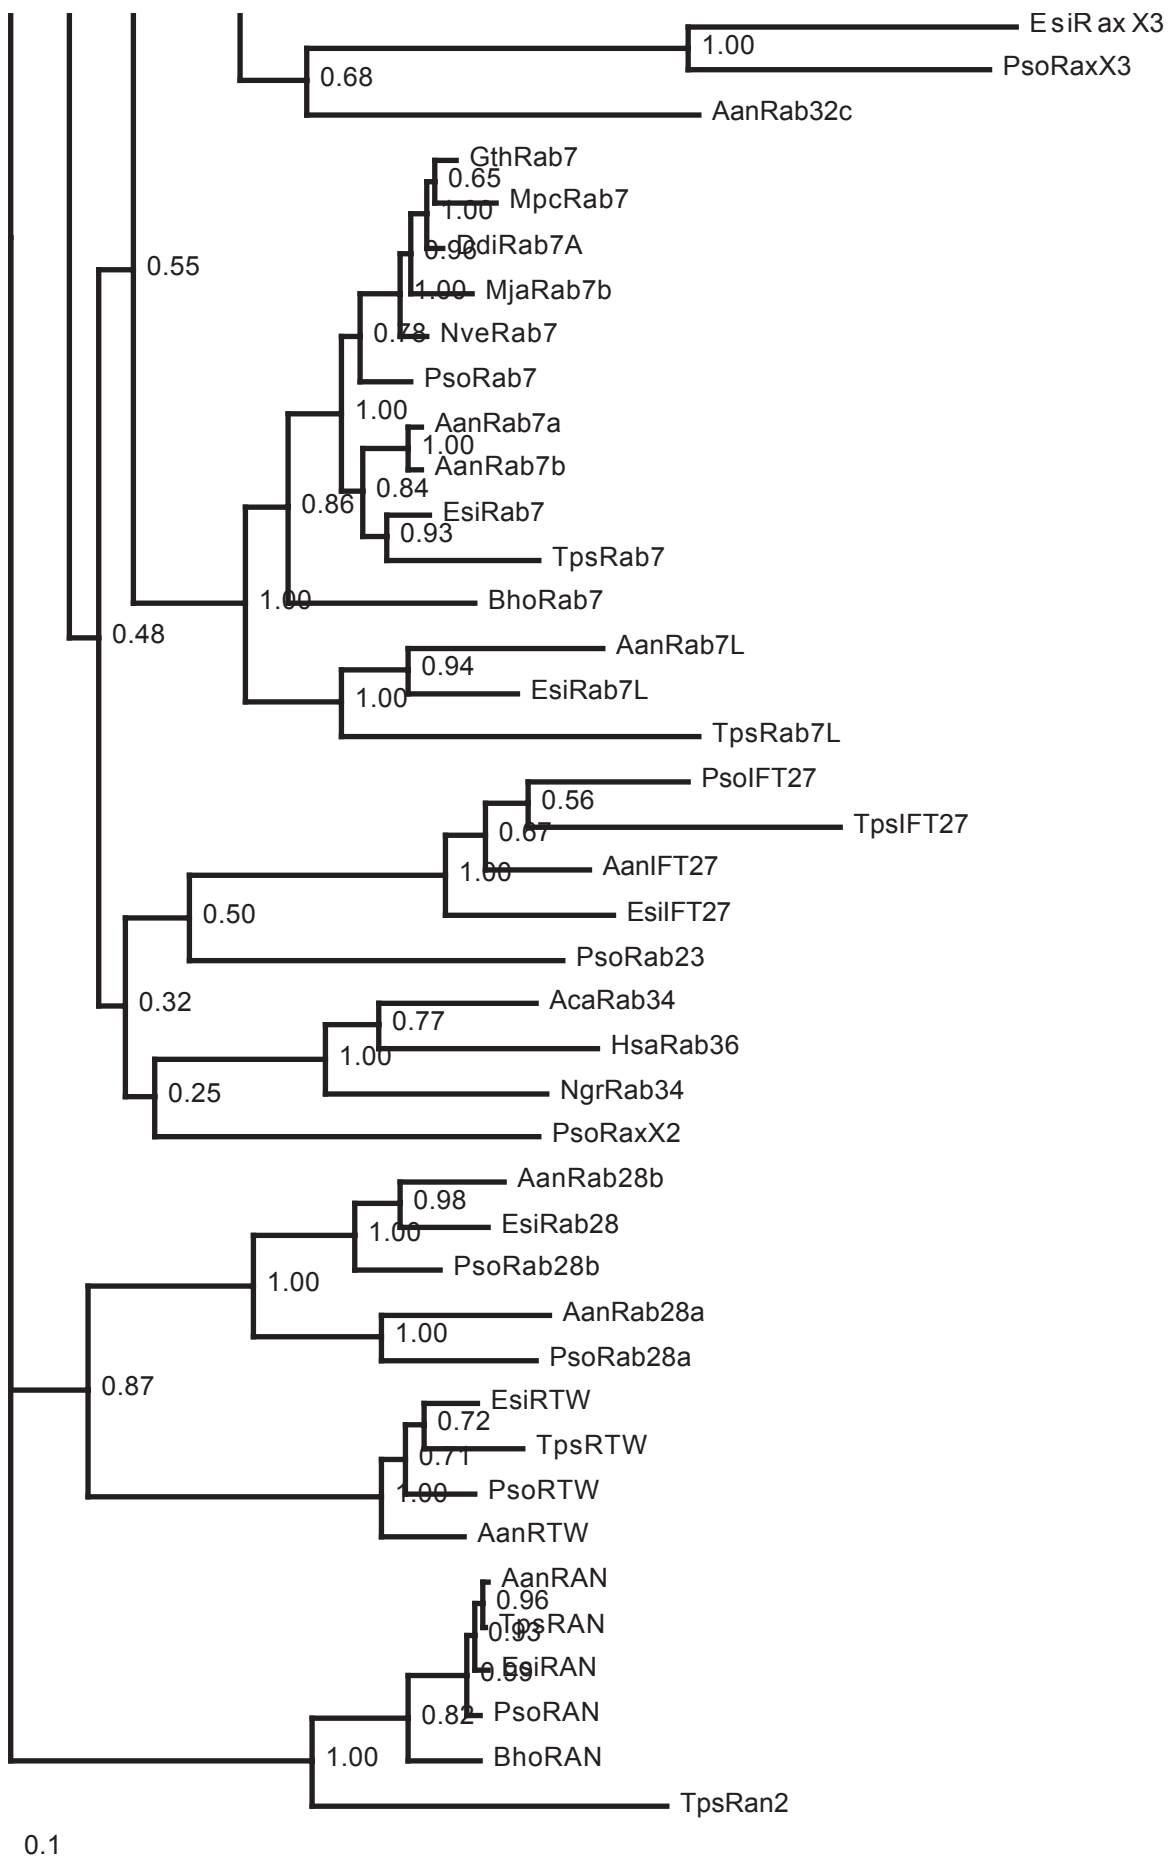

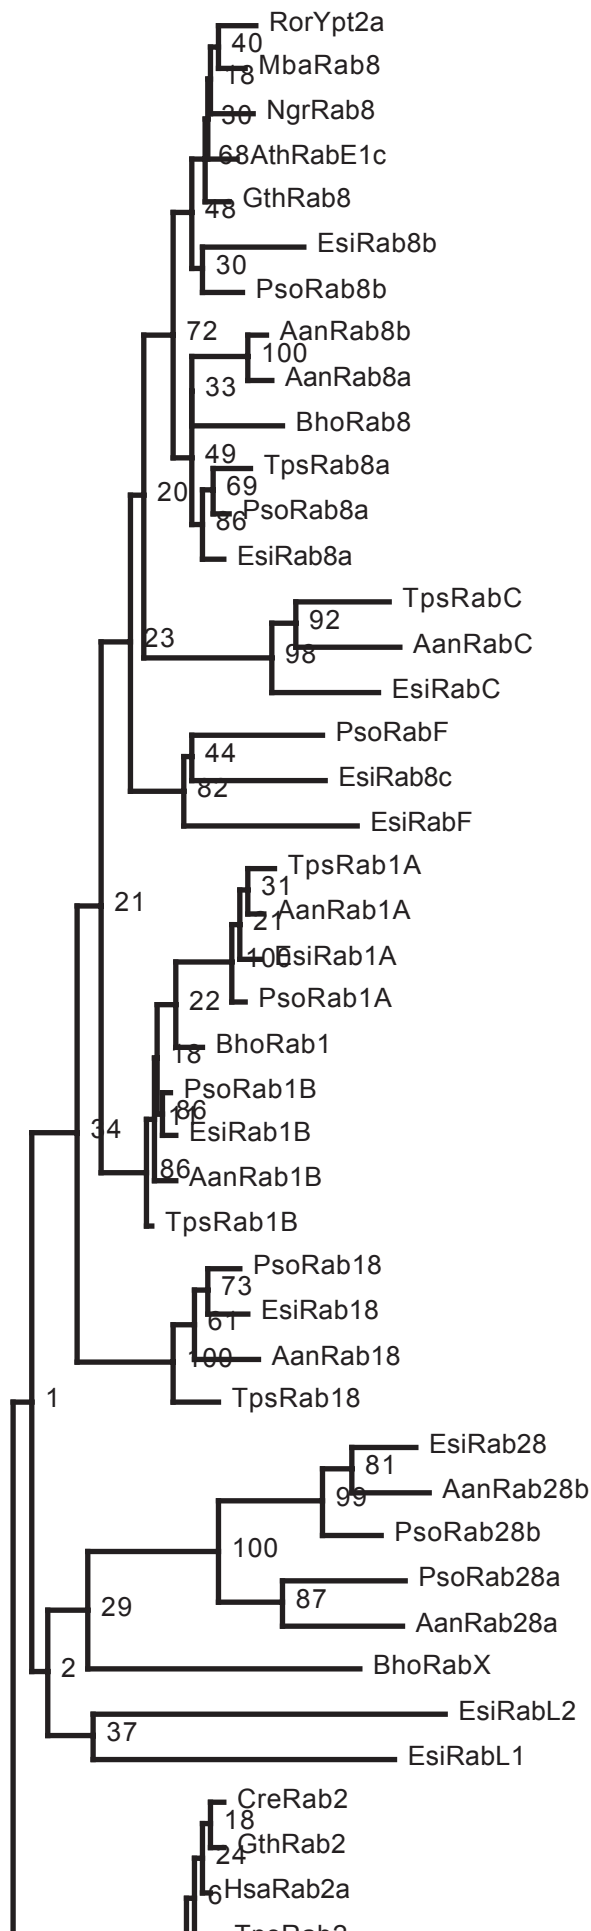

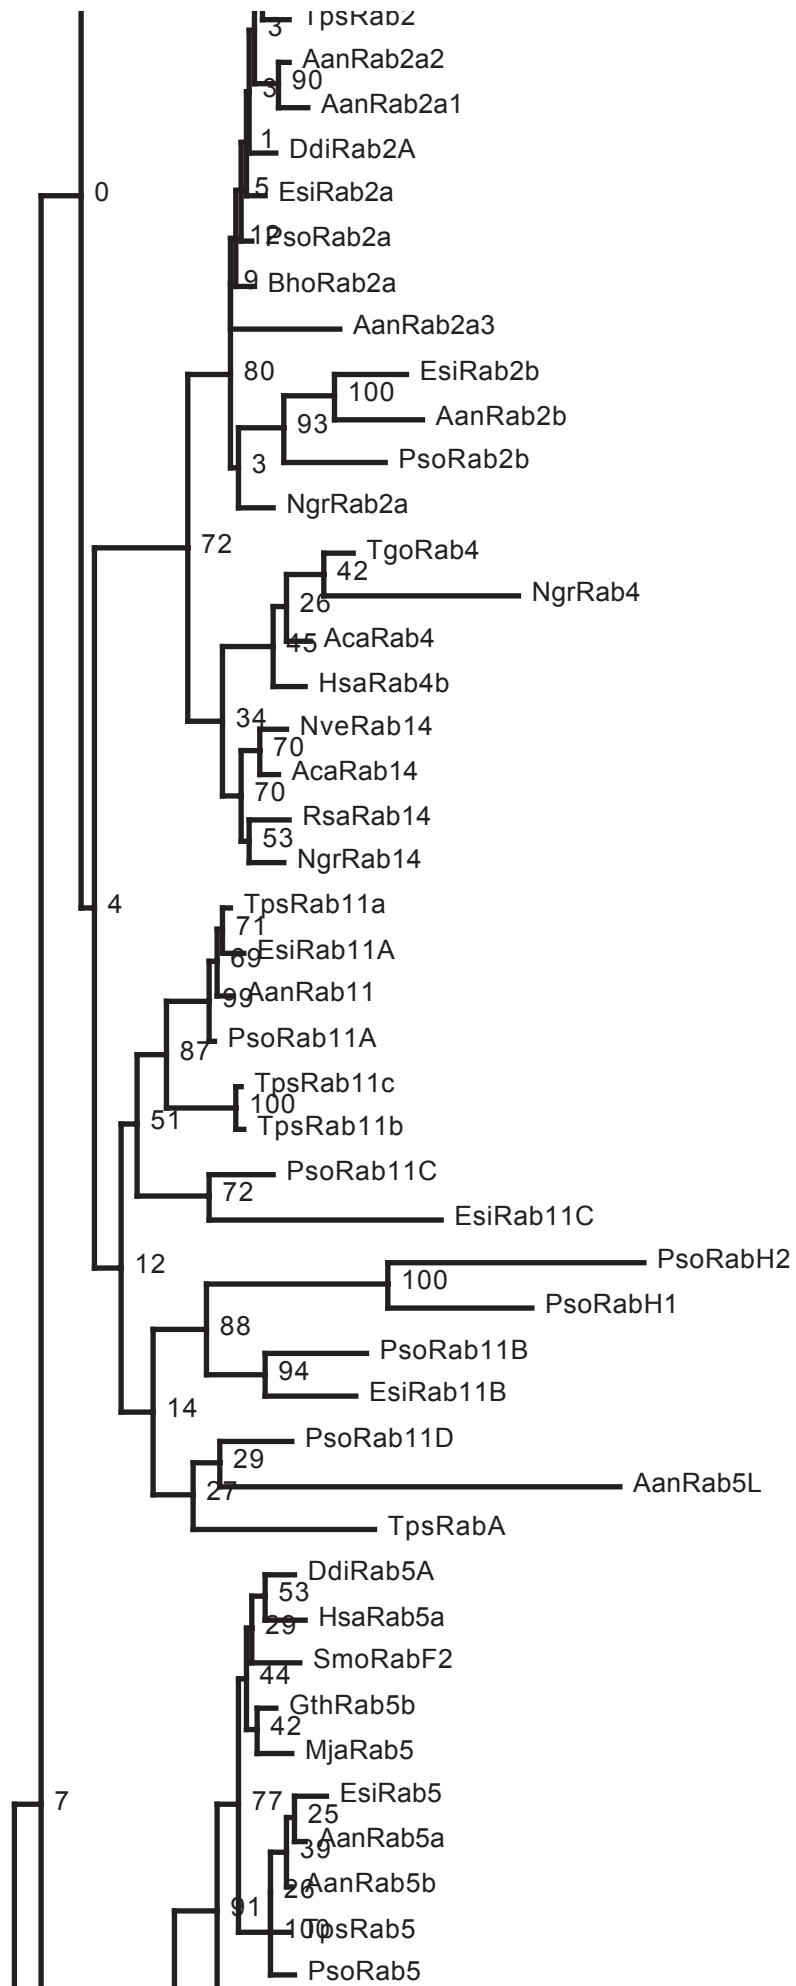



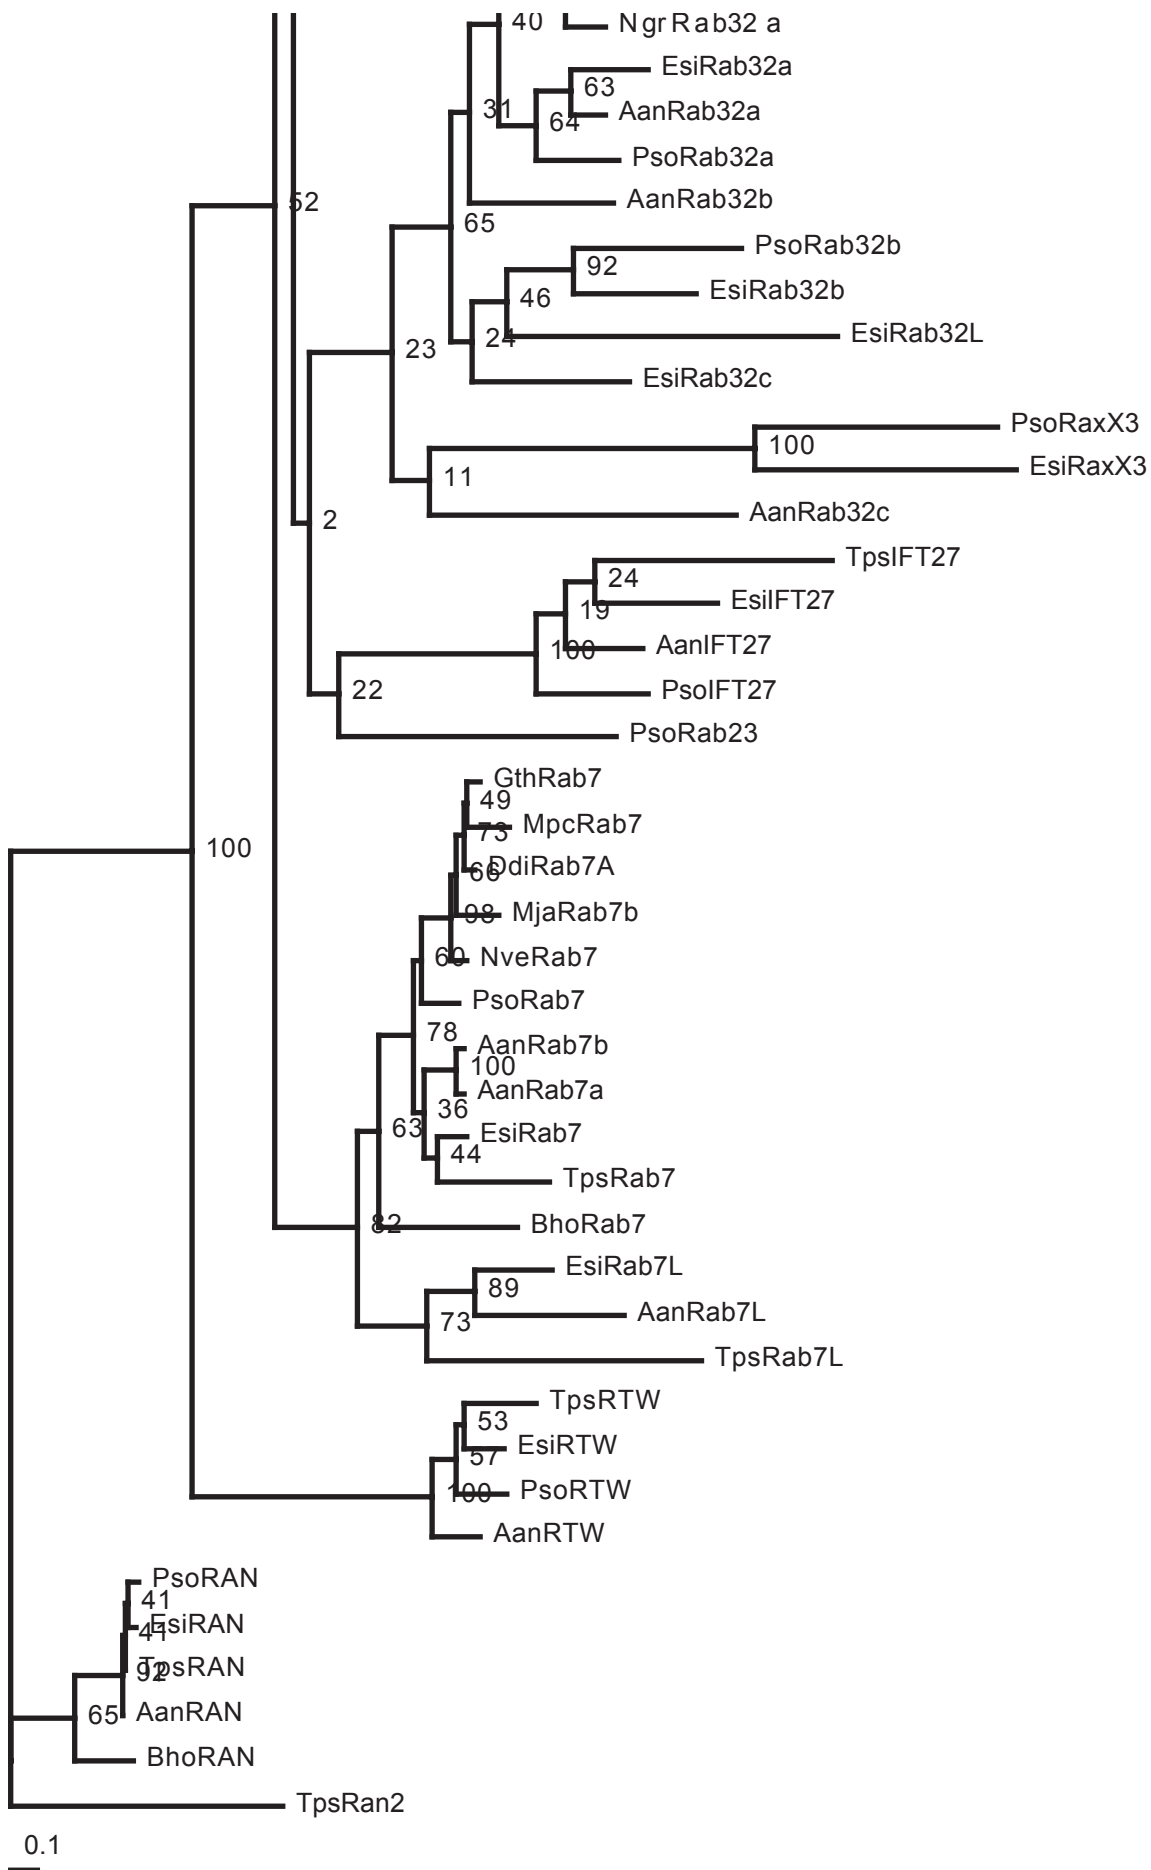

Elias et. al. Figure S8: PhyML\_page4



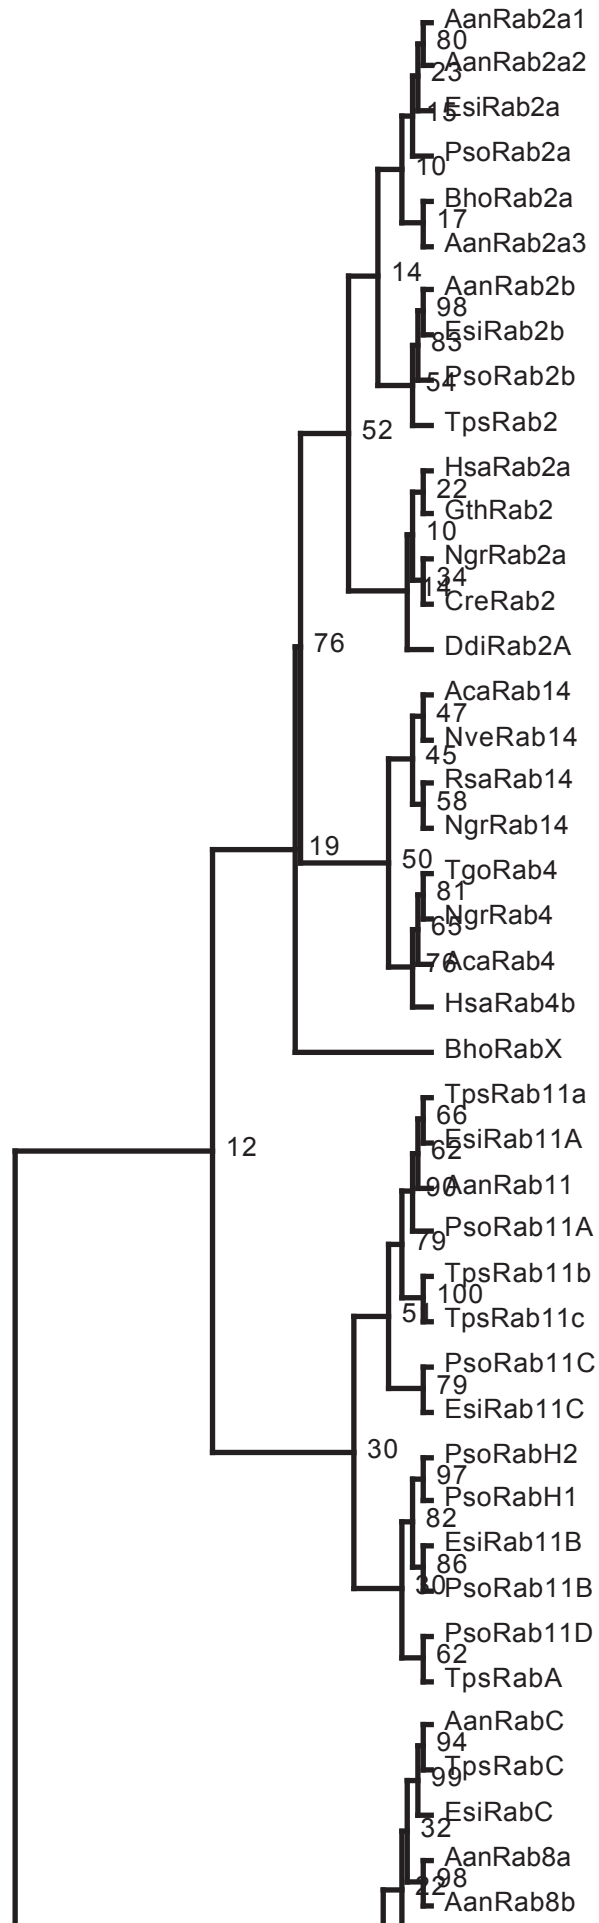

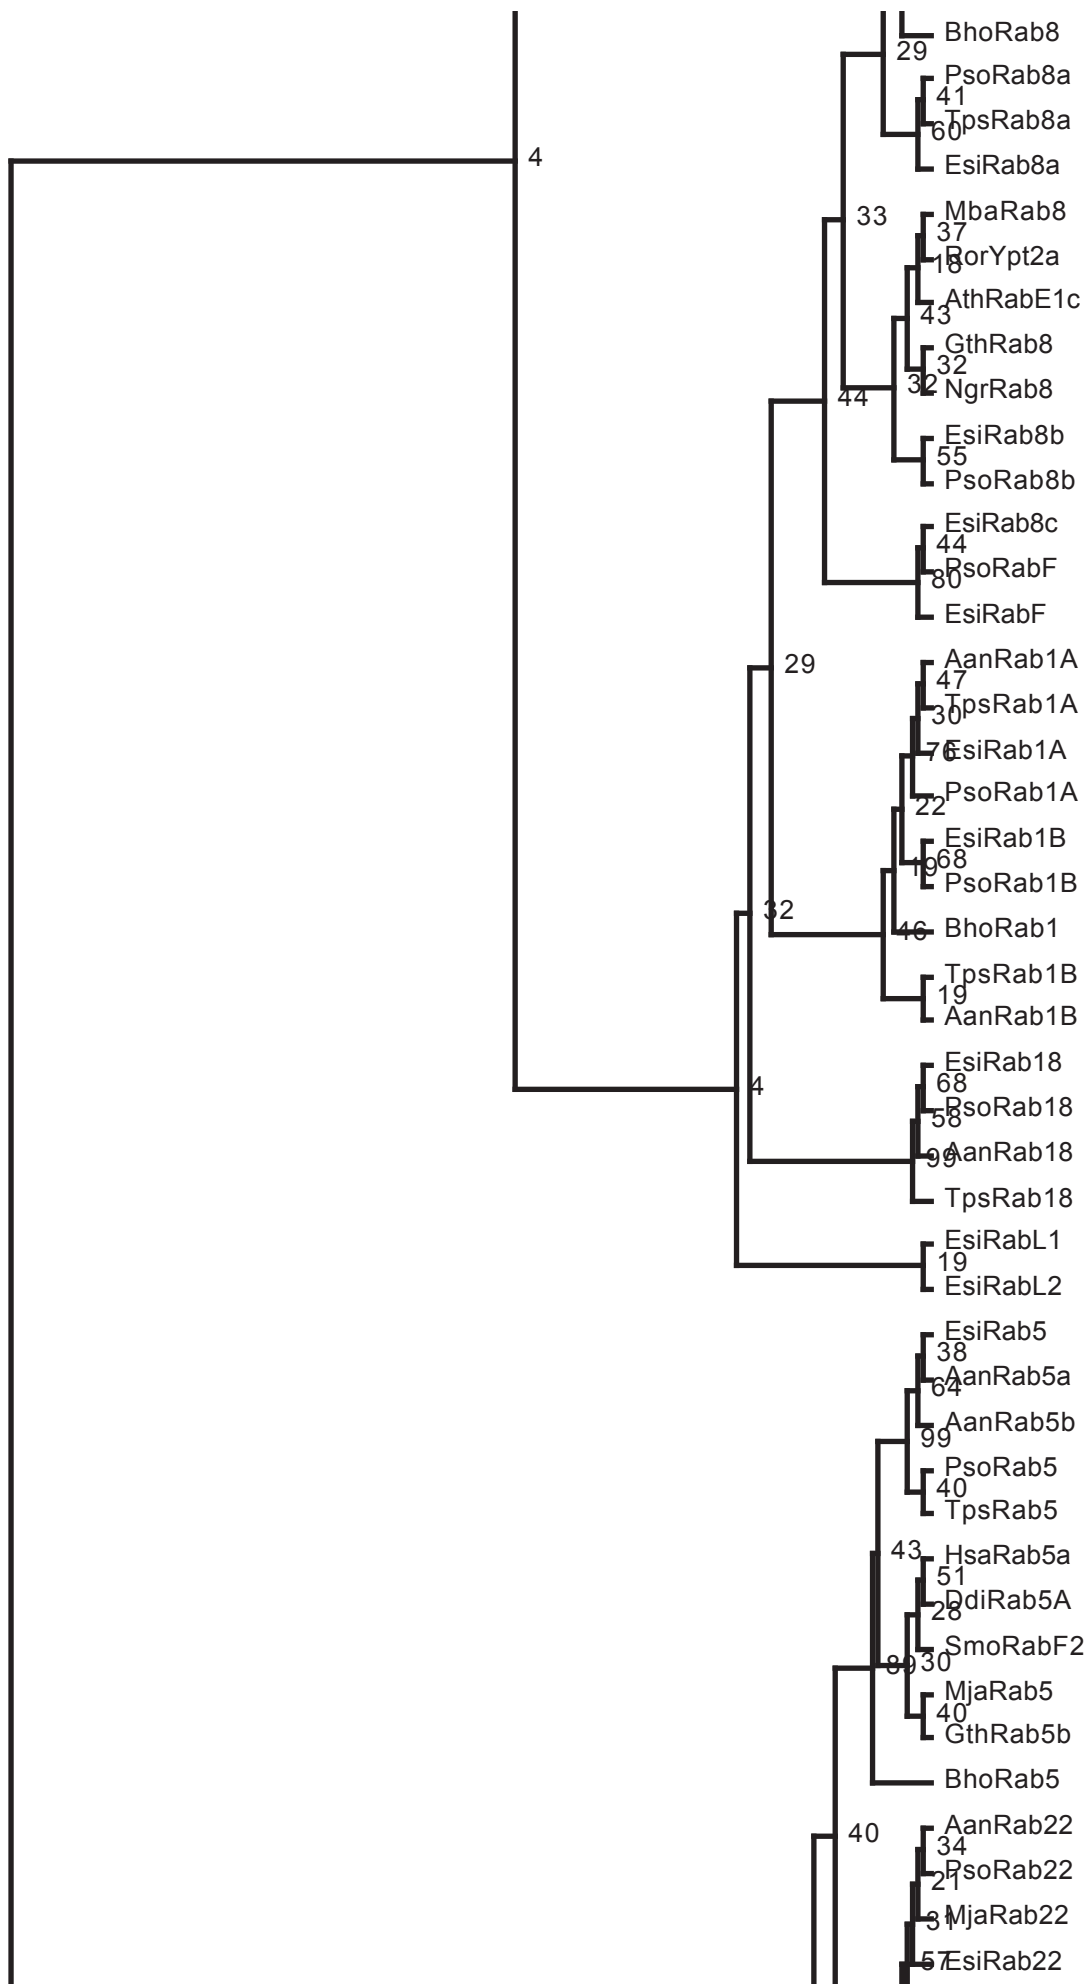

Elias et. al. Figure S8: RAxML\_page2

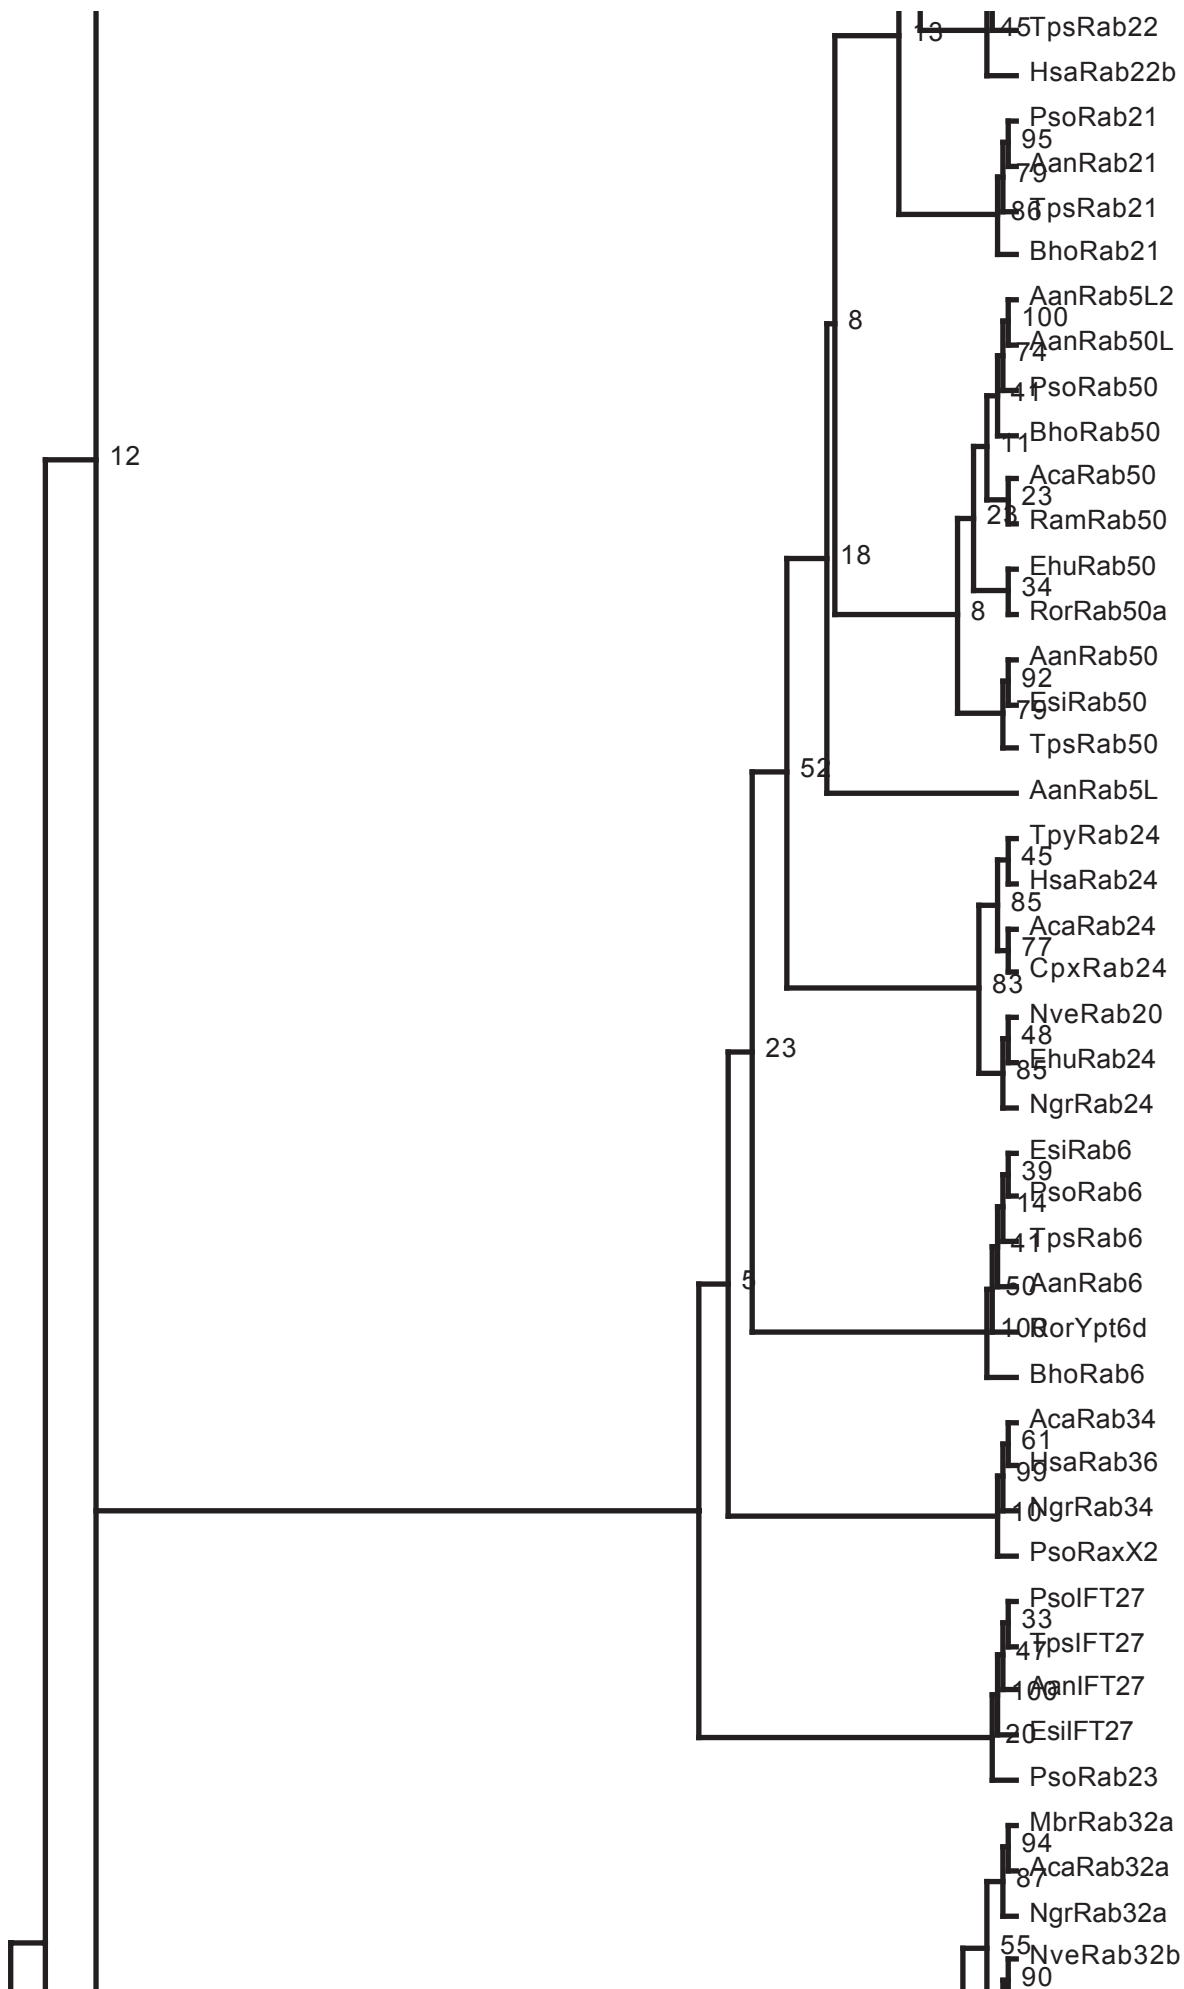

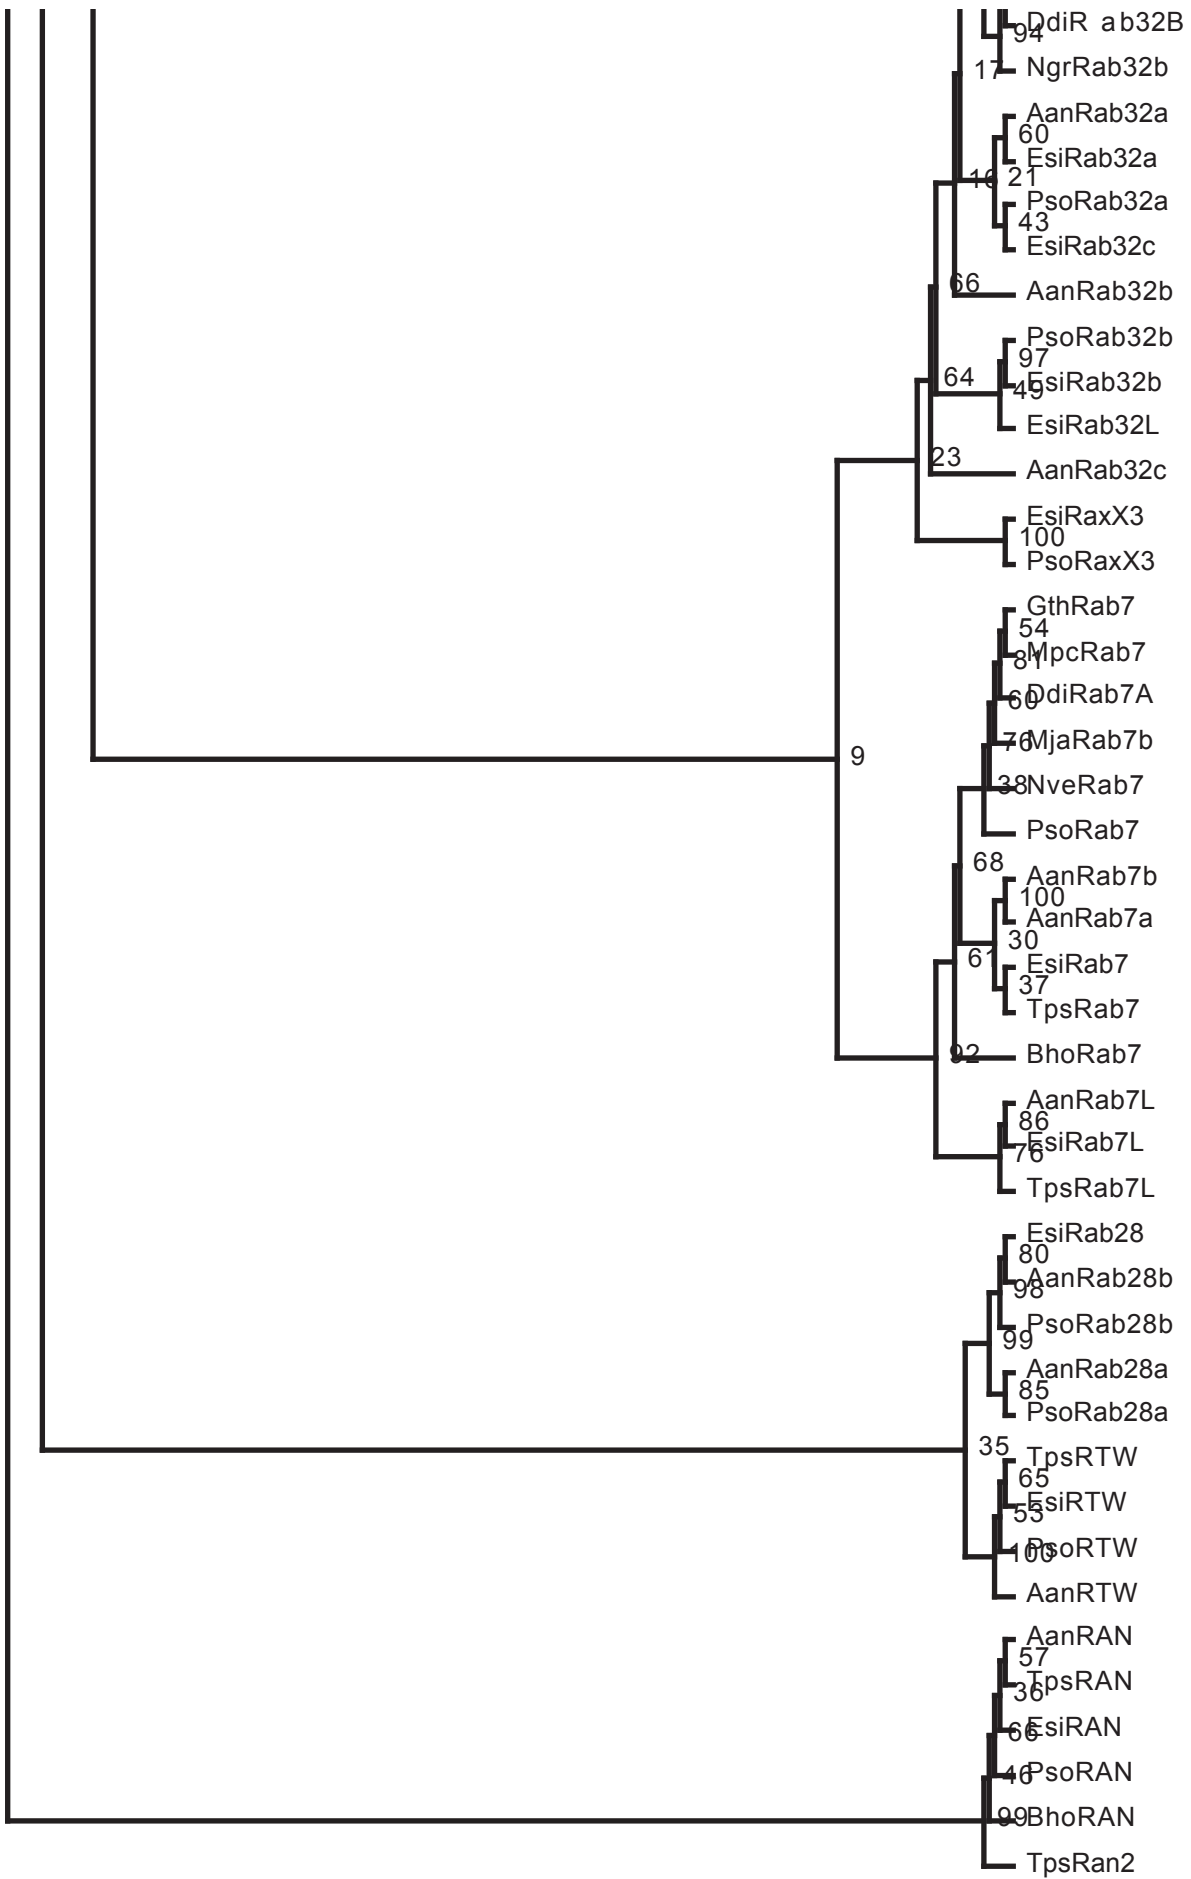

Elias et. al. Figure S8: RAXML\_page4

Supplement: supp_125.10.2500_JCS101378FigS8.pdf [file supp_125.10.2500_JCS101378FigS8.pdf]
